# Supplementary material for: Magnetite nanoparticles modulate microbial nitrate reduction pathways: Implications for nitrogen cycle in ferruginous oceans
Source: Research Square preprint supplement (doi:10.21203/rs.3.rs-2418923/v1), 2023-01-20
Supplement: Supplementary file 1 [file 83a73716b7a29eecafc5f30a.xlsx]

## Sheet: Figure 2
		NO3- (%)						NO2- (%)						NH4+ (%)						N2O+N2 (%)
	Time (d)	0	1	3	6	10	15	0	1	3	6	10	15	0	1	3	6	10	15	0	1	3	6	10	15
0 mM acetate + No magnetite + NO3-	AVERAGE	100	51.3121	28.9025	20.1246	14.7312	9.48605	0	19.9321	25.4227	32.799	28.027	27.0811	0	1.1616	5.07978	6.13444	8.10467	7.62315	0	27.5942	40.5951	40.942	49.1371	55.8097
	STDEV	0	0.262314	7.9635	2.66876	12.3345	2.24963	0	1.36227	5.98909	12.9318	8.93218	7.0446	0	0.343183	2.16249	3.53962	8.28258	12.3	0	1.2814	0.188071	13.8026	4.8803	3.00574
0.5 mM acetate + No magnetite + NO3-	AVERAGE	100	35.4234	5.03831	3.66734	4.49597	3.9496	0	20.5246	24.7547	25.6971	19.3125	19	0	0.9796	3.45889	4.33622	6.13178	6.18179	0	43.0724	66.7482	66.2993	70.0597	70.8686
	STDEV	0	2.36304	0.310215	2.01582	1.63661	1.59954	0	0.610571	8.59602	1.08492	0.0960445	0.811481	0	0.00395967	0.97015	0.222189	0.0417982	0.368664	0	1.75643	9.25596	2.87855	1.58236	2.77969
5 mM acetate + No magnetite + NO3-	AVERAGE	100	24.8794	0.860202	0	1.0823	0.779274	0	14.9771	0.10395	0.11781	0.074151	0	0	0	0.934222	2.608	4.47156	5.77385	0	60.1435	98.1016	97.2742	94.372	93.4469
	STDEV	0	0.0615867	0	0	0	0	0	1.523	0.0019601	0.0431222	0.00098003	0	0	0	0.255187	0.250788	0.857956	1.70926	0	1.58458	0.253227	0.29391	0.858936	1.70926
0 mM acetate + CM + NO3-	AVERAGE	100	60.9476	16.4924	5.6629	2.62	0.745	0	15.35	24.9688	24.6064	14.1199	6.89396	0	9.10427	20.5202	20.7562	27.962	36.6108	0	14.5982	38.0186	50.9745	55.2981	51.7502
	STDEV	0	1.56818	3.023	1.67881	3.70524	1.05359	0	0.668394	2.60583	2.27752	3.52175	5.06882	0	0.773481	5.47552	2.93245	3.31652	6.6569	0	3.01006	5.05836	3.53116	9.13303	2.67213
0.5 mM acetate + CM + NO3-	AVERAGE	100	35.5081	8.92742	2.47581	3.17742	2.11895	0	29.0256	23.5301	14.1545	8.25709	8.28689	0	9.04173	17.0902	23.1864	24.8073	26.4822	0	26.4246	50.4522	60.1832	63.7582	63.112
	STDEV	0	3.25041	14.9975	9.23801	7.69834	7.32768	0	7.03284	5.50396	8.19028	7.92664	10.5963	0	0.846077	1.13954	2.0041	0.78096	3.55258	0	2.93635	10.6331	0.956366	1.00926	6.8212
5 mM acetate + CM + NO3-	AVERAGE	100	13	2.1	0.9	0	0	0	12.5592	0.108108	0.071379	0.063063	0	0	7.3664	14.4287	17.1976	19.0844	23.8089	0	67.0744	83.3632	81.8311	80.8525	76.1911
	STDEV	0	0.173355	0	0	0	0	0	7.79434	0.0019601	0.0107805	0.0107805	0	0	0.0659966	0.829358	0.868956	4.61536	3.45203	0	8.03369	0.827398	0.879736	4.60458	3.45203
0 mM acetate + HM + NO3-	AVERAGE	100	57.9731	23.6652	0.415161	0.39	1.62859	0	25.0346	35.9279	20.1635	15.0832	5	0	1.63013	8.22044	16.4633	24.5989	26.6963	0	13.1736	34.7293	42.8666	49.5378	52.7674
	STDEV	0	1.91033	12.9731	0	0	0	0	0.103886	9.94163	7.99611	6.90292	0	0	0.340543	4.56697	2.0569	2.80046	5.59699	0	1.67367	1.53546	15.9392	14.1025	5.59699
0.5 mM acetate + HM + NO3-	AVERAGE	100	49.7	15.9	5.31	1.1	1.8	0	24.5488	25.1476	21.0242	7.54537	1.46362	0	1.2512	2.97356	6.21067	8.73689	13.8089	0	24.5	55.9789	67.4551	82.6177	82.9275
	STDEV	0	2.1179	0.195025	1.90577	6.4016	13.6596	0	2.05712	3.9153	6.68198	5.12664	12.3569	0	0.311504	0.59177	0.171592	0.0439978	0.873114	0	0.250729	4.70209	8.75934	11.4842	8.14335
5 mM acetate + HM + NO3-	AVERAGE	100	13.1	2.12	0.6	0	0	0	18.1095	0.076923	0.108108	0.067221	0	0	0	1.22044	4.05622	5.26956	6.86398	0	68.7905	96.5826	95.2357	94.6632	93.136
	STDEV	0	0.00342148	1.71759	0	0	0	0	1.29171	0.00686036	0.00784042	0.00686032	0	0	0	0.413579	0.147393	0.0373977	0.770843	0	1.28828	2.1243	0.139552	0.0305374	0.770843

## Sheet: Figure 3
		NO3- (%)						NO2- (%)						NH4+ (%)						N2O+N2 (%)
	Time (d)	0	1	3	6	10	15	0	1	3	6	10	15	0	1	3	6	10	15	0	1	3	6	10	15
CM + NO3-	AVERAGE	100	89.9	87.2	87.1	86.2	85.9	0	0.01911	0.033852	0.017472	0.03	0.017472	0	11.3864	12.0499	12.1949	11.9	13.1848	0	-1.30554	0.716224	0.687647	1.87	0.897777
	STDEV	0	1.56818	3.023	1.67881	3.70524	1.05359	0	0.068394	0	0	0	0	0	0.773481	0.475521	2.93245	1.31652	0.656904	0	0.010055	0.0583575	0.531159	0.133035	0.672133
CM + NO2-	AVERAGE							100	72.2886	47.591	42.1475	40.11	37.2596	0	12.523	13.1613	12.823	14.12	16.5335	0	15.1885	39.2478	45.0294	45.77	46.2069
	STDEV							0	1.56818	3.023	1.67881	3.70524	1.05359	0	0.668394	2.60583	2.27752	3.52175	5.06882	0	0.773481	5.47552	2.93245	3.31652	6.6569
HM + NO3-	AVERAGE	100	98.2	98.1	97.9	98.15	99.3	0	0.03276	0.020202	0.033852	0.025	0.033852	0	2.11336	2.24113	2.28945	2.26	2.24992	0	-0.346123	-0.361335	-0.223304	-0.435	-1.58377
	STDEV	0	1.91033	2.97313	0	0	0	0	0	0	0	0	0	0	0.340543	0.566967	0.0568955	0.300458	0.596988	0	0	0	0	0	0
HM + NO2-	AVERAGE							100	96.9891	97.2501	95.0247	94.5	93.2	0	2.11336	2.28945	2.24113	2.45	2.74151	0	0.897547	0.460462	2.73419	3.05	4.05849
	STDEV							0	0.262314	1.9635	2.66876	1.33445	2.24963	0	0.362269	0.989086	0.931761	0.932175	0.0445994	0	0.0431826	0.162489	0.539619	0.282577	0.299967

## Sheet: Figure 4
HM pristine		Bio-trated HM in 0 mM acetate		Bio-trated HM in 5 mM acetate		CM pristine		Bio-trated CM in 0 mM acetate		Bio-trated CM in 5 mM acetate
Angle	PSD	Angle	PSD	Angle	PSD	Angle	PSD	Angle	PSD	Angle	PSD
5	1118	5	1324	5	1339	5	1310	5	1320	5	1420
5.02046	1083	5.02558	1319	5.02558	1298	5.02046	1339	5.02558	1332	5.02558	1442
5.04093	1091	5.05116	1376	5.05116	1291	5.04093	1243	5.05116	1316	5.05116	1410
5.06139	1136	5.07674	1345	5.07674	1346	5.06139	1324	5.07674	1360	5.07674	1359
5.08186	1108	5.10232	1317	5.10232	1407	5.08186	1281	5.10232	1316	5.10232	1376
5.10232	1125	5.1279	1281	5.1279	1316	5.10232	1257	5.1279	1313	5.1279	1370
5.12279	1060	5.15348	1364	5.15348	1325	5.12279	1225	5.15348	1355	5.15348	1368
5.14325	1137	5.17906	1342	5.17906	1369	5.14325	1285	5.17906	1359	5.17906	1332
5.16372	1067	5.20464	1323	5.20464	1345	5.16372	1245	5.20464	1339	5.20464	1415
5.18418	1060	5.23023	1284	5.23023	1308	5.18418	1276	5.23023	1331	5.23023	1324
5.20464	1049	5.25581	1366	5.25581	1262	5.20464	1226	5.25581	1329	5.25581	1311
5.22511	1079	5.28139	1295	5.28139	1298	5.22511	1320	5.28139	1277	5.28139	1329
5.24557	1071	5.30697	1343	5.30697	1382	5.24557	1202	5.30697	1371	5.30697	1394
5.26604	1090	5.33255	1338	5.33255	1251	5.26604	1258	5.33255	1332	5.33255	1401
5.2865	1080	5.35813	1292	5.35813	1332	5.2865	1209	5.35813	1297	5.35813	1327
5.30697	1098	5.38371	1227	5.38371	1257	5.30697	1287	5.38371	1253	5.38371	1337
5.32743	1047	5.40929	1174	5.40929	1299	5.32743	1204	5.40929	1339	5.40929	1337
5.3479	1014	5.43487	1317	5.43487	1322	5.3479	1233	5.43487	1312	5.43487	1307
5.36836	1045	5.46045	1173	5.46045	1296	5.36836	1226	5.46045	1233	5.46045	1306
5.38882	1077	5.48603	1274	5.48603	1287	5.38882	1218	5.48603	1203	5.48603	1297
5.40929	1052	5.51161	1339	5.51161	1307	5.40929	1230	5.51161	1262	5.51161	1394
5.42975	1042	5.53719	1254	5.53719	1258	5.42975	1265	5.53719	1311	5.53719	1281
5.45022	940	5.56277	1273	5.56277	1266	5.45022	1226	5.56277	1299	5.56277	1328
5.47068	1023	5.58835	1316	5.58835	1271	5.47068	1176	5.58835	1309	5.58835	1283
5.49115	1001	5.61393	1345	5.61393	1324	5.49115	1202	5.61393	1244	5.61393	1292
5.51161	1015	5.63951	1269	5.63951	1369	5.51161	1171	5.63951	1326	5.63951	1282
5.53208	1073	5.66509	1217	5.66509	1255	5.53208	1282	5.66509	1235	5.66509	1318
5.55254	980	5.69068	1304	5.69068	1226	5.55254	1156	5.69068	1309	5.69068	1349
5.573	1008	5.71626	1256	5.71626	1316	5.573	1208	5.71626	1261	5.71626	1314
5.59347	989	5.74184	1308	5.74184	1285	5.59347	1204	5.74184	1219	5.74184	1378
5.61393	997	5.76742	1256	5.76742	1314	5.61393	1127	5.76742	1250	5.76742	1245
5.6344	1025	5.793	1256	5.793	1262	5.6344	1235	5.793	1260	5.793	1247
5.65486	1014	5.81858	1187	5.81858	1314	5.65486	1223	5.81858	1198	5.81858	1306
5.67533	1006	5.84416	1244	5.84416	1274	5.67533	1191	5.84416	1251	5.84416	1322
5.69579	975	5.86974	1221	5.86974	1206	5.69579	1214	5.86974	1237	5.86974	1292
5.71626	966	5.89532	1210	5.89532	1222	5.71626	1230	5.89532	1286	5.89532	1336
5.73672	995	5.9209	1314	5.9209	1237	5.73672	1143	5.9209	1176	5.9209	1300
5.75718	1023	5.94648	1215	5.94648	1268	5.75718	1126	5.94648	1242	5.94648	1229
5.77765	987	5.97206	1225	5.97206	1204	5.77765	1120	5.97206	1217	5.97206	1271
5.79811	990	5.99764	1215	5.99764	1254	5.79811	1177	5.99764	1202	5.99764	1292
5.81858	1019	6.02322	1207	6.02322	1277	5.81858	1134	6.02322	1273	6.02322	1272
5.83904	980	6.0488	1202	6.0488	1230	5.83904	1173	6.0488	1161	6.0488	1266
5.85951	1026	6.07438	1256	6.07438	1269	5.85951	1124	6.07438	1217	6.07438	1269
5.87997	929	6.09996	1173	6.09996	1252	5.87997	1114	6.09996	1162	6.09996	1194
5.90044	1003	6.12554	1196	6.12554	1258	5.90044	1132	6.12554	1217	6.12554	1290
5.9209	987	6.15113	1254	6.15113	1293	5.9209	1183	6.15113	1193	6.15113	1254
5.94136	928	6.17671	1229	6.17671	1235	5.94136	1164	6.17671	1186	6.17671	1284
5.96183	933	6.20229	1200	6.20229	1279	5.96183	1157	6.20229	1196	6.20229	1310
5.98229	938	6.22787	1237	6.22787	1292	5.98229	1158	6.22787	1220	6.22787	1280
6.00276	921	6.25345	1238	6.25345	1242	6.00276	1176	6.25345	1249	6.25345	1213
6.02322	990	6.27903	1226	6.27903	1210	6.02322	1130	6.27903	1311	6.27903	1287
6.04369	983	6.30461	1200	6.30461	1149	6.04369	1129	6.30461	1170	6.30461	1297
6.06415	850	6.33019	1186	6.33019	1186	6.06415	1109	6.33019	1162	6.33019	1235
6.08462	890	6.35577	1210	6.35577	1245	6.08462	1131	6.35577	1220	6.35577	1197
6.10508	918	6.38135	1191	6.38135	1280	6.10508	1087	6.38135	1155	6.38135	1255
6.12554	868	6.40693	1180	6.40693	1198	6.12554	1090	6.40693	1256	6.40693	1252
6.14601	937	6.43251	1238	6.43251	1194	6.14601	1120	6.43251	1248	6.43251	1285
6.16647	903	6.45809	1140	6.45809	1215	6.16647	1138	6.45809	1150	6.45809	1311
6.18694	925	6.48367	1215	6.48367	1194	6.18694	1095	6.48367	1239	6.48367	1235
6.2074	879	6.50925	1210	6.50925	1202	6.2074	1168	6.50925	1243	6.50925	1273
6.22787	917	6.53483	1211	6.53483	1255	6.22787	1141	6.53483	1166	6.53483	1190
6.24833	968	6.56041	1213	6.56041	1189	6.24833	1157	6.56041	1211	6.56041	1246
6.2688	925	6.58599	1167	6.58599	1183	6.2688	1052	6.58599	1244	6.58599	1268
6.28926	868	6.61158	1217	6.61158	1230	6.28926	1075	6.61158	1221	6.61158	1247
6.30972	860	6.63716	1189	6.63716	1142	6.30972	1089	6.63716	1239	6.63716	1234
6.33019	908	6.66274	1197	6.66274	1246	6.33019	1170	6.66274	1106	6.66274	1247
6.35065	889	6.68832	1204	6.68832	1232	6.35065	1124	6.68832	1140	6.68832	1216
6.37112	923	6.7139	1200	6.7139	1221	6.37112	1123	6.7139	1157	6.7139	1212
6.39158	1003	6.73948	1166	6.73948	1251	6.39158	1135	6.73948	1151	6.73948	1185
6.41205	956	6.76506	1245	6.76506	1211	6.41205	1171	6.76506	1141	6.76506	1208
6.43251	944	6.79064	1174	6.79064	1218	6.43251	1106	6.79064	1154	6.79064	1148
6.45298	911	6.81622	1218	6.81622	1200	6.45298	1141	6.81622	1160	6.81622	1217
6.47344	885	6.8418	1211	6.8418	1157	6.47344	1143	6.8418	1173	6.8418	1195
6.4939	924	6.86738	1160	6.86738	1127	6.4939	1148	6.86738	1128	6.86738	1251
6.51437	891	6.89296	1195	6.89296	1200	6.51437	1119	6.89296	1188	6.89296	1206
6.53483	853	6.91854	1181	6.91854	1161	6.53483	1082	6.91854	1162	6.91854	1170
6.5553	852	6.94412	1197	6.94412	1125	6.5553	1160	6.94412	1187	6.94412	1222
6.57576	882	6.9697	1153	6.9697	1212	6.57576	1113	6.9697	1148	6.9697	1229
6.59623	895	6.99528	1173	6.99528	1215	6.59623	1122	6.99528	1120	6.99528	1223
6.61669	902	7.02086	1189	7.02086	1209	6.61669	1069	7.02086	1131	7.02086	1212
6.63716	907	7.04644	1143	7.04644	1225	6.63716	1129	7.04644	1154	7.04644	1191
6.65762	883	7.07203	1199	7.07203	1200	6.65762	1146	7.07203	1190	7.07203	1230
6.67808	866	7.09761	1201	7.09761	1207	6.67808	1104	7.09761	1223	7.09761	1206
6.69855	899	7.12319	1207	7.12319	1189	6.69855	1086	7.12319	1149	7.12319	1197
6.71901	826	7.14877	1188	7.14877	1181	6.71901	1072	7.14877	1165	7.14877	1211
6.73948	917	7.17435	1185	7.17435	1257	6.73948	1109	7.17435	1088	7.17435	1222
6.75994	817	7.19993	1187	7.19993	1169	6.75994	1028	7.19993	1181	7.19993	1176
6.78041	848	7.22551	1140	7.22551	1211	6.78041	1104	7.22551	1201	7.22551	1170
6.80087	838	7.25109	1151	7.25109	1188	6.80087	1121	7.25109	1170	7.25109	1217
6.82134	844	7.27667	1215	7.27667	1230	6.82134	1092	7.27667	1218	7.27667	1166
6.8418	908	7.30225	1169	7.30225	1183	6.8418	1157	7.30225	1134	7.30225	1186
6.86226	921	7.32783	1182	7.32783	1233	6.86226	1087	7.32783	1130	7.32783	1174
6.88273	856	7.35341	1159	7.35341	1196	6.88273	1101	7.35341	1198	7.35341	1153
6.90319	854	7.37899	1163	7.37899	1193	6.90319	1143	7.37899	1131	7.37899	1232
6.92366	877	7.40457	1173	7.40457	1176	6.92366	1093	7.40457	1230	7.40457	1277
6.94412	865	7.43015	1177	7.43015	1221	6.94412	1038	7.43015	1138	7.43015	1204
6.96459	826	7.45573	1173	7.45573	1204	6.96459	1084	7.45573	1130	7.45573	1199
6.98505	849	7.48131	1163	7.48131	1140	6.98505	1115	7.48131	1130	7.48131	1299
7.00552	846	7.50689	1137	7.50689	1132	7.00552	1060	7.50689	1113	7.50689	1213
7.02598	809	7.53248	1167	7.53248	1182	7.02598	1062	7.53248	1152	7.53248	1195
7.04644	820	7.55806	1211	7.55806	1154	7.04644	1066	7.55806	1088	7.55806	1212
7.06691	863	7.58364	1211	7.58364	1096	7.06691	1078	7.58364	1185	7.58364	1295
7.08737	857	7.60922	1161	7.60922	1186	7.08737	1029	7.60922	1146	7.60922	1174
7.10784	842	7.6348	1167	7.6348	1157	7.10784	1030	7.6348	1176	7.6348	1186
7.1283	749	7.66038	1159	7.66038	1188	7.1283	1034	7.66038	1153	7.66038	1239
7.14877	831	7.68596	1225	7.68596	1181	7.14877	1037	7.68596	1147	7.68596	1174
7.16923	840	7.71154	1192	7.71154	1212	7.16923	1093	7.71154	1227	7.71154	1204
7.1897	893	7.73712	1173	7.73712	1152	7.1897	1062	7.73712	1215	7.73712	1200
7.21016	839	7.7627	1211	7.7627	1142	7.21016	1014	7.7627	1209	7.7627	1193
7.23062	835	7.78828	1114	7.78828	1174	7.23062	1079	7.78828	1126	7.78828	1192
7.25109	845	7.81386	1181	7.81386	1184	7.25109	1050	7.81386	1135	7.81386	1232
7.27155	821	7.83944	1157	7.83944	1169	7.27155	1017	7.83944	1122	7.83944	1206
7.29202	846	7.86502	1216	7.86502	1187	7.29202	1026	7.86502	1170	7.86502	1221
7.31248	859	7.8906	1184	7.8906	1154	7.31248	1090	7.8906	1126	7.8906	1222
7.33295	793	7.91618	1234	7.91618	1160	7.33295	1065	7.91618	1098	7.91618	1163
7.35341	826	7.94176	1230	7.94176	1235	7.35341	1100	7.94176	1144	7.94176	1146
7.37388	814	7.96734	1142	7.96734	1183	7.37388	1066	7.96734	1114	7.96734	1206
7.39434	773	7.99293	1173	7.99293	1193	7.39434	1058	7.99293	1077	7.99293	1225
7.4148	800	8.01851	1155	8.01851	1213	7.4148	1038	8.01851	1129	8.01851	1223
7.43527	794	8.04409	1199	8.04409	1185	7.43527	1074	8.04409	1136	8.04409	1182
7.45573	796	8.06967	1165	8.06967	1112	7.45573	1090	8.06967	1115	8.06967	1238
7.4762	785	8.09525	1193	8.09525	1150	7.4762	998	8.09525	1214	8.09525	1263
7.49666	790	8.12083	1182	8.12083	1227	7.49666	1047	8.12083	1153	8.12083	1228
7.51713	829	8.14641	1153	8.14641	1154	7.51713	1070	8.14641	1162	8.14641	1196
7.53759	801	8.17199	1212	8.17199	1242	7.53759	1069	8.17199	1113	8.17199	1197
7.55806	800	8.19757	1183	8.19757	1175	7.55806	1006	8.19757	1135	8.19757	1193
7.57852	754	8.22315	1100	8.22315	1195	7.57852	1074	8.22315	1193	8.22315	1209
7.59898	763	8.24873	1163	8.24873	1181	7.59898	1020	8.24873	1177	8.24873	1161
7.61945	827	8.27431	1125	8.27431	1138	7.61945	1078	8.27431	1113	8.27431	1176
7.63991	793	8.29989	1115	8.29989	1189	7.63991	1072	8.29989	1095	8.29989	1183
7.66038	831	8.32547	1161	8.32547	1187	7.66038	1066	8.32547	1151	8.32547	1194
7.68084	807	8.35105	1188	8.35105	1186	7.68084	1035	8.35105	1168	8.35105	1168
7.70131	851	8.37663	1097	8.37663	1211	7.70131	1077	8.37663	1126	8.37663	1198
7.72177	778	8.40221	1160	8.40221	1243	7.72177	1051	8.40221	1142	8.40221	1175
7.74224	806	8.42779	1167	8.42779	1240	7.74224	1000	8.42779	1201	8.42779	1203
7.7627	841	8.45338	1193	8.45338	1213	7.7627	1080	8.45338	1120	8.45338	1197
7.78316	781	8.47896	1176	8.47896	1212	7.78316	1110	8.47896	1089	8.47896	1186
7.80363	822	8.50454	1205	8.50454	1195	7.80363	1083	8.50454	1119	8.50454	1159
7.82409	815	8.53012	1143	8.53012	1185	7.82409	1025	8.53012	1192	8.53012	1182
7.84456	806	8.5557	1223	8.5557	1252	7.84456	1018	8.5557	1171	8.5557	1209
7.86502	729	8.58128	1213	8.58128	1246	7.86502	1056	8.58128	1179	8.58128	1232
7.88549	762	8.60686	1156	8.60686	1137	7.88549	1089	8.60686	1129	8.60686	1168
7.90595	784	8.63244	1199	8.63244	1116	7.90595	1054	8.63244	1108	8.63244	1132
7.92642	764	8.65802	1237	8.65802	1166	7.92642	1069	8.65802	1116	8.65802	1202
7.94688	773	8.6836	1175	8.6836	1205	7.94688	1077	8.6836	1172	8.6836	1197
7.96734	739	8.70918	1127	8.70918	1192	7.96734	1023	8.70918	1095	8.70918	1206
7.98781	781	8.73476	1229	8.73476	1204	7.98781	1096	8.73476	1161	8.73476	1158
8.00827	824	8.76034	1198	8.76034	1212	8.00827	1026	8.76034	1153	8.76034	1241
8.02874	859	8.78592	1164	8.78592	1179	8.02874	1073	8.78592	1160	8.78592	1232
8.0492	728	8.8115	1188	8.8115	1195	8.0492	1002	8.8115	1121	8.8115	1223
8.06967	823	8.83708	1230	8.83708	1189	8.06967	1035	8.83708	1167	8.83708	1232
8.09013	782	8.86266	1183	8.86266	1235	8.09013	1052	8.86266	1170	8.86266	1183
8.1106	789	8.88824	1231	8.88824	1181	8.1106	1016	8.88824	1148	8.88824	1193
8.13106	793	8.91383	1179	8.91383	1175	8.13106	1029	8.91383	1133	8.91383	1186
8.15152	728	8.93941	1167	8.93941	1181	8.15152	1061	8.93941	1097	8.93941	1255
8.17199	762	8.96499	1216	8.96499	1174	8.17199	1112	8.96499	1148	8.96499	1235
8.19245	798	8.99057	1166	8.99057	1187	8.19245	1065	8.99057	1067	8.99057	1198
8.21292	756	9.01615	1125	9.01615	1159	8.21292	1068	9.01615	1153	9.01615	1210
8.23338	752	9.04173	1152	9.04173	1256	8.23338	1024	9.04173	1109	9.04173	1264
8.25385	790	9.06731	1200	9.06731	1188	8.25385	1067	9.06731	1106	9.06731	1253
8.27431	718	9.09289	1243	9.09289	1213	8.27431	1039	9.09289	1121	9.09289	1215
8.29478	782	9.11847	1156	9.11847	1196	8.29478	1092	9.11847	1140	9.11847	1195
8.31524	758	9.14405	1128	9.14405	1208	8.31524	1057	9.14405	1135	9.14405	1191
8.3357	803	9.16963	1193	9.16963	1221	8.3357	1022	9.16963	1069	9.16963	1301
8.35617	804	9.19521	1132	9.19521	1227	8.35617	1067	9.19521	1146	9.19521	1178
8.37663	755	9.22079	1181	9.22079	1185	8.37663	1001	9.22079	1117	9.22079	1252
8.3971	774	9.24637	1219	9.24637	1183	8.3971	1031	9.24637	1129	9.24637	1200
8.41756	752	9.27195	1156	9.27195	1136	8.41756	1033	9.27195	1102	9.27195	1199
8.43803	701	9.29753	1189	9.29753	1198	8.43803	1021	9.29753	1192	9.29753	1236
8.45849	768	9.32311	1190	9.32311	1250	8.45849	1036	9.32311	1155	9.32311	1221
8.47896	793	9.34869	1182	9.34869	1186	8.47896	1024	9.34869	1129	9.34869	1180
8.49942	749	9.37428	1196	9.37428	1236	8.49942	1053	9.37428	1259	9.37428	1216
8.51988	812	9.39986	1226	9.39986	1162	8.51988	997	9.39986	1090	9.39986	1208
8.54035	739	9.42544	1180	9.42544	1166	8.54035	1010	9.42544	1108	9.42544	1214
8.56081	761	9.45102	1208	9.45102	1186	8.56081	1050	9.45102	1158	9.45102	1242
8.58128	748	9.4766	1198	9.4766	1193	8.58128	1038	9.4766	1161	9.4766	1183
8.60174	738	9.50218	1235	9.50218	1157	8.60174	1051	9.50218	1195	9.50218	1154
8.62221	739	9.52776	1190	9.52776	1158	8.62221	1046	9.52776	1186	9.52776	1223
8.64267	786	9.55334	1170	9.55334	1194	8.64267	1059	9.55334	1119	9.55334	1228
8.66314	767	9.57892	1199	9.57892	1226	8.66314	1059	9.57892	1241	9.57892	1228
8.6836	737	9.6045	1207	9.6045	1189	8.6836	972	9.6045	1173	9.6045	1216
8.70406	710	9.63008	1197	9.63008	1157	8.70406	994	9.63008	1124	9.63008	1158
8.72453	756	9.65566	1192	9.65566	1142	8.72453	1027	9.65566	1121	9.65566	1195
8.74499	726	9.68124	1187	9.68124	1234	8.74499	1039	9.68124	1146	9.68124	1155
8.76546	771	9.70682	1198	9.70682	1210	8.76546	1041	9.70682	1173	9.70682	1236
8.78592	766	9.7324	1207	9.7324	1157	8.78592	1051	9.7324	1165	9.7324	1129
8.80639	728	9.75798	1210	9.75798	1206	8.80639	1004	9.75798	1159	9.75798	1199
8.82685	756	9.78356	1143	9.78356	1219	8.82685	1070	9.78356	1133	9.78356	1230
8.84732	744	9.80914	1155	9.80914	1225	8.84732	1061	9.80914	1178	9.80914	1182
8.86778	723	9.83473	1164	9.83473	1189	8.86778	1058	9.83473	1099	9.83473	1191
8.88824	707	9.86031	1167	9.86031	1208	8.88824	1002	9.86031	1192	9.86031	1210
8.90871	767	9.88589	1155	9.88589	1188	8.90871	989	9.88589	1199	9.88589	1157
8.92917	717	9.91147	1210	9.91147	1145	8.92917	1032	9.91147	1167	9.91147	1208
8.94964	747	9.93705	1095	9.93705	1206	8.94964	1078	9.93705	1219	9.93705	1274
8.9701	750	9.96263	1188	9.96263	1170	8.9701	1086	9.96263	1140	9.96263	1289
8.99057	760	9.98821	1195	9.98821	1180	8.99057	1033	9.98821	1194	9.98821	1224
9.01103	728	10.0138	1251	10.0138	1244	9.01103	1027	10.0138	1157	10.0138	1228
9.0315	749	10.0394	1170	10.0394	1192	9.0315	1054	10.0394	1158	10.0394	1218
9.05196	769	10.065	1173	10.065	1262	9.05196	1017	10.065	1137	10.065	1156
9.07242	727	10.0905	1227	10.0905	1217	9.07242	1010	10.0905	1083	10.0905	1189
9.09289	753	10.1161	1223	10.1161	1259	9.09289	996	10.1161	1165	10.1161	1258
9.11335	759	10.1417	1198	10.1417	1239	9.11335	1037	10.1417	1204	10.1417	1222
9.13382	716	10.1673	1187	10.1673	1189	9.13382	1039	10.1673	1170	10.1673	1310
9.15428	684	10.1929	1258	10.1929	1227	9.15428	1007	10.1929	1158	10.1929	1213
9.17475	737	10.2184	1160	10.2184	1241	9.17475	1080	10.2184	1167	10.2184	1207
9.19521	721	10.244	1170	10.244	1179	9.19521	1071	10.244	1149	10.244	1208
9.21568	706	10.2696	1172	10.2696	1261	9.21568	1033	10.2696	1164	10.2696	1196
9.23614	775	10.2952	1280	10.2952	1175	9.23614	1001	10.2952	1148	10.2952	1243
9.2566	700	10.3208	1178	10.3208	1239	9.2566	1044	10.3208	1175	10.3208	1210
9.27707	746	10.3463	1176	10.3463	1177	9.27707	991	10.3463	1129	10.3463	1204
9.29753	716	10.3719	1244	10.3719	1252	9.29753	937	10.3719	1161	10.3719	1219
9.318	734	10.3975	1262	10.3975	1269	9.318	988	10.3975	1128	10.3975	1229
9.33846	672	10.4231	1171	10.4231	1275	9.33846	1019	10.4231	1133	10.4231	1219
9.35893	719	10.4487	1195	10.4487	1255	9.35893	971	10.4487	1150	10.4487	1202
9.37939	719	10.4742	1163	10.4742	1222	9.37939	1003	10.4742	1190	10.4742	1183
9.39986	716	10.4998	1260	10.4998	1183	9.39986	1021	10.4998	1152	10.4998	1243
9.42032	738	10.5254	1202	10.5254	1235	9.42032	1032	10.5254	1158	10.5254	1204
9.44078	743	10.551	1216	10.551	1208	9.44078	1010	10.551	1085	10.551	1161
9.46125	696	10.5766	1192	10.5766	1230	9.46125	1033	10.5766	1177	10.5766	1230
9.48171	708	10.6021	1185	10.6021	1202	9.48171	1038	10.6021	1174	10.6021	1268
9.50218	737	10.6277	1189	10.6277	1188	9.50218	1004	10.6277	1214	10.6277	1226
9.52264	763	10.6533	1224	10.6533	1254	9.52264	1023	10.6533	1159	10.6533	1196
9.54311	706	10.6789	1183	10.6789	1248	9.54311	1024	10.6789	1147	10.6789	1219
9.56357	737	10.7045	1169	10.7045	1284	9.56357	1016	10.7045	1117	10.7045	1219
9.58404	753	10.73	1233	10.73	1252	9.58404	1002	10.73	1193	10.73	1204
9.6045	752	10.7556	1204	10.7556	1237	9.6045	1031	10.7556	1144	10.7556	1271
9.62496	734	10.7812	1163	10.7812	1194	9.62496	978	10.7812	1138	10.7812	1278
9.64543	690	10.8068	1232	10.8068	1238	9.64543	1092	10.8068	1212	10.8068	1248
9.66589	684	10.8324	1269	10.8324	1170	9.66589	1019	10.8324	1144	10.8324	1240
9.68636	718	10.8579	1154	10.8579	1227	9.68636	994	10.8579	1208	10.8579	1194
9.70682	699	10.8835	1246	10.8835	1278	9.70682	979	10.8835	1189	10.8835	1172
9.72729	740	10.9091	1206	10.9091	1232	9.72729	1057	10.9091	1171	10.9091	1249
9.74775	709	10.9347	1173	10.9347	1181	9.74775	983	10.9347	1155	10.9347	1196
9.76822	721	10.9603	1245	10.9603	1275	9.76822	1051	10.9603	1111	10.9603	1167
9.78868	726	10.9859	1186	10.9859	1216	9.78868	1021	10.9859	1091	10.9859	1174
9.80914	720	11.0114	1245	11.0114	1155	9.80914	1096	11.0114	1186	11.0114	1303
9.82961	714	11.037	1242	11.037	1245	9.82961	1014	11.037	1172	11.037	1286
9.85007	656	11.0626	1193	11.0626	1245	9.85007	1047	11.0626	1167	11.0626	1262
9.87054	672	11.0882	1282	11.0882	1210	9.87054	996	11.0882	1152	11.0882	1270
9.891	720	11.1138	1187	11.1138	1258	9.891	1078	11.1138	1127	11.1138	1269
9.91147	713	11.1393	1239	11.1393	1199	9.91147	974	11.1393	1160	11.1393	1318
9.93193	679	11.1649	1251	11.1649	1243	9.93193	1042	11.1649	1147	11.1649	1282
9.9524	693	11.1905	1300	11.1905	1221	9.9524	1053	11.1905	1179	11.1905	1197
9.97286	682	11.2161	1211	11.2161	1231	9.97286	1025	11.2161	1209	11.2161	1210
9.99332	703	11.2417	1154	11.2417	1251	9.99332	1088	11.2417	1234	11.2417	1306
10.0138	705	11.2672	1252	11.2672	1242	10.0138	1013	11.2672	1184	11.2672	1236
10.0343	690	11.2928	1275	11.2928	1216	10.0343	1032	11.2928	1157	11.2928	1250
10.0547	729	11.3184	1217	11.3184	1231	10.0547	995	11.3184	1139	11.3184	1285
10.0752	705	11.344	1195	11.344	1230	10.0752	938	11.344	1158	11.344	1235
10.0956	724	11.3696	1172	11.3696	1269	10.0956	1005	11.3696	1163	11.3696	1176
10.1161	708	11.3951	1261	11.3951	1233	10.1161	1075	11.3951	1205	11.3951	1244
10.1366	704	11.4207	1327	11.4207	1191	10.1366	994	11.4207	1220	11.4207	1238
10.157	657	11.4463	1182	11.4463	1223	10.157	1001	11.4463	1177	11.4463	1265
10.1775	699	11.4719	1253	11.4719	1245	10.1775	1019	11.4719	1150	11.4719	1309
10.198	668	11.4975	1246	11.4975	1232	10.198	1048	11.4975	1236	11.4975	1182
10.2184	671	11.523	1189	11.523	1260	10.2184	1039	11.523	1185	11.523	1216
10.2389	719	11.5486	1200	11.5486	1248	10.2389	965	11.5486	1187	11.5486	1311
10.2594	709	11.5742	1235	11.5742	1283	10.2594	1075	11.5742	1186	11.5742	1305
10.2798	686	11.5998	1229	11.5998	1276	10.2798	1029	11.5998	1148	11.5998	1282
10.3003	711	11.6254	1302	11.6254	1214	10.3003	995	11.6254	1160	11.6254	1232
10.3208	677	11.6509	1188	11.6509	1273	10.3208	1054	11.6509	1196	11.6509	1238
10.3412	694	11.6765	1235	11.6765	1251	10.3412	940	11.6765	1172	11.6765	1327
10.3617	737	11.7021	1225	11.7021	1246	10.3617	993	11.7021	1232	11.7021	1255
10.3821	667	11.7277	1235	11.7277	1301	10.3821	1003	11.7277	1170	11.7277	1222
10.4026	637	11.7533	1269	11.7533	1235	10.4026	1002	11.7533	1210	11.7533	1297
10.4231	687	11.7788	1232	11.7788	1235	10.4231	988	11.7788	1157	11.7788	1305
10.4435	723	11.8044	1263	11.8044	1290	10.4435	990	11.8044	1202	11.8044	1285
10.464	671	11.83	1274	11.83	1287	10.464	1021	11.83	1257	11.83	1350
10.4845	658	11.8556	1223	11.8556	1223	10.4845	988	11.8556	1115	11.8556	1293
10.5049	659	11.8812	1242	11.8812	1260	10.5049	1000	11.8812	1187	11.8812	1256
10.5254	671	11.9068	1241	11.9068	1301	10.5254	1039	11.9068	1226	11.9068	1242
10.5459	721	11.9323	1232	11.9323	1313	10.5459	1069	11.9323	1200	11.9323	1183
10.5663	648	11.9579	1248	11.9579	1276	10.5663	1011	11.9579	1202	11.9579	1322
10.5868	659	11.9835	1257	11.9835	1337	10.5868	975	11.9835	1161	11.9835	1279
10.6073	679	12.0091	1245	12.0091	1276	10.6073	1007	12.0091	1212	12.0091	1240
10.6277	672	12.0347	1319	12.0347	1329	10.6277	1033	12.0347	1214	12.0347	1307
10.6482	654	12.0602	1231	12.0602	1326	10.6482	971	12.0602	1158	12.0602	1212
10.6687	703	12.0858	1277	12.0858	1300	10.6687	1005	12.0858	1242	12.0858	1281
10.6891	699	12.1114	1204	12.1114	1340	10.6891	1026	12.1114	1236	12.1114	1210
10.7096	662	12.137	1234	12.137	1285	10.7096	1027	12.137	1145	12.137	1292
10.73	695	12.1626	1335	12.1626	1280	10.73	1018	12.1626	1253	12.1626	1227
10.7505	659	12.1881	1268	12.1881	1307	10.7505	992	12.1881	1186	12.1881	1266
10.771	676	12.2137	1254	12.2137	1315	10.771	971	12.2137	1187	12.2137	1226
10.7914	636	12.2393	1359	12.2393	1285	10.7914	1003	12.2393	1193	12.2393	1196
10.8119	625	12.2649	1294	12.2649	1234	10.8119	1069	12.2649	1234	12.2649	1293
10.8324	622	12.2905	1288	12.2905	1274	10.8324	1014	12.2905	1221	12.2905	1231
10.8528	648	12.316	1247	12.316	1315	10.8528	1005	12.316	1147	12.316	1251
10.8733	716	12.3416	1305	12.3416	1252	10.8733	1031	12.3416	1210	12.3416	1225
10.8938	674	12.3672	1297	12.3672	1298	10.8938	1068	12.3672	1211	12.3672	1343
10.9142	670	12.3928	1277	12.3928	1330	10.9142	1096	12.3928	1259	12.3928	1298
10.9347	636	12.4184	1250	12.4184	1336	10.9347	1091	12.4184	1211	12.4184	1283
10.9552	622	12.4439	1278	12.4439	1327	10.9552	1058	12.4439	1242	12.4439	1253
10.9756	659	12.4695	1267	12.4695	1251	10.9756	991	12.4695	1179	12.4695	1283
10.9961	747	12.4951	1256	12.4951	1238	10.9961	983	12.4951	1189	12.4951	1212
11.0165	645	12.5207	1335	12.5207	1360	11.0165	1021	12.5207	1210	12.5207	1274
11.037	653	12.5463	1315	12.5463	1212	11.037	1007	12.5463	1222	12.5463	1314
11.0575	702	12.5718	1277	12.5718	1296	11.0575	1067	12.5718	1251	12.5718	1324
11.0779	639	12.5974	1325	12.5974	1303	11.0779	1003	12.5974	1282	12.5974	1319
11.0984	652	12.623	1275	12.623	1363	11.0984	1016	12.623	1225	12.623	1293
11.1189	728	12.6486	1321	12.6486	1263	11.1189	960	12.6486	1209	12.6486	1312
11.1393	680	12.6742	1325	12.6742	1342	11.1393	1046	12.6742	1180	12.6742	1302
11.1598	653	12.6997	1306	12.6997	1315	11.1598	1058	12.6997	1244	12.6997	1294
11.1803	682	12.7253	1322	12.7253	1280	11.1803	998	12.7253	1228	12.7253	1241
11.2007	673	12.7509	1302	12.7509	1279	11.2007	1015	12.7509	1196	12.7509	1276
11.2212	639	12.7765	1252	12.7765	1337	11.2212	1001	12.7765	1284	12.7765	1213
11.2417	669	12.8021	1295	12.8021	1293	11.2417	981	12.8021	1276	12.8021	1279
11.2621	651	12.8277	1272	12.8277	1239	11.2621	1077	12.8277	1163	12.8277	1277
11.2826	708	12.8532	1308	12.8532	1335	11.2826	980	12.8532	1237	12.8532	1308
11.303	639	12.8788	1317	12.8788	1323	11.303	1020	12.8788	1210	12.8788	1291
11.3235	666	12.9044	1292	12.9044	1274	11.3235	1040	12.9044	1174	12.9044	1292
11.344	672	12.93	1316	12.93	1298	11.344	1059	12.93	1220	12.93	1280
11.3644	685	12.9556	1347	12.9556	1338	11.3644	1014	12.9556	1198	12.9556	1281
11.3849	633	12.9811	1319	12.9811	1290	11.3849	1069	12.9811	1098	12.9811	1301
11.4054	663	13.0067	1305	13.0067	1315	11.4054	1062	13.0067	1291	13.0067	1284
11.4258	678	13.0323	1314	13.0323	1334	11.4258	1002	13.0323	1188	13.0323	1319
11.4463	658	13.0579	1336	13.0579	1245	11.4463	1053	13.0579	1243	13.0579	1326
11.4668	620	13.0835	1270	13.0835	1357	11.4668	1060	13.0835	1258	13.0835	1306
11.4872	709	13.109	1265	13.109	1352	11.4872	1060	13.109	1196	13.109	1342
11.5077	646	13.1346	1276	13.1346	1378	11.5077	1030	13.1346	1201	13.1346	1249
11.5282	668	13.1602	1293	13.1602	1285	11.5282	1018	13.1602	1280	13.1602	1285
11.5486	709	13.1858	1356	13.1858	1366	11.5486	1052	13.1858	1232	13.1858	1242
11.5691	636	13.2114	1325	13.2114	1370	11.5691	975	13.2114	1260	13.2114	1344
11.5896	665	13.2369	1282	13.2369	1328	11.5896	1041	13.2369	1210	13.2369	1276
11.61	581	13.2625	1275	13.2625	1309	11.61	1015	13.2625	1226	13.2625	1257
11.6305	617	13.2881	1351	13.2881	1293	11.6305	1092	13.2881	1229	13.2881	1383
11.6509	654	13.3137	1299	13.3137	1327	11.6509	1075	13.3137	1151	13.3137	1300
11.6714	635	13.3393	1282	13.3393	1331	11.6714	1030	13.3393	1263	13.3393	1306
11.6919	677	13.3648	1310	13.3648	1315	11.6919	934	13.3648	1239	13.3648	1279
11.7123	677	13.3904	1353	13.3904	1309	11.7123	1058	13.3904	1277	13.3904	1309
11.7328	636	13.416	1315	13.416	1309	11.7328	1003	13.416	1252	13.416	1236
11.7533	631	13.4416	1317	13.4416	1285	11.7533	1026	13.4416	1228	13.4416	1324
11.7737	644	13.4672	1367	13.4672	1383	11.7737	1038	13.4672	1250	13.4672	1317
11.7942	684	13.4927	1267	13.4927	1275	11.7942	1060	13.4927	1211	13.4927	1282
11.8147	689	13.5183	1324	13.5183	1405	11.8147	1029	13.5183	1254	13.5183	1273
11.8351	665	13.5439	1361	13.5439	1386	11.8351	998	13.5439	1254	13.5439	1369
11.8556	660	13.5695	1407	13.5695	1386	11.8556	1019	13.5695	1196	13.5695	1390
11.8761	682	13.5951	1283	13.5951	1364	11.8761	978	13.5951	1223	13.5951	1332
11.8965	628	13.6206	1327	13.6206	1319	11.8965	1055	13.6206	1224	13.6206	1346
11.917	646	13.6462	1341	13.6462	1361	11.917	1023	13.6462	1201	13.6462	1334
11.9374	600	13.6718	1320	13.6718	1388	11.9374	1062	13.6718	1240	13.6718	1434
11.9579	627	13.6974	1346	13.6974	1397	11.9579	967	13.6974	1244	13.6974	1308
11.9784	614	13.723	1360	13.723	1335	11.9784	1016	13.723	1294	13.723	1349
11.9988	610	13.7486	1389	13.7486	1407	11.9988	1018	13.7486	1258	13.7486	1385
12.0193	636	13.7741	1403	13.7741	1414	12.0193	1019	13.7741	1289	13.7741	1235
12.0398	626	13.7997	1314	13.7997	1365	12.0398	1085	13.7997	1292	13.7997	1295
12.0602	634	13.8253	1395	13.8253	1381	12.0602	1022	13.8253	1277	13.8253	1363
12.0807	632	13.8509	1361	13.8509	1305	12.0807	985	13.8509	1342	13.8509	1331
12.1012	658	13.8765	1350	13.8765	1382	12.1012	1028	13.8765	1226	13.8765	1347
12.1216	706	13.902	1346	13.902	1414	12.1216	1082	13.902	1275	13.902	1391
12.1421	581	13.9276	1334	13.9276	1394	12.1421	1028	13.9276	1273	13.9276	1303
12.1626	611	13.9532	1343	13.9532	1408	12.1626	1067	13.9532	1221	13.9532	1357
12.183	634	13.9788	1367	13.9788	1320	12.183	1085	13.9788	1285	13.9788	1325
12.2035	639	14.0044	1371	14.0044	1326	12.2035	1028	14.0044	1240	14.0044	1271
12.2239	693	14.0299	1378	14.0299	1353	12.2239	1040	14.0299	1290	14.0299	1350
12.2444	592	14.0555	1355	14.0555	1378	12.2444	1034	14.0555	1279	14.0555	1319
12.2649	616	14.0811	1343	14.0811	1334	12.2649	1027	14.0811	1276	14.0811	1283
12.2853	646	14.1067	1338	14.1067	1379	12.2853	1023	14.1067	1252	14.1067	1302
12.3058	633	14.1323	1304	14.1323	1385	12.3058	1066	14.1323	1242	14.1323	1346
12.3263	649	14.1578	1355	14.1578	1369	12.3263	977	14.1578	1278	14.1578	1354
12.3467	652	14.1834	1401	14.1834	1420	12.3467	1051	14.1834	1245	14.1834	1372
12.3672	641	14.209	1393	14.209	1334	12.3672	997	14.209	1228	14.209	1281
12.3877	624	14.2346	1409	14.2346	1448	12.3877	1038	14.2346	1217	14.2346	1388
12.4081	664	14.2602	1358	14.2602	1360	12.4081	1069	14.2602	1337	14.2602	1359
12.4286	617	14.2857	1355	14.2857	1400	12.4286	1029	14.2857	1281	14.2857	1378
12.4491	670	14.3113	1338	14.3113	1392	12.4491	1043	14.3113	1275	14.3113	1387
12.4695	603	14.3369	1369	14.3369	1443	12.4695	1028	14.3369	1338	14.3369	1367
12.49	687	14.3625	1390	14.3625	1375	12.49	980	14.3625	1259	14.3625	1327
12.5105	631	14.3881	1394	14.3881	1426	12.5105	1053	14.3881	1273	14.3881	1350
12.5309	588	14.4136	1408	14.4136	1363	12.5309	1053	14.4136	1253	14.4136	1408
12.5514	632	14.4392	1436	14.4392	1404	12.5514	990	14.4392	1326	14.4392	1343
12.5718	605	14.4648	1330	14.4648	1389	12.5718	1054	14.4648	1286	14.4648	1343
12.5923	613	14.4904	1443	14.4904	1431	12.5923	1009	14.4904	1338	14.4904	1315
12.6128	658	14.516	1362	14.516	1401	12.6128	1028	14.516	1267	14.516	1382
12.6332	661	14.5415	1392	14.5415	1433	12.6332	1019	14.5415	1264	14.5415	1300
12.6537	653	14.5671	1387	14.5671	1396	12.6537	1029	14.5671	1300	14.5671	1438
12.6742	645	14.5927	1350	14.5927	1406	12.6742	1031	14.5927	1337	14.5927	1396
12.6946	670	14.6183	1339	14.6183	1400	12.6946	1060	14.6183	1296	14.6183	1362
12.7151	676	14.6439	1387	14.6439	1390	12.7151	1092	14.6439	1299	14.6439	1430
12.7356	641	14.6695	1376	14.6695	1420	12.7356	1045	14.6695	1293	14.6695	1351
12.756	676	14.695	1372	14.695	1435	12.756	1008	14.695	1291	14.695	1366
12.7765	638	14.7206	1314	14.7206	1407	12.7765	1029	14.7206	1314	14.7206	1326
12.797	605	14.7462	1419	14.7462	1437	12.797	1138	14.7462	1260	14.7462	1405
12.8174	652	14.7718	1428	14.7718	1441	12.8174	1061	14.7718	1258	14.7718	1368
12.8379	661	14.7974	1386	14.7974	1387	12.8379	1062	14.7974	1220	14.7974	1336
12.8583	604	14.8229	1458	14.8229	1442	12.8583	1058	14.8229	1289	14.8229	1380
12.8788	642	14.8485	1371	14.8485	1393	12.8788	1092	14.8485	1277	14.8485	1329
12.8993	642	14.8741	1380	14.8741	1463	12.8993	1047	14.8741	1304	14.8741	1420
12.9197	663	14.8997	1412	14.8997	1347	12.9197	1064	14.8997	1298	14.8997	1409
12.9402	636	14.9253	1450	14.9253	1435	12.9402	1015	14.9253	1267	14.9253	1312
12.9607	617	14.9508	1423	14.9508	1422	12.9607	1071	14.9508	1306	14.9508	1381
12.9811	620	14.9764	1359	14.9764	1452	12.9811	1059	14.9764	1272	14.9764	1365
13.0016	609	15.002	1445	15.002	1374	13.0016	1042	15.002	1364	15.002	1406
13.0221	634	15.0276	1462	15.0276	1475	13.0221	1101	15.0276	1285	15.0276	1398
13.0425	585	15.0532	1490	15.0532	1427	13.0425	1008	15.0532	1279	15.0532	1429
13.063	586	15.0787	1413	15.0787	1449	13.063	1034	15.0787	1316	15.0787	1411
13.0835	676	15.1043	1386	15.1043	1425	13.0835	1063	15.1043	1382	15.1043	1373
13.1039	579	15.1299	1462	15.1299	1349	13.1039	1025	15.1299	1328	15.1299	1401
13.1244	637	15.1555	1414	15.1555	1467	13.1244	1110	15.1555	1291	15.1555	1414
13.1448	645	15.1811	1400	15.1811	1446	13.1448	1053	15.1811	1323	15.1811	1395
13.1653	646	15.2066	1417	15.2066	1421	13.1653	1044	15.2066	1342	15.2066	1478
13.1858	624	15.2322	1472	15.2322	1445	13.1858	1017	15.2322	1371	15.2322	1343
13.2062	611	15.2578	1381	15.2578	1486	13.2062	1060	15.2578	1309	15.2578	1377
13.2267	661	15.2834	1423	15.2834	1419	13.2267	1087	15.2834	1376	15.2834	1397
13.2472	632	15.309	1467	15.309	1424	13.2472	999	15.309	1316	15.309	1412
13.2676	636	15.3345	1439	15.3345	1466	13.2676	1012	15.3345	1389	15.3345	1384
13.2881	609	15.3601	1470	15.3601	1396	13.2881	1078	15.3601	1379	15.3601	1399
13.3086	626	15.3857	1420	15.3857	1454	13.3086	1037	15.3857	1273	15.3857	1416
13.329	669	15.4113	1375	15.4113	1452	13.329	1074	15.4113	1343	15.4113	1407
13.3495	626	15.4369	1423	15.4369	1459	13.3495	1029	15.4369	1305	15.4369	1364
13.37	683	15.4624	1425	15.4624	1399	13.37	1042	15.4624	1309	15.4624	1429
13.3904	631	15.488	1436	15.488	1414	13.3904	998	15.488	1342	15.488	1394
13.4109	632	15.5136	1453	15.5136	1419	13.4109	1056	15.5136	1341	15.5136	1418
13.4314	635	15.5392	1405	15.5392	1457	13.4314	1086	15.5392	1345	15.5392	1347
13.4518	641	15.5648	1394	15.5648	1423	13.4518	1070	15.5648	1365	15.5648	1410
13.4723	632	15.5904	1410	15.5904	1518	13.4723	1053	15.5904	1406	15.5904	1416
13.4927	634	15.6159	1461	15.6159	1449	13.4927	1109	15.6159	1387	15.6159	1389
13.5132	638	15.6415	1487	15.6415	1494	13.5132	1020	15.6415	1305	15.6415	1417
13.5337	606	15.6671	1408	15.6671	1490	13.5337	1076	15.6671	1296	15.6671	1382
13.5541	651	15.6927	1475	15.6927	1396	13.5541	1089	15.6927	1331	15.6927	1429
13.5746	632	15.7183	1438	15.7183	1392	13.5746	1050	15.7183	1340	15.7183	1449
13.5951	631	15.7438	1465	15.7438	1540	13.5951	1061	15.7438	1349	15.7438	1410
13.6155	609	15.7694	1435	15.7694	1408	13.6155	1104	15.7694	1329	15.7694	1367
13.636	637	15.795	1476	15.795	1487	13.636	1067	15.795	1395	15.795	1369
13.6565	630	15.8206	1449	15.8206	1565	13.6565	1092	15.8206	1326	15.8206	1414
13.6769	604	15.8462	1496	15.8462	1441	13.6769	1066	15.8462	1328	15.8462	1568
13.6974	641	15.8717	1441	15.8717	1516	13.6974	1040	15.8717	1402	15.8717	1418
13.7179	616	15.8973	1465	15.8973	1523	13.7179	1108	15.8973	1325	15.8973	1438
13.7383	650	15.9229	1399	15.9229	1508	13.7383	1038	15.9229	1311	15.9229	1467
13.7588	606	15.9485	1506	15.9485	1531	13.7588	1051	15.9485	1414	15.9485	1424
13.7792	654	15.9741	1503	15.9741	1450	13.7792	1025	15.9741	1348	15.9741	1482
13.7997	631	15.9996	1438	15.9996	1416	13.7997	1045	15.9996	1426	15.9996	1476
13.8202	616	16.0252	1525	16.0252	1490	13.8202	1086	16.0252	1334	16.0252	1466
13.8406	657	16.0508	1399	16.0508	1437	13.8406	1125	16.0508	1316	16.0508	1402
13.8611	660	16.0764	1456	16.0764	1512	13.8611	1029	16.0764	1337	16.0764	1468
13.8816	604	16.102	1438	16.102	1466	13.8816	1096	16.102	1383	16.102	1489
13.902	655	16.1275	1413	16.1275	1437	13.902	1032	16.1275	1425	16.1275	1418
13.9225	653	16.1531	1436	16.1531	1460	13.9225	1128	16.1531	1296	16.1531	1490
13.943	694	16.1787	1519	16.1787	1487	13.943	1036	16.1787	1287	16.1787	1476
13.9634	616	16.2043	1530	16.2043	1444	13.9634	1052	16.2043	1423	16.2043	1472
13.9839	660	16.2299	1517	16.2299	1525	13.9839	1082	16.2299	1353	16.2299	1488
14.0044	653	16.2554	1494	16.2554	1459	14.0044	1012	16.2554	1351	16.2554	1420
14.0248	602	16.281	1456	16.281	1470	14.0248	1121	16.281	1517	16.281	1446
14.0453	619	16.3066	1462	16.3066	1487	14.0453	1107	16.3066	1353	16.3066	1420
14.0657	619	16.3322	1497	16.3322	1536	14.0657	1024	16.3322	1420	16.3322	1407
14.0862	646	16.3578	1482	16.3578	1507	14.0862	1097	16.3578	1404	16.3578	1483
14.1067	665	16.3833	1510	16.3833	1527	14.1067	1073	16.3833	1408	16.3833	1435
14.1271	650	16.4089	1510	16.4089	1523	14.1271	1099	16.4089	1451	16.4089	1516
14.1476	645	16.4345	1550	16.4345	1558	14.1476	1096	16.4345	1376	16.4345	1520
14.1681	599	16.4601	1508	16.4601	1491	14.1681	1075	16.4601	1371	16.4601	1571
14.1885	658	16.4857	1532	16.4857	1467	14.1885	1073	16.4857	1407	16.4857	1430
14.209	629	16.5113	1503	16.5113	1477	14.209	1096	16.5113	1355	16.5113	1477
14.2295	601	16.5368	1470	16.5368	1517	14.2295	1112	16.5368	1321	16.5368	1496
14.2499	634	16.5624	1524	16.5624	1541	14.2499	1083	16.5624	1405	16.5624	1447
14.2704	647	16.588	1475	16.588	1531	14.2704	1028	16.588	1418	16.588	1483
14.2909	688	16.6136	1536	16.6136	1486	14.2909	1050	16.6136	1407	16.6136	1442
14.3113	664	16.6392	1529	16.6392	1466	14.3113	1137	16.6392	1404	16.6392	1395
14.3318	655	16.6647	1525	16.6647	1539	14.3318	1130	16.6647	1387	16.6647	1421
14.3523	671	16.6903	1522	16.6903	1575	14.3523	1078	16.6903	1344	16.6903	1522
14.3727	686	16.7159	1552	16.7159	1571	14.3727	1107	16.7159	1355	16.7159	1514
14.3932	652	16.7415	1557	16.7415	1448	14.3932	1039	16.7415	1438	16.7415	1466
14.4136	619	16.7671	1468	16.7671	1499	14.4136	1102	16.7671	1427	16.7671	1489
14.4341	691	16.7926	1528	16.7926	1492	14.4341	1108	16.7926	1442	16.7926	1526
14.4546	641	16.8182	1556	16.8182	1546	14.4546	1135	16.8182	1405	16.8182	1468
14.475	652	16.8438	1526	16.8438	1518	14.475	1055	16.8438	1394	16.8438	1464
14.4955	644	16.8694	1496	16.8694	1516	14.4955	1082	16.8694	1390	16.8694	1497
14.516	599	16.895	1507	16.895	1598	14.516	1073	16.895	1385	16.895	1396
14.5364	656	16.9205	1562	16.9205	1489	14.5364	1094	16.9205	1416	16.9205	1467
14.5569	619	16.9461	1627	16.9461	1521	14.5569	1122	16.9461	1371	16.9461	1527
14.5774	695	16.9717	1510	16.9717	1509	14.5774	1179	16.9717	1439	16.9717	1444
14.5978	709	16.9973	1633	16.9973	1558	14.5978	1126	16.9973	1392	16.9973	1512
14.6183	646	17.0229	1622	17.0229	1606	14.6183	1131	17.0229	1463	17.0229	1471
14.6388	663	17.0484	1626	17.0484	1551	14.6388	1147	17.0484	1420	17.0484	1523
14.6592	655	17.074	1534	17.074	1545	14.6592	1184	17.074	1451	17.074	1506
14.6797	646	17.0996	1543	17.0996	1588	14.6797	1065	17.0996	1478	17.0996	1465
14.7001	672	17.1252	1631	17.1252	1539	14.7001	1099	17.1252	1464	17.1252	1461
14.7206	684	17.1508	1520	17.1508	1527	14.7206	1119	17.1508	1365	17.1508	1410
14.7411	669	17.1763	1592	17.1763	1531	14.7411	1197	17.1763	1432	17.1763	1450
14.7615	644	17.2019	1569	17.2019	1507	14.7615	1147	17.2019	1467	17.2019	1498
14.782	675	17.2275	1533	17.2275	1656	14.782	1164	17.2275	1410	17.2275	1479
14.8025	668	17.2531	1607	17.2531	1496	14.8025	1096	17.2531	1467	17.2531	1564
14.8229	661	17.2787	1487	17.2787	1536	14.8229	1110	17.2787	1417	17.2787	1461
14.8434	649	17.3042	1591	17.3042	1519	14.8434	1107	17.3042	1425	17.3042	1522
14.8639	674	17.3298	1572	17.3298	1588	14.8639	1156	17.3298	1451	17.3298	1494
14.8843	731	17.3554	1556	17.3554	1599	14.8843	1124	17.3554	1406	17.3554	1535
14.9048	680	17.381	1562	17.381	1572	14.9048	1175	17.381	1435	17.381	1446
14.9253	692	17.4066	1610	17.4066	1591	14.9253	1165	17.4066	1476	17.4066	1543
14.9457	685	17.4322	1584	17.4322	1567	14.9457	1150	17.4322	1373	17.4322	1467
14.9662	638	17.4577	1607	17.4577	1581	14.9662	1105	17.4577	1444	17.4577	1533
14.9866	704	17.4833	1592	17.4833	1612	14.9866	1162	17.4833	1457	17.4833	1539
15.0071	637	17.5089	1527	17.5089	1542	15.0071	1085	17.5089	1399	17.5089	1535
15.0276	662	17.5345	1599	17.5345	1575	15.0276	1146	17.5345	1451	17.5345	1487
15.048	687	17.5601	1620	17.5601	1629	15.048	1146	17.5601	1517	17.5601	1518
15.0685	665	17.5856	1545	17.5856	1546	15.0685	1061	17.5856	1471	17.5856	1574
15.089	647	17.6112	1509	17.6112	1622	15.089	1084	17.6112	1474	17.6112	1543
15.1094	654	17.6368	1599	17.6368	1615	15.1094	1178	17.6368	1389	17.6368	1527
15.1299	672	17.6624	1617	17.6624	1476	15.1299	1163	17.6624	1432	17.6624	1582
15.1504	635	17.688	1582	17.688	1574	15.1504	1154	17.688	1400	17.688	1531
15.1708	671	17.7135	1560	17.7135	1583	15.1708	1116	17.7135	1491	17.7135	1487
15.1913	657	17.7391	1619	17.7391	1546	15.1913	1163	17.7391	1450	17.7391	1489
15.2118	651	17.7647	1578	17.7647	1642	15.2118	1092	17.7647	1490	17.7647	1511
15.2322	664	17.7903	1576	17.7903	1610	15.2322	1116	17.7903	1473	17.7903	1579
15.2527	644	17.8159	1637	17.8159	1539	15.2527	1216	17.8159	1427	17.8159	1536
15.2732	665	17.8414	1603	17.8414	1595	15.2732	1211	17.8414	1462	17.8414	1555
15.2936	658	17.867	1546	17.867	1579	15.2936	1096	17.867	1524	17.867	1497
15.3141	686	17.8926	1586	17.8926	1662	15.3141	1076	17.8926	1508	17.8926	1510
15.3345	650	17.9182	1578	17.9182	1671	15.3345	1140	17.9182	1478	17.9182	1566
15.355	675	17.9438	1640	17.9438	1594	15.355	1080	17.9438	1467	17.9438	1570
15.3755	616	17.9693	1624	17.9693	1648	15.3755	1118	17.9693	1474	17.9693	1574
15.3959	712	17.9949	1599	17.9949	1569	15.3959	1134	17.9949	1478	17.9949	1563
15.4164	593	18.0205	1637	18.0205	1570	15.4164	1160	18.0205	1478	18.0205	1534
15.4369	675	18.0461	1618	18.0461	1570	15.4369	1117	18.0461	1486	18.0461	1559
15.4573	679	18.0717	1618	18.0717	1654	15.4573	1118	18.0717	1579	18.0717	1632
15.4778	660	18.0972	1675	18.0972	1661	15.4778	1128	18.0972	1465	18.0972	1552
15.4983	676	18.1228	1608	18.1228	1727	15.4983	1135	18.1228	1539	18.1228	1489
15.5187	693	18.1484	1605	18.1484	1693	15.5187	1129	18.1484	1565	18.1484	1564
15.5392	628	18.174	1669	18.174	1717	15.5392	1173	18.174	1533	18.174	1599
15.5597	639	18.1996	1707	18.1996	1682	15.5597	1135	18.1996	1532	18.1996	1606
15.5801	651	18.2251	1760	18.2251	1717	15.5801	1091	18.2251	1457	18.2251	1612
15.6006	649	18.2507	1764	18.2507	1797	15.6006	1141	18.2507	1560	18.2507	1570
15.621	666	18.2763	1777	18.2763	1819	15.621	1150	18.2763	1523	18.2763	1687
15.6415	609	18.3019	1771	18.3019	1834	15.6415	1164	18.3019	1522	18.3019	1597
15.662	660	18.3275	1834	18.3275	1761	15.662	1124	18.3275	1517	18.3275	1635
15.6824	635	18.3531	1796	18.3531	1774	15.6824	1148	18.3531	1507	18.3531	1604
15.7029	625	18.3786	1911	18.3786	1723	15.7029	1110	18.3786	1489	18.3786	1551
15.7234	562	18.4042	1831	18.4042	1665	15.7234	1116	18.4042	1564	18.4042	1592
15.7438	631	18.4298	1713	18.4298	1634	15.7438	1117	18.4298	1457	18.4298	1531
15.7643	664	18.4554	1741	18.4554	1679	15.7643	1115	18.4554	1492	18.4554	1595
15.7848	640	18.481	1618	18.481	1647	15.7848	1172	18.481	1516	18.481	1654
15.8052	658	18.5065	1620	18.5065	1673	15.8052	1148	18.5065	1591	18.5065	1585
15.8257	701	18.5321	1736	18.5321	1614	15.8257	1135	18.5321	1424	18.5321	1551
15.8462	711	18.5577	1619	18.5577	1659	15.8462	1175	18.5577	1441	18.5577	1642
15.8666	682	18.5833	1686	18.5833	1650	15.8666	1196	18.5833	1491	18.5833	1620
15.8871	695	18.6089	1647	18.6089	1575	15.8871	1205	18.6089	1511	18.6089	1608
15.9075	660	18.6344	1678	18.6344	1752	15.9075	1246	18.6344	1552	18.6344	1595
15.928	642	18.66	1612	18.66	1623	15.928	1226	18.66	1539	18.66	1657
15.9485	664	18.6856	1619	18.6856	1631	15.9485	1178	18.6856	1513	18.6856	1658
15.9689	657	18.7112	1626	18.7112	1672	15.9689	1186	18.7112	1568	18.7112	1537
15.9894	680	18.7368	1665	18.7368	1688	15.9894	1180	18.7368	1533	18.7368	1557
16.0099	674	18.7623	1599	18.7623	1691	16.0099	1164	18.7623	1490	18.7623	1612
16.0303	695	18.7879	1652	18.7879	1664	16.0303	1088	18.7879	1517	18.7879	1639
16.0508	657	18.8135	1668	18.8135	1722	16.0508	1153	18.8135	1543	18.8135	1595
16.0713	675	18.8391	1660	18.8391	1700	16.0713	1172	18.8391	1564	18.8391	1550
16.0917	600	18.8647	1627	18.8647	1634	16.0917	1108	18.8647	1486	18.8647	1592
16.1122	657	18.8902	1659	18.8902	1652	16.1122	1143	18.8902	1523	18.8902	1581
16.1327	678	18.9158	1670	18.9158	1626	16.1327	1186	18.9158	1455	18.9158	1591
16.1531	687	18.9414	1643	18.9414	1635	16.1531	1160	18.9414	1532	18.9414	1583
16.1736	671	18.967	1658	18.967	1639	16.1736	1237	18.967	1485	18.967	1594
16.1941	691	18.9926	1661	18.9926	1644	16.1941	1154	18.9926	1543	18.9926	1677
16.2145	722	19.0181	1680	19.0181	1666	16.2145	1165	19.0181	1567	19.0181	1592
16.235	656	19.0437	1679	19.0437	1755	16.235	1155	19.0437	1504	19.0437	1634
16.2554	631	19.0693	1705	19.0693	1654	16.2554	1130	19.0693	1475	19.0693	1659
16.2759	682	19.0949	1708	19.0949	1558	16.2759	1190	19.0949	1478	19.0949	1566
16.2964	672	19.1205	1697	19.1205	1738	16.2964	1120	19.1205	1527	19.1205	1647
16.3168	648	19.146	1725	19.146	1615	16.3168	1197	19.146	1509	19.146	1608
16.3373	664	19.1716	1580	19.1716	1657	16.3373	1104	19.1716	1454	19.1716	1618
16.3578	665	19.1972	1636	19.1972	1620	16.3578	1171	19.1972	1490	19.1972	1657
16.3782	668	19.2228	1698	19.2228	1686	16.3782	1146	19.2228	1535	19.2228	1611
16.3987	656	19.2484	1675	19.2484	1612	16.3987	1114	19.2484	1493	19.2484	1575
16.4192	635	19.274	1659	19.274	1752	16.4192	1254	19.274	1565	19.274	1592
16.4396	672	19.2995	1661	19.2995	1732	16.4396	1194	19.2995	1575	19.2995	1581
16.4601	673	19.3251	1694	19.3251	1659	16.4601	1115	19.3251	1538	19.3251	1618
16.4806	656	19.3507	1735	19.3507	1625	16.4806	1215	19.3507	1592	19.3507	1668
16.501	663	19.3763	1684	19.3763	1728	16.501	1173	19.3763	1570	19.3763	1534
16.5215	681	19.4019	1746	19.4019	1691	16.5215	1213	19.4019	1556	19.4019	1580
16.5419	685	19.4274	1767	19.4274	1718	16.5419	1163	19.4274	1526	19.4274	1566
16.5624	657	19.453	1785	19.453	1749	16.5624	1212	19.453	1509	19.453	1657
16.5829	666	19.4786	1707	19.4786	1686	16.5829	1152	19.4786	1543	19.4786	1620
16.6033	714	19.5042	1775	19.5042	1693	16.6033	1207	19.5042	1486	19.5042	1550
16.6238	626	19.5298	1732	19.5298	1652	16.6238	1184	19.5298	1459	19.5298	1586
16.6443	639	19.5553	1707	19.5553	1686	16.6443	1228	19.5553	1602	19.5553	1628
16.6647	673	19.5809	1776	19.5809	1732	16.6647	1188	19.5809	1548	19.5809	1559
16.6852	656	19.6065	1688	19.6065	1657	16.6852	1173	19.6065	1542	19.6065	1509
16.7057	659	19.6321	1759	19.6321	1726	16.7057	1178	19.6321	1534	19.6321	1617
16.7261	685	19.6577	1691	19.6577	1727	16.7261	1179	19.6577	1558	19.6577	1685
16.7466	660	19.6832	1708	19.6832	1661	16.7466	1187	19.6832	1620	19.6832	1701
16.7671	643	19.7088	1801	19.7088	1670	16.7671	1149	19.7088	1516	19.7088	1556
16.7875	674	19.7344	1713	19.7344	1655	16.7875	1201	19.7344	1518	19.7344	1579
16.808	674	19.76	1658	19.76	1778	16.808	1180	19.76	1569	19.76	1579
16.8284	651	19.7856	1696	19.7856	1778	16.8284	1177	19.7856	1603	19.7856	1583
16.8489	639	19.8111	1639	19.8111	1681	16.8489	1258	19.8111	1534	19.8111	1629
16.8694	669	19.8367	1697	19.8367	1756	16.8694	1174	19.8367	1540	19.8367	1623
16.8898	633	19.8623	1688	19.8623	1688	16.8898	1270	19.8623	1522	19.8623	1647
16.9103	671	19.8879	1710	19.8879	1673	16.9103	1178	19.8879	1576	19.8879	1566
16.9308	621	19.9135	1704	19.9135	1688	16.9308	1202	19.9135	1577	19.9135	1622
16.9512	693	19.939	1712	19.939	1695	16.9512	1202	19.939	1606	19.939	1617
16.9717	678	19.9646	1687	19.9646	1630	16.9717	1173	19.9646	1589	19.9646	1655
16.9922	625	19.9902	1634	19.9902	1720	16.9922	1166	19.9902	1539	19.9902	1590
17.0126	680	20.0158	1677	20.0158	1760	17.0126	1172	20.0158	1605	20.0158	1577
17.0331	715	20.0414	1715	20.0414	1695	17.0331	1181	20.0414	1506	20.0414	1654
17.0536	651	20.0669	1753	20.0669	1722	17.0536	1238	20.0669	1452	20.0669	1606
17.074	701	20.0925	1669	20.0925	1686	17.074	1220	20.0925	1568	20.0925	1554
17.0945	665	20.1181	1734	20.1181	1660	17.0945	1255	20.1181	1573	20.1181	1647
17.115	706	20.1437	1775	20.1437	1743	17.115	1118	20.1437	1589	20.1437	1542
17.1354	655	20.1693	1668	20.1693	1685	17.1354	1205	20.1693	1520	20.1693	1614
17.1559	716	20.1949	1730	20.1949	1772	17.1559	1243	20.1949	1564	20.1949	1547
17.1763	714	20.2204	1672	20.2204	1723	17.1763	1220	20.2204	1572	20.2204	1696
17.1968	741	20.246	1718	20.246	1692	17.1968	1280	20.246	1532	20.246	1619
17.2173	712	20.2716	1700	20.2716	1725	17.2173	1179	20.2716	1572	20.2716	1675
17.2377	658	20.2972	1698	20.2972	1693	17.2377	1274	20.2972	1626	20.2972	1699
17.2582	665	20.3228	1676	20.3228	1695	17.2582	1237	20.3228	1573	20.3228	1619
17.2787	701	20.3483	1751	20.3483	1725	17.2787	1171	20.3483	1575	20.3483	1665
17.2991	674	20.3739	1765	20.3739	1714	17.2991	1237	20.3739	1599	20.3739	1623
17.3196	638	20.3995	1721	20.3995	1733	17.3196	1233	20.3995	1562	20.3995	1697
17.3401	706	20.4251	1745	20.4251	1778	17.3401	1162	20.4251	1665	20.4251	1637
17.3605	697	20.4507	1727	20.4507	1732	17.3605	1209	20.4507	1488	20.4507	1700
17.381	704	20.4762	1655	20.4762	1747	17.381	1240	20.4762	1550	20.4762	1644
17.4015	691	20.5018	1762	20.5018	1761	17.4015	1193	20.5018	1585	20.5018	1656
17.4219	685	20.5274	1740	20.5274	1768	17.4219	1232	20.5274	1552	20.5274	1603
17.4424	644	20.553	1697	20.553	1816	17.4424	1280	20.553	1584	20.553	1572
17.4628	717	20.5786	1785	20.5786	1740	17.4628	1270	20.5786	1562	20.5786	1601
17.4833	711	20.6041	1710	20.6041	1749	17.4833	1229	20.6041	1565	20.6041	1668
17.5038	665	20.6297	1725	20.6297	1701	17.5038	1286	20.6297	1534	20.6297	1663
17.5242	698	20.6553	1758	20.6553	1707	17.5242	1188	20.6553	1608	20.6553	1642
17.5447	712	20.6809	1760	20.6809	1787	17.5447	1237	20.6809	1602	20.6809	1590
17.5652	680	20.7065	1770	20.7065	1707	17.5652	1273	20.7065	1594	20.7065	1696
17.5856	687	20.732	1725	20.732	1665	17.5856	1264	20.732	1537	20.732	1630
17.6061	671	20.7576	1735	20.7576	1680	17.6061	1241	20.7576	1581	20.7576	1622
17.6266	686	20.7832	1789	20.7832	1742	17.6266	1316	20.7832	1587	20.7832	1640
17.647	670	20.8088	1778	20.8088	1777	17.647	1229	20.8088	1588	20.8088	1713
17.6675	640	20.8344	1748	20.8344	1827	17.6675	1259	20.8344	1633	20.8344	1660
17.688	698	20.8599	1709	20.8599	1740	17.688	1217	20.8599	1564	20.8599	1747
17.7084	695	20.8855	1738	20.8855	1716	17.7084	1256	20.8855	1582	20.8855	1709
17.7289	657	20.9111	1743	20.9111	1762	17.7289	1220	20.9111	1586	20.9111	1680
17.7493	722	20.9367	1787	20.9367	1810	17.7493	1344	20.9367	1561	20.9367	1707
17.7698	718	20.9623	1780	20.9623	1736	17.7698	1221	20.9623	1587	20.9623	1696
17.7903	636	20.9878	1719	20.9878	1712	17.7903	1277	20.9878	1551	20.9878	1655
17.8107	723	21.0134	1807	21.0134	1806	17.8107	1196	21.0134	1648	21.0134	1667
17.8312	718	21.039	1744	21.039	1777	17.8312	1250	21.039	1636	21.039	1644
17.8517	688	21.0646	1686	21.0646	1780	17.8517	1220	21.0646	1611	21.0646	1720
17.8721	691	21.0902	1815	21.0902	1762	17.8721	1246	21.0902	1535	21.0902	1676
17.8926	692	21.1158	1769	21.1158	1780	17.8926	1263	21.1158	1648	21.1158	1667
17.9131	707	21.1413	1765	21.1413	1841	17.9131	1224	21.1413	1586	21.1413	1610
17.9335	658	21.1669	1767	21.1669	1704	17.9335	1319	21.1669	1594	21.1669	1673
17.954	691	21.1925	1773	21.1925	1833	17.954	1285	21.1925	1514	21.1925	1652
17.9745	707	21.2181	1765	21.2181	1642	17.9745	1297	21.2181	1557	21.2181	1672
17.9949	644	21.2437	1681	21.2437	1699	17.9949	1233	21.2437	1606	21.2437	1667
18.0154	721	21.2692	1669	21.2692	1748	18.0154	1296	21.2692	1627	21.2692	1666
18.0359	694	21.2948	1848	21.2948	1784	18.0359	1313	21.2948	1581	21.2948	1719
18.0563	675	21.3204	1834	21.3204	1779	18.0563	1289	21.3204	1589	21.3204	1709
18.0768	704	21.346	1820	21.346	1794	18.0768	1299	21.346	1578	21.346	1632
18.0972	691	21.3716	1731	21.3716	1824	18.0972	1227	21.3716	1540	21.3716	1555
18.1177	683	21.3971	1790	21.3971	1818	18.1177	1298	21.3971	1589	21.3971	1694
18.1382	699	21.4227	1741	21.4227	1821	18.1382	1235	21.4227	1585	21.4227	1723
18.1586	660	21.4483	1804	21.4483	1850	18.1586	1285	21.4483	1642	21.4483	1675
18.1791	659	21.4739	1788	21.4739	1810	18.1791	1302	21.4739	1608	21.4739	1627
18.1996	720	21.4995	1703	21.4995	1879	18.1996	1297	21.4995	1626	21.4995	1760
18.22	703	21.525	1795	21.525	1812	18.22	1288	21.525	1656	21.525	1686
18.2405	713	21.5506	1727	21.5506	1721	18.2405	1291	21.5506	1592	21.5506	1614
18.261	708	21.5762	1769	21.5762	1872	18.261	1328	21.5762	1667	21.5762	1664
18.2814	778	21.6018	1816	21.6018	1818	18.2814	1357	21.6018	1642	21.6018	1696
18.3019	726	21.6274	1784	21.6274	1800	18.3019	1305	21.6274	1581	21.6274	1670
18.3224	723	21.6529	1817	21.6529	1782	18.3224	1312	21.6529	1581	21.6529	1758
18.3428	782	21.6785	1822	21.6785	1774	18.3428	1303	21.6785	1658	21.6785	1686
18.3633	722	21.7041	1746	21.7041	1726	18.3633	1269	21.7041	1654	21.7041	1664
18.3837	698	21.7297	1805	21.7297	1702	18.3837	1314	21.7297	1624	21.7297	1678
18.4042	748	21.7553	1760	21.7553	1775	18.4042	1224	21.7553	1609	21.7553	1721
18.4247	740	21.7808	1836	21.7808	1779	18.4247	1341	21.7808	1591	21.7808	1684
18.4451	748	21.8064	1875	21.8064	1827	18.4451	1343	21.8064	1636	21.8064	1713
18.4656	695	21.832	1791	21.832	1792	18.4656	1311	21.832	1653	21.832	1703
18.4861	665	21.8576	1734	21.8576	1721	18.4861	1277	21.8576	1552	21.8576	1692
18.5065	697	21.8832	1839	21.8832	1817	18.5065	1231	21.8832	1606	21.8832	1653
18.527	722	21.9087	1859	21.9087	1782	18.527	1292	21.9087	1659	21.9087	1663
18.5475	747	21.9343	1866	21.9343	1823	18.5475	1312	21.9343	1634	21.9343	1714
18.5679	675	21.9599	1838	21.9599	1759	18.5679	1328	21.9599	1623	21.9599	1714
18.5884	694	21.9855	1819	21.9855	1811	18.5884	1324	21.9855	1656	21.9855	1638
18.6089	676	22.0111	1824	22.0111	1786	18.6089	1228	22.0111	1612	22.0111	1684
18.6293	713	22.0367	1799	22.0367	1827	18.6293	1285	22.0367	1648	22.0367	1766
18.6498	683	22.0622	1782	22.0622	1791	18.6498	1265	22.0622	1641	22.0622	1751
18.6702	712	22.0878	1778	22.0878	1757	18.6702	1320	22.0878	1639	22.0878	1644
18.6907	724	22.1134	1723	22.1134	1731	18.6907	1347	22.1134	1674	22.1134	1704
18.7112	697	22.139	1806	22.139	1751	18.7112	1310	22.139	1610	22.139	1603
18.7316	692	22.1646	1751	22.1646	1808	18.7316	1260	22.1646	1649	22.1646	1699
18.7521	729	22.1901	1754	22.1901	1865	18.7521	1289	22.1901	1639	22.1901	1709
18.7726	761	22.2157	1868	22.2157	1770	18.7726	1337	22.2157	1608	22.2157	1711
18.793	712	22.2413	1818	22.2413	1877	18.793	1315	22.2413	1615	22.2413	1685
18.8135	680	22.2669	1753	22.2669	1828	18.8135	1294	22.2669	1629	22.2669	1672
18.834	730	22.2925	1747	22.2925	1803	18.834	1290	22.2925	1656	22.2925	1675
18.8544	737	22.318	1857	22.318	1801	18.8544	1207	22.318	1641	22.318	1682
18.8749	694	22.3436	1848	22.3436	1846	18.8749	1274	22.3436	1572	22.3436	1613
18.8954	733	22.3692	1757	22.3692	1845	18.8954	1320	22.3692	1602	22.3692	1719
18.9158	747	22.3948	1760	22.3948	1832	18.9158	1340	22.3948	1595	22.3948	1719
18.9363	707	22.4204	1819	22.4204	1735	18.9363	1305	22.4204	1695	22.4204	1776
18.9568	731	22.4459	1831	22.4459	1830	18.9568	1312	22.4459	1666	22.4459	1727
18.9772	729	22.4715	1782	22.4715	1785	18.9772	1276	22.4715	1657	22.4715	1672
18.9977	719	22.4971	1844	22.4971	1824	18.9977	1292	22.4971	1666	22.4971	1673
19.0181	704	22.5227	1764	22.5227	1834	19.0181	1338	22.5227	1618	22.5227	1726
19.0386	717	22.5483	1826	22.5483	1877	19.0386	1292	22.5483	1727	22.5483	1609
19.0591	746	22.5738	1866	22.5738	1809	19.0591	1297	22.5738	1625	22.5738	1700
19.0795	709	22.5994	1818	22.5994	1765	19.0795	1327	22.5994	1668	22.5994	1744
19.1	681	22.625	1786	22.625	1859	19.1	1356	22.625	1602	22.625	1815
19.1205	725	22.6506	1790	22.6506	1866	19.1205	1323	22.6506	1671	22.6506	1796
19.1409	687	22.6762	1800	22.6762	1805	19.1409	1341	22.6762	1781	22.6762	1708
19.1614	695	22.7017	1811	22.7017	1702	19.1614	1263	22.7017	1652	22.7017	1722
19.1819	743	22.7273	1797	22.7273	1829	19.1819	1299	22.7273	1659	22.7273	1679
19.2023	709	22.7529	1760	22.7529	1782	19.2023	1301	22.7529	1593	22.7529	1734
19.2228	654	22.7785	1820	22.7785	1810	19.2228	1327	22.7785	1681	22.7785	1696
19.2433	713	22.8041	1919	22.8041	1841	19.2433	1277	22.8041	1745	22.8041	1774
19.2637	714	22.8296	1865	22.8296	1780	19.2637	1357	22.8296	1588	22.8296	1738
19.2842	722	22.8552	1856	22.8552	1810	19.2842	1289	22.8552	1681	22.8552	1709
19.3046	679	22.8808	1876	22.8808	1884	19.3046	1277	22.8808	1647	22.8808	1730
19.3251	687	22.9064	1806	22.9064	1745	19.3251	1316	22.9064	1683	22.9064	1683
19.3456	690	22.932	1763	22.932	1746	19.3456	1338	22.932	1712	22.932	1763
19.366	686	22.9576	1796	22.9576	1784	19.366	1316	22.9576	1632	22.9576	1684
19.3865	721	22.9831	1840	22.9831	1872	19.3865	1268	22.9831	1719	22.9831	1657
19.407	696	23.0087	1851	23.0087	1787	19.407	1342	23.0087	1689	23.0087	1703
19.4274	739	23.0343	1861	23.0343	1815	19.4274	1295	23.0343	1622	23.0343	1744
19.4479	728	23.0599	1802	23.0599	1803	19.4479	1369	23.0599	1661	23.0599	1710
19.4684	776	23.0855	1891	23.0855	1842	19.4684	1302	23.0855	1654	23.0855	1697
19.4888	751	23.111	1781	23.111	1809	19.4888	1272	23.111	1664	23.111	1722
19.5093	672	23.1366	1866	23.1366	1838	19.5093	1375	23.1366	1679	23.1366	1745
19.5298	681	23.1622	1844	23.1622	1924	19.5298	1246	23.1622	1705	23.1622	1741
19.5502	730	23.1878	1823	23.1878	1800	19.5502	1327	23.1878	1659	23.1878	1704
19.5707	697	23.2134	1825	23.2134	1842	19.5707	1348	23.2134	1635	23.2134	1784
19.5911	753	23.2389	1832	23.2389	1854	19.5911	1307	23.2389	1654	23.2389	1714
19.6116	750	23.2645	1857	23.2645	1852	19.6116	1354	23.2645	1671	23.2645	1652
19.6321	753	23.2901	1830	23.2901	1796	19.6321	1292	23.2901	1707	23.2901	1661
19.6525	731	23.3157	1860	23.3157	1794	19.6525	1325	23.3157	1608	23.3157	1778
19.673	714	23.3413	1813	23.3413	1843	19.673	1216	23.3413	1702	23.3413	1708
19.6935	734	23.3668	1889	23.3668	1842	19.6935	1320	23.3668	1717	23.3668	1764
19.7139	678	23.3924	1831	23.3924	1775	19.7139	1353	23.3924	1659	23.3924	1801
19.7344	716	23.418	1891	23.418	1877	19.7344	1291	23.418	1736	23.418	1681
19.7549	722	23.4436	1833	23.4436	1872	19.7549	1388	23.4436	1674	23.4436	1676
19.7753	702	23.4692	1858	23.4692	1785	19.7753	1339	23.4692	1640	23.4692	1757
19.7958	713	23.4947	1825	23.4947	1840	19.7958	1315	23.4947	1622	23.4947	1681
19.8163	726	23.5203	1886	23.5203	1837	19.8163	1339	23.5203	1670	23.5203	1706
19.8367	730	23.5459	1757	23.5459	1862	19.8367	1297	23.5459	1670	23.5459	1700
19.8572	679	23.5715	1907	23.5715	1833	19.8572	1357	23.5715	1663	23.5715	1758
19.8777	688	23.5971	1790	23.5971	1789	19.8777	1317	23.5971	1733	23.5971	1740
19.8981	751	23.6226	1809	23.6226	1898	19.8981	1365	23.6226	1705	23.6226	1708
19.9186	689	23.6482	1898	23.6482	1908	19.9186	1322	23.6482	1719	23.6482	1741
19.939	696	23.6738	1794	23.6738	1813	19.939	1291	23.6738	1679	23.6738	1697
19.9595	770	23.6994	1861	23.6994	1811	19.9595	1333	23.6994	1665	23.6994	1734
19.98	732	23.725	1818	23.725	1826	19.98	1310	23.725	1781	23.725	1709
20.0004	725	23.7505	1850	23.7505	1843	20.0004	1337	23.7505	1642	23.7505	1741
20.0209	707	23.7761	1813	23.7761	1816	20.0209	1318	23.7761	1674	23.7761	1783
20.0414	744	23.8017	1830	23.8017	1843	20.0414	1342	23.8017	1701	23.8017	1688
20.0618	720	23.8273	1909	23.8273	1810	20.0618	1246	23.8273	1688	23.8273	1789
20.0823	730	23.8529	1830	23.8529	1918	20.0823	1384	23.8529	1717	23.8529	1750
20.1028	706	23.8785	1769	23.8785	1825	20.1028	1435	23.8785	1767	23.8785	1724
20.1232	707	23.904	1905	23.904	1913	20.1232	1307	23.904	1726	23.904	1776
20.1437	742	23.9296	1810	23.9296	1890	20.1437	1340	23.9296	1684	23.9296	1723
20.1642	766	23.9552	1907	23.9552	1824	20.1642	1316	23.9552	1670	23.9552	1753
20.1846	700	23.9808	1750	23.9808	1832	20.1846	1272	23.9808	1712	23.9808	1765
20.2051	709	24.0064	1848	24.0064	1849	20.2051	1292	24.0064	1718	24.0064	1797
20.2255	717	24.0319	1847	24.0319	1788	20.2255	1301	24.0319	1588	24.0319	1719
20.246	694	24.0575	1808	24.0575	1913	20.246	1348	24.0575	1666	24.0575	1684
20.2665	704	24.0831	1864	24.0831	1820	20.2665	1388	24.0831	1677	24.0831	1708
20.2869	761	24.1087	1892	24.1087	1810	20.2869	1306	24.1087	1703	24.1087	1795
20.3074	744	24.1343	1796	24.1343	1873	20.3074	1379	24.1343	1694	24.1343	1796
20.3279	690	24.1598	1896	24.1598	1921	20.3279	1379	24.1598	1694	24.1598	1749
20.3483	695	24.1854	1819	24.1854	1839	20.3483	1342	24.1854	1696	24.1854	1760
20.3688	732	24.211	1900	24.211	1938	20.3688	1362	24.211	1750	24.211	1799
20.3893	748	24.2366	1884	24.2366	1850	20.3893	1344	24.2366	1649	24.2366	1734
20.4097	711	24.2622	1884	24.2622	1825	20.4097	1332	24.2622	1684	24.2622	1770
20.4302	748	24.2877	1781	24.2877	1851	20.4302	1358	24.2877	1713	24.2877	1746
20.4507	770	24.3133	1856	24.3133	1897	20.4507	1324	24.3133	1692	24.3133	1736
20.4711	747	24.3389	1874	24.3389	1866	20.4711	1332	24.3389	1682	24.3389	1724
20.4916	755	24.3645	1865	24.3645	1877	20.4916	1360	24.3645	1734	24.3645	1704
20.512	727	24.3901	1920	24.3901	1836	20.512	1345	24.3901	1714	24.3901	1805
20.5325	737	24.4156	1850	24.4156	1800	20.5325	1340	24.4156	1701	24.4156	1702
20.553	735	24.4412	1852	24.4412	1905	20.553	1369	24.4412	1704	24.4412	1702
20.5734	781	24.4668	1793	24.4668	1927	20.5734	1437	24.4668	1687	24.4668	1712
20.5939	777	24.4924	1891	24.4924	1863	20.5939	1378	24.4924	1733	24.4924	1762
20.6144	775	24.518	1881	24.518	1839	20.6144	1310	24.518	1671	24.518	1723
20.6348	764	24.5435	1860	24.5435	1877	20.6348	1348	24.5435	1703	24.5435	1743
20.6553	758	24.5691	1829	24.5691	1809	20.6553	1333	24.5691	1703	24.5691	1728
20.6758	712	24.5947	1903	24.5947	1972	20.6758	1340	24.5947	1711	24.5947	1719
20.6962	775	24.6203	1825	24.6203	1855	20.6962	1337	24.6203	1641	24.6203	1768
20.7167	696	24.6459	1870	24.6459	1888	20.7167	1388	24.6459	1636	24.6459	1767
20.7372	709	24.6714	1949	24.6714	1833	20.7372	1362	24.6714	1727	24.6714	1803
20.7576	708	24.697	1923	24.697	1802	20.7576	1340	24.697	1647	24.697	1847
20.7781	777	24.7226	1903	24.7226	1842	20.7781	1307	24.7226	1709	24.7226	1806
20.7986	751	24.7482	1946	24.7482	1909	20.7986	1407	24.7482	1718	24.7482	1748
20.819	735	24.7738	1882	24.7738	1901	20.819	1369	24.7738	1767	24.7738	1777
20.8395	758	24.7994	1834	24.7994	1832	20.8395	1338	24.7994	1730	24.7994	1744
20.8599	761	24.8249	1861	24.8249	1903	20.8599	1359	24.8249	1744	24.8249	1838
20.8804	792	24.8505	1936	24.8505	1875	20.8804	1372	24.8505	1691	24.8505	1709
20.9009	773	24.8761	1973	24.8761	1898	20.9009	1386	24.8761	1725	24.8761	1728
20.9213	749	24.9017	1848	24.9017	1874	20.9213	1384	24.9017	1692	24.9017	1710
20.9418	792	24.9273	1884	24.9273	1920	20.9418	1357	24.9273	1709	24.9273	1782
20.9623	753	24.9528	1822	24.9528	1855	20.9623	1420	24.9528	1734	24.9528	1811
20.9827	750	24.9784	1882	24.9784	1877	20.9827	1408	24.9784	1672	24.9784	1797
21.0032	768	25.004	1824	25.004	1887	21.0032	1407	25.004	1635	25.004	1778
21.0237	748	25.0296	1821	25.0296	1938	21.0237	1279	25.0296	1769	25.0296	1685
21.0441	766	25.0552	1844	25.0552	1956	21.0441	1390	25.0552	1767	25.0552	1739
21.0646	759	25.0807	1836	25.0807	1822	21.0646	1381	25.0807	1729	25.0807	1777
21.0851	745	25.1063	1903	25.1063	1879	21.0851	1416	25.1063	1739	25.1063	1694
21.1055	753	25.1319	1840	25.1319	1845	21.1055	1409	25.1319	1726	25.1319	1779
21.126	773	25.1575	1868	25.1575	1841	21.126	1366	25.1575	1666	25.1575	1752
21.1464	766	25.1831	1911	25.1831	1944	21.1464	1378	25.1831	1757	25.1831	1760
21.1669	764	25.2086	1885	25.2086	1885	21.1669	1409	25.2086	1707	25.2086	1794
21.1874	787	25.2342	1818	25.2342	1869	21.1874	1400	25.2342	1775	25.2342	1742
21.2078	716	25.2598	1940	25.2598	1921	21.2078	1368	25.2598	1636	25.2598	1743
21.2283	732	25.2854	1857	25.2854	1913	21.2283	1326	25.2854	1674	25.2854	1711
21.2488	737	25.311	1895	25.311	1861	21.2488	1332	25.311	1706	25.311	1820
21.2692	791	25.3365	1843	25.3365	1889	21.2692	1353	25.3365	1694	25.3365	1797
21.2897	780	25.3621	1875	25.3621	1898	21.2897	1382	25.3621	1770	25.3621	1801
21.3102	754	25.3877	1870	25.3877	1957	21.3102	1384	25.3877	1682	25.3877	1728
21.3306	791	25.4133	1855	25.4133	1882	21.3306	1424	25.4133	1729	25.4133	1781
21.3511	740	25.4389	1866	25.4389	1801	21.3511	1366	25.4389	1762	25.4389	1785
21.3716	731	25.4644	1937	25.4644	1908	21.3716	1415	25.4644	1750	25.4644	1687
21.392	762	25.49	1938	25.49	1846	21.392	1283	25.49	1742	25.49	1743
21.4125	720	25.5156	1952	25.5156	1824	21.4125	1335	25.5156	1658	25.5156	1798
21.4329	736	25.5412	1876	25.5412	1832	21.4329	1414	25.5412	1771	25.5412	1741
21.4534	800	25.5668	1923	25.5668	1863	21.4534	1414	25.5668	1766	25.5668	1759
21.4739	737	25.5923	1947	25.5923	1892	21.4739	1360	25.5923	1704	25.5923	1735
21.4943	695	25.6179	1839	25.6179	1841	21.4943	1364	25.6179	1752	25.6179	1762
21.5148	805	25.6435	1852	25.6435	1955	21.5148	1461	25.6435	1729	25.6435	1806
21.5353	768	25.6691	1951	25.6691	1880	21.5353	1346	25.6691	1645	25.6691	1784
21.5557	703	25.6947	1887	25.6947	1803	21.5557	1407	25.6947	1717	25.6947	1788
21.5762	732	25.7203	1917	25.7203	1884	21.5762	1446	25.7203	1726	25.7203	1778
21.5967	734	25.7458	1893	25.7458	1763	21.5967	1402	25.7458	1729	25.7458	1695
21.6171	816	25.7714	1902	25.7714	1884	21.6171	1412	25.7714	1715	25.7714	1803
21.6376	738	25.797	1905	25.797	1907	21.6376	1337	25.797	1772	25.797	1802
21.6581	787	25.8226	1889	25.8226	1952	21.6581	1409	25.8226	1687	25.8226	1782
21.6785	771	25.8482	1838	25.8482	1817	21.6785	1421	25.8482	1771	25.8482	1809
21.699	693	25.8737	1890	25.8737	1825	21.699	1375	25.8737	1753	25.8737	1816
21.7195	786	25.8993	1947	25.8993	1886	21.7195	1363	25.8993	1666	25.8993	1770
21.7399	785	25.9249	1947	25.9249	1871	21.7399	1434	25.9249	1803	25.9249	1790
21.7604	746	25.9505	1963	25.9505	1932	21.7604	1355	25.9505	1735	25.9505	1735
21.7808	715	25.9761	1956	25.9761	1920	21.7808	1345	25.9761	1735	25.9761	1754
21.8013	760	26.0016	1939	26.0016	1876	21.8013	1477	26.0016	1776	26.0016	1770
21.8218	755	26.0272	1856	26.0272	1865	21.8218	1436	26.0272	1716	26.0272	1781
21.8422	808	26.0528	1871	26.0528	1862	21.8422	1413	26.0528	1702	26.0528	1834
21.8627	746	26.0784	1931	26.0784	1876	21.8627	1376	26.0784	1704	26.0784	1819
21.8832	785	26.104	1905	26.104	1904	21.8832	1464	26.104	1700	26.104	1771
21.9036	773	26.1295	1956	26.1295	1850	21.9036	1386	26.1295	1835	26.1295	1737
21.9241	752	26.1551	1873	26.1551	1960	21.9241	1408	26.1551	1768	26.1551	1785
21.9446	760	26.1807	1912	26.1807	1890	21.9446	1359	26.1807	1748	26.1807	1726
21.965	780	26.2063	1922	26.2063	1858	21.965	1419	26.2063	1744	26.2063	1787
21.9855	746	26.2319	1904	26.2319	1889	21.9855	1356	26.2319	1767	26.2319	1804
22.006	743	26.2574	1846	26.2574	1872	22.006	1451	26.2574	1697	26.2574	1731
22.0264	718	26.283	1821	26.283	1899	22.0264	1408	26.283	1764	26.283	1745
22.0469	766	26.3086	1889	26.3086	1912	22.0469	1415	26.3086	1751	26.3086	1730
22.0673	754	26.3342	1978	26.3342	2007	22.0673	1446	26.3342	1708	26.3342	1800
22.0878	764	26.3598	1768	26.3598	1932	22.0878	1443	26.3598	1718	26.3598	1845
22.1083	838	26.3853	1972	26.3853	1937	22.1083	1378	26.3853	1751	26.3853	1854
22.1287	774	26.4109	1895	26.4109	1849	22.1287	1358	26.4109	1725	26.4109	1760
22.1492	772	26.4365	1880	26.4365	1831	22.1492	1422	26.4365	1725	26.4365	1767
22.1697	803	26.4621	1885	26.4621	1959	22.1697	1373	26.4621	1810	26.4621	1824
22.1901	800	26.4877	1963	26.4877	1885	22.1901	1393	26.4877	1807	26.4877	1835
22.2106	744	26.5132	1922	26.5132	1899	22.2106	1406	26.5132	1780	26.5132	1774
22.2311	768	26.5388	1975	26.5388	1951	22.2311	1446	26.5388	1771	26.5388	1710
22.2515	770	26.5644	1926	26.5644	1959	22.2515	1476	26.5644	1693	26.5644	1824
22.272	790	26.59	1906	26.59	1921	22.272	1477	26.59	1775	26.59	1898
22.2925	744	26.6156	2001	26.6156	1867	22.2925	1397	26.6156	1729	26.6156	1815
22.3129	795	26.6412	1868	26.6412	1910	22.3129	1436	26.6412	1797	26.6412	1765
22.3334	792	26.6667	1858	26.6667	1933	22.3334	1420	26.6667	1741	26.6667	1827
22.3538	771	26.6923	1893	26.6923	1938	22.3538	1425	26.6923	1825	26.6923	1818
22.3743	787	26.7179	1957	26.7179	1964	22.3743	1437	26.7179	1785	26.7179	1827
22.3948	784	26.7435	2004	26.7435	1902	22.3948	1410	26.7435	1716	26.7435	1782
22.4152	773	26.7691	1828	26.7691	1999	22.4152	1426	26.7691	1735	26.7691	1815
22.4357	731	26.7946	1886	26.7946	1881	22.4357	1394	26.7946	1792	26.7946	1854
22.4562	805	26.8202	1944	26.8202	1838	22.4562	1443	26.8202	1782	26.8202	1840
22.4766	770	26.8458	1958	26.8458	1903	22.4766	1463	26.8458	1703	26.8458	1744
22.4971	793	26.8714	1836	26.8714	1938	22.4971	1438	26.8714	1761	26.8714	1784
22.5176	771	26.897	1895	26.897	1879	22.5176	1438	26.897	1690	26.897	1891
22.538	723	26.9225	1873	26.9225	1789	22.538	1382	26.9225	1736	26.9225	1767
22.5585	774	26.9481	1920	26.9481	1880	22.5585	1359	26.9481	1750	26.9481	1783
22.579	788	26.9737	1935	26.9737	1875	22.579	1459	26.9737	1748	26.9737	1818
22.5994	780	26.9993	1950	26.9993	1867	22.5994	1429	26.9993	1802	26.9993	1744
22.6199	730	27.0249	1894	27.0249	1953	22.6199	1460	27.0249	1796	27.0249	1797
22.6404	809	27.0504	1931	27.0504	1944	22.6404	1357	27.0504	1782	27.0504	1781
22.6608	794	27.076	1923	27.076	1950	22.6608	1440	27.076	1745	27.076	1790
22.6813	811	27.1016	1887	27.1016	1866	22.6813	1436	27.1016	1726	27.1016	1812
22.7017	702	27.1272	1939	27.1272	1857	22.7017	1420	27.1272	1798	27.1272	1814
22.7222	781	27.1528	1976	27.1528	1918	22.7222	1374	27.1528	1785	27.1528	1792
22.7427	806	27.1783	1941	27.1783	1987	22.7427	1420	27.1783	1733	27.1783	1821
22.7631	771	27.2039	1896	27.2039	1966	22.7631	1393	27.2039	1748	27.2039	1766
22.7836	744	27.2295	1962	27.2295	1927	22.7836	1393	27.2295	1743	27.2295	1684
22.8041	758	27.2551	1943	27.2551	1960	22.8041	1429	27.2551	1852	27.2551	1856
22.8245	787	27.2807	1919	27.2807	1880	22.8245	1423	27.2807	1799	27.2807	1771
22.845	791	27.3062	1932	27.3062	1920	22.845	1455	27.3062	1758	27.3062	1879
22.8655	832	27.3318	1980	27.3318	1886	22.8655	1368	27.3318	1773	27.3318	1867
22.8859	783	27.3574	1934	27.3574	1938	22.8859	1410	27.3574	1729	27.3574	1850
22.9064	820	27.383	1919	27.383	1964	22.9064	1467	27.383	1826	27.383	1877
22.9269	800	27.4086	1894	27.4086	1915	22.9269	1424	27.4086	1803	27.4086	1867
22.9473	784	27.4341	1951	27.4341	1964	22.9473	1431	27.4341	1810	27.4341	1850
22.9678	774	27.4597	1989	27.4597	1854	22.9678	1431	27.4597	1743	27.4597	1825
22.9882	765	27.4853	2044	27.4853	2012	22.9882	1486	27.4853	1800	27.4853	1841
23.0087	712	27.5109	2018	27.5109	1949	23.0087	1462	27.5109	1795	27.5109	1821
23.0292	760	27.5365	1957	27.5365	1919	23.0292	1444	27.5365	1732	27.5365	1850
23.0496	770	27.5621	1952	27.5621	1856	23.0496	1442	27.5621	1777	27.5621	1768
23.0701	749	27.5876	1941	27.5876	1943	23.0701	1374	27.5876	1790	27.5876	1835
23.0906	840	27.6132	1936	27.6132	1951	23.0906	1423	27.6132	1836	27.6132	1814
23.111	744	27.6388	1916	27.6388	1932	23.111	1413	27.6388	1770	27.6388	1842
23.1315	809	27.6644	1968	27.6644	1889	23.1315	1416	27.6644	1746	27.6644	1780
23.152	759	27.69	1868	27.69	1899	23.152	1413	27.69	1757	27.69	1779
23.1724	752	27.7155	1925	27.7155	1934	23.1724	1471	27.7155	1709	27.7155	1774
23.1929	803	27.7411	1918	27.7411	1912	23.1929	1492	27.7411	1855	27.7411	1868
23.2134	796	27.7667	1919	27.7667	1934	23.2134	1420	27.7667	1755	27.7667	1786
23.2338	800	27.7923	2056	27.7923	1997	23.2338	1413	27.7923	1754	27.7923	1799
23.2543	761	27.8179	1925	27.8179	1946	23.2543	1438	27.8179	1786	27.8179	1824
23.2747	767	27.8434	1912	27.8434	1978	23.2747	1393	27.8434	1837	27.8434	1803
23.2952	753	27.869	1934	27.869	2016	23.2952	1420	27.869	1885	27.869	1832
23.3157	747	27.8946	1918	27.8946	1952	23.3157	1405	27.8946	1760	27.8946	1859
23.3361	829	27.9202	1989	27.9202	1989	23.3361	1441	27.9202	1761	27.9202	1824
23.3566	735	27.9458	1910	27.9458	1991	23.3566	1396	27.9458	1799	27.9458	1780
23.3771	795	27.9713	1932	27.9713	1901	23.3771	1493	27.9713	1773	27.9713	1804
23.3975	797	27.9969	1954	27.9969	1895	23.3975	1431	27.9969	1763	27.9969	1757
23.418	763	28.0225	1916	28.0225	1938	23.418	1460	28.0225	1792	28.0225	1898
23.4385	787	28.0481	1896	28.0481	1931	23.4385	1460	28.0481	1817	28.0481	1871
23.4589	738	28.0737	1927	28.0737	1975	23.4589	1439	28.0737	1799	28.0737	1751
23.4794	745	28.0992	1915	28.0992	1908	23.4794	1402	28.0992	1802	28.0992	1769
23.4999	796	28.1248	2013	28.1248	1918	23.4999	1436	28.1248	1811	28.1248	1777
23.5203	808	28.1504	1890	28.1504	1945	23.5203	1431	28.1504	1766	28.1504	1825
23.5408	777	28.176	1962	28.176	2019	23.5408	1409	28.176	1829	28.176	1866
23.5613	777	28.2016	1974	28.2016	1902	23.5613	1402	28.2016	1790	28.2016	1805
23.5817	813	28.2271	1945	28.2271	1891	23.5817	1393	28.2271	1828	28.2271	1935
23.6022	767	28.2527	1883	28.2527	1902	23.6022	1476	28.2527	1804	28.2527	1760
23.6226	778	28.2783	1970	28.2783	1922	23.6226	1467	28.2783	1782	28.2783	1811
23.6431	757	28.3039	1945	28.3039	1963	23.6431	1457	28.3039	1841	28.3039	1820
23.6636	821	28.3295	1985	28.3295	1957	23.6636	1497	28.3295	1774	28.3295	1795
23.684	782	28.355	1886	28.355	1898	23.684	1395	28.355	1871	28.355	1811
23.7045	788	28.3806	1978	28.3806	1892	23.7045	1465	28.3806	1705	28.3806	1799
23.725	771	28.4062	1955	28.4062	1950	23.725	1401	28.4062	1731	28.4062	1739
23.7454	722	28.4318	1969	28.4318	1936	23.7454	1430	28.4318	1841	28.4318	1785
23.7659	769	28.4574	1999	28.4574	2025	23.7659	1494	28.4574	1745	28.4574	1840
23.7864	778	28.483	2008	28.483	1960	23.7864	1432	28.483	1756	28.483	1763
23.8068	783	28.5085	2040	28.5085	1963	23.8068	1538	28.5085	1794	28.5085	1788
23.8273	777	28.5341	2004	28.5341	1868	23.8273	1495	28.5341	1774	28.5341	1785
23.8478	769	28.5597	1942	28.5597	1998	23.8478	1468	28.5597	1829	28.5597	1822
23.8682	736	28.5853	1971	28.5853	1943	23.8682	1408	28.5853	1823	28.5853	1840
23.8887	797	28.6109	2042	28.6109	1869	23.8887	1406	28.6109	1708	28.6109	1863
23.9091	735	28.6364	1895	28.6364	1953	23.9091	1425	28.6364	1858	28.6364	1820
23.9296	806	28.662	2011	28.662	1918	23.9296	1457	28.662	1863	28.662	1807
23.9501	772	28.6876	1867	28.6876	1922	23.9501	1422	28.6876	1812	28.6876	1868
23.9705	751	28.7132	1913	28.7132	1894	23.9705	1451	28.7132	1782	28.7132	1850
23.991	728	28.7388	2058	28.7388	1989	23.991	1444	28.7388	1807	28.7388	1815
24.0115	732	28.7643	1964	28.7643	1954	24.0115	1420	28.7643	1742	28.7643	1734
24.0319	753	28.7899	1942	28.7899	1929	24.0319	1487	28.7899	1850	28.7899	1686
24.0524	793	28.8155	1967	28.8155	1943	24.0524	1438	28.8155	1791	28.8155	1833
24.0729	809	28.8411	1957	28.8411	1990	24.0729	1506	28.8411	1805	28.8411	1782
24.0933	819	28.8667	2072	28.8667	2021	24.0933	1424	28.8667	1757	28.8667	1795
24.1138	781	28.8922	1894	28.8922	1912	24.1138	1439	28.8922	1774	28.8922	1787
24.1343	788	28.9178	2027	28.9178	1951	24.1343	1435	28.9178	1781	28.9178	1807
24.1547	793	28.9434	1897	28.9434	1985	24.1547	1457	28.9434	1784	28.9434	1871
24.1752	776	28.969	1898	28.969	1843	24.1752	1467	28.969	1746	28.969	1864
24.1956	751	28.9946	1937	28.9946	2014	24.1956	1503	28.9946	1773	28.9946	1828
24.2161	763	29.0201	1971	29.0201	1942	24.2161	1433	29.0201	1752	29.0201	1851
24.2366	752	29.0457	1895	29.0457	1953	24.2366	1431	29.0457	1944	29.0457	1787
24.257	792	29.0713	2030	29.0713	1946	24.257	1494	29.0713	1798	29.0713	1779
24.2775	723	29.0969	1989	29.0969	2001	24.2775	1480	29.0969	1806	29.0969	1810
24.298	772	29.1225	1996	29.1225	1978	24.298	1465	29.1225	1790	29.1225	1851
24.3184	816	29.148	1990	29.148	1966	24.3184	1463	29.148	1944	29.148	1853
24.3389	742	29.1736	1976	29.1736	1982	24.3389	1411	29.1736	1870	29.1736	1820
24.3594	757	29.1992	2111	29.1992	1949	24.3594	1440	29.1992	1725	29.1992	1828
24.3798	806	29.2248	1911	29.2248	2088	24.3798	1464	29.2248	1838	29.2248	1869
24.4003	830	29.2504	1975	29.2504	2002	24.4003	1536	29.2504	1844	29.2504	1828
24.4208	757	29.2759	1998	29.2759	1940	24.4208	1444	29.2759	1809	29.2759	1861
24.4412	810	29.3015	1940	29.3015	1973	24.4412	1435	29.3015	1814	29.3015	1878
24.4617	760	29.3271	2042	29.3271	2025	24.4617	1465	29.3271	1855	29.3271	1935
24.4822	754	29.3527	2036	29.3527	1963	24.4822	1429	29.3527	1780	29.3527	1880
24.5026	759	29.3783	2059	29.3783	2012	24.5026	1415	29.3783	1827	29.3783	1838
24.5231	776	29.4039	1922	29.4039	2000	24.5231	1438	29.4039	1841	29.4039	1918
24.5435	737	29.4294	1940	29.4294	1998	24.5435	1489	29.4294	1798	29.4294	1860
24.564	773	29.455	1937	29.455	2040	24.564	1511	29.455	1940	29.455	1870
24.5845	791	29.4806	1998	29.4806	2023	24.5845	1468	29.4806	1860	29.4806	1878
24.6049	750	29.5062	1937	29.5062	1944	24.6049	1464	29.5062	1793	29.5062	1856
24.6254	729	29.5318	2013	29.5318	1937	24.6254	1451	29.5318	1867	29.5318	1867
24.6459	807	29.5573	2002	29.5573	2020	24.6459	1486	29.5573	1788	29.5573	1835
24.6663	745	29.5829	2004	29.5829	2009	24.6663	1522	29.5829	1946	29.5829	1933
24.6868	778	29.6085	2013	29.6085	1938	24.6868	1450	29.6085	1866	29.6085	1876
24.7073	732	29.6341	2033	29.6341	1887	24.7073	1493	29.6341	1850	29.6341	1867
24.7277	782	29.6597	2040	29.6597	1934	24.7277	1468	29.6597	1884	29.6597	1951
24.7482	786	29.6852	1988	29.6852	1938	24.7482	1426	29.6852	1808	29.6852	1840
24.7687	783	29.7108	2018	29.7108	2015	24.7687	1463	29.7108	1869	29.7108	1894
24.7891	760	29.7364	1992	29.7364	1989	24.7891	1463	29.7364	1890	29.7364	1831
24.8096	784	29.762	2094	29.762	2022	24.8096	1419	29.762	1932	29.762	1956
24.83	744	29.7876	2085	29.7876	2020	24.83	1494	29.7876	1950	29.7876	1979
24.8505	811	29.8131	1974	29.8131	1959	24.8505	1526	29.8131	1992	29.8131	1957
24.871	777	29.8387	2051	29.8387	2098	24.871	1439	29.8387	1845	29.8387	1905
24.8914	787	29.8643	2072	29.8643	2018	24.8914	1524	29.8643	1945	29.8643	2066
24.9119	746	29.8899	2089	29.8899	2211	24.9119	1493	29.8899	1959	29.8899	1975
24.9324	799	29.9155	2124	29.9155	2052	24.9324	1469	29.9155	2010	29.9155	1987
24.9528	819	29.941	2137	29.941	2281	24.9528	1434	29.941	2009	29.941	1939
24.9733	759	29.9666	2216	29.9666	2226	24.9733	1395	29.9666	1972	29.9666	2100
24.9938	773	29.9922	2307	29.9922	2391	24.9938	1458	29.9922	2067	29.9922	2074
25.0142	833	30.0178	2445	30.0178	2489	25.0142	1471	30.0178	2018	30.0178	2077
25.0347	741	30.0434	2624	30.0434	2716	25.0347	1431	30.0434	2060	30.0434	2032
25.0552	787	30.0689	2627	30.0689	2726	25.0552	1431	30.0689	1991	30.0689	2102
25.0756	768	30.0945	2679	30.0945	2769	25.0756	1464	30.0945	2112	30.0945	2128
25.0961	757	30.1201	2773	30.1201	2819	25.0961	1456	30.1201	2093	30.1201	2181
25.1165	787	30.1457	2845	30.1457	2756	25.1165	1439	30.1457	2086	30.1457	2156
25.137	814	30.1713	2821	30.1713	2593	25.137	1465	30.1713	2089	30.1713	2057
25.1575	765	30.1968	2719	30.1968	2588	25.1575	1428	30.1968	2059	30.1968	2170
25.1779	811	30.2224	2552	30.2224	2268	25.1779	1516	30.2224	2011	30.2224	2018
25.1984	801	30.248	2439	30.248	2318	25.1984	1481	30.248	2127	30.248	2062
25.2189	759	30.2736	2429	30.2736	2150	25.2189	1431	30.2736	1991	30.2736	2033
25.2393	771	30.2992	2224	30.2992	2083	25.2393	1503	30.2992	2023	30.2992	2040
25.2598	809	30.3248	2206	30.3248	1983	25.2598	1454	30.3248	1994	30.3248	2120
25.2803	821	30.3503	2075	30.3503	2109	25.2803	1471	30.3503	1974	30.3503	1990
25.3007	812	30.3759	2077	30.3759	2020	25.3007	1423	30.3759	1893	30.3759	2039
25.3212	767	30.4015	2093	30.4015	2092	25.3212	1466	30.4015	2039	30.4015	2042
25.3417	796	30.4271	2129	30.4271	1950	25.3417	1447	30.4271	1938	30.4271	2006
25.3621	766	30.4527	2028	30.4527	2022	25.3621	1469	30.4527	1974	30.4527	1942
25.3826	801	30.4782	2073	30.4782	2046	25.3826	1458	30.4782	1926	30.4782	1983
25.4031	766	30.5038	2094	30.5038	2004	25.4031	1405	30.5038	1865	30.5038	1943
25.4235	725	30.5294	2106	30.5294	1900	25.4235	1471	30.5294	1918	30.5294	1971
25.444	749	30.555	2043	30.555	1946	25.444	1467	30.555	1927	30.555	1996
25.4644	815	30.5806	2071	30.5806	2023	25.4644	1414	30.5806	1916	30.5806	1987
25.4849	797	30.6061	2046	30.6061	2029	25.4849	1441	30.6061	1937	30.6061	1942
25.5054	744	30.6317	1962	30.6317	1948	25.5054	1474	30.6317	1859	30.6317	1962
25.5258	764	30.6573	1973	30.6573	2038	25.5258	1463	30.6573	1837	30.6573	1951
25.5463	773	30.6829	2083	30.6829	1970	25.5463	1430	30.6829	1856	30.6829	1894
25.5668	836	30.7085	1991	30.7085	2071	25.5668	1476	30.7085	1875	30.7085	1958
25.5872	807	30.734	1996	30.734	1938	25.5872	1409	30.734	1874	30.734	1852
25.6077	744	30.7596	2104	30.7596	2017	25.6077	1475	30.7596	1868	30.7596	1860
25.6282	779	30.7852	1988	30.7852	2044	25.6282	1445	30.7852	1927	30.7852	1912
25.6486	832	30.8108	1982	30.8108	2024	25.6486	1432	30.8108	1801	30.8108	1960
25.6691	777	30.8364	2036	30.8364	1956	25.6691	1434	30.8364	1890	30.8364	1886
25.6896	788	30.8619	1952	30.8619	1912	25.6896	1470	30.8619	1782	30.8619	1842
25.71	807	30.8875	1940	30.8875	1985	25.71	1507	30.8875	1973	30.8875	1865
25.7305	796	30.9131	2057	30.9131	1986	25.7305	1447	30.9131	1893	30.9131	1871
25.7509	752	30.9387	2040	30.9387	1993	25.7509	1563	30.9387	1789	30.9387	1827
25.7714	774	30.9643	2106	30.9643	1974	25.7714	1501	30.9643	1870	30.9643	1859
25.7919	775	30.9898	2000	30.9898	2020	25.7919	1438	30.9898	1819	30.9898	1858
25.8123	765	31.0154	1998	31.0154	2017	25.8123	1426	31.0154	1795	31.0154	1838
25.8328	825	31.041	1994	31.041	2004	25.8328	1426	31.041	1772	31.041	1942
25.8533	803	31.0666	2043	31.0666	2002	25.8533	1480	31.0666	1777	31.0666	1888
25.8737	768	31.0922	2000	31.0922	1870	25.8737	1539	31.0922	1907	31.0922	1856
25.8942	775	31.1177	2058	31.1177	1974	25.8942	1487	31.1177	1959	31.1177	1818
25.9147	756	31.1433	1990	31.1433	1943	25.9147	1402	31.1433	1903	31.1433	1916
25.9351	746	31.1689	2117	31.1689	2043	25.9351	1447	31.1689	1854	31.1689	1917
25.9556	841	31.1945	2049	31.1945	2041	25.9556	1421	31.1945	1863	31.1945	1884
25.9761	801	31.2201	2103	31.2201	1981	25.9761	1455	31.2201	1912	31.2201	1823
25.9965	788	31.2457	2073	31.2457	1997	25.9965	1506	31.2457	1808	31.2457	1900
26.017	778	31.2712	2005	31.2712	1911	26.017	1439	31.2712	1944	31.2712	1874
26.0374	760	31.2968	2008	31.2968	2014	26.0374	1464	31.2968	1784	31.2968	1960
26.0579	768	31.3224	2121	31.3224	1988	26.0579	1513	31.3224	1803	31.3224	1919
26.0784	764	31.348	1979	31.348	1999	26.0784	1521	31.348	1894	31.348	1750
26.0988	790	31.3736	2003	31.3736	2044	26.0988	1420	31.3736	1846	31.3736	1899
26.1193	802	31.3991	1991	31.3991	2051	26.1193	1449	31.3991	1800	31.3991	1915
26.1398	785	31.4247	1972	31.4247	2034	26.1398	1443	31.4247	1909	31.4247	1948
26.1602	760	31.4503	2065	31.4503	2037	26.1602	1459	31.4503	1847	31.4503	1834
26.1807	804	31.4759	2040	31.4759	2034	26.1807	1488	31.4759	1810	31.4759	1837
26.2012	807	31.5015	1971	31.5015	2059	26.2012	1396	31.5015	1864	31.5015	1856
26.2216	773	31.527	1965	31.527	1982	26.2216	1460	31.527	1893	31.527	1840
26.2421	749	31.5526	2056	31.5526	1957	26.2421	1488	31.5526	1845	31.5526	1881
26.2626	730	31.5782	2038	31.5782	2004	26.2626	1372	31.5782	1883	31.5782	1842
26.283	800	31.6038	2027	31.6038	2060	26.283	1486	31.6038	1821	31.6038	1796
26.3035	740	31.6294	2024	31.6294	2027	26.3035	1463	31.6294	1872	31.6294	1836
26.324	752	31.6549	1928	31.6549	2019	26.324	1404	31.6549	1816	31.6549	1861
26.3444	775	31.6805	2005	31.6805	1997	26.3444	1535	31.6805	1871	31.6805	1858
26.3649	805	31.7061	1965	31.7061	2029	26.3649	1449	31.7061	1829	31.7061	1850
26.3853	754	31.7317	1976	31.7317	1944	26.3853	1436	31.7317	1795	31.7317	1825
26.4058	808	31.7573	1971	31.7573	2015	26.4058	1466	31.7573	1806	31.7573	1919
26.4263	802	31.7828	2087	31.7828	2005	26.4263	1471	31.7828	1863	31.7828	1850
26.4467	750	31.8084	2045	31.8084	2056	26.4467	1568	31.8084	1800	31.8084	1900
26.4672	795	31.834	2128	31.834	1990	26.4672	1529	31.834	1869	31.834	1898
26.4877	766	31.8596	2045	31.8596	2024	26.4877	1447	31.8596	1866	31.8596	1899
26.5081	808	31.8852	2088	31.8852	2005	26.5081	1446	31.8852	1846	31.8852	1873
26.5286	789	31.9107	2032	31.9107	1957	26.5286	1428	31.9107	1830	31.9107	1872
26.5491	815	31.9363	2052	31.9363	2017	26.5491	1450	31.9363	1855	31.9363	1923
26.5695	776	31.9619	2009	31.9619	1975	26.5695	1419	31.9619	1784	31.9619	1908
26.59	814	31.9875	2045	31.9875	1959	26.59	1482	31.9875	1884	31.9875	1863
26.6105	777	32.0131	2007	32.0131	2054	26.6105	1493	32.0131	1780	32.0131	1898
26.6309	736	32.0386	2077	32.0386	2071	26.6309	1421	32.0386	1822	32.0386	1834
26.6514	723	32.0642	2114	32.0642	1971	26.6514	1441	32.0642	1878	32.0642	1792
26.6718	765	32.0898	2068	32.0898	1990	26.6718	1496	32.0898	1848	32.0898	1915
26.6923	766	32.1154	2018	32.1154	2002	26.6923	1511	32.1154	1933	32.1154	1882
26.7128	813	32.141	2141	32.141	2039	26.7128	1515	32.141	1813	32.141	1824
26.7332	771	32.1666	2042	32.1666	2054	26.7332	1473	32.1666	1870	32.1666	1883
26.7537	784	32.1921	2039	32.1921	1995	26.7537	1473	32.1921	1928	32.1921	1967
26.7742	772	32.2177	2059	32.2177	1984	26.7742	1534	32.2177	1902	32.2177	1932
26.7946	793	32.2433	2025	32.2433	2044	26.7946	1462	32.2433	1874	32.2433	1973
26.8151	802	32.2689	2032	32.2689	1946	26.8151	1443	32.2689	1852	32.2689	1898
26.8356	753	32.2945	2033	32.2945	2005	26.8356	1479	32.2945	1970	32.2945	1825
26.856	793	32.32	2037	32.32	1979	26.856	1415	32.32	1848	32.32	1923
26.8765	721	32.3456	1990	32.3456	1998	26.8765	1579	32.3456	1939	32.3456	1844
26.897	782	32.3712	2037	32.3712	1985	26.897	1466	32.3712	1837	32.3712	1889
26.9174	791	32.3968	2076	32.3968	2013	26.9174	1478	32.3968	1903	32.3968	1938
26.9379	790	32.4224	2115	32.4224	2081	26.9379	1463	32.4224	1829	32.4224	1826
26.9583	756	32.4479	2095	32.4479	1984	26.9583	1506	32.4479	1766	32.4479	1831
26.9788	760	32.4735	2081	32.4735	2019	26.9788	1415	32.4735	1893	32.4735	1837
26.9993	769	32.4991	2000	32.4991	2031	26.9993	1413	32.4991	1866	32.4991	1891
27.0197	796	32.5247	2107	32.5247	2035	27.0197	1491	32.5247	1764	32.5247	1862
27.0402	781	32.5503	2022	32.5503	1926	27.0402	1491	32.5503	1922	32.5503	1957
27.0607	842	32.5758	1999	32.5758	1987	27.0607	1491	32.5758	1840	32.5758	1831
27.0811	771	32.6014	1985	32.6014	2013	27.0811	1502	32.6014	1843	32.6014	1943
27.1016	794	32.627	2100	32.627	2057	27.1016	1481	32.627	1909	32.627	1907
27.1221	786	32.6526	2019	32.6526	1976	27.1221	1484	32.6526	1871	32.6526	1866
27.1425	802	32.6782	1991	32.6782	2027	27.1425	1495	32.6782	1903	32.6782	1866
27.163	714	32.7037	2068	32.7037	1990	27.163	1460	32.7037	1837	32.7037	1910
27.1835	749	32.7293	2014	32.7293	1970	27.1835	1550	32.7293	1877	32.7293	1968
27.2039	770	32.7549	2168	32.7549	1972	27.2039	1475	32.7549	1839	32.7549	1854
27.2244	753	32.7805	2105	32.7805	2127	27.2244	1487	32.7805	1877	32.7805	1897
27.2449	777	32.8061	1978	32.8061	2019	27.2449	1463	32.8061	1824	32.8061	1840
27.2653	734	32.8316	2074	32.8316	2045	27.2653	1492	32.8316	1889	32.8316	1922
27.2858	801	32.8572	2045	32.8572	1980	27.2858	1458	32.8572	1891	32.8572	1893
27.3062	743	32.8828	2064	32.8828	2052	27.3062	1470	32.8828	1819	32.8828	1896
27.3267	783	32.9084	2142	32.9084	2052	27.3267	1490	32.9084	1967	32.9084	1849
27.3472	759	32.934	2044	32.934	1998	27.3472	1482	32.934	1908	32.934	1881
27.3676	769	32.9595	2068	32.9595	1982	27.3676	1519	32.9595	1820	32.9595	1796
27.3881	747	32.9851	2076	32.9851	2011	27.3881	1490	32.9851	1855	32.9851	1865
27.4086	747	33.0107	2101	33.0107	2012	27.4086	1463	33.0107	1783	33.0107	1832
27.429	742	33.0363	2071	33.0363	2025	27.429	1475	33.0363	1885	33.0363	1853
27.4495	777	33.0619	2098	33.0619	2082	27.4495	1453	33.0619	1888	33.0619	1813
27.47	792	33.0875	2097	33.0875	2012	27.47	1464	33.0875	1850	33.0875	1814
27.4904	797	33.113	2057	33.113	2066	27.4904	1479	33.113	1915	33.113	1983
27.5109	744	33.1386	2084	33.1386	2071	27.5109	1457	33.1386	1859	33.1386	1922
27.5314	762	33.1642	2106	33.1642	2062	27.5314	1555	33.1642	1931	33.1642	1915
27.5518	723	33.1898	2094	33.1898	2020	27.5518	1552	33.1898	1844	33.1898	1882
27.5723	740	33.2154	2050	33.2154	2064	27.5723	1448	33.2154	1839	33.2154	1977
27.5927	724	33.2409	2092	33.2409	2041	27.5927	1445	33.2409	1834	33.2409	1848
27.6132	792	33.2665	2007	33.2665	1952	27.6132	1464	33.2665	1816	33.2665	1854
27.6337	733	33.2921	2058	33.2921	2046	27.6337	1530	33.2921	1874	33.2921	1910
27.6541	746	33.3177	2094	33.3177	1968	27.6541	1462	33.3177	1902	33.3177	1890
27.6746	767	33.3433	2122	33.3433	2038	27.6746	1563	33.3433	1865	33.3433	1879
27.6951	800	33.3688	1986	33.3688	1990	27.6951	1421	33.3688	1911	33.3688	1798
27.7155	778	33.3944	2057	33.3944	2000	27.7155	1493	33.3944	1901	33.3944	1861
27.736	783	33.42	2038	33.42	2008	27.736	1429	33.42	1922	33.42	1847
27.7565	783	33.4456	2164	33.4456	1968	27.7565	1420	33.4456	1854	33.4456	1852
27.7769	738	33.4712	2035	33.4712	1974	27.7769	1517	33.4712	1831	33.4712	1820
27.7974	763	33.4967	2069	33.4967	2040	27.7974	1464	33.4967	1836	33.4967	1910
27.8179	738	33.5223	2139	33.5223	2080	27.8179	1486	33.5223	1887	33.5223	1966
27.8383	783	33.5479	2080	33.5479	2057	27.8383	1443	33.5479	1853	33.5479	1937
27.8588	762	33.5735	2105	33.5735	2008	27.8588	1448	33.5735	1836	33.5735	1879
27.8792	759	33.5991	2026	33.5991	2071	27.8792	1484	33.5991	1893	33.5991	1883
27.8997	787	33.6246	1993	33.6246	2028	27.8997	1458	33.6246	1880	33.6246	1975
27.9202	780	33.6502	2109	33.6502	2093	27.9202	1512	33.6502	1819	33.6502	1924
27.9406	829	33.6758	2101	33.6758	2064	27.9406	1481	33.6758	1863	33.6758	1866
27.9611	791	33.7014	2064	33.7014	1951	27.9611	1498	33.7014	1833	33.7014	1920
27.9816	773	33.727	2105	33.727	2078	27.9816	1443	33.727	1934	33.727	1896
28.002	823	33.7525	2128	33.7525	1935	28.002	1532	33.7525	1825	33.7525	1933
28.0225	761	33.7781	2149	33.7781	2034	28.0225	1491	33.7781	1859	33.7781	1855
28.043	812	33.8037	2065	33.8037	2003	28.043	1413	33.8037	1922	33.8037	1907
28.0634	785	33.8293	2107	33.8293	2031	28.0634	1468	33.8293	1839	33.8293	1861
28.0839	786	33.8549	2181	33.8549	2052	28.0839	1530	33.8549	1901	33.8549	1895
28.1044	742	33.8804	2118	33.8804	1963	28.1044	1494	33.8804	1960	33.8804	1884
28.1248	762	33.906	2087	33.906	2059	28.1248	1477	33.906	1863	33.906	1901
28.1453	744	33.9316	2129	33.9316	1985	28.1453	1505	33.9316	1894	33.9316	1937
28.1658	744	33.9572	2119	33.9572	2000	28.1658	1552	33.9572	1879	33.9572	1922
28.1862	730	33.9828	2106	33.9828	2038	28.1862	1497	33.9828	1901	33.9828	1893
28.2067	756	34.0084	2162	34.0084	2030	28.2067	1452	34.0084	1927	34.0084	1951
28.2271	777	34.0339	2198	34.0339	2069	28.2271	1477	34.0339	1888	34.0339	1935
28.2476	784	34.0595	2098	34.0595	2007	28.2476	1477	34.0595	1946	34.0595	1957
28.2681	773	34.0851	2053	34.0851	2047	28.2681	1421	34.0851	1884	34.0851	1949
28.2885	707	34.1107	2154	34.1107	2082	28.2885	1449	34.1107	1927	34.1107	1914
28.309	724	34.1363	2116	34.1363	2139	28.309	1487	34.1363	1785	34.1363	1846
28.3295	760	34.1618	2121	34.1618	2042	28.3295	1502	34.1618	1890	34.1618	1887
28.3499	759	34.1874	2091	34.1874	2066	28.3499	1497	34.1874	1890	34.1874	1996
28.3704	777	34.213	2113	34.213	2057	28.3704	1466	34.213	1957	34.213	1901
28.3909	774	34.2386	2211	34.2386	2155	28.3909	1545	34.2386	1838	34.2386	1898
28.4113	760	34.2642	2179	34.2642	2042	28.4113	1486	34.2642	1947	34.2642	1921
28.4318	719	34.2897	2135	34.2897	2056	28.4318	1554	34.2897	1974	34.2897	1921
28.4523	786	34.3153	2132	34.3153	2108	28.4523	1493	34.3153	1932	34.3153	1881
28.4727	759	34.3409	2074	34.3409	2126	28.4727	1446	34.3409	1889	34.3409	1901
28.4932	790	34.3665	2194	34.3665	2143	28.4932	1508	34.3665	1990	34.3665	1968
28.5136	760	34.3921	2067	34.3921	2045	28.5136	1533	34.3921	1937	34.3921	1952
28.5341	793	34.4176	2142	34.4176	2074	28.5341	1475	34.4176	2032	34.4176	1990
28.5546	759	34.4432	2133	34.4432	2012	28.5546	1497	34.4432	1966	34.4432	1993
28.575	736	34.4688	2108	34.4688	2044	28.575	1523	34.4688	1969	34.4688	1978
28.5955	751	34.4944	2149	34.4944	2136	28.5955	1523	34.4944	1973	34.4944	1997
28.616	753	34.52	2156	34.52	2101	28.616	1475	34.52	2000	34.52	1938
28.6364	822	34.5455	2112	34.5455	2086	28.6364	1462	34.5455	1994	34.5455	1981
28.6569	742	34.5711	2099	34.5711	2128	28.6569	1491	34.5711	1985	34.5711	2030
28.6774	743	34.5967	2254	34.5967	2000	28.6774	1423	34.5967	1952	34.5967	1956
28.6978	758	34.6223	2127	34.6223	2055	28.6978	1502	34.6223	1937	34.6223	2002
28.7183	770	34.6479	2108	34.6479	2113	28.7183	1497	34.6479	2009	34.6479	2014
28.7388	830	34.6734	2147	34.6734	2118	28.7388	1472	34.6734	2001	34.6734	2007
28.7592	721	34.699	2110	34.699	2053	28.7592	1527	34.699	1970	34.699	2003
28.7797	787	34.7246	2179	34.7246	2068	28.7797	1521	34.7246	2058	34.7246	1963
28.8001	773	34.7502	2141	34.7502	2201	28.8001	1530	34.7502	1970	34.7502	1989
28.8206	798	34.7758	2120	34.7758	2136	28.8206	1476	34.7758	2126	34.7758	1928
28.8411	754	34.8013	2103	34.8013	2070	28.8411	1488	34.8013	2020	34.8013	2046
28.8615	756	34.8269	2236	34.8269	2098	28.8615	1523	34.8269	1966	34.8269	2005
28.882	751	34.8525	2180	34.8525	2202	28.882	1562	34.8525	2030	34.8525	2015
28.9025	750	34.8781	2133	34.8781	2150	28.9025	1444	34.8781	2027	34.8781	2043
28.9229	741	34.9037	2143	34.9037	2130	28.9229	1549	34.9037	2075	34.9037	1996
28.9434	718	34.9293	2088	34.9293	2051	28.9434	1542	34.9293	2043	34.9293	2053
28.9639	735	34.9548	2156	34.9548	2103	28.9639	1529	34.9548	2054	34.9548	2079
28.9843	747	34.9804	2149	34.9804	2133	28.9843	1452	34.9804	2124	34.9804	2142
29.0048	776	35.006	2193	35.006	2155	29.0048	1462	35.006	2114	35.006	2074
29.0253	755	35.0316	2177	35.0316	2238	29.0253	1503	35.0316	1982	35.0316	2148
29.0457	789	35.0572	2177	35.0572	2197	29.0457	1485	35.0572	2107	35.0572	2083
29.0662	819	35.0827	2292	35.0827	2262	29.0662	1497	35.0827	2160	35.0827	2192
29.0867	800	35.1083	2258	35.1083	2152	29.0867	1491	35.1083	2131	35.1083	2238
29.1071	760	35.1339	2240	35.1339	2268	29.1071	1510	35.1339	2230	35.1339	2250
29.1276	790	35.1595	2262	35.1595	2247	29.1276	1488	35.1595	2184	35.1595	2318
29.148	777	35.1851	2352	35.1851	2370	29.148	1436	35.1851	2303	35.1851	2345
29.1685	765	35.2106	2326	35.2106	2387	29.1685	1482	35.2106	2256	35.2106	2446
29.189	725	35.2362	2435	35.2362	2523	29.189	1514	35.2362	2353	35.2362	2447
29.2094	763	35.2618	2534	35.2618	2709	29.2094	1488	35.2618	2366	35.2618	2493
29.2299	796	35.2874	2763	35.2874	2868	29.2299	1545	35.2874	2539	35.2874	2584
29.2504	771	35.313	2776	35.313	3174	29.2504	1515	35.313	2513	35.313	2662
29.2708	784	35.3385	3219	35.3385	3669	29.2708	1514	35.3385	2520	35.3385	2673
29.2913	752	35.3641	3419	35.3641	3996	29.2913	1486	35.3641	2657	35.3641	2753
29.3118	763	35.3897	3975	35.3897	4482	29.3118	1531	35.3897	2783	35.3897	2801
29.3322	804	35.4153	4434	35.4153	4935	29.3322	1495	35.4153	2746	35.4153	2899
29.3527	777	35.4409	4862	35.4409	5072	29.3527	1506	35.4409	2782	35.4409	2922
29.3732	819	35.4664	5344	35.4664	5039	29.3732	1542	35.4664	2785	35.4664	2894
29.3936	780	35.492	5272	35.492	4820	29.3936	1513	35.492	2883	35.492	2942
29.4141	745	35.5176	5045	35.5176	4396	29.4141	1597	35.5176	2745	35.5176	2874
29.4345	809	35.5432	4836	35.5432	4013	29.4345	1534	35.5432	2756	35.5432	2856
29.455	800	35.5688	4255	35.5688	3645	29.455	1454	35.5688	2838	35.5688	2783
29.4755	807	35.5943	3907	35.5943	3211	29.4755	1521	35.5943	2772	35.5943	2734
29.4959	808	35.6199	3534	35.6199	2858	29.4959	1615	35.6199	2775	35.6199	2734
29.5164	789	35.6455	3098	35.6455	2693	29.5164	1585	35.6455	2616	35.6455	2711
29.5369	762	35.6711	2917	35.6711	2496	29.5369	1561	35.6711	2657	35.6711	2651
29.5573	724	35.6967	2626	35.6967	2420	29.5573	1564	35.6967	2687	35.6967	2674
29.5778	781	35.7222	2624	35.7222	2309	29.5778	1540	35.7222	2629	35.7222	2625
29.5983	715	35.7478	2387	35.7478	2281	29.5983	1547	35.7478	2534	35.7478	2519
29.6187	754	35.7734	2412	35.7734	2246	29.6187	1519	35.7734	2460	35.7734	2483
29.6392	710	35.799	2397	35.799	2202	29.6392	1604	35.799	2454	35.799	2429
29.6597	790	35.8246	2346	35.8246	2187	29.6597	1667	35.8246	2409	35.8246	2352
29.6801	743	35.8502	2259	35.8502	2161	29.6801	1553	35.8502	2410	35.8502	2343
29.7006	780	35.8757	2226	35.8757	2117	29.7006	1654	35.8757	2336	35.8757	2246
29.721	796	35.9013	2219	35.9013	2142	29.721	1591	35.9013	2256	35.9013	2340
29.7415	781	35.9269	2192	35.9269	2201	29.7415	1605	35.9269	2271	35.9269	2271
29.762	785	35.9525	2183	35.9525	2109	29.762	1642	35.9525	2277	35.9525	2281
29.7824	790	35.9781	2125	35.9781	2066	29.7824	1568	35.9781	2144	35.9781	2094
29.8029	716	36.0036	2211	36.0036	2060	29.8029	1580	36.0036	2154	36.0036	2263
29.8234	782	36.0292	2166	36.0292	2115	29.8234	1557	36.0292	2152	36.0292	2213
29.8438	785	36.0548	2178	36.0548	2088	29.8438	1626	36.0548	2018	36.0548	2065
29.8643	779	36.0804	2171	36.0804	2137	29.8643	1650	36.0804	2057	36.0804	2066
29.8848	774	36.106	2188	36.106	2101	29.8848	1677	36.106	2081	36.106	2047
29.9052	794	36.1315	2150	36.1315	2131	29.9052	1627	36.1315	2169	36.1315	2091
29.9257	799	36.1571	2186	36.1571	2069	29.9257	1666	36.1571	2044	36.1571	2123
29.9462	809	36.1827	2203	36.1827	2125	29.9462	1665	36.1827	2037	36.1827	2089
29.9666	831	36.2083	2146	36.2083	2075	29.9666	1654	36.2083	2002	36.2083	1963
29.9871	775	36.2339	2164	36.2339	2088	29.9871	1679	36.2339	1959	36.2339	2016
30.0076	820	36.2594	2171	36.2594	2029	30.0076	1655	36.2594	2016	36.2594	2028
30.028	816	36.285	2098	36.285	1977	30.028	1662	36.285	1992	36.285	2075
30.0485	847	36.3106	2129	36.3106	2000	30.0485	1650	36.3106	1915	36.3106	2056
30.0689	835	36.3362	2154	36.3362	2118	30.0689	1710	36.3362	1972	36.3362	2016
30.0894	903	36.3618	2139	36.3618	2105	30.0894	1665	36.3618	1991	36.3618	2079
30.1099	902	36.3873	2221	36.3873	2109	30.1099	1638	36.3873	2029	36.3873	1985
30.1303	883	36.4129	2184	36.4129	1975	30.1303	1607	36.4129	1921	36.4129	1968
30.1508	834	36.4385	2217	36.4385	2094	30.1508	1660	36.4385	1991	36.4385	2005
30.1713	922	36.4641	2104	36.4641	2055	30.1713	1643	36.4641	1986	36.4641	1945
30.1917	891	36.4897	2183	36.4897	2044	30.1917	1666	36.4897	1973	36.4897	1944
30.2122	857	36.5152	2165	36.5152	2143	30.2122	1643	36.5152	1909	36.5152	2007
30.2327	862	36.5408	2168	36.5408	2110	30.2327	1646	36.5408	2033	36.5408	1925
30.2531	842	36.5664	2124	36.5664	2011	30.2531	1666	36.5664	1953	36.5664	1996
30.2736	840	36.592	2106	36.592	2077	30.2736	1613	36.592	1952	36.592	1952
30.2941	837	36.6176	2066	36.6176	2119	30.2941	1566	36.6176	1979	36.6176	2031
30.3145	862	36.6431	2080	36.6431	2080	30.3145	1614	36.6431	2021	36.6431	2003
30.335	853	36.6687	2185	36.6687	2081	30.335	1576	36.6687	1998	36.6687	2008
30.3554	815	36.6943	2147	36.6943	2107	30.3554	1620	36.6943	1981	36.6943	2042
30.3759	803	36.7199	2084	36.7199	2022	30.3759	1645	36.7199	2020	36.7199	2012
30.3964	840	36.7455	2088	36.7455	2107	30.3964	1702	36.7455	1907	36.7455	1995
30.4168	816	36.7711	2071	36.7711	2175	30.4168	1605	36.7711	2021	36.7711	2054
30.4373	774	36.7966	2107	36.7966	2088	30.4373	1583	36.7966	1986	36.7966	1991
30.4578	781	36.8222	2149	36.8222	2062	30.4578	1549	36.8222	1944	36.8222	2001
30.4782	777	36.8478	2199	36.8478	2030	30.4782	1618	36.8478	2012	36.8478	2086
30.4987	795	36.8734	2200	36.8734	2120	30.4987	1521	36.8734	1925	36.8734	1986
30.5192	779	36.899	2131	36.899	2123	30.5192	1640	36.899	1995	36.899	1958
30.5396	756	36.9245	2182	36.9245	2119	30.5396	1547	36.9245	2028	36.9245	1968
30.5601	776	36.9501	2216	36.9501	2086	30.5601	1498	36.9501	1926	36.9501	2014
30.5806	737	36.9757	2295	36.9757	2179	30.5806	1533	36.9757	1971	36.9757	2001
30.601	766	37.0013	2161	37.0013	2171	30.601	1572	37.0013	2019	37.0013	2053
30.6215	792	37.0269	2274	37.0269	2250	30.6215	1554	37.0269	2028	37.0269	1922
30.6419	788	37.0524	2288	37.0524	2259	30.6419	1536	37.0524	2007	37.0524	2064
30.6624	758	37.078	2336	37.078	2213	30.6624	1545	37.078	2047	37.078	1974
30.6829	762	37.1036	2298	37.1036	2259	30.6829	1559	37.1036	2030	37.1036	2110
30.7033	773	37.1292	2309	37.1292	2237	30.7033	1550	37.1292	2075	37.1292	2069
30.7238	792	37.1548	2451	37.1548	2270	30.7238	1487	37.1548	1955	37.1548	1957
30.7443	815	37.1803	2351	37.1803	2208	30.7443	1605	37.1803	1960	37.1803	1997
30.7647	734	37.2059	2168	37.2059	2121	30.7647	1535	37.2059	1928	37.2059	2007
30.7852	727	37.2315	2222	37.2315	2104	30.7852	1518	37.2315	1967	37.2315	2027
30.8057	791	37.2571	2233	37.2571	2142	30.8057	1539	37.2571	1944	37.2571	2076
30.8261	816	37.2827	2192	37.2827	2147	30.8261	1537	37.2827	2063	37.2827	2026
30.8466	843	37.3082	2177	37.3082	2066	30.8466	1551	37.3082	1957	37.3082	1960
30.8671	723	37.3338	2146	37.3338	2050	30.8671	1530	37.3338	1920	37.3338	2046
30.8875	815	37.3594	2161	37.3594	1952	30.8875	1455	37.3594	1961	37.3594	2038
30.908	777	37.385	2131	37.385	2098	30.908	1465	37.385	1978	37.385	1927
30.9285	769	37.4106	2092	37.4106	2076	30.9285	1507	37.4106	1953	37.4106	1965
30.9489	764	37.4361	2098	37.4361	2134	30.9489	1578	37.4361	2016	37.4361	1952
30.9694	726	37.4617	2109	37.4617	2088	30.9694	1535	37.4617	1935	37.4617	1933
30.9898	733	37.4873	2075	37.4873	2034	30.9898	1494	37.4873	1916	37.4873	1977
31.0103	743	37.5129	2067	37.5129	2052	31.0103	1520	37.5129	1883	37.5129	2039
31.0308	766	37.5385	2134	37.5385	2077	31.0308	1491	37.5385	1921	37.5385	1938
31.0512	719	37.564	2058	37.564	2107	31.0512	1502	37.564	2047	37.564	1940
31.0717	749	37.5896	2151	37.5896	2004	31.0717	1506	37.5896	2042	37.5896	2020
31.0922	715	37.6152	2125	37.6152	1998	31.0922	1548	37.6152	1892	37.6152	1984
31.1126	812	37.6408	2061	37.6408	2047	31.1126	1471	37.6408	1967	37.6408	1940
31.1331	790	37.6664	2202	37.6664	2014	31.1331	1515	37.6664	1939	37.6664	1928
31.1536	758	37.692	2149	37.692	2083	31.1536	1483	37.692	1922	37.692	1905
31.174	840	37.7175	2167	37.7175	2079	31.174	1473	37.7175	1895	37.7175	2006
31.1945	790	37.7431	2102	37.7431	2074	31.1945	1506	37.7431	1914	37.7431	1935
31.215	743	37.7687	2156	37.7687	2057	31.215	1533	37.7687	1968	37.7687	1950
31.2354	733	37.7943	2146	37.7943	2022	31.2354	1573	37.7943	1969	37.7943	1947
31.2559	743	37.8199	2079	37.8199	2046	31.2559	1434	37.8199	1949	37.8199	1965
31.2763	777	37.8454	2138	37.8454	2056	31.2763	1503	37.8454	1976	37.8454	2070
31.2968	759	37.871	2122	37.871	1994	31.2968	1471	37.871	1996	37.871	1940
31.3173	744	37.8966	2081	37.8966	1997	31.3173	1575	37.8966	1872	37.8966	1983
31.3377	773	37.9222	2142	37.9222	2052	31.3377	1615	37.9222	1909	37.9222	1818
31.3582	756	37.9478	2030	37.9478	2074	31.3582	1532	37.9478	1965	37.9478	1902
31.3787	726	37.9733	2099	37.9733	2002	31.3787	1496	37.9733	1901	37.9733	2034
31.3991	746	37.9989	2222	37.9989	2070	31.3991	1423	37.9989	1874	37.9989	1896
31.4196	785	38.0245	2106	38.0245	2077	31.4196	1530	38.0245	1901	38.0245	1961
31.4401	812	38.0501	2106	38.0501	2034	31.4401	1562	38.0501	1915	38.0501	1959
31.4605	727	38.0757	2092	38.0757	2036	31.4605	1514	38.0757	1940	38.0757	1991
31.481	776	38.1012	2123	38.1012	2132	31.481	1429	38.1012	1929	38.1012	1943
31.5015	824	38.1268	2071	38.1268	2063	31.5015	1523	38.1268	1890	38.1268	2000
31.5219	801	38.1524	2151	38.1524	2082	31.5219	1548	38.1524	1975	38.1524	1962
31.5424	840	38.178	2132	38.178	1985	31.5424	1593	38.178	1927	38.178	2025
31.5628	732	38.2036	2097	38.2036	2034	31.5628	1515	38.2036	1872	38.2036	1862
31.5833	775	38.2291	2157	38.2291	2054	31.5833	1455	38.2291	1895	38.2291	1961
31.6038	706	38.2547	2127	38.2547	2105	31.6038	1582	38.2547	1961	38.2547	1908
31.6242	714	38.2803	2160	38.2803	2065	31.6242	1521	38.2803	1979	38.2803	1969
31.6447	763	38.3059	2120	38.3059	2043	31.6447	1546	38.3059	1998	38.3059	2004
31.6652	747	38.3315	2111	38.3315	2068	31.6652	1515	38.3315	1950	38.3315	1961
31.6856	764	38.357	2121	38.357	2086	31.6856	1492	38.357	1974	38.357	1944
31.7061	778	38.3826	2099	38.3826	2168	31.7061	1537	38.3826	2028	38.3826	1933
31.7266	770	38.4082	2049	38.4082	1975	31.7266	1463	38.4082	1867	38.4082	1840
31.747	802	38.4338	2111	38.4338	2082	31.747	1502	38.4338	1836	38.4338	1900
31.7675	775	38.4594	2147	38.4594	2062	31.7675	1546	38.4594	1934	38.4594	1932
31.788	751	38.4849	2111	38.4849	2086	31.788	1576	38.4849	1915	38.4849	1909
31.8084	756	38.5105	2143	38.5105	2088	31.8084	1542	38.5105	1949	38.5105	1984
31.8289	785	38.5361	2158	38.5361	2118	31.8289	1514	38.5361	1989	38.5361	1974
31.8494	755	38.5617	2069	38.5617	2130	31.8494	1551	38.5617	1931	38.5617	1978
31.8698	768	38.5873	2122	38.5873	2053	31.8698	1486	38.5873	1941	38.5873	1958
31.8903	781	38.6129	2149	38.6129	2043	31.8903	1516	38.6129	1904	38.6129	1985
31.9107	804	38.6384	2122	38.6384	2057	31.9107	1499	38.6384	1911	38.6384	2030
31.9312	768	38.664	2170	38.664	2007	31.9312	1477	38.664	1924	38.664	1976
31.9517	802	38.6896	2038	38.6896	2094	31.9517	1536	38.6896	1938	38.6896	1941
31.9721	784	38.7152	2167	38.7152	2059	31.9721	1493	38.7152	1963	38.7152	2017
31.9926	776	38.7408	2182	38.7408	2080	31.9926	1598	38.7408	1932	38.7408	1938
32.0131	737	38.7663	2190	38.7663	2092	32.0131	1514	38.7663	1943	38.7663	1961
32.0335	738	38.7919	2197	38.7919	2096	32.0335	1564	38.7919	1955	38.7919	1952
32.054	773	38.8175	2169	38.8175	2003	32.054	1579	38.8175	1894	38.8175	1901
32.0745	745	38.8431	2154	38.8431	1970	32.0745	1485	38.8431	2004	38.8431	2053
32.0949	773	38.8687	2135	38.8687	2048	32.0949	1519	38.8687	1913	38.8687	1967
32.1154	765	38.8942	2174	38.8942	2073	32.1154	1580	38.8942	1888	38.8942	2024
32.1359	768	38.9198	2124	38.9198	2057	32.1359	1535	38.9198	1966	38.9198	1919
32.1563	774	38.9454	2131	38.9454	2112	32.1563	1523	38.9454	1905	38.9454	1998
32.1768	769	38.971	2101	38.971	2161	32.1768	1558	38.971	1976	38.971	1997
32.1972	707	38.9966	2190	38.9966	2015	32.1972	1581	38.9966	1947	38.9966	1918
32.2177	749	39.0221	2079	39.0221	2001	32.2177	1472	39.0221	1885	39.0221	1968
32.2382	724	39.0477	2169	39.0477	2021	32.2382	1536	39.0477	1949	39.0477	1967
32.2586	731	39.0733	2227	39.0733	2090	32.2586	1644	39.0733	1879	39.0733	2042
32.2791	752	39.0989	2109	39.0989	2009	32.2791	1567	39.0989	1899	39.0989	1923
32.2996	780	39.1245	2125	39.1245	2049	32.2996	1568	39.1245	1893	39.1245	1929
32.32	768	39.15	2147	39.15	2066	32.32	1578	39.15	1937	39.15	1984
32.3405	765	39.1756	2179	39.1756	2101	32.3405	1482	39.1756	1974	39.1756	1895
32.361	739	39.2012	2125	39.2012	2085	32.361	1533	39.2012	1966	39.2012	1953
32.3814	746	39.2268	2092	39.2268	2114	32.3814	1561	39.2268	1945	39.2268	1901
32.4019	738	39.2524	2101	39.2524	2084	32.4019	1530	39.2524	1914	39.2524	1980
32.4224	777	39.2779	2236	39.2779	2094	32.4224	1525	39.2779	1956	39.2779	1935
32.4428	730	39.3035	2096	39.3035	2079	32.4428	1500	39.3035	1916	39.3035	1996
32.4633	797	39.3291	2180	39.3291	2011	32.4633	1530	39.3291	2031	39.3291	1983
32.4837	762	39.3547	2178	39.3547	2088	32.4837	1480	39.3547	1949	39.3547	1959
32.5042	810	39.3803	2175	39.3803	2075	32.5042	1434	39.3803	1911	39.3803	2013
32.5247	768	39.4058	2165	39.4058	2048	32.5247	1544	39.4058	1948	39.4058	1986
32.5451	808	39.4314	2144	39.4314	1991	32.5451	1521	39.4314	1903	39.4314	1997
32.5656	763	39.457	2116	39.457	2110	32.5656	1489	39.457	1944	39.457	1931
32.5861	769	39.4826	2058	39.4826	1990	32.5861	1511	39.4826	1919	39.4826	2011
32.6065	784	39.5082	2150	39.5082	2038	32.6065	1493	39.5082	1937	39.5082	2018
32.627	769	39.5338	2191	39.5338	2079	32.627	1521	39.5338	1971	39.5338	1894
32.6475	792	39.5593	2084	39.5593	2096	32.6475	1565	39.5593	2014	39.5593	1928
32.6679	754	39.5849	2078	39.5849	2043	32.6679	1502	39.5849	1894	39.5849	1967
32.6884	785	39.6105	2060	39.6105	2020	32.6884	1534	39.6105	1922	39.6105	2015
32.7089	770	39.6361	2107	39.6361	1959	32.7089	1598	39.6361	1951	39.6361	1898
32.7293	779	39.6617	2127	39.6617	2046	32.7293	1453	39.6617	1955	39.6617	1981
32.7498	712	39.6872	2118	39.6872	2002	32.7498	1514	39.6872	1949	39.6872	1945
32.7703	802	39.7128	2185	39.7128	2026	32.7703	1539	39.7128	1967	39.7128	2003
32.7907	768	39.7384	2165	39.7384	2055	32.7907	1580	39.7384	1936	39.7384	1948
32.8112	769	39.764	2134	39.764	2088	32.8112	1602	39.764	1964	39.764	1940
32.8316	724	39.7896	2155	39.7896	2080	32.8316	1497	39.7896	1952	39.7896	1993
32.8521	784	39.8151	2197	39.8151	2169	32.8521	1487	39.8151	2009	39.8151	2036
32.8726	761	39.8407	2078	39.8407	2149	32.8726	1487	39.8407	1896	39.8407	2044
32.893	784	39.8663	2168	39.8663	2079	32.893	1507	39.8663	1954	39.8663	1964
32.9135	727	39.8919	2121	39.8919	1990	32.9135	1577	39.8919	2013	39.8919	2037
32.934	772	39.9175	2160	39.9175	2108	32.934	1556	39.9175	1962	39.9175	2061
32.9544	780	39.943	2179	39.943	2130	32.9544	1477	39.943	1927	39.943	2041
32.9749	789	39.9686	2112	39.9686	2064	32.9749	1597	39.9686	1984	39.9686	2007
32.9954	716	39.9942	2254	39.9942	2021	32.9954	1507	39.9942	1887	39.9942	1938
33.0158	759	40.0198	2128	40.0198	2049	33.0158	1618	40.0198	1963	40.0198	2113
33.0363	730	40.0454	2128	40.0454	2097	33.0363	1544	40.0454	1955	40.0454	1981
33.0568	818	40.0709	2143	40.0709	2010	33.0568	1527	40.0709	1924	40.0709	1955
33.0772	741	40.0965	2178	40.0965	2039	33.0772	1527	40.0965	1973	40.0965	1952
33.0977	776	40.1221	2171	40.1221	2057	33.0977	1592	40.1221	1973	40.1221	1900
33.1181	716	40.1477	2171	40.1477	2071	33.1181	1502	40.1477	2041	40.1477	1998
33.1386	713	40.1733	2133	40.1733	1989	33.1386	1544	40.1733	1925	40.1733	1985
33.1591	759	40.1988	2045	40.1988	2173	33.1591	1578	40.1988	2008	40.1988	1958
33.1795	745	40.2244	2153	40.2244	2078	33.1795	1552	40.2244	2023	40.2244	2004
33.2	731	40.25	2143	40.25	2094	33.2	1526	40.25	1919	40.25	2083
33.2205	744	40.2756	2105	40.2756	2108	33.2205	1602	40.2756	1919	40.2756	1993
33.2409	793	40.3012	2122	40.3012	2009	33.2409	1560	40.3012	2014	40.3012	2001
33.2614	738	40.3267	2117	40.3267	1987	33.2614	1573	40.3267	2031	40.3267	1996
33.2819	726	40.3523	2113	40.3523	2014	33.2819	1549	40.3523	2069	40.3523	1989
33.3023	731	40.3779	2157	40.3779	2052	33.3023	1510	40.3779	1988	40.3779	2013
33.3228	770	40.4035	2152	40.4035	2149	33.3228	1534	40.4035	1943	40.4035	1952
33.3433	776	40.4291	2085	40.4291	2092	33.3433	1586	40.4291	1954	40.4291	2045
33.3637	746	40.4547	2088	40.4547	2095	33.3637	1490	40.4547	1973	40.4547	1953
33.3842	753	40.4802	2163	40.4802	2058	33.3842	1520	40.4802	2049	40.4802	2034
33.4046	728	40.5058	2142	40.5058	2064	33.4046	1602	40.5058	1985	40.5058	2014
33.4251	729	40.5314	2158	40.5314	2175	33.4251	1538	40.5314	1911	40.5314	1987
33.4456	780	40.557	2100	40.557	2124	33.4456	1611	40.557	1881	40.557	2020
33.466	760	40.5826	2089	40.5826	2086	33.466	1537	40.5826	1879	40.5826	1988
33.4865	725	40.6081	2098	40.6081	2086	33.4865	1450	40.6081	1977	40.6081	1956
33.507	748	40.6337	2127	40.6337	2116	33.507	1617	40.6337	1968	40.6337	2001
33.5274	701	40.6593	2262	40.6593	2114	33.5274	1546	40.6593	2002	40.6593	1995
33.5479	716	40.6849	2166	40.6849	2065	33.5479	1554	40.6849	2022	40.6849	2030
33.5684	725	40.7105	2096	40.7105	2103	33.5684	1509	40.7105	2018	40.7105	1971
33.5888	773	40.736	2169	40.736	2100	33.5888	1538	40.736	1973	40.736	1953
33.6093	751	40.7616	2158	40.7616	2085	33.6093	1543	40.7616	1955	40.7616	2043
33.6298	840	40.7872	2185	40.7872	2088	33.6298	1561	40.7872	1954	40.7872	2010
33.6502	732	40.8128	2139	40.8128	2014	33.6502	1559	40.8128	1920	40.8128	2062
33.6707	749	40.8384	2188	40.8384	2175	33.6707	1600	40.8384	2034	40.8384	1966
33.6912	735	40.8639	2186	40.8639	2095	33.6912	1599	40.8639	1880	40.8639	1965
33.7116	788	40.8895	2144	40.8895	2033	33.7116	1550	40.8895	2034	40.8895	2048
33.7321	730	40.9151	2187	40.9151	2162	33.7321	1569	40.9151	1966	40.9151	1997
33.7525	780	40.9407	2198	40.9407	2107	33.7525	1506	40.9407	1874	40.9407	1924
33.773	745	40.9663	2106	40.9663	2128	33.773	1470	40.9663	1984	40.9663	1981
33.7935	718	40.9918	2040	40.9918	2106	33.7935	1583	40.9918	2028	40.9918	2065
33.8139	799	41.0174	2171	41.0174	2057	33.8139	1519	41.0174	1998	41.0174	1990
33.8344	791	41.043	2237	41.043	2077	33.8344	1526	41.043	1997	41.043	1939
33.8549	728	41.0686	2133	41.0686	2106	33.8549	1514	41.0686	1916	41.0686	2094
33.8753	772	41.0942	2134	41.0942	2138	33.8753	1568	41.0942	2020	41.0942	1974
33.8958	769	41.1197	2101	41.1197	2074	33.8958	1536	41.1197	1946	41.1197	2017
33.9163	679	41.1453	2191	41.1453	1951	33.9163	1548	41.1453	1970	41.1453	2036
33.9367	774	41.1709	2185	41.1709	2089	33.9367	1552	41.1709	1923	41.1709	2044
33.9572	787	41.1965	2137	41.1965	2184	33.9572	1603	41.1965	1943	41.1965	2025
33.9777	778	41.2221	2129	41.2221	2092	33.9777	1621	41.2221	2018	41.2221	2072
33.9981	746	41.2476	2159	41.2476	2033	33.9981	1491	41.2476	1917	41.2476	1936
34.0186	754	41.2732	2216	41.2732	2145	34.0186	1586	41.2732	1944	41.2732	1964
34.039	750	41.2988	2133	41.2988	2035	34.039	1558	41.2988	1965	41.2988	1968
34.0595	766	41.3244	2187	41.3244	2056	34.0595	1600	41.3244	2054	41.3244	1992
34.08	801	41.35	2216	41.35	2067	34.08	1526	41.35	1997	41.35	2025
34.1004	704	41.3756	2151	41.3756	2057	34.1004	1567	41.3756	1872	41.3756	2037
34.1209	788	41.4011	2155	41.4011	2164	34.1209	1547	41.4011	2020	41.4011	2045
34.1414	726	41.4267	2198	41.4267	2067	34.1414	1594	41.4267	2018	41.4267	1987
34.1618	756	41.4523	2061	41.4523	2083	34.1618	1542	41.4523	2001	41.4523	2067
34.1823	761	41.4779	2159	41.4779	2132	34.1823	1589	41.4779	1963	41.4779	1981
34.2028	674	41.5035	2208	41.5035	2098	34.2028	1565	41.5035	1966	41.5035	2051
34.2232	751	41.529	2123	41.529	2016	34.2232	1550	41.529	1938	41.529	2005
34.2437	788	41.5546	2167	41.5546	2126	34.2437	1581	41.5546	2012	41.5546	2043
34.2642	739	41.5802	2141	41.5802	2061	34.2642	1689	41.5802	1925	41.5802	1978
34.2846	736	41.6058	2212	41.6058	2132	34.2846	1614	41.6058	1936	41.6058	1980
34.3051	748	41.6314	2225	41.6314	2095	34.3051	1576	41.6314	2024	41.6314	2067
34.3255	762	41.6569	2093	41.6569	2148	34.3255	1502	41.6569	1990	41.6569	2058
34.346	748	41.6825	2163	41.6825	2092	34.346	1610	41.6825	2087	41.6825	2030
34.3665	799	41.7081	2241	41.7081	2106	34.3665	1638	41.7081	1975	41.7081	2066
34.3869	809	41.7337	2154	41.7337	2101	34.3869	1571	41.7337	1960	41.7337	2124
34.4074	764	41.7593	2132	41.7593	2077	34.4074	1534	41.7593	2017	41.7593	1905
34.4279	728	41.7848	2215	41.7848	2111	34.4279	1601	41.7848	2010	41.7848	1979
34.4483	714	41.8104	2182	41.8104	2094	34.4483	1588	41.8104	1949	41.8104	2017
34.4688	744	41.836	2163	41.836	2061	34.4688	1619	41.836	1979	41.836	2068
34.4893	750	41.8616	2075	41.8616	2058	34.4893	1542	41.8616	2025	41.8616	2017
34.5097	700	41.8872	2142	41.8872	2098	34.5097	1632	41.8872	1965	41.8872	2018
34.5302	754	41.9127	2149	41.9127	2073	34.5302	1562	41.9127	1938	41.9127	2003
34.5507	710	41.9383	2189	41.9383	2142	34.5507	1648	41.9383	1917	41.9383	1974
34.5711	797	41.9639	2232	41.9639	2114	34.5711	1615	41.9639	2038	41.9639	2029
34.5916	746	41.9895	2195	41.9895	2080	34.5916	1707	41.9895	1873	41.9895	1945
34.6121	770	42.0151	2186	42.0151	2036	34.6121	1611	42.0151	1995	42.0151	2039
34.6325	738	42.0406	2195	42.0406	2033	34.6325	1652	42.0406	2022	42.0406	1932
34.653	794	42.0662	2203	42.0662	1999	34.653	1611	42.0662	2046	42.0662	2029
34.6734	758	42.0918	2129	42.0918	2071	34.6734	1568	42.0918	2003	42.0918	2010
34.6939	760	42.1174	2142	42.1174	2162	34.6939	1593	42.1174	1967	42.1174	2045
34.7144	742	42.143	2118	42.143	2118	34.7144	1692	42.143	1903	42.143	1975
34.7348	771	42.1685	2197	42.1685	2081	34.7348	1591	42.1685	1943	42.1685	2051
34.7553	779	42.1941	2149	42.1941	2073	34.7553	1635	42.1941	2006	42.1941	1953
34.7758	726	42.2197	2261	42.2197	2098	34.7758	1601	42.2197	1945	42.2197	2058
34.7962	753	42.2453	2152	42.2453	2139	34.7962	1687	42.2453	2048	42.2453	2044
34.8167	791	42.2709	2142	42.2709	2111	34.8167	1725	42.2709	1993	42.2709	1993
34.8372	774	42.2965	2159	42.2965	2143	34.8372	1703	42.2965	2032	42.2965	2124
34.8576	756	42.322	2180	42.322	2088	34.8576	1728	42.322	2023	42.322	2047
34.8781	751	42.3476	2159	42.3476	2012	34.8781	1796	42.3476	1996	42.3476	2045
34.8986	772	42.3732	2086	42.3732	2048	34.8986	1778	42.3732	1999	42.3732	2021
34.919	764	42.3988	2138	42.3988	2163	34.919	1731	42.3988	2034	42.3988	2135
34.9395	723	42.4244	2119	42.4244	2053	34.9395	1787	42.4244	1977	42.4244	2118
34.9599	800	42.4499	2165	42.4499	2106	34.9599	1803	42.4499	2026	42.4499	2062
34.9804	746	42.4755	2166	42.4755	2154	34.9804	1831	42.4755	1999	42.4755	1995
35.0009	814	42.5011	2120	42.5011	2105	35.0009	1849	42.5011	1996	42.5011	2095
35.0213	777	42.5267	2188	42.5267	2076	35.0213	1948	42.5267	1978	42.5267	2067
35.0418	769	42.5523	2185	42.5523	2139	35.0418	1860	42.5523	1950	42.5523	2097
35.0623	817	42.5778	2156	42.5778	2055	35.0623	1869	42.5778	1996	42.5778	2064
35.0827	807	42.6034	2178	42.6034	2151	35.0827	1844	42.6034	1997	42.6034	2031
35.1032	804	42.629	2146	42.629	2129	35.1032	1979	42.629	2017	42.629	2025
35.1237	780	42.6546	2257	42.6546	2092	35.1237	1972	42.6546	2093	42.6546	2047
35.1441	822	42.6802	2197	42.6802	2117	35.1441	1986	42.6802	2037	42.6802	2019
35.1646	778	42.7057	2173	42.7057	2111	35.1646	1955	42.7057	2008	42.7057	2100
35.1851	763	42.7313	2145	42.7313	2151	35.1851	2048	42.7313	2082	42.7313	2127
35.2055	823	42.7569	2248	42.7569	2072	35.2055	2027	42.7569	2014	42.7569	2038
35.226	837	42.7825	2239	42.7825	2144	35.226	2145	42.7825	2006	42.7825	2078
35.2464	896	42.8081	2119	42.8081	2209	35.2464	2189	42.8081	2024	42.8081	2041
35.2669	843	42.8336	2220	42.8336	2210	35.2669	2115	42.8336	2028	42.8336	2148
35.2874	929	42.8592	2241	42.8592	2169	35.2874	2169	42.8592	2064	42.8592	2169
35.3078	926	42.8848	2201	42.8848	2249	35.3078	2224	42.8848	2125	42.8848	2116
35.3283	1019	42.9104	2288	42.9104	2256	35.3283	2279	42.9104	2067	42.9104	2149
35.3488	1025	42.936	2298	42.936	2296	35.3488	2214	42.936	2106	42.936	2117
35.3692	1018	42.9615	2313	42.9615	2319	35.3692	2195	42.9615	2067	42.9615	2237
35.3897	1096	42.9871	2421	42.9871	2421	35.3897	2203	42.9871	2164	42.9871	2137
35.4102	1127	43.0127	2499	43.0127	2629	35.4102	2206	43.0127	2119	43.0127	2198
35.4306	1195	43.0383	2646	43.0383	2611	35.4306	2234	43.0383	2167	43.0383	2072
35.4511	1237	43.0639	2828	43.0639	2737	35.4511	2168	43.0639	2258	43.0639	2215
35.4716	1289	43.0894	2769	43.0894	2661	35.4716	2260	43.0894	2083	43.0894	2145
35.492	1286	43.115	2847	43.115	2707	35.492	2289	43.115	2103	43.115	2237
35.5125	1268	43.1406	2825	43.1406	2598	35.5125	2224	43.1406	2200	43.1406	2196
35.533	1280	43.1662	2777	43.1662	2481	35.533	2089	43.1662	2216	43.1662	2156
35.5534	1224	43.1918	2610	43.1918	2567	35.5534	2242	43.1918	2210	43.1918	2142
35.5739	1208	43.2174	2613	43.2174	2507	35.5739	2161	43.2174	2162	43.2174	2212
35.5943	1096	43.2429	2473	43.2429	2347	35.5943	2103	43.2429	2090	43.2429	2193
35.6148	1095	43.2685	2430	43.2685	2222	35.6148	2155	43.2685	2216	43.2685	2182
35.6353	1039	43.2941	2286	43.2941	2123	35.6353	2135	43.2941	2213	43.2941	2221
35.6557	1050	43.3197	2278	43.3197	2190	35.6557	2011	43.3197	2138	43.3197	2172
35.6762	967	43.3453	2310	43.3453	2215	35.6762	2060	43.3453	2134	43.3453	2296
35.6967	953	43.3708	2227	43.3708	2213	35.6967	2033	43.3708	2074	43.3708	2198
35.7171	875	43.3964	2244	43.3964	2151	35.7171	1912	43.3964	2012	43.3964	2117
35.7376	870	43.422	2249	43.422	2090	35.7376	2037	43.422	2087	43.422	2137
35.7581	850	43.4476	2208	43.4476	2092	35.7581	1871	43.4476	2129	43.4476	2208
35.7785	833	43.4732	2129	43.4732	2106	35.7785	1944	43.4732	2016	43.4732	2074
35.799	830	43.4987	2283	43.4987	2086	35.799	1819	43.4987	2059	43.4987	2104
35.8195	823	43.5243	2223	43.5243	2126	35.8195	1921	43.5243	2071	43.5243	2067
35.8399	844	43.5499	2107	43.5499	2081	35.8399	1893	43.5499	1963	43.5499	2132
35.8604	807	43.5755	2161	43.5755	2097	35.8604	1831	43.5755	2028	43.5755	2138
35.8808	748	43.6011	2226	43.6011	2066	35.8808	1786	43.6011	2069	43.6011	2092
35.9013	727	43.6266	2191	43.6266	2074	35.9013	1715	43.6266	2000	43.6266	2141
35.9218	740	43.6522	2201	43.6522	2075	35.9218	1769	43.6522	1911	43.6522	2033
35.9422	765	43.6778	2142	43.6778	2112	35.9422	1762	43.6778	2062	43.6778	2104
35.9627	765	43.7034	2119	43.7034	2054	35.9627	1751	43.7034	2038	43.7034	2108
35.9832	712	43.729	2188	43.729	2074	35.9832	1710	43.729	2017	43.729	2174
36.0036	832	43.7545	2086	43.7545	2003	36.0036	1640	43.7545	1974	43.7545	1968
36.0241	724	43.7801	2245	43.7801	1969	36.0241	1681	43.7801	1989	43.7801	2113
36.0446	773	43.8057	2166	43.8057	2077	36.0446	1645	43.8057	2034	43.8057	2111
36.065	768	43.8313	2093	43.8313	2145	36.065	1704	43.8313	1938	43.8313	2053
36.0855	783	43.8569	2139	43.8569	2102	36.0855	1738	43.8569	2036	43.8569	2117
36.106	695	43.8824	2141	43.8824	2075	36.106	1636	43.8824	2007	43.8824	2083
36.1264	765	43.908	2190	43.908	2077	36.1264	1689	43.908	1984	43.908	2052
36.1469	762	43.9336	2106	43.9336	2126	36.1469	1626	43.9336	2016	43.9336	1991
36.1673	775	43.9592	2126	43.9592	2095	36.1673	1622	43.9592	1972	43.9592	2040
36.1878	755	43.9848	2189	43.9848	2104	36.1878	1705	43.9848	1995	43.9848	2052
36.2083	729	44.0103	2172	44.0103	2082	36.2083	1582	44.0103	2036	44.0103	2079
36.2287	746	44.0359	2073	44.0359	2102	36.2287	1621	44.0359	1939	44.0359	2028
36.2492	753	44.0615	2140	44.0615	2106	36.2492	1581	44.0615	1948	44.0615	2090
36.2697	774	44.0871	2056	44.0871	2044	36.2697	1622	44.0871	1986	44.0871	1994
36.2901	789	44.1127	2182	44.1127	2085	36.2901	1689	44.1127	1981	44.1127	2088
36.3106	760	44.1383	2166	44.1383	2047	36.3106	1659	44.1383	2011	44.1383	2040
36.3311	706	44.1638	2159	44.1638	2117	36.3311	1703	44.1638	2040	44.1638	2046
36.3515	786	44.1894	2121	44.1894	2019	36.3515	1633	44.1894	1958	44.1894	2059
36.372	693	44.215	2163	44.215	2104	36.372	1597	44.215	1964	44.215	2027
36.3925	715	44.2406	2183	44.2406	2122	36.3925	1596	44.2406	2031	44.2406	2017
36.4129	706	44.2662	2209	44.2662	2060	36.4129	1650	44.2662	2032	44.2662	2066
36.4334	791	44.2917	2215	44.2917	2094	36.4334	1683	44.2917	1958	44.2917	2003
36.4539	736	44.3173	2112	44.3173	2104	36.4539	1557	44.3173	1982	44.3173	2006
36.4743	758	44.3429	2098	44.3429	2067	36.4743	1609	44.3429	1926	44.3429	2007
36.4948	761	44.3685	2154	44.3685	2072	36.4948	1567	44.3685	1980	44.3685	2114
36.5152	751	44.3941	2072	44.3941	2071	36.5152	1625	44.3941	1912	44.3941	2068
36.5357	756	44.4196	2140	44.4196	2093	36.5357	1632	44.4196	1909	44.4196	2068
36.5562	758	44.4452	2132	44.4452	2081	36.5562	1670	44.4452	1900	44.4452	2078
36.5766	706	44.4708	2182	44.4708	2079	36.5766	1618	44.4708	1982	44.4708	2006
36.5971	729	44.4964	2217	44.4964	2070	36.5971	1671	44.4964	2007	44.4964	2037
36.6176	728	44.522	2116	44.522	2059	36.6176	1657	44.522	1950	44.522	1968
36.638	743	44.5475	2142	44.5475	2057	36.638	1615	44.5475	2047	44.5475	2059
36.6585	706	44.5731	2130	44.5731	2106	36.6585	1680	44.5731	1975	44.5731	1973
36.679	745	44.5987	2195	44.5987	2068	36.679	1552	44.5987	1997	44.5987	2083
36.6994	751	44.6243	2161	44.6243	2139	36.6994	1643	44.6243	1898	44.6243	2080
36.7199	739	44.6499	2202	44.6499	2074	36.7199	1653	44.6499	2031	44.6499	2021
36.7404	714	44.6754	2209	44.6754	2176	36.7404	1598	44.6754	2036	44.6754	2070
36.7608	782	44.701	2123	44.701	2042	36.7608	1567	44.701	2116	44.701	1907
36.7813	770	44.7266	2134	44.7266	2094	36.7813	1669	44.7266	2089	44.7266	2021
36.8017	760	44.7522	2119	44.7522	2003	36.8017	1650	44.7522	1988	44.7522	2065
36.8222	715	44.7778	2158	44.7778	2096	36.8222	1653	44.7778	2021	44.7778	2016
36.8427	742	44.8033	2251	44.8033	2148	36.8427	1627	44.8033	2018	44.8033	2012
36.8631	719	44.8289	2215	44.8289	2138	36.8631	1631	44.8289	2040	44.8289	1975
36.8836	757	44.8545	2197	44.8545	2033	36.8836	1661	44.8545	1959	44.8545	2051
36.9041	773	44.8801	2253	44.8801	2049	36.9041	1577	44.8801	2006	44.8801	2044
36.9245	769	44.9057	2222	44.9057	2101	36.9245	1633	44.9057	1988	44.9057	2088
36.945	785	44.9312	2148	44.9312	2165	36.945	1670	44.9312	1984	44.9312	1983
36.9655	736	44.9568	2186	44.9568	2087	36.9655	1582	44.9568	1932	44.9568	2046
36.9859	756	44.9824	2186	44.9824	2071	36.9859	1665	44.9824	2044	44.9824	2038
37.0064	755	45.008	2185	45.008	2113	37.0064	1606	45.008	2024	45.008	2008
37.0269	740	45.0336	2180	45.0336	2109	37.0269	1706	45.0336	2053	45.0336	2070
37.0473	824	45.0592	2204	45.0592	2161	37.0473	1642	45.0592	1961	45.0592	2039
37.0678	733	45.0847	2143	45.0847	2021	37.0678	1672	45.0847	1994	45.0847	2109
37.0882	742	45.1103	2218	45.1103	2051	37.0882	1719	45.1103	1968	45.1103	2139
37.1087	798	45.1359	2181	45.1359	2000	37.1087	1636	45.1359	1988	45.1359	2033
37.1292	715	45.1615	2180	45.1615	2017	37.1292	1711	45.1615	2002	45.1615	2125
37.1496	796	45.1871	2186	45.1871	2143	37.1496	1573	45.1871	1965	45.1871	1960
37.1701	811	45.2126	2154	45.2126	2159	37.1701	1590	45.2126	1982	45.2126	1936
37.1906	776	45.2382	2129	45.2382	2125	37.1906	1664	45.2382	2094	45.2382	2009
37.211	741	45.2638	2088	45.2638	2174	37.211	1506	45.2638	1970	45.2638	2028
37.2315	769	45.2894	2163	45.2894	2073	37.2315	1574	45.2894	1990	45.2894	1993
37.252	730	45.315	2162	45.315	2171	37.252	1615	45.315	2020	45.315	1945
37.2724	749	45.3405	2085	45.3405	2139	37.2724	1647	45.3405	1938	45.3405	1957
37.2929	754	45.3661	2179	45.3661	2106	37.2929	1572	45.3661	1985	45.3661	1990
37.3134	759	45.3917	2206	45.3917	2016	37.3134	1661	45.3917	1918	45.3917	2013
37.3338	821	45.4173	2117	45.4173	2015	37.3338	1657	45.4173	1999	45.4173	1980
37.3543	803	45.4429	2205	45.4429	2024	37.3543	1582	45.4429	2057	45.4429	2076
37.3748	723	45.4684	2162	45.4684	2071	37.3748	1579	45.4684	1996	45.4684	1946
37.3952	739	45.494	2224	45.494	2061	37.3952	1628	45.494	2037	45.494	1981
37.4157	785	45.5196	2128	45.5196	2067	37.4157	1564	45.5196	2061	45.5196	2050
37.4361	773	45.5452	2163	45.5452	2175	37.4361	1615	45.5452	1962	45.5452	2041
37.4566	767	45.5708	2127	45.5708	2066	37.4566	1652	45.5708	1941	45.5708	2029
37.4771	758	45.5963	2160	45.5963	2008	37.4771	1557	45.5963	1970	45.5963	1996
37.4975	773	45.6219	2148	45.6219	2066	37.4975	1605	45.6219	1930	45.6219	2000
37.518	804	45.6475	2103	45.6475	2049	37.518	1609	45.6475	1983	45.6475	2030
37.5385	722	45.6731	2216	45.6731	2030	37.5385	1589	45.6731	1979	45.6731	2028
37.5589	754	45.6987	2168	45.6987	2067	37.5589	1523	45.6987	1942	45.6987	1990
37.5794	782	45.7242	2140	45.7242	2188	37.5794	1566	45.7242	1995	45.7242	1977
37.5999	768	45.7498	2146	45.7498	2092	37.5999	1579	45.7498	1937	45.7498	1961
37.6203	747	45.7754	2125	45.7754	2029	37.6203	1606	45.7754	1893	45.7754	2069
37.6408	733	45.801	2054	45.801	2058	37.6408	1586	45.801	2008	45.801	2034
37.6613	711	45.8266	2120	45.8266	2053	37.6613	1607	45.8266	1953	45.8266	2029
37.6817	784	45.8521	2186	45.8521	2042	37.6817	1583	45.8521	1986	45.8521	2007
37.7022	761	45.8777	2219	45.8777	2111	37.7022	1563	45.8777	1919	45.8777	2041
37.7226	712	45.9033	2120	45.9033	2045	37.7226	1593	45.9033	2008	45.9033	2082
37.7431	732	45.9289	2014	45.9289	2003	37.7431	1613	45.9289	1997	45.9289	2002
37.7636	754	45.9545	2096	45.9545	2138	37.7636	1618	45.9545	1994	45.9545	1956
37.784	779	45.9801	2095	45.9801	2078	37.784	1662	45.9801	2050	45.9801	1992
37.8045	708	46.0056	2143	46.0056	2039	37.8045	1505	46.0056	1982	46.0056	1970
37.825	786	46.0312	2122	46.0312	2077	37.825	1698	46.0312	2006	46.0312	2007
37.8454	795	46.0568	2186	46.0568	2097	37.8454	1589	46.0568	1942	46.0568	2013
37.8659	773	46.0824	2216	46.0824	2041	37.8659	1564	46.0824	1980	46.0824	2072
37.8864	763	46.108	2129	46.108	2014	37.8864	1664	46.108	1913	46.108	2028
37.9068	801	46.1335	2126	46.1335	2051	37.9068	1593	46.1335	1978	46.1335	1990
37.9273	748	46.1591	2210	46.1591	2021	37.9273	1576	46.1591	2010	46.1591	2012
37.9478	720	46.1847	2149	46.1847	2147	37.9478	1587	46.1847	1992	46.1847	2029
37.9682	777	46.2103	2135	46.2103	2027	37.9682	1587	46.2103	2006	46.2103	2034
37.9887	736	46.2359	2194	46.2359	2033	37.9887	1657	46.2359	1940	46.2359	2098
38.0091	682	46.2614	2139	46.2614	2153	38.0091	1591	46.2614	2031	46.2614	1964
38.0296	808	46.287	2076	46.287	2055	38.0296	1569	46.287	2064	46.287	2037
38.0501	758	46.3126	2076	46.3126	2038	38.0501	1583	46.3126	2046	46.3126	1982
38.0705	744	46.3382	2076	46.3382	2065	38.0705	1587	46.3382	2005	46.3382	2041
38.091	754	46.3638	2161	46.3638	2093	38.091	1617	46.3638	2020	46.3638	2043
38.1115	706	46.3893	2132	46.3893	2035	38.1115	1639	46.3893	1981	46.3893	1958
38.1319	709	46.4149	2163	46.4149	2061	38.1319	1578	46.4149	2014	46.4149	1936
38.1524	756	46.4405	2227	46.4405	2094	38.1524	1517	46.4405	2089	46.4405	1973
38.1729	732	46.4661	2190	46.4661	2143	38.1729	1628	46.4661	2111	46.4661	2066
38.1933	783	46.4917	2194	46.4917	2047	38.1933	1618	46.4917	1971	46.4917	2012
38.2138	745	46.5172	2185	46.5172	2152	38.2138	1556	46.5172	2001	46.5172	2068
38.2343	767	46.5428	2242	46.5428	2161	38.2343	1596	46.5428	2037	46.5428	2014
38.2547	724	46.5684	2233	46.5684	2110	38.2547	1621	46.5684	1961	46.5684	2093
38.2752	740	46.594	2181	46.594	2121	38.2752	1551	46.594	1903	46.594	2019
38.2957	791	46.6196	2124	46.6196	2080	38.2957	1574	46.6196	1940	46.6196	2108
38.3161	800	46.6451	2158	46.6451	2041	38.3161	1567	46.6451	1997	46.6451	1998
38.3366	768	46.6707	2171	46.6707	2092	38.3366	1632	46.6707	2056	46.6707	2051
38.357	777	46.6963	2120	46.6963	1986	38.357	1533	46.6963	1942	46.6963	2037
38.3775	722	46.7219	2186	46.7219	2070	38.3775	1621	46.7219	1980	46.7219	2038
38.398	785	46.7475	2145	46.7475	1998	38.398	1617	46.7475	2097	46.7475	2001
38.4184	759	46.773	2186	46.773	2081	38.4184	1590	46.773	1982	46.773	2054
38.4389	739	46.7986	2198	46.7986	2174	38.4389	1602	46.7986	1982	46.7986	2096
38.4594	790	46.8242	2169	46.8242	2025	38.4594	1614	46.8242	2055	46.8242	2029
38.4798	755	46.8498	2157	46.8498	2045	38.4798	1561	46.8498	1961	46.8498	2075
38.5003	744	46.8754	2077	46.8754	2110	38.5003	1537	46.8754	2046	46.8754	2067
38.5208	726	46.901	2206	46.901	2063	38.5208	1649	46.901	2034	46.901	1975
38.5412	792	46.9265	2159	46.9265	2070	38.5412	1636	46.9265	2033	46.9265	1989
38.5617	741	46.9521	2109	46.9521	2132	38.5617	1526	46.9521	1920	46.9521	2073
38.5822	746	46.9777	2129	46.9777	2082	38.5822	1597	46.9777	1983	46.9777	2069
38.6026	826	47.0033	2024	47.0033	2086	38.6026	1578	47.0033	2033	47.0033	2107
38.6231	777	47.0289	2068	47.0289	2005	38.6231	1668	47.0289	2000	47.0289	1980
38.6435	798	47.0544	2217	47.0544	2044	38.6435	1597	47.0544	1968	47.0544	1997
38.664	752	47.08	2192	47.08	2078	38.664	1614	47.08	1955	47.08	1986
38.6845	730	47.1056	2100	47.1056	2118	38.6845	1572	47.1056	2044	47.1056	1963
38.7049	771	47.1312	2117	47.1312	2123	38.7049	1535	47.1312	1997	47.1312	1956
38.7254	758	47.1568	2176	47.1568	2140	38.7254	1550	47.1568	1968	47.1568	2056
38.7459	713	47.1823	2190	47.1823	2092	38.7459	1549	47.1823	1985	47.1823	2074
38.7663	737	47.2079	2216	47.2079	2078	38.7663	1608	47.2079	1941	47.2079	1993
38.7868	753	47.2335	2206	47.2335	2040	38.7868	1669	47.2335	1993	47.2335	2033
38.8073	752	47.2591	2077	47.2591	2084	38.8073	1592	47.2591	2057	47.2591	2042
38.8277	763	47.2847	2150	47.2847	2054	38.8277	1609	47.2847	1895	47.2847	1968
38.8482	773	47.3102	2226	47.3102	2135	38.8482	1546	47.3102	1967	47.3102	2037
38.8687	753	47.3358	2173	47.3358	2046	38.8687	1588	47.3358	2038	47.3358	1968
38.8891	728	47.3614	2107	47.3614	2039	38.8891	1620	47.3614	1990	47.3614	2048
38.9096	723	47.387	2124	47.387	2046	38.9096	1581	47.387	2002	47.387	2058
38.93	787	47.4126	2158	47.4126	2151	38.93	1620	47.4126	1946	47.4126	1990
38.9505	751	47.4381	2201	47.4381	2076	38.9505	1590	47.4381	1922	47.4381	2040
38.971	722	47.4637	2259	47.4637	2101	38.971	1546	47.4637	1983	47.4637	2123
38.9914	793	47.4893	2157	47.4893	2058	38.9914	1628	47.4893	1946	47.4893	2037
39.0119	732	47.5149	2126	47.5149	2000	39.0119	1626	47.5149	2027	47.5149	1981
39.0324	725	47.5405	2141	47.5405	2095	39.0324	1614	47.5405	1982	47.5405	2076
39.0528	732	47.566	2038	47.566	1998	39.0528	1616	47.566	2015	47.566	1998
39.0733	720	47.5916	2205	47.5916	2080	39.0733	1565	47.5916	1976	47.5916	2050
39.0938	747	47.6172	2108	47.6172	2119	39.0938	1608	47.6172	1918	47.6172	2053
39.1142	792	47.6428	2200	47.6428	2121	39.1142	1567	47.6428	1952	47.6428	1957
39.1347	757	47.6684	2213	47.6684	2108	39.1347	1656	47.6684	2018	47.6684	2069
39.1552	783	47.6939	2063	47.6939	2061	39.1552	1562	47.6939	1992	47.6939	2008
39.1756	811	47.7195	2135	47.7195	2184	39.1756	1682	47.7195	1971	47.7195	2025
39.1961	768	47.7451	2130	47.7451	2021	39.1961	1579	47.7451	1926	47.7451	2041
39.2166	737	47.7707	2122	47.7707	2097	39.2166	1630	47.7707	1964	47.7707	2016
39.237	775	47.7963	2169	47.7963	2109	39.237	1560	47.7963	1897	47.7963	1992
39.2575	773	47.8219	2112	47.8219	1960	39.2575	1660	47.8219	1995	47.8219	2110
39.2779	821	47.8474	2251	47.8474	2037	39.2779	1639	47.8474	1984	47.8474	2046
39.2984	758	47.873	2146	47.873	2068	39.2984	1616	47.873	1991	47.873	2075
39.3189	750	47.8986	2191	47.8986	2138	39.3189	1595	47.8986	1976	47.8986	2057
39.3393	799	47.9242	2184	47.9242	2119	39.3393	1570	47.9242	1977	47.9242	2049
39.3598	766	47.9498	2081	47.9498	2087	39.3598	1637	47.9498	1938	47.9498	2099
39.3803	753	47.9753	2187	47.9753	2092	39.3803	1668	47.9753	2010	47.9753	1974
39.4007	732	48.0009	2179	48.0009	2046	39.4007	1507	48.0009	1897	48.0009	2022
39.4212	780	48.0265	2156	48.0265	2052	39.4212	1569	48.0265	1989	48.0265	2000
39.4417	787	48.0521	2144	48.0521	2079	39.4417	1640	48.0521	2008	48.0521	2025
39.4621	774	48.0777	2157	48.0777	2083	39.4621	1608	48.0777	1971	48.0777	2012
39.4826	762	48.1032	2254	48.1032	2029	39.4826	1646	48.1032	1973	48.1032	2023
39.5031	694	48.1288	2169	48.1288	2124	39.5031	1636	48.1288	1949	48.1288	2000
39.5235	770	48.1544	2185	48.1544	2097	39.5235	1610	48.1544	1955	48.1544	2071
39.544	726	48.18	2239	48.18	2109	39.544	1574	48.18	2025	48.18	2004
39.5644	815	48.2056	2150	48.2056	2003	39.5644	1655	48.2056	2015	48.2056	2019
39.5849	761	48.2311	2137	48.2311	2058	39.5849	1632	48.2311	1996	48.2311	1967
39.6054	725	48.2567	2110	48.2567	2040	39.6054	1574	48.2567	1975	48.2567	2041
39.6258	751	48.2823	2114	48.2823	2113	39.6258	1586	48.2823	1990	48.2823	1979
39.6463	776	48.3079	2111	48.3079	2157	39.6463	1560	48.3079	1969	48.3079	2020
39.6668	794	48.3335	2228	48.3335	2074	39.6668	1634	48.3335	1997	48.3335	1990
39.6872	745	48.359	2131	48.359	2159	39.6872	1590	48.359	1909	48.359	2012
39.7077	771	48.3846	2096	48.3846	2094	39.7077	1637	48.3846	2005	48.3846	2058
39.7282	710	48.4102	2175	48.4102	2098	39.7282	1626	48.4102	1952	48.4102	2079
39.7486	767	48.4358	2186	48.4358	2109	39.7486	1550	48.4358	1998	48.4358	2028
39.7691	710	48.4614	2074	48.4614	2061	39.7691	1670	48.4614	1944	48.4614	2115
39.7896	745	48.4869	2170	48.4869	2093	39.7896	1588	48.4869	1960	48.4869	1995
39.81	814	48.5125	2196	48.5125	2093	39.81	1564	48.5125	2040	48.5125	2044
39.8305	753	48.5381	2210	48.5381	2066	39.8305	1545	48.5381	1960	48.5381	2035
39.8509	777	48.5637	2184	48.5637	2066	39.8509	1542	48.5637	1938	48.5637	2056
39.8714	771	48.5893	2194	48.5893	2111	39.8714	1599	48.5893	1952	48.5893	2012
39.8919	768	48.6148	2216	48.6148	2020	39.8919	1578	48.6148	2025	48.6148	2125
39.9123	757	48.6404	2173	48.6404	2055	39.9123	1620	48.6404	2060	48.6404	1986
39.9328	764	48.666	2160	48.666	2062	39.9328	1627	48.666	2008	48.666	2067
39.9533	781	48.6916	2214	48.6916	2054	39.9533	1665	48.6916	1945	48.6916	2027
39.9737	776	48.7172	2142	48.7172	2050	39.9737	1594	48.7172	2071	48.7172	1990
39.9942	745	48.7428	2232	48.7428	2057	39.9942	1574	48.7428	1979	48.7428	2079
40.0147	746	48.7683	2172	48.7683	2077	40.0147	1638	48.7683	1961	48.7683	2072
40.0351	747	48.7939	2181	48.7939	2096	40.0351	1658	48.7939	1991	48.7939	2058
40.0556	789	48.8195	2172	48.8195	2085	40.0556	1571	48.8195	1987	48.8195	2033
40.0761	747	48.8451	2140	48.8451	2130	40.0761	1672	48.8451	1999	48.8451	2075
40.0965	762	48.8707	2254	48.8707	2090	40.0965	1625	48.8707	1969	48.8707	2020
40.117	783	48.8962	2126	48.8962	2101	40.117	1606	48.8962	1914	48.8962	1963
40.1375	699	48.9218	2117	48.9218	2023	40.1375	1615	48.9218	2021	48.9218	1937
40.1579	756	48.9474	2248	48.9474	2043	40.1579	1590	48.9474	2055	48.9474	2038
40.1784	772	48.973	2136	48.973	2075	40.1784	1642	48.973	1975	48.973	2039
40.1988	749	48.9986	2138	48.9986	2077	40.1988	1642	48.9986	1995	48.9986	2008
40.2193	708	49.0241	2019	49.0241	2158	40.2193	1584	49.0241	1979	49.0241	2035
40.2398	720	49.0497	2155	49.0497	2087	40.2398	1559	49.0497	1953	49.0497	2074
40.2602	800	49.0753	2154	49.0753	2099	40.2602	1630	49.0753	2021	49.0753	1994
40.2807	761	49.1009	2169	49.1009	2046	40.2807	1692	49.1009	1987	49.1009	2070
40.3012	799	49.1265	2222	49.1265	2135	40.3012	1544	49.1265	1973	49.1265	2081
40.3216	729	49.152	2217	49.152	2046	40.3216	1604	49.152	1962	49.152	2029
40.3421	724	49.1776	2102	49.1776	2065	40.3421	1598	49.1776	2025	49.1776	2051
40.3626	804	49.2032	2086	49.2032	2082	40.3626	1586	49.2032	2030	49.2032	2059
40.383	744	49.2288	2159	49.2288	2110	40.383	1555	49.2288	1937	49.2288	1990
40.4035	798	49.2544	2172	49.2544	2111	40.4035	1662	49.2544	1976	49.2544	2024
40.424	777	49.2799	2171	49.2799	2071	40.424	1557	49.2799	1962	49.2799	1969
40.4444	753	49.3055	2159	49.3055	2119	40.4444	1592	49.3055	2006	49.3055	2061
40.4649	755	49.3311	2166	49.3311	2094	40.4649	1637	49.3311	2109	49.3311	2009
40.4853	787	49.3567	2137	49.3567	2084	40.4853	1639	49.3567	2006	49.3567	2117
40.5058	748	49.3823	2154	49.3823	2049	40.5058	1718	49.3823	1996	49.3823	2094
40.5263	750	49.4078	2091	49.4078	2065	40.5263	1632	49.4078	2059	49.4078	1954
40.5467	767	49.4334	2126	49.4334	2054	40.5467	1683	49.4334	2038	49.4334	2094
40.5672	771	49.459	2209	49.459	2039	40.5672	1635	49.459	1984	49.459	2040
40.5877	743	49.4846	2211	49.4846	2074	40.5877	1589	49.4846	2003	49.4846	2090
40.6081	802	49.5102	2126	49.5102	1990	40.6081	1684	49.5102	1985	49.5102	2052
40.6286	851	49.5357	2185	49.5357	2091	40.6286	1569	49.5357	2061	49.5357	2016
40.6491	794	49.5613	2226	49.5613	2123	40.6491	1602	49.5613	2046	49.5613	2004
40.6695	764	49.5869	2151	49.5869	2060	40.6695	1632	49.5869	1970	49.5869	2117
40.69	793	49.6125	2122	49.6125	2106	40.69	1619	49.6125	1934	49.6125	2092
40.7105	737	49.6381	2002	49.6381	2135	40.7105	1558	49.6381	1956	49.6381	2075
40.7309	778	49.6637	2124	49.6637	2114	40.7309	1605	49.6637	2015	49.6637	2002
40.7514	745	49.6892	2162	49.6892	2013	40.7514	1662	49.6892	2032	49.6892	1921
40.7718	741	49.7148	2193	49.7148	2093	40.7718	1562	49.7148	2038	49.7148	1987
40.7923	798	49.7404	2114	49.7404	2063	40.7923	1577	49.7404	1982	49.7404	2091
40.8128	767	49.766	2195	49.766	2033	40.8128	1711	49.766	1933	49.766	2052
40.8332	813	49.7916	2127	49.7916	2013	40.8332	1703	49.7916	2003	49.7916	2058
40.8537	761	49.8171	2183	49.8171	2084	40.8537	1659	49.8171	1988	49.8171	2080
40.8742	748	49.8427	2148	49.8427	2043	40.8742	1675	49.8427	1996	49.8427	2046
40.8946	774	49.8683	2141	49.8683	2014	40.8946	1589	49.8683	2112	49.8683	2107
40.9151	775	49.8939	2161	49.8939	2019	40.9151	1632	49.8939	2115	49.8939	1990
40.9356	788	49.9195	2098	49.9195	2115	40.9356	1628	49.9195	1957	49.9195	2038
40.956	772	49.945	2144	49.945	2064	40.956	1737	49.945	1883	49.945	2072
40.9765	776	49.9706	2161	49.9706	2178	40.9765	1560	49.9706	2032	49.9706	1984
40.997	768	49.9962	2174	49.9962	1979	40.997	1682	49.9962	2023	49.9962	2014
41.0174	780	50.0218	2057	50.0218	2027	41.0174	1638	50.0218	1997	50.0218	2092
41.0379	770	50.0474	2124	50.0474	2102	41.0379	1650	50.0474	1925	50.0474	2056
41.0584	782	50.0729	2139	50.0729	2144	41.0584	1585	50.0729	1957	50.0729	2098
41.0788	783	50.0985	2199	50.0985	2032	41.0788	1623	50.0985	2041	50.0985	2031
41.0993	808	50.1241	2175	50.1241	2121	41.0993	1639	50.1241	2007	50.1241	2066
41.1197	785	50.1497	2140	50.1497	2049	41.1197	1563	50.1497	2032	50.1497	2092
41.1402	799	50.1753	2163	50.1753	2077	41.1402	1615	50.1753	2038	50.1753	2058
41.1607	806	50.2008	2178	50.2008	2141	41.1607	1653	50.2008	1969	50.2008	2030
41.1811	786	50.2264	2078	50.2264	2137	41.1811	1565	50.2264	2087	50.2264	1986
41.2016	799	50.252	2151	50.252	2112	41.2016	1666	50.252	2016	50.252	2097
41.2221	792	50.2776	2175	50.2776	2049	41.2221	1551	50.2776	2005	50.2776	2150
41.2425	811	50.3032	2234	50.3032	2112	41.2425	1627	50.3032	1938	50.3032	2028
41.263	789	50.3287	2159	50.3287	2017	41.263	1617	50.3287	1963	50.3287	2050
41.2835	815	50.3543	2208	50.3543	2105	41.2835	1610	50.3543	2016	50.3543	2050
41.3039	767	50.3799	2123	50.3799	2074	41.3039	1641	50.3799	1941	50.3799	2050
41.3244	787	50.4055	2098	50.4055	2054	41.3244	1643	50.4055	1990	50.4055	2024
41.3449	776	50.4311	2172	50.4311	2128	41.3449	1625	50.4311	1977	50.4311	1980
41.3653	796	50.4566	2195	50.4566	2043	41.3653	1605	50.4566	2004	50.4566	2020
41.3858	772	50.4822	2182	50.4822	2067	41.3858	1672	50.4822	1914	50.4822	2086
41.4062	831	50.5078	2117	50.5078	2034	41.4062	1636	50.5078	1908	50.5078	1930
41.4267	758	50.5334	2155	50.5334	2048	41.4267	1696	50.5334	1958	50.5334	2020
41.4472	756	50.559	2149	50.559	2076	41.4472	1571	50.559	1949	50.559	2032
41.4676	793	50.5846	2105	50.5846	2080	41.4676	1685	50.5846	2075	50.5846	2042
41.4881	758	50.6101	2152	50.6101	2160	41.4881	1578	50.6101	2032	50.6101	1959
41.5086	765	50.6357	2076	50.6357	1996	41.5086	1594	50.6357	2007	50.6357	2071
41.529	777	50.6613	2196	50.6613	2069	41.529	1605	50.6613	2041	50.6613	2007
41.5495	769	50.6869	2175	50.6869	2092	41.5495	1663	50.6869	1977	50.6869	2072
41.57	772	50.7125	2187	50.7125	2056	41.57	1623	50.7125	1904	50.7125	1982
41.5904	818	50.738	2158	50.738	2069	41.5904	1702	50.738	2010	50.738	2026
41.6109	808	50.7636	2208	50.7636	2054	41.6109	1612	50.7636	2008	50.7636	2124
41.6314	791	50.7892	2189	50.7892	2044	41.6314	1618	50.7892	2024	50.7892	2073
41.6518	819	50.8148	2123	50.8148	1968	41.6518	1654	50.8148	2039	50.8148	2049
41.6723	807	50.8404	2103	50.8404	2060	41.6723	1628	50.8404	1987	50.8404	2059
41.6927	815	50.8659	2169	50.8659	2085	41.6927	1622	50.8659	2035	50.8659	2058
41.7132	742	50.8915	2139	50.8915	2089	41.7132	1729	50.8915	1931	50.8915	2067
41.7337	817	50.9171	2140	50.9171	2047	41.7337	1594	50.9171	2050	50.9171	2000
41.7541	782	50.9427	2122	50.9427	2090	41.7541	1698	50.9427	1963	50.9427	2117
41.7746	764	50.9683	2149	50.9683	2080	41.7746	1646	50.9683	2006	50.9683	2021
41.7951	811	50.9938	2118	50.9938	2050	41.7951	1607	50.9938	1964	50.9938	2025
41.8155	799	51.0194	2265	51.0194	2094	41.8155	1628	51.0194	1937	51.0194	2079
41.836	771	51.045	2120	51.045	2091	41.836	1708	51.045	1969	51.045	2074
41.8565	754	51.0706	2093	51.0706	2100	41.8565	1696	51.0706	2002	51.0706	1989
41.8769	812	51.0962	2203	51.0962	2119	41.8769	1606	51.0962	1973	51.0962	2051
41.8974	755	51.1217	2146	51.1217	2193	41.8974	1615	51.1217	1950	51.1217	2109
41.9179	777	51.1473	2122	51.1473	2140	41.9179	1625	51.1473	1968	51.1473	2041
41.9383	814	51.1729	2087	51.1729	2021	41.9383	1669	51.1729	2011	51.1729	2018
41.9588	799	51.1985	2110	51.1985	2121	41.9588	1660	51.1985	2012	51.1985	2080
41.9793	805	51.2241	2172	51.2241	2047	41.9793	1604	51.2241	2020	51.2241	2035
41.9997	781	51.2496	2131	51.2496	2120	41.9997	1720	51.2496	2050	51.2496	1992
42.0202	800	51.2752	2192	51.2752	2139	42.0202	1663	51.2752	2059	51.2752	2050
42.0406	823	51.3008	2196	51.3008	2056	42.0406	1661	51.3008	2047	51.3008	1995
42.0611	780	51.3264	2154	51.3264	2012	42.0611	1662	51.3264	1992	51.3264	2125
42.0816	795	51.352	2186	51.352	2122	42.0816	1673	51.352	2105	51.352	2029
42.102	845	51.3775	2124	51.3775	2116	42.102	1691	51.3775	1930	51.3775	2071
42.1225	745	51.4031	2150	51.4031	2112	42.1225	1632	51.4031	2090	51.4031	1988
42.143	764	51.4287	2156	51.4287	2069	42.143	1669	51.4287	2037	51.4287	2130
42.1634	801	51.4543	2165	51.4543	2074	42.1634	1683	51.4543	1969	51.4543	2050
42.1839	824	51.4799	2105	51.4799	2013	42.1839	1586	51.4799	2022	51.4799	2102
42.2044	759	51.5055	2129	51.5055	2059	42.2044	1665	51.5055	1914	51.5055	2027
42.2248	848	51.531	2181	51.531	2044	42.2248	1668	51.531	2032	51.531	2037
42.2453	811	51.5566	2144	51.5566	2094	42.2453	1638	51.5566	2018	51.5566	2067
42.2658	790	51.5822	2125	51.5822	2054	42.2658	1772	51.5822	1968	51.5822	2033
42.2862	785	51.6078	2102	51.6078	2053	42.2862	1659	51.6078	1974	51.6078	2032
42.3067	800	51.6334	2207	51.6334	2157	42.3067	1712	51.6334	1982	51.6334	2071
42.3271	750	51.6589	2171	51.6589	2143	42.3271	1680	51.6589	1974	51.6589	2028
42.3476	825	51.6845	2112	51.6845	2063	42.3476	1689	51.6845	1973	51.6845	2064
42.3681	836	51.7101	2159	51.7101	2027	42.3681	1630	51.7101	2014	51.7101	1974
42.3885	802	51.7357	2123	51.7357	2105	42.3885	1644	51.7357	1964	51.7357	2068
42.409	762	51.7613	2194	51.7613	2085	42.409	1652	51.7613	2039	51.7613	2063
42.4295	827	51.7868	2223	51.7868	2126	42.4295	1714	51.7868	2059	51.7868	1989
42.4499	784	51.8124	2206	51.8124	2157	42.4499	1624	51.8124	2009	51.8124	2071
42.4704	816	51.838	2136	51.838	2010	42.4704	1677	51.838	2056	51.838	2080
42.4909	797	51.8636	2167	51.8636	2082	42.4909	1712	51.8636	1995	51.8636	1975
42.5113	785	51.8892	2107	51.8892	1963	42.5113	1670	51.8892	2061	51.8892	2060
42.5318	810	51.9147	2134	51.9147	2015	42.5318	1687	51.9147	2025	51.9147	2026
42.5523	775	51.9403	2116	51.9403	2019	42.5523	1664	51.9403	1982	51.9403	2038
42.5727	777	51.9659	2088	51.9659	2128	42.5727	1737	51.9659	2049	51.9659	2093
42.5932	845	51.9915	2146	51.9915	2138	42.5932	1690	51.9915	2006	51.9915	2036
42.6136	780	52.0171	2160	52.0171	2085	42.6136	1718	52.0171	1989	52.0171	2064
42.6341	805	52.0426	2170	52.0426	2003	42.6341	1729	52.0426	2054	52.0426	2088
42.6546	791	52.0682	2135	52.0682	2082	42.6546	1729	52.0682	2040	52.0682	2155
42.675	821	52.0938	2178	52.0938	2134	42.675	1755	52.0938	1976	52.0938	2059
42.6955	818	52.1194	2112	52.1194	2028	42.6955	1754	52.1194	1924	52.1194	2029
42.716	802	52.145	2128	52.145	2125	42.716	1731	52.145	2078	52.145	2060
42.7364	816	52.1705	2161	52.1705	2091	42.7364	1782	52.1705	1972	52.1705	2013
42.7569	848	52.1961	2151	52.1961	2075	42.7569	1789	52.1961	1914	52.1961	2100
42.7774	792	52.2217	2164	52.2217	2079	42.7774	1721	52.2217	1964	52.2217	2078
42.7978	772	52.2473	2222	52.2473	2022	42.7978	1793	52.2473	1992	52.2473	2138
42.8183	864	52.2729	2183	52.2729	2083	42.8183	1775	52.2729	2006	52.2729	1954
42.8388	805	52.2984	2282	52.2984	2047	42.8388	1784	52.2984	1936	52.2984	2097
42.8592	817	52.324	2107	52.324	2029	42.8592	1758	52.324	2068	52.324	2071
42.8797	818	52.3496	2146	52.3496	2042	42.8797	1818	52.3496	1935	52.3496	2089
42.9002	829	52.3752	2152	52.3752	2133	42.9002	1849	52.3752	1932	52.3752	2080
42.9206	863	52.4008	2151	52.4008	2041	42.9206	1802	52.4008	2029	52.4008	2041
42.9411	889	52.4264	2134	52.4264	2042	42.9411	1781	52.4264	1990	52.4264	2080
42.9615	881	52.4519	2126	52.4519	2018	42.9615	1833	52.4519	1944	52.4519	2013
42.982	859	52.4775	2143	52.4775	2136	42.982	1851	52.4775	2007	52.4775	2040
43.0025	887	52.5031	2169	52.5031	2023	43.0025	1796	52.5031	1982	52.5031	2048
43.0229	914	52.5287	2136	52.5287	2050	43.0229	1826	52.5287	1984	52.5287	2055
43.0434	975	52.5543	2043	52.5543	2142	43.0434	1807	52.5543	2049	52.5543	2016
43.0639	945	52.5798	2129	52.5798	2021	43.0639	1779	52.5798	1936	52.5798	2070
43.0843	960	52.6054	2257	52.6054	2078	43.0843	1730	52.6054	2035	52.6054	2080
43.1048	911	52.631	2143	52.631	2091	43.1048	1735	52.631	2025	52.631	2086
43.1253	957	52.6566	2228	52.6566	2132	43.1253	1863	52.6566	1991	52.6566	1954
43.1457	972	52.6822	2253	52.6822	2061	43.1457	1812	52.6822	1997	52.6822	2035
43.1662	893	52.7077	2164	52.7077	2152	43.1662	1821	52.7077	2059	52.7077	2088
43.1867	973	52.7333	2169	52.7333	2054	43.1867	1811	52.7333	2036	52.7333	2031
43.2071	943	52.7589	2117	52.7589	2128	43.2071	1754	52.7589	2069	52.7589	2037
43.2276	932	52.7845	2162	52.7845	2082	43.2276	1785	52.7845	2050	52.7845	2086
43.248	965	52.8101	2207	52.8101	2026	43.248	1794	52.8101	1973	52.8101	2026
43.2685	889	52.8356	2194	52.8356	2134	43.2685	1796	52.8356	2117	52.8356	2100
43.289	891	52.8612	2261	52.8612	2122	43.289	1783	52.8612	1976	52.8612	2020
43.3094	864	52.8868	2134	52.8868	2144	43.3094	1787	52.8868	2022	52.8868	2131
43.3299	850	52.9124	2168	52.9124	2018	43.3299	1785	52.9124	2077	52.9124	2033
43.3504	864	52.938	2136	52.938	2145	43.3504	1742	52.938	1986	52.938	2031
43.3708	829	52.9635	2104	52.9635	2077	43.3708	1814	52.9635	2069	52.9635	2059
43.3913	857	52.9891	2195	52.9891	2126	43.3913	1711	52.9891	1951	52.9891	2144
43.4118	851	53.0147	2062	53.0147	2118	43.4118	1696	53.0147	2039	53.0147	2041
43.4322	841	53.0403	2136	53.0403	2079	43.4322	1742	53.0403	1997	53.0403	2108
43.4527	790	53.0659	2224	53.0659	2103	43.4527	1730	53.0659	2133	53.0659	2038
43.4732	773	53.0914	2275	53.0914	1994	43.4732	1651	53.0914	2068	53.0914	2020
43.4936	812	53.117	2152	53.117	2019	43.4936	1628	53.117	2127	53.117	2073
43.5141	832	53.1426	2160	53.1426	2066	43.5141	1747	53.1426	2060	53.1426	2042
43.5345	814	53.1682	2081	53.1682	2081	43.5345	1702	53.1682	2081	53.1682	2115
43.555	807	53.1938	2217	53.1938	2092	43.555	1683	53.1938	2070	53.1938	2184
43.5755	793	53.2193	2166	53.2193	2111	43.5755	1704	53.2193	2034	53.2193	2063
43.5959	827	53.2449	2290	53.2449	2177	43.5959	1756	53.2449	2008	53.2449	2051
43.6164	780	53.2705	2124	53.2705	2147	43.6164	1707	53.2705	2057	53.2705	2085
43.6369	800	53.2961	2225	53.2961	2119	43.6369	1760	53.2961	2046	53.2961	2189
43.6573	749	53.3217	2199	53.3217	2176	43.6573	1661	53.3217	2030	53.3217	2103
43.6778	795	53.3473	2267	53.3473	2329	43.6778	1621	53.3473	2049	53.3473	2131
43.6983	789	53.3728	2361	53.3728	2196	43.6983	1676	53.3728	2085	53.3728	2124
43.7187	848	53.3984	2266	53.3984	2326	43.7187	1705	53.3984	2069	53.3984	2105
43.7392	777	53.424	2367	53.424	2368	43.7392	1741	53.424	2105	53.424	2138
43.7597	810	53.4496	2432	53.4496	2294	43.7597	1659	53.4496	2122	53.4496	2112
43.7801	801	53.4752	2465	53.4752	2263	43.7801	1673	53.4752	2042	53.4752	2135
43.8006	821	53.5007	2414	53.5007	2297	43.8006	1689	53.5007	2128	53.5007	2113
43.8211	813	53.5263	2408	53.5263	2288	43.8211	1621	53.5263	2028	53.5263	2094
43.8415	806	53.5519	2362	53.5519	2245	43.8415	1618	53.5519	2123	53.5519	2124
43.862	833	53.5775	2344	53.5775	2217	43.862	1700	53.5775	2075	53.5775	2181
43.8824	768	53.6031	2242	53.6031	2267	43.8824	1682	53.6031	2129	53.6031	2182
43.9029	887	53.6286	2278	53.6286	2145	43.9029	1674	53.6286	2068	53.6286	2079
43.9234	854	53.6542	2304	53.6542	2127	43.9234	1762	53.6542	2032	53.6542	2151
43.9438	838	53.6798	2314	53.6798	2115	43.9438	1636	53.6798	2105	53.6798	2192
43.9643	797	53.7054	2136	53.7054	2155	43.9643	1662	53.7054	2081	53.7054	2078
43.9848	722	53.731	2146	53.731	2141	43.9848	1679	53.731	2038	53.731	2085
44.0052	790	53.7565	2187	53.7565	2059	44.0052	1676	53.7565	2093	53.7565	2073
44.0257	872	53.7821	2189	53.7821	2055	44.0257	1642	53.7821	2124	53.7821	2135
44.0462	827	53.8077	2182	53.8077	2141	44.0462	1676	53.8077	2081	53.8077	2122
44.0666	830	53.8333	2138	53.8333	2022	44.0666	1671	53.8333	2079	53.8333	2108
44.0871	802	53.8589	2165	53.8589	2108	44.0871	1686	53.8589	2111	53.8589	2055
44.1076	811	53.8844	2185	53.8844	2077	44.1076	1607	53.8844	1949	53.8844	2146
44.128	748	53.91	2144	53.91	2054	44.128	1668	53.91	2021	53.91	2105
44.1485	792	53.9356	2086	53.9356	2113	44.1485	1642	53.9356	2132	53.9356	2112
44.1689	847	53.9612	2186	53.9612	2089	44.1689	1697	53.9612	2058	53.9612	2017
44.1894	792	53.9868	2101	53.9868	2146	44.1894	1657	53.9868	2118	53.9868	2085
44.2099	787	54.0123	2055	54.0123	2094	44.2099	1726	54.0123	2117	54.0123	2161
44.2303	831	54.0379	2211	54.0379	2068	44.2303	1576	54.0379	1980	54.0379	2175
44.2508	863	54.0635	2204	54.0635	2071	44.2508	1580	54.0635	2081	54.0635	2103
44.2713	798	54.0891	2153	54.0891	2079	44.2713	1680	54.0891	1994	54.0891	2013
44.2917	766	54.1147	2158	54.1147	2127	44.2917	1723	54.1147	2008	54.1147	2066
44.3122	821	54.1402	2211	54.1402	2044	44.3122	1622	54.1402	1962	54.1402	2086
44.3327	785	54.1658	2107	54.1658	2215	44.3327	1625	54.1658	2039	54.1658	2133
44.3531	796	54.1914	2250	54.1914	2090	44.3531	1702	54.1914	2023	54.1914	2080
44.3736	821	54.217	2204	54.217	2120	44.3736	1706	54.217	2054	54.217	2077
44.3941	805	54.2426	2188	54.2426	2096	44.3941	1644	54.2426	1996	54.2426	1986
44.4145	788	54.2682	2204	54.2682	2136	44.4145	1638	54.2682	2061	54.2682	2070
44.435	822	54.2937	2183	54.2937	2035	44.435	1664	54.2937	1995	54.2937	2083
44.4554	858	54.3193	2143	54.3193	2032	44.4554	1697	54.3193	2043	54.3193	2013
44.4759	796	54.3449	2128	54.3449	2051	44.4759	1653	54.3449	2015	54.3449	2080
44.4964	771	54.3705	2170	54.3705	2044	44.4964	1724	54.3705	2083	54.3705	2073
44.5168	796	54.3961	2151	54.3961	1994	44.5168	1624	54.3961	2056	54.3961	2020
44.5373	807	54.4216	2156	54.4216	2044	44.5373	1693	54.4216	2009	54.4216	2109
44.5578	819	54.4472	2151	54.4472	2093	44.5578	1656	54.4472	2026	54.4472	2069
44.5782	812	54.4728	2141	54.4728	2067	44.5782	1610	54.4728	2066	54.4728	2132
44.5987	819	54.4984	2161	54.4984	2036	44.5987	1640	54.4984	1949	54.4984	2059
44.6192	813	54.524	2159	54.524	2016	44.6192	1698	54.524	1967	54.524	2040
44.6396	875	54.5495	2145	54.5495	2078	44.6396	1659	54.5495	2037	54.5495	2071
44.6601	793	54.5751	2194	54.5751	2038	44.6601	1651	54.5751	1985	54.5751	2154
44.6806	809	54.6007	2130	54.6007	2060	44.6806	1598	54.6007	2058	54.6007	2012
44.701	771	54.6263	2110	54.6263	2090	44.701	1756	54.6263	2029	54.6263	2089
44.7215	825	54.6519	2186	54.6519	2010	44.7215	1711	54.6519	2079	54.6519	1996
44.742	821	54.6774	2140	54.6774	2060	44.742	1690	54.6774	1958	54.6774	2006
44.7624	766	54.703	2108	54.703	2136	44.7624	1623	54.703	1900	54.703	2032
44.7829	837	54.7286	2156	54.7286	2113	44.7829	1674	54.7286	2079	54.7286	2064
44.8033	829	54.7542	2229	54.7542	2046	44.8033	1753	54.7542	2009	54.7542	2014
44.8238	762	54.7798	2171	54.7798	2015	44.8238	1617	54.7798	1994	54.7798	2081
44.8443	787	54.8053	2131	54.8053	2062	44.8443	1663	54.8053	2080	54.8053	2100
44.8647	845	54.8309	2272	54.8309	2107	44.8647	1673	54.8309	2060	54.8309	2064
44.8852	809	54.8565	2190	54.8565	1948	44.8852	1701	54.8565	2006	54.8565	2047
44.9057	780	54.8821	2082	54.8821	2009	44.9057	1684	54.8821	1985	54.8821	2091
44.9261	811	54.9077	2145	54.9077	2142	44.9261	1635	54.9077	2006	54.9077	2173
44.9466	788	54.9332	2184	54.9332	2045	44.9466	1664	54.9332	1994	54.9332	2082
44.9671	830	54.9588	2164	54.9588	2088	44.9671	1635	54.9588	2008	54.9588	1920
44.9875	792	54.9844	2139	54.9844	2063	44.9875	1716	54.9844	2030	54.9844	2062
45.008	840	55.01	2107	55.01	2121	45.008	1716	55.01	2082	55.01	2084
45.0285	787	55.0356	2111	55.0356	2019	45.0285	1699	55.0356	2033	55.0356	2046
45.0489	818	55.0611	2109	55.0611	2030	45.0489	1684	55.0611	2065	55.0611	2098
45.0694	803	55.0867	2116	55.0867	2179	45.0694	1627	55.0867	2053	55.0867	1969
45.0898	826	55.1123	2158	55.1123	2113	45.0898	1700	55.1123	2066	55.1123	2073
45.1103	832	55.1379	2191	55.1379	2045	45.1103	1665	55.1379	2068	55.1379	2059
45.1308	823	55.1635	2199	55.1635	2068	45.1308	1704	55.1635	1959	55.1635	2111
45.1512	808	55.1891	2153	55.1891	2038	45.1512	1559	55.1891	2037	55.1891	2077
45.1717	786	55.2146	2207	55.2146	1994	45.1717	1610	55.2146	2076	55.2146	2025
45.1922	818	55.2402	2096	55.2402	2111	45.1922	1680	55.2402	2086	55.2402	2095
45.2126	873	55.2658	2134	55.2658	2036	45.2126	1685	55.2658	2083	55.2658	2059
45.2331	782	55.2914	2130	55.2914	2018	45.2331	1568	55.2914	2089	55.2914	2002
45.2536	839	55.317	2169	55.317	2101	45.2536	1646	55.317	2087	55.317	2114
45.274	802	55.3425	2139	55.3425	2101	45.274	1682	55.3425	2076	55.3425	2064
45.2945	772	55.3681	2117	55.3681	2095	45.2945	1642	55.3681	1974	55.3681	2064
45.315	740	55.3937	2128	55.3937	2053	45.315	1623	55.3937	2040	55.3937	2022
45.3354	738	55.4193	2160	55.4193	2073	45.3354	1706	55.4193	2030	55.4193	1975
45.3559	839	55.4449	2142	55.4449	2003	45.3559	1574	55.4449	2007	55.4449	2117
45.3763	797	55.4704	2166	55.4704	2093	45.3763	1654	55.4704	2045	55.4704	2025
45.3968	791	55.496	2107	55.496	2104	45.3968	1709	55.496	1998	55.496	2095
45.4173	806	55.5216	2130	55.5216	2207	45.4173	1659	55.5216	1960	55.5216	2073
45.4377	848	55.5472	2178	55.5472	2105	45.4377	1655	55.5472	2025	55.5472	2035
45.4582	844	55.5728	2183	55.5728	2033	45.4582	1647	55.5728	2026	55.5728	2156
45.4787	797	55.5983	2215	55.5983	2077	45.4787	1620	55.5983	2016	55.5983	2063
45.4991	774	55.6239	2210	55.6239	2059	45.4991	1638	55.6239	2024	55.6239	2051
45.5196	798	55.6495	2096	55.6495	2044	45.5196	1668	55.6495	2062	55.6495	2080
45.5401	830	55.6751	2181	55.6751	2056	45.5401	1628	55.6751	2045	55.6751	2008
45.5605	823	55.7007	2199	55.7007	2111	45.5605	1642	55.7007	2069	55.7007	2012
45.581	825	55.7262	2111	55.7262	2080	45.581	1609	55.7262	2015	55.7262	2147
45.6015	780	55.7518	2192	55.7518	2078	45.6015	1611	55.7518	2052	55.7518	2027
45.6219	768	55.7774	2196	55.7774	2121	45.6219	1692	55.7774	2062	55.7774	2005
45.6424	817	55.803	2130	55.803	2006	45.6424	1661	55.803	2087	55.803	2027
45.6629	811	55.8286	2105	55.8286	2098	45.6629	1659	55.8286	2015	55.8286	2050
45.6833	853	55.8541	2121	55.8541	2140	45.6833	1660	55.8541	2001	55.8541	2001
45.7038	798	55.8797	2171	55.8797	2102	45.7038	1709	55.8797	1927	55.8797	2112
45.7242	790	55.9053	2133	55.9053	2155	45.7242	1639	55.9053	2053	55.9053	2060
45.7447	787	55.9309	2145	55.9309	2108	45.7447	1650	55.9309	2006	55.9309	2094
45.7652	835	55.9565	2141	55.9565	2041	45.7652	1646	55.9565	2074	55.9565	2120
45.7856	806	55.982	2157	55.982	2105	45.7856	1607	55.982	2061	55.982	2143
45.8061	823	56.0076	2109	56.0076	2090	45.8061	1727	56.0076	2071	56.0076	2113
45.8266	792	56.0332	2175	56.0332	2102	45.8266	1645	56.0332	1993	56.0332	2058
45.847	850	56.0588	2195	56.0588	2080	45.847	1692	56.0588	1989	56.0588	2091
45.8675	777	56.0844	2163	56.0844	2038	45.8675	1693	56.0844	1981	56.0844	2005
[truncated: 936 more rows]

## Sheet: Figure 6
			Magnetic susceptibility (χ, %)														Frequency-dependent susceptibility (χfd%, %)
		Time (d)	0	1	2	3	4	5	6	7	8	9	10	11	12	13	0	1	2	3	4	5	6	7	8	9	10	11	12	13
Biotic systems	0 mM acetate + CM + NO3-	AVERAGE	0	-2.6616	-5.34312	-6.34863	-6.98474	-7.69418	-8.50205	-8.86193	-9.69457	-10.2688	-10.6982	-10.9403	-11.2003	-11.5402	4.80739	4.59825	4.12775	4.49132	4.40694	4.53884	4.40295	4.42814	4.62975	4.40691	4.46974	4.44048	4.61438	4.7246
		STDEV	0	0.334739	1.09378	1.25848	1.15224	1.30057	1.41208	1.59413	1.36349	1.39599	1.22376	1.21409	1.20463	1.05666	0.0343881	0.183999	0.249364	0.0213754	0.068456	0.134098	0.164249	0.0211583	0.155526	0.0321445	0.0741946	0.012445	0.0657239	0.0291306
	0.5 mM acetate + CM + NO3-	AVERAGE	0	-2.59261	-4.09343	-5.30186	-6.30607	-7.46253	-8.27139	-8.8579	-10.1198	-10.6081	-11.3099	-11.6035	-11.763	-12.4296	4.68121	5.01544	4.34383	4.65248	4.56036	4.64618	4.46463	4.56195	4.5456	4.39154	4.41661	4.44152	4.81239	4.76618
		STDEV	0	0.4392	0.569839	0.413024	0.219551	0.4646	0.682216	0.785658	1.01811	0.907509	0.948721	1.13862	0.988683	1.15534	0.0360837	0.229547	0.0694738	0.0296164	0.186525	0.0738216	0.0967205	0.14494	0.0374783	0.0457699	0.00138176	0.0226842	0.078101	0.113994
	5 mM acetate + CM + NO3-	AVERAGE	0	-2.85655	-3.94866	-5.38245	-5.90053	-6.53483	-7.61053	-8.08537	-8.87339	-8.94531	-9.47398	-9.4918	-9.63502	-10.0022	4.86252	5.02479	4.42002	4.50556	4.39747	4.849	4.35291	4.43383	4.23619	4.36748	4.32374	4.46313	4.58916	4.73729
		STDEV	0	0.170097	0.33982	0.127167	0.528886	0.993127	0.732303	0.690996	0.736172	0.659672	0.592656	0.617865	0.6422	0.652309	0.257454	0.0389878	0.015155	0.108538	0.0210026	0.0364669	0.0453084	0.011337	0.175993	0.137897	0.0158074	0.0413609	0.0146607	0.198378
	0 mM acetate + HM + NO3-	AVERAGE	0	-1.75352	-2.44036	-2.96951	-3.32514	-3.53032	-3.79081	-3.72772	-4.05145	-4.28054	-4.35943	-4.43842	-4.28059	-4.39113	3.78633	3.85136	3.63602	3.98905	3.81564	3.84839	3.62895	3.73315	3.83639	3.63923	3.74962	3.72793	3.93627	3.91605
		STDEV	0	0.0145062	0.178998	0.210146	0.130362	0.218811	0.295842	0.251441	0.305848	0.293654	0.337984	0.337631	0.271312	0.293159	0.179686	0.118971	0.191989	0.101286	0.0227607	0.0316261	0.074722	0.0278793	0.0747681	0.0167669	0.0735836	0.0853138	0.0285798	0.0178772
	0.5 mM acetate + HM + NO3-	AVERAGE	0	-1.1234	-1.88268	-2.42835	-2.7765	-2.99002	-3.32238	-3.33822	-3.69414	-3.89194	-4.06605	-4.08971	-3.94738	-4.14526	3.90731	4.247	3.78052	3.82606	3.82346	3.86442	3.47523	3.76382	3.7614	3.62912	3.65188	3.72716	3.91119	3.96868
		STDEV	0	0.249083	0.27349	0.241401	0.354184	0.343572	0.478683	0.501095	0.513235	0.56969	0.659637	0.603776	0.625763	0.749328	0.234186	0.124956	0.0320854	0.0655892	0.0472007	0.0240597	0.401523	0.0296149	0.0533697	0.0196159	0.0466989	0.0131787	0.0243349	0.00667217
	5 mM acetate + HM + NO3-	AVERAGE	0	-2.16592	-2.66691	-3.51498	-4.06251	-4.3094	-4.49436	-4.34781	-4.58675	-4.60261	-4.60283	-4.46463	-4.22599	-4.3721	4.05543	4.05705	3.68229	3.9547	3.86477	3.87442	3.7203	3.81159	3.75645	3.75689	3.85446	3.80744	4.01411	4.06986
		STDEV	0	0.068989	0.0999996	0.009924	0.133642	0.265291	0.244113	0.189112	0.179018	0.440701	0.571516	0.898085	1.0826	0.87597	0.134632	0.021776	0.248937	0.0468527	0.0298069	0.0786944	0.149131	0.0593602	0.0830846	0.0956466	0.0475441	0.133909	0.27114	0.119958
Abiotic systems	HM + NO3-	AVERAGE	0	0.099552	0.0282064	-0.0116144	-0.0481168	-0.0798241	-0.0618882	-0.0962336	-0.144848	-0.426912	-0.74216	-0.99104	-0.692384	-0.874896	3.8518	4.07024	4.04434	3.6711	3.80127	3.71237	3.47141	3.6187	3.65895	3.60209	3.69807	3.62282	3.94937	3.85526
		STDEV	0	0.0145062	0.178998	0.210146	0.130362	0.218811	0.295842	0.251441	0.305848	0.293654	0.337984	0.337631	0.271312	0.293159	0.0360837	0.229547	0.0694738	0.0296164	0.186525	0.0738216	0.0967205	0.14494	0.0374783	0.0457699	0.00138176	0.0226842	0.078101	0.113994
	CM + NO3-	AVERAGE	0	0.277718	0.341807	0.747703	0.192267	-0.128178	-0.341807	-0.234993	-0.619526	-0.683615	-0.747703	-0.726341	-0.469985	-0.683615	4.7941	4.73509	4.10786	4.26209	4.34968	4.32086	4.15863	4.30407	4.23474	4.0869	4.26173	4.34689	4.63619	4.60314
		STDEV	0	0.0145062	0.178998	0.210146	0.130362	0.218811	0.295842	0.251441	0.305848	0.293654	0.337984	0.337631	0.271312	0.293159	0.134632	0.021776	0.248937	0.0468527	0.0298069	0.0786944	0.149131	0.0593602	0.0830846	0.0956466	0.0475441	0.133909	0.27114	0.119958
	HM + NO2-	AVERAGE	0	-0.514326		-1.41976		-1.52822		-1.94222			-2.94222			-2.9975	3.85136	3.78052		3.9547		3.82346		3.84839			3.76382			3.85446
		STDEV	0	0.170097		0.33982		0.127167		0.528886			0.993127			0.732303	0.401523	0.0296149		0.0533697		0.0196159		0.0466989			0.0131787			0.0243349
	CM + NO2-	AVERAGE	0	-2.00992		-4.73527		-6.80821		-8.06104			-8.06104			-9.03316	4.80739	5.01544		4.50556		4.56036		4.53884			4.46463			4.43383
		STDEV	0	0.249083		0.27349		0.241401		0.354184			0.343572			0.478683	0.0593602	0.0830846		0.0956466		0.0475441		0.133909			0.27114			0.119958

## Sheet: Figure 7
	X							Y						Y
	|Δχ| value of magnetite NPs (%)							DNRA ratio (%)						Denitrification ratio (%)
0 mM acetate + CM + NO3-	AVERAGE	0	2.6616	6.34863	8.50205	10.6982	11.5402	0	9.10427	20.5202	20.7562	27.962	36.6108	0	14.5982	38.0186	50.9745	55.2981	51.7502
	STDEV	0	0.334739	1.25848	1.41208	1.22376	1.05666	0	0.773481	5.47552	2.93245	3.31652	6.6569	0	3.01006	5.05836	3.53116	9.13303	2.67213
0.5 mM acetate + CM + NO3-	AVERAGE	0	2.59261	5.30186	8.27139	11.3099	12.4296	0	9.04173	17.0902	23.1864	24.8073	26.4822	0	26.4246	50.4522	60.1832	63.7582	63.112
	STDEV	0	0.4392	0.413024	0.682216	0.948721	1.15534	0	0.846077	1.13954	2.0041	0.78096	3.55258	0	2.93635	10.6331	0.956366	1.00926	6.8212
5 mM acetate + CM + NO3-	AVERAGE	0	2.85655	5.38245	7.61053	9.47398	10.0022	0	7.3664	14.4287	17.1976	19.0844	23.8089	0	67.0744	83.3632	81.8311	80.8525	76.1911
	STDEV	0	0.170097	0.127167	0.732303	0.592656	0.652309	0	0.0659966	0.829358	0.868956	4.61536	3.45203	0	8.03369	0.827398	0.879736	4.60458	3.45203
0 mM acetate + HM + NO3-	AVERAGE	0	1.75352	2.96951	3.79081	4.35943	4.39113	0	1.63013	8.22044	16.4633	24.5989	26.6963	0	13.1736	34.7293	42.8666	49.5378	52.7674
	STDEV	0	0.0145062	0.210146	0.295842	0.337984	0.293159	0	0.340543	4.56697	2.0569	2.80046	5.59699	0	1.67367	1.53546	15.9392	14.1025	5.59699
0.5 mM acetate + HM + NO3-	AVERAGE	0	1.1234	2.42835	3.32238	4.06605	4.14526	0	1.2512	2.97356	6.21067	8.73689	13.8089	0	24.5	55.9789	67.4551	82.6177	82.9275
	STDEV	0	0.249083	0.241401	0.478683	0.259637	0.349328	0	0.311504	0.59177	0.171592	0.0439978	0.873114	0	0.250729	4.70209	8.75934	11.4842	8.14335
5 mM acetate + HM + NO3-	AVERAGE	0	2.16592	3.51498	4.49436	4.60283	4.3721	0	0	1.22044	4.05622	5.26956	6.86398	0	68.7905	96.5826	95.2357	94.6632	93.136
	STDEV	0	0.068989	0.009924	0.244113	0.571516	0.37597	0	0	0.413579	0.147393	0.0373977	0.770843	0	1.28828	2.1243	0.139552	0.0305374	0.770843

## Sheet: Figure S1
HM pristine												Bio-trated HM in 0 mM acetate										Bio-trated HM in 5 mM acetate										CM pristine												Bio-trated CM in 0 mM acetate
Binding energy (ev)	Raw data	Sum peak	Background	Fe2+ 2p3/2	Fe2+ 2p1/2	Fe2+ (Satellite 1)	Fe2+ (Satellite 2)	Fe3+ 2p3/2	Fe3+ 2p1/2	Fe3+ (Satellite 1)	Fe3+ (Satellite 2)	Binding energy (ev)	Raw data	Sum peak	Background	Fe2+ 2p3/2	Fe2+ 2p1/2	Fe3+ 2p3/2	Fe3+ 2p1/2	Satellite 1	Satellite 2	Binding energy (ev)	Raw data	Sum peak	Background	Fe2+ 2p3/2	Fe2+ 2p1/2	Fe3+ 2p3/2	Fe3+ 2p1/2	Satellite 1	Satellite 2	Binding energy (ev)	Raw data	Sum peak	Background	Fe2+ 2p3/2	Fe2+ 2p1/2	Fe2+ (Satellite 1)	Fe2+ (Satellite 2)	Fe3+ 2p3/2	Fe3+ 2p1/2	Fe3+ (Satellite 1)	Fe3+ (Satellite 2)	Binding energy (ev)	Raw data	Sum peak	Background	Fe2+ 2p3/2	Fe2+ 2p1/2
739.9	39587	39576.7	39657.1	39657.1	39657.1	39657.1	39657.1	39661.9	39657.1	39562.8	39666.3	741.1	43398.6	43454.3	43373.6	43373.6	43373.6	43373.6	43373.6	43448.4	43379.5		41323.2	41829.5	41288.2	41288.2	41288.2	41288.2	41288.6	41410.2	41707.1		51056.4	51746.1	51588.1	51615.9	51643.5	51588.1	51588.2	51601.8	51621.9	51588.1	51615.5	741.1	32655	32936.9	32655	32659.3	32664.2
739.8	39309.1	39578.2	39657.4	39657.4	39657.4	39657.4	39657.4	39662.2	39657.4	39562.9	39667.9	741	43884.7	43430.6	43348.4	43348.4	43348.4	43348.4	43348.4	43423.9	43355.2	735.9	41154.1	41829.9	41253	41253	41253	41253	41253.5	41376.3	41706.2	739.4	51874.9	51792	51628.6	51656.6	51684.7	51628.6	51628.6	51642.4	51662.9	51628.6	51660	741	32929.3	32941.2	32655	32659.3	32664.3
739.7	39524.5	39583	39660.8	39660.8	39660.8	39660.8	39660.8	39665.6	39660.8	39566.2	39672.8	740.9	43073.2	43404	43320.2	43320.2	43320.2	43320.2	43320.2	43396.3	43327.8	735.8	41481.1	41833.1	41218.6	41218.6	41218.6	41218.6	41219.1	41343.2	41708	739.3	51660	51834.9	51665.6	51693.7	51722.4	51665.6	51665.6	51679.5	51700.3	51665.6	51701.5	740.9	33000.9	32943.4	32652.7	32657	32662
739.6	39759.6	39585.6	39661.8	39661.8	39661.8	39661.8	39661.8	39666.7	39661.8	39567.1	39675.5	740.8	43648.5	43382.2	43296.7	43296.7	43296.7	43296.7	43296.7	43373.5	43305.4	735.7	42282	41836.4	41182.1	41182.1	41182.1	41182.1	41182.8	41308.1	41709.8	739.2	51997.9	51881.6	51705.7	51734	51763.2	51705.7	51705.7	51719.6	51740.8	51705.7	51746.6	740.8	32866.3	32945.1	32649.7	32654.1	32659.2
739.5	39990.7	39585.8	39660.2	39660.2	39660.2	39660.2	39660.2	39665.1	39660.2	39565.3	39675.8	740.7	44630.7	43357	43269.5	43269.5	43269.5	43269.5	43269.5	43347	43279.5	735.6	41892	41837.2	41141	41141	41141	41141	41141.8	41268.3	41709	739.1	51716.7	51925.2	51742	51770.6	51800.3	51742	51742	51756.1	51777.7	51742	51788.6	740.7	33768.3	32948	32647.8	32652.2	32657.5
739.4	39734.2	39583.6	39656	39656	39656	39656	39656	39660.9	39656	39561	39673.7	740.6	43165.9	43325.7	43236.1	43236.1	43236.1	43236.1	43236.1	43314.3	43247.5	735.5	42555	41841.9	41101.8	41101.8	41101.8	41101.8	41102.8	41230.6	41712.3	739	51587.6	51973.4	51782.3	51811.1	51841.4	51782.3	51782.3	51796.5	51818.5	51782.3	51835.3	740.6	33121.5	32943.3	32638.3	32642.7	32648
739.3	39319.6	39584.5	39654.7	39654.7	39654.7	39654.7	39654.7	39659.6	39654.7	39559.5	39674.7	740.5	42555.6	43303.4	43211.6	43211.6	43211.6	43211.6	43211.6	43290.4	43224.5	735.4	42387.4	41844.9	41058.8	41058.8	41058.8	41058.8	41059.9	41188.9	41713.7	738.9	51575.7	52024.5	51824.8	51853.7	51884.6	51824.8	51824.8	51839.1	51861.4	51824.8	51884.8	740.5	32752.4	32944.2	32634.2	32638.6	32644
739.2	39307.9	39590.2	39657.9	39657.9	39657.9	39657.9	39657.9	39662.9	39657.9	39562.6	39680.6	740.4	42898.5	43284.9	43190.6	43190.6	43190.6	43190.6	43190.6	43270.2	43205.3	735.3	42128	41850.8	41016.4	41016.4	41016.4	41016.4	41017.7	41148	41717.9	738.8	51462.7	52077.1	51867.8	51897	51928.5	51867.8	51867.9	51882.2	51905	51867.8	51935.8	740.4	33038.8	32948.4	32633.2	32637.7	32643.1
739.1	39475.9	39596.5	39661.3	39661.3	39661.3	39661.3	39661.3	39666.3	39661.3	39565.8	39686.9	740.3	43331.3	43264.3	43167.4	43167.4	43167.4	43167.4	43167.4	43247.7	43184.1	735.2	42389.4	41860	40975.3	40975.3	40975.3	40975.3	40976.8	41108.3	41725.4	738.7	51508.8	52132.6	51912.9	51942.2	51974.3	51912.9	51912.9	51927.4	51950.6	51912.9	51989.6	740.3	33546.6	32950.3	32629.7	32634.2	32639.8
739	39318	39601.2	39662.9	39662.9	39662.9	39662.9	39662.9	39667.9	39662.9	39567.3	39691.8	740.2	42806.8	43241.2	43141.4	43141.4	43141.4	43141.4	43141.4	43222.4	43160.3	735.1	43170	41869.7	40932.4	40932.4	40932.4	40932.4	40934.2	41067	41733.3	738.6	51794	52189.1	51957.9	51987.4	52020.2	51957.9	51957.9	51972.5	51996.1	51957.9	52044.4	740.2	32640.6	32947.9	32621.9	32626.4	32632.1
738.9	38992.6	39608.2	39666.2	39666.2	39666.2	39666.2	39666.2	39671.3	39666.2	39570.5	39698.8	740.1	43292	43221.5	43118.4	43118.4	43118.4	43118.4	43118.4	43200.2	43139.8	735	42196	41876.8	40885.1	40885.1	40885.1	40885.1	40887.2	41021.1	41738.6	738.5	51959.8	52243.6	51999.9	52029.7	52063.1	51999.9	51999.9	52014.6	52038.7	51999.9	52097.2	740.1	32376.3	32953.5	32621.7	32626.3	32632
738.8	39431.8	39619.1	39673.2	39673.2	39673.2	39673.2	39673.2	39678.4	39673.2	39577.4	39709.9	740	43334.6	43198.9	43092.4	43092.4	43092.4	43092.4	43092.4	43174.8	43116.4	734.9	41651.9	41891.2	40842.8	40842.8	40842.8	40842.8	40845.3	40980.4	41751	738.4	51871.3	52297.8	52040.4	52070.4	52104.4	52040.4	52040.4	52055.2	52079.8	52040.4	52149.7	740	32376.3	32961.4	32623.8	32628.4	32634.2
738.7	39713.1	39625.7	39675.4	39675.4	39675.4	39675.4	39675.4	39680.6	39675.4	39579.4	39716.6	739.9	43349.9	43176.2	43065.9	43065.9	43065.9	43065.9	43065.9	43149.1	43093	734.8	41755.6	41910.3	40803.3	40803.3	40803.3	40803.3	40806.2	40942.5	41768.2	738.3	51848.7	52354.9	52082.5	52112.7	52147.4	52082.5	52082.5	52097.4	52122.4	52082.5	52204.9	739.9	32431.3	32969.6	32625.9	32630.6	32636.5
738.6	39590.4	39629.6	39674.5	39674.5	39674.5	39674.5	39674.5	39679.7	39674.5	39578.3	39720.6	739.8	43097	43153.6	43039.2	43039.2	43039.2	43039.2	43039.2	43123.1	43069.7	734.7	41885.6	41930.6	40763	40763	40763	40763	40766.5	40903.8	41786.4	738.2	51592.7	52414.1	52125.4	52155.8	52191.2	52125.4	52125.4	52140.5	52165.9	52125.4	52262.3	739.8	32808.2	32977.5	32627.6	32632.2	32638.3
738.5	39408	39635.4	39674.9	39674.9	39674.9	39674.9	39674.9	39680.2	39675	39578.7	39726.5	739.7	44134.1	43132.8	43013.8	43013.8	43013.8	43013.8	43013.8	43098.5	43048.1	734.6	42026.7	41951.8	40721.8	40721.8	40721.8	40721.8	40725.8	40864.2	41805.4	738.1	52063.5	52478.5	52172	52202.6	52238.8	52172	52172	52187.2	52213.2	52172	52324.8	739.7	32048.6	32982.4	32626	32630.7	32636.9
738.4	39462.9	39643.9	39677.4	39677.4	39677.4	39677.4	39677.4	39682.7	39677.4	39581	39735	739.6	43106.6	43105.9	42981.9	42981.9	42981.9	42981.9	42981.9	43067.4	43020.4	734.5	41304.7	41973.8	40679.6	40679.6	40679.6	40679.6	40684.3	40823.6	41825	738	52221.9	52539.1	52213.4	52244.2	52281	52213.4	52213.4	52228.6	52255.2	52213.4	52383.5	739.6	31932.5	32994.1	32631	32635.7	32641.9
738.3	39498.2	39652.3	39679.3	39679.3	39679.3	39679.3	39679.3	39684.6	39679.3	39582.8	39743.5	739.5	42591	43085.6	42956.1	42956.1	42956.1	42956.1	42956.1	43042.5	42999.2	734.4	41469.2	42001.1	40641.1	40641.1	40641.1	40641.1	40646.6	40786.9	41849.9	737.9	52063.5	52599.9	52253.3	52284.3	52321.9	52253.3	52253.3	52268.7	52295.7	52253.3	52442.4	739.5	33299.9	33006.9	32636.9	32641.7	32648
738.2	39314.6	39661	39680.8	39680.8	39680.8	39680.8	39680.8	39686.2	39680.9	39584.1	39752.3	739.4	42904.1	43068.7	42933.4	42933.4	42933.4	42933.4	42933.4	43020.5	42981.6	734.3	41977.4	42029	40601.5	40601.5	40601.5	40601.5	40607.9	40749	41875.2	737.8	52293.5	52664.9	52295.6	52326.9	52365.2	52295.6	52295.6	52311.1	52338.7	52295.6	52505.4	739.4	32257	33008.5	32631.3	32636.1	32642.5
738.1	39541.9	39672.4	39684.4	39684.4	39684.4	39684.4	39684.4	39689.8	39684.4	39587.6	39763.9	739.3	42052.5	43050.4	42908.6	42908.6	42908.6	42908.6	42908.6	42996.5	42962.4	734.2	41617.2	42055.2	40558.9	40558.9	40558.9	40558.9	40566.3	40708.1	41898.7	737.7	52849.4	52729.4	52335.7	52367.2	52406.3	52335.7	52335.7	52351.3	52379.4	52335.7	52567.9	739.3	32918.4	33019.1	32634.5	32639.3	32645.9
738	39285.6	39682.1	39685.5	39685.5	39685.5	39685.5	39685.5	39690.9	39685.5	39588.5	39773.6	739.2	42120.8	43037.7	42888.8	42888.8	42888.8	42888.8	42888.8	42977.6	42948.9	734.1	42052	42084.6	40518.1	40518.1	40518.1	40518.1	40526.6	40669	41925	737.6	52588.8	52789.5	52369.3	52401	52440.9	52369.3	52369.3	52385	52413.8	52369.3	52625.9	739.2	32718.2	33024.4	32632	32636.9	32643.6
737.9	39036.3	39695.4	39689.5	39689.5	39689.5	39689.5	39689.5	39694.9	39689.5	39592.4	39787.1	739.1	42667.5	43025.1	42868.6	42868.6	42868.6	42868.6	42868.6	42958.2	42935.5	734	42049.7	42112.3	40474.6	40474.6	40474.6	40474.6	40484.5	40627.3	41949.7	737.5	52757.6	52855.2	52406.6	52438.5	52479.2	52406.6	52406.6	52422.4	52451.8	52406.6	52689.5	739.1	32660.1	33031.8	32631.3	32636.2	32643
737.8	39311.5	39712.5	39696.3	39696.3	39696.3	39696.3	39696.3	39701.8	39696.3	39599	39804.2	739	42743.2	43009.7	42844.8	42844.8	42844.8	42844.8	42844.8	42935.2	42919.2	733.9	42974.5	42140.9	40430.8	40430.8	40430.8	40430.8	40442.3	40585.4	41974.8	737.4	52798	52921.5	52442.2	52474.4	52516	52442.2	52442.2	52458.2	52488.2	52442.2	52753.5	739	32800.6	33039.9	32631	32636	32642.9
737.7	39436.4	39727.4	39700.1	39700.1	39700.1	39700.1	39700.1	39705.6	39700.1	39602.7	39819.2	738.9	42823.9	42994.4	42820.4	42820.4	42820.4	42820.4	42820.4	42911.7	42903.1	733.8	41375.7	42164.9	40381.7	40381.7	40381.7	40381.7	40395	40538.2	41995.2	737.3	52948.2	52989.9	52477.8	52510.2	52552.7	52477.8	52477.8	52493.9	52524.5	52477.8	52819.7	738.9	32986.5	33047.1	32629.6	32634.6	32641.6
737.6	39302.3	39741.9	39702.5	39702.5	39702.5	39702.5	39702.5	39708.1	39702.6	39605	39833.8	738.8	43352.7	42979.3	42795.4	42795.4	42795.4	42795.4	42795.4	42887.6	42887.1	733.7	41621.6	42198.2	40341.2	40341.2	40341.2	40341.2	40356.5	40499.6	42024.6	737.2	52746.9	53059.2	52511.9	52544.7	52587.9	52511.9	52511.9	52528.2	52559.5	52511.9	52886.7	738.8	33266	33053.1	32626.6	32631.6	32638.7
737.5	39525.9	39758.9	39706.5	39706.5	39706.5	39706.5	39706.5	39712.1	39706.5	39608.8	39850.9	738.7	42871.2	42961.7	42767	42767	42767	42767	42767	42860.1	42868.6	733.6	41858.5	42230.3	40299.1	40299.1	40299.1	40299.1	40316.7	40459.4	42052.4	737.1	53067.3	53133.8	52549	52582	52626.2	52549	52549	52565.4	52597.4	52549	52958.9	738.7	32969.7	33057.1	32621.1	32626.2	32633.4
737.4	39774.8	39774.5	39708	39708	39708	39708	39708	39713.7	39708.1	39610.2	39866.6	738.6	42046.8	42947.7	42741.3	42741.3	42741.3	42741.3	42741.3	42835.3	42853.7	733.5	42087.5	42261.1	40255.5	40255.5	40255.5	40255.5	40275.7	40417.7	42078.6	737	53127.1	53207.3	52582.6	52615.8	52660.9	52582.6	52582.6	52599.1	52631.9	52582.6	53030	738.6	32509.4	33063.9	32618.1	32623.2	32630.6
737.3	39768.8	39788.5	39706.7	39706.7	39706.7	39706.7	39706.7	39712.4	39706.8	39608.8	39880.6	738.5	42377.2	42939.6	42720.6	42720.6	42720.6	42720.6	42720.6	42815.5	42844.7	733.4	41868.7	42290.4	40210.4	40210.4	40210.4	40210.4	40233.5	40374.6	42103	736.9	52915.3	53283	52615.8	52649.3	52695.4	52615.8	52615.8	52632.5	52666	52615.8	53103.2	738.5	32395.9	33075.1	32619.1	32624.2	32631.7
737.2	39779	39803.7	39705.6	39705.6	39705.6	39705.6	39705.6	39711.3	39705.6	39607.5	39895.9	738.4	42488.4	42930.4	42697.7	42697.7	42697.7	42697.7	42697.7	42793.5	42834.5	733.3	42095.4	42320.6	40166.2	40166.2	40166.2	40166.2	40192.7	40332.4	42127.8	736.8	52985.8	53364.4	52652.1	52685.8	52732.9	52652.1	52652.1	52668.9	52703.3	52652.1	53182.1	738.4	33422.1	33087.7	32621	32626.1	32633.8
737.1	39857.2	39820	39704.2	39704.2	39704.2	39704.2	39704.2	39710	39704.3	39606.1	39912.2	738.3	42394.8	42921.5	42674	42674	42674	42674	42674	42770.8	42824.7	733.2	42429.7	42348.9	40120.5	40120.5	40120.5	40120.5	40150.8	40288.8	42150.2	736.7	53184.8	53448	52688	52721.9	52770	52688	52688	52704.9	52740.1	52688	53263	738.3	32750.6	33092.1	32614.1	32619.3	32627.1
737	39841.8	39836.6	39702	39702	39702	39702	39702	39707.9	39702.1	39603.7	39928.9	738.2	42950.1	42914.1	42650.7	42650.7	42650.7	42650.7	42650.7	42748.4	42816.4	733.1	42353.5	42374.5	40072.7	40072.7	40072.7	40072.7	40107.3	40243.2	42169.4	736.6	53091.8	53532.2	52721.8	52756	52805.1	52721.8	52721.8	52738.8	52775	52721.8	53344.5	738.2	32724.8	33102.6	32613	32618.2	32626.2
736.9	39918.3	39854.7	39700	39700	39700	39700	39700	39705.9	39700.1	39601.5	39947.1	738.1	43376	42904.5	42623.9	42623.9	42623.9	42623.9	42623.9	42722.6	42805.8	733	42614.6	42399.6	40025.1	40025.1	40025.1	40025.1	40064.5	40197.7	42187.5	736.5	53338.5	53620.7	52757.2	52791.7	52841.8	52757.2	52757.2	52774.4	52811.5	52757.2	53430.1	738.1	32370	33113.9	32612	32617.3	32625.4
736.8	39814.9	39873.3	39697	39697	39697	39697	39697	39703	39697.2	39598.5	39965.7	738	42695.3	42893.4	42594.2	42594.2	42594.2	42594.2	42594.2	42693.9	42793.7	732.9	42621.5	42421.9	39975.7	39975.7	39975.7	39975.7	40020.6	40150.5	42202.2	736.4	53154	53709.2	52790	52824.8	52876	52790	52790	52807.3	52845.5	52790	53515.7	738	32737.5	33128.8	32614.1	32619.4	32627.6
736.7	39540.6	39894.4	39695.2	39695.2	39695.2	39695.2	39695.2	39701.2	39695.4	39596.5	39986.8	737.9	42579.8	42887.7	42568.6	42568.6	42568.6	42568.6	42568.6	42669.3	42787	732.8	43184.6	42442.8	39926.1	39926.1	39926.1	39926.1	39977.1	40103.1	42214.7	736.3	53840.8	53803.1	52825.5	52860.5	52912.8	52825.5	52825.5	52842.9	52882.2	52825.5	53606.7	737.9	32402.7	33141.1	32613	32618.4	32626.8
736.6	39522.8	39919.9	39696.4	39696.4	39696.4	39696.4	39696.4	39702.5	39696.7	39597.6	40012.4	737.8	42409.3	42884	42543.6	42543.6	42543.6	42543.6	42543.6	42645.2	42782.3	732.7	42791.2	42458.9	39873	39873	39873	39873	39930.9	40052.3	42221.7	736.2	53538.7	53891.6	52852.9	52888.2	52941.7	52852.9	52852.9	52870.5	52910.9	52852.9	53692	737.8	32757.2	33157	32614.8	32620.2	32628.8
736.5	39720.8	39947.2	39697.9	39697.9	39697.9	39697.9	39697.9	39703.9	39698.2	39598.9	40039.7	737.7	42869.5	42882.7	42519.4	42519.4	42519.4	42519.4	42519.4	42622.1	42780	732.6	41983.3	42475.4	39821.8	39821.8	39821.8	39821.8	39887.4	40003.5	42228.2	736.1	53801.6	53986.8	52884.4	52920	52974.6	52884.4	52884.4	52902.1	52943.8	52884.4	53784	737.7	32608.8	33170.5	32613.6	32619	32627.7
736.4	40107.4	39973.8	39697.1	39697.1	39697.1	39697.1	39697.1	39703.2	39697.5	39598.1	40066.3	737.6	41933.2	42880.1	42492.2	42492.2	42492.2	42492.2	42492.2	42596	42776.3	732.5	42747.2	42494.4	39774.9	39774.9	39774.9	39774.9	39849	39958.9	42236.3	736	54123.1	54081.7	52913	52948.9	53004.7	52913	52913	52930.9	52973.9	52913	53875.5	737.6	32439.8	33186	32613.7	32619.1	32628
736.3	40089.2	39997.5	39692	39692	39692	39692	39692	39698.2	39692.5	39592.9	40090.1	737.5	42638.5	42884.8	42470.7	42470.7	42470.7	42470.7	42470.7	42575.5	42779.9	732.4	42508.6	42507.1	39723.4	39723.4	39723.4	39723.4	39807.1	39909.9	42237	735.9	54644.8	54175.4	52938	52974.1	53031.2	52938	52938	52956	53000.4	52938	53965.7	737.5	33171.1	33203.7	32615.1	32620.6	32629.7
736.2	39805.1	40023	39687.1	39687.1	39687.1	39687.1	39687.1	39693.3	39687.6	39587.8	40115.6	737.4	42823.8	42886.7	42444.6	42444.6	42444.6	42444.6	42444.6	42550.5	42780.8	732.3	43238.3	42518.8	39673	39673	39673	39673	39767.3	39861.9	42235.6	735.8	54843.8	54265.3	52956.8	52993.2	53051.6	52956.8	52956.8	52975	53020.9	52956.8	54051.9	737.4	33078.6	33216	32610.4	32615.9	32625.2
736.1	39925.9	40053.2	39685.3	39685.3	39685.3	39685.3	39685.3	39691.6	39685.9	39585.9	40145.7	737.3	42615.5	42889.2	42417.3	42417.3	42417.3	42417.3	42417.3	42524.3	42782.1	732.2	43596	42524.1	39618.2	39618.2	39618.2	39618.2	39724.3	39809.7	42226.5	735.7	54495.5	54355.3	52973.4	53010.1	53069.8	52973.4	52973.4	52991.7	53039.3	52973.4	54138	737.3	32567.1	33229.9	32606.4	32612	32621.4
736	40385.7	40083.5	39682.1	39682.1	39682.1	39682.1	39682.1	39688.4	39682.8	39582.5	40176	737.2	42640.8	42894.6	42391.1	42391.1	42391.1	42391.1	42391.1	42499.2	42786.5	732.1	42624.2	42524.8	39561.2	39561.2	39561.2	39561.2	39680.4	39755.2	42211.6	735.6	54682.8	54451.9	52994.5	53031.5	53092.5	52994.5	52994.6	53013	53062.3	52994.5	54230.6	737.2	32972.7	33249	32606.7	32612.3	32621.9
735.9	40450.4	40110.2	39673.8	39673.8	39673.8	39673.8	39673.8	39680.1	39674.6	39574.1	40202.7	737.1	42419.6	42901.8	42364.5	42364.5	42364.5	42364.5	42364.6	42473.8	42792.5	732	42432.7	42528.4	39509.2	39509.2	39509.2	39509.2	39643	39705.8	42198.1	735.5	54325	54548.3	53013.6	53050.9	53113.3	53013.6	53013.6	53032.2	53083.5	53013.6	54322.9	737.1	32654.3	33265.6	32603.6	32609.3	32619
735.8	40618.5	40137.7	39664.6	39664.6	39664.6	39664.6	39664.6	39671	39665.6	39564.8	40230.1	737	43438.8	42912.1	42339.2	42339.2	42339.2	42339.2	42339.2	42449.6	42801.7	731.9	42174.4	42530.3	39458	39458	39458	39458	39607.8	39657.3	42181.3	735.4	55071.2	54651.2	53037.3	53074.9	53138.7	53037.3	53037.3	53056.1	53109.4	53037.3	54421.3	737	32882.9	33285.8	32603.2	32608.9	32618.8
735.7	40455.8	40164.8	39653.4	39653.4	39653.4	39653.5	39653.4	39659.9	39654.6	39553.5	40257.1	736.9	43497.5	42918.1	42307.4	42307.4	42307.4	42307.4	42307.5	42419	42806.5	731.8	42352.1	42531.1	39408	39408	39408	39408	39575.5	39610	42161.7	735.3	54922.3	54746.7	53052.1	53090	53155.2	53052.1	53052.1	53071	53126.6	53052.1	54512.2	736.9	32884	33305.2	32600.8	32606.5	32616.7
735.6	40344.1	40195.1	39644	39644	39644	39644	39644	39650.5	39645.3	39543.9	40287.2	736.8	43161.7	42925.7	42275.1	42275.1	42275.1	42275.1	42275.2	42387.8	42812.9	731.7	42335.7	42528.2	39356.7	39356.7	39356.7	39356.7	39543.6	39561.5	42136.5	735.2	55154.1	54845.6	53068.9	53107.1	53173.9	53068.9	53068.9	53087.9	53146	53068.9	54606.2	736.8	33661.4	33325.6	32598.4	32604.2	32614.5
735.5	40027.3	40227.9	39635.7	39635.7	39635.7	39635.7	39635.7	39642.3	39637.2	39535.5	40319.9	736.7	43596.7	42937.3	42244.7	42244.7	42244.7	42244.7	42244.8	42358.6	42823.3	731.6	41807.7	42522.8	39305.2	39305.2	39305.2	39305.2	39513.6	39512.8	42106.7	735.1	55128	54942.9	53083	53121.5	53189.8	53083	53083	53102.2	53163	53083	54698.4	736.7	33267.7	33340.5	32589.3	32595.1	32605.7
735.4	39866.9	40265.7	39630.8	39630.8	39630.8	39630.8	39630.8	39637.4	39632.6	39530.5	40357.5	736.6	42925.8	42948.4	42211.4	42211.4	42211.4	42211.4	42211.5	42326.5	42833.1	731.5	42574.1	42517.6	39256.3	39256.3	39256.3	39256.3	39488.2	39466.8	42075.2	735	54771.4	55041.6	53097.6	53136.4	53206.4	53097.6	53097.7	53117	53180.7	53097.7	54791.6	736.6	32654.9	33359.9	32583.5	32589.4	32600.2
735.3	40341.3	40306.6	39627.7	39627.7	39627.7	39627.7	39627.7	39634.4	39629.8	39527.3	40398.1	736.5	41974.4	42965.6	42182	42182	42182	42182	42182.1	42298.3	42849.1	731.4	42850.5	42505.7	39202.9	39202.9	39202.9	39202.9	39460.6	39416.4	42034.5	734.9	55226.4	55145.4	53116.9	53156	53227.6	53116.9	53116.9	53136.4	53203.3	53116.9	54889.6	736.5	32972.9	33385.7	32582.9	32588.8	32599.8
735.2	40458.5	40343.4	39619.2	39619.2	39619.2	39619.2	39619.2	39626	39621.7	39518.7	40434.7	736.4	43034.9	42990.7	42158.3	42158.3	42158.3	42158.3	42158.4	42275.9	42872.9	731.3	42587.9	42489.8	39147.7	39147.7	39147.7	39147.7	39433.6	39364.2	41987.4	734.8	55499.6	55244.3	53130.7	53170.1	53243.4	53130.7	53130.7	53150.4	53220.8	53130.7	54982.3	736.4	33448.6	33410.1	32579.6	32585.5	32596.7
735.1	40486.5	40380.1	39609.3	39609.3	39609.3	39609.4	39609.3	39616.2	39612.2	39508.7	40471	736.3	43210.2	43011.6	42127.9	42127.9	42127.9	42127.9	42128	42246.8	42892.5	731.2	42147.6	42473	39093.7	39093.7	39093.7	39093.7	39410.3	39313.3	41936.8	734.7	55616.1	55339.8	53141.3	53181.1	53256.1	53141.3	53141.3	53161.2	53235.4	53141.3	55071.3	736.3	34167.7	33431.8	32572.2	32578.2	32589.6
735	40406.8	40417.5	39599.1	39599.1	39599.1	39599.1	39599.1	39605.9	39602.4	39498.3	40508	736.2	42430.9	43033.4	42096.2	42096.2	42096.2	42096.2	42096.4	42216.4	42913	731.1	42480.5	42456.5	39041.8	39041.8	39041.8	39041.8	39391.9	39264.5	41883.7	734.6	55545	55433.8	53150.6	53190.7	53267.5	53150.6	53150.6	53170.7	53249	53150.6	55158.3	736.2	33481.5	33448.6	32558.6	32564.6	32576.3
734.9	40424.6	40456.8	39589.6	39589.6	39589.6	39589.6	39589.6	39596.5	39593.4	39488.7	40546.8	736.1	43479.8	43062.3	42069.2	42069.2	42069.2	42069.2	42069.4	42190.7	42940.5	731	42025.1	42436.2	38987.7	38987.7	38987.7	38987.7	39374.2	39213.7	41823.7	734.5	55711.4	55528.2	53160.9	53201.3	53280	53160.9	53160.9	53181.1	53264.1	53160.9	55245.2	736.1	33582.2	33472.7	32550.7	32556.8	32568.7
734.8	40601.7	40496.7	39579.7	39579.7	39579.7	39579.8	39579.7	39586.7	39584.2	39478.8	40586.2	736	42663.5	43086.8	42035.5	42035.5	42035.5	42035.5	42035.8	42158.3	42963.6	730.9	42647.5	42416.7	38935.9	38935.9	38935.9	38935.9	39361.9	39165.2	41761.3	734.4	56004.7	55619.7	53169.2	53210	53290.6	53169.2	53169.3	53189.7	53277.6	53169.3	55328.8	736	33212.1	33497.3	32541.9	32548	32560.2
734.7	40244.9	40535.3	39567.8	39567.8	39567.8	39567.9	39567.8	39574.9	39573	39466.7	40624.2	735.9	42963.5	43118.4	42006.6	42006.6	42006.6	42006.6	42007	42130.8	42993.9	730.8	42283.6	42392.2	38880.3	38880.3	38880.3	38880.3	39349.2	39113	41690.6	734.3	56195.7	55706.5	53174.1	53215.2	53297.8	53174.1	53174.1	53194.7	53288.1	53174.1	55407.1	735.9	33439.9	33526.6	32536.2	32542.4	32554.8
734.6	40209.1	40578.6	39559.8	39559.8	39559.8	39559.8	39559.8	39566.9	39565.8	39458.6	40666.6	735.8	43855.3	43150.4	41975.8	41975.8	41975.8	41975.8	41976.2	42101.3	43024.3	730.7	42098.7	42368.5	38826.5	38826.5	38826.5	38826.5	39341.7	39062.6	41617.2	734.2	55994.3	55789.4	53176.6	53218	53302.6	53176.6	53176.6	53197.3	53296.8	53176.6	55480.9	735.8	33116.7	33555.4	32528.5	32534.7	32547.3
734.5	40758.7	40622.7	39552	39552	39552	39552.1	39552	39559.2	39558.9	39450.7	40709.9	735.7	43040.1	43178.8	41939.2	41939.2	41939.2	41939.2	41939.7	42066.2	43051.3	730.6	42057.2	42344.8	38773.4	38773.4	38773.4	38773.4	39338.5	39013.1	41539.9	734.1	55827	55873.1	53181.6	53223.4	53310.1	53181.6	53181.6	53202.6	53308.6	53181.7	55554.8	735.7	33985.8	33588.6	32523.5	32529.7	32542.7
734.4	40678.9	40661	39538.1	39538.1	39538.1	39538.2	39538.1	39545.3	39546	39436.6	40747.2	735.6	43349.3	43214.3	41907.4	41907.4	41907.4	41907.4	41908.1	42035.9	43085.3	730.5	42608.6	42320.7	38720.2	38720.2	38720.2	38720.2	39339.2	38963.5	41458.4	734	55843.8	55956.7	53188.8	53230.9	53319.8	53188.8	53188.8	53209.9	53323.2	53188.8	55628	735.6	33078.2	33616.1	32511	32517.3	32530.5
734.3	40718.2	40700.4	39524.8	39524.8	39524.8	39524.9	39524.8	39532.1	39534	39423.3	40785.5	735.5	42931.4	43249.8	41873.6	41873.6	41873.6	41873.6	41874.3	42003.5	43119.2	730.4	43036.6	42293.3	38663.6	38663.6	38663.7	38663.6	39340.5	38910.7	41369.3	733.9	56484.9	56037.8	53195.9	53238.4	53329.5	53195.9	53195.9	53217.2	53338.4	53195.9	55697.8	735.5	33602.5	33652.8	32506.1	32512.5	32526
734.2	40735.2	40739.3	39511	39511	39511	39511.1	39511	39518.4	39521.5	39409.4	40823.1	735.4	42978	43289.7	41842.1	41842.1	41842.1	41842.1	41843	41973.4	43157.4	730.3	42788.9	42263.5	38604.4	38604.4	38604.4	38604.4	39343.5	38855.3	41273.5	733.8	56397	56108.4	53195.1	53237.9	53331.3	53195.1	53195.1	53216.6	53346.4	53195.1	55756.3	735.4	33187	33686.8	32496.8	32503.2	32517
734.1	41168.7	40777.9	39496.9	39496.9	39496.9	39497	39496.9	39504.3	39508.9	39395.1	40860.2	735.3	43316.2	43331.1	41810.1	41810.1	41810.1	41810.1	41811.1	41943	43197.1	730.2	41523.8	42235.4	38546.2	38546.2	38546.3	38546.2	39351.8	38801	41175	733.7	55888.7	56177.1	53195.3	53238.6	53334.4	53195.3	53195.3	53217	53356.4	53195.4	55812	735.3	33426.4	33726.1	32490.9	32497.4	32511.4
734	41366.1	40811.4	39477.7	39477.7	39477.7	39477.8	39477.7	39485.2	39491.5	39375.8	40891.9	735.2	43815.8	43372	41775.8	41775.8	41775.8	41775.8	41777.1	41910.2	43236.3	730.1	41890.6	42215	38494.7	38494.7	38494.8	38494.7	39371.5	38753.5	41079.4	733.6	56227.6	56249	53201.9	53245.5	53343.8	53201.9	53201.9	53223.8	53373.6	53202	55869.9	735.2	33786.2	33765	32482.9	32489.5	32503.8
733.9	40721.4	40842.1	39456.2	39456.2	39456.2	39456.3	39456.2	39463.7	39471.9	39354.1	40920.7	735.1	42499.3	43411.4	41738.3	41738.3	41738.3	41738.3	41739.8	41874.3	43274	730	41612.6	42193.8	38440.9	38440.9	38441	38440.9	39393.6	38703.8	40978.2	733.5	56399.1	56313.3	53204.4	53248.3	53349.1	53204.4	53204.4	53226.5	53387.6	53204.4	55919.2	735.1	33472.5	33802.6	32471.8	32478.4	32493.1
733.8	40545.7	40879.2	39441.5	39441.5	39441.5	39441.7	39441.5	39449.1	39459.5	39339.4	40955.7	735	43952.9	43460.3	41708.6	41708.6	41708.6	41708.6	41710.4	41846.2	43321	729.9	42435.2	42175.6	38388.4	38388.4	38388.5	38388.4	39421.8	38655.5	40874.9	733.4	56493.1	56372	53204.7	53249.1	53352.5	53204.7	53204.7	53227	53400.6	53204.8	55961.6	735	34526.9	33844.5	32463.3	32469.9	32484.9
733.7	41005	40917.5	39428.7	39428.7	39428.7	39428.9	39428.7	39436.4	39449.2	39326.5	40991.5	734.9	43985.8	43501.5	41669.8	41669.8	41669.8	41669.8	41671.9	41809	43360.2	729.8	42478.2	42154.8	38330.9	38330.9	38331.1	38330.9	39450.4	38602.4	40763.8	733.3	56481.8	56425.9	53203.9	53248.7	53354.8	53203.9	53203.9	53226.4	53413.6	53204	55997.9	734.9	34984.6	33879.1	32445.7	32452.4	32467.7
733.6	41504.4	40949.7	39410.6	39410.6	39410.6	39410.8	39410.6	39418.4	39433.9	39308.3	41020.9	734.8	43604.9	43543.6	41630.6	41630.6	41630.6	41630.6	41633.1	41771.4	43400.3	729.7	41932.7	42136.1	38273	38273	38273.2	38273	39483.5	38548.9	40649.4	733.2	56508.7	56476	53203.3	53248.4	53357.3	53203.3	53203.3	53226	53428	53203.4	56029.2	734.8	34168.1	33911.5	32424	32430.8	32446.4
733.5	41454.1	40975.1	39386.8	39386.8	39386.8	39387	39386.8	39394.6	39413.2	39284.3	41043.1	734.7	44285	43588.9	41593.5	41593.5	41593.5	41593.5	41596.4	41735.9	43443.5	729.6	42781.3	42123	38217.7	38217.7	38218	38217.7	39524.8	38498.2	40535.1	733.1	56445	56521.9	53202.2	53247.8	53359.6	53202.2	53202.2	53225.2	53443.3	53202.4	56054.8	734.7	34223.4	33952.3	32409.1	32415.9	32431.9
733.4	41360	40999.7	39363.2	39363.2	39363.2	39363.4	39363.2	39371.1	39393.2	39260.7	41064.2	734.6	44086.1	43630.8	41551.9	41551.9	41551.9	41551.9	41555.4	41696.1	43483.2	729.5	42435.5	42108.2	38157.4	38157.4	38157.8	38157.4	39566.4	38442.6	40413.7	733	56667.8	56564.7	53202	53248	53362.8	53202	53202	53225.2	53461	53202.2	56075.7	734.6	33739.9	33994.2	32393.7	32400.5	32416.9
733.3	41329.6	41023.7	39340.4	39340.4	39340.4	39340.7	39340.4	39348.4	39374.4	39237.8	41084.3	734.5	43837	43674.4	41511.3	41511.3	41511.3	41511.3	41515.4	41657.2	43524.5	729.4	41713.9	42098.7	38098.7	38098.7	38099.2	38098.7	39615.1	38388.8	40291.8	732.9	56902.2	56600.7	53199	53245.4	53363.3	53199	53199	53222.4	53477.4	53199.2	56088.1	734.5	33902.6	34041.7	32382.2	32389.1	32405.8
733.2	40799.8	41046.4	39317.7	39317.7	39317.7	39318.1	39317.7	39325.8	39356.1	39215	41102.5	734.4	44628.3	43719.9	41472.1	41472.1	41472.1	41472.1	41476.8	41619.7	43567.5	729.3	41686.9	42097	38043.7	38043.7	38044.4	38043.7	39673.2	38338.8	40171.8	732.8	56457.8	56629.8	53193.1	53239.8	53361	53193.1	53193.1	53216.6	53492.5	53193.3	56091.8	734.4	33830.5	34089.1	32369.2	32376.2	32393.3
733.1	40512.9	41073.2	39300.7	39300.7	39300.7	39301.1	39300.7	39308.8	39344.1	39197.8	41124.4	734.3	43549.7	43760.6	41427.7	41427.7	41427.7	41427.7	41433.2	41577.1	43605.6	729.2	41935.6	42099.4	37988.5	37988.5	37989.4	37988.5	39736.6	38288.8	40050.2	732.7	56971.1	56660.5	53192.6	53239.7	53364.3	53192.6	53192.6	53216.3	53514.9	53192.8	56095.2	734.3	34553.1	34138.3	32356.7	32363.8	32381.3
733	40870.1	41101.3	39286.7	39286.7	39286.7	39287.1	39286.7	39294.8	39335.6	39183.7	41146.9	734.2	43588	43807.8	41389.6	41389.6	41389.6	41389.6	41396.1	41540.9	43650.1	729.1	42757.5	42104.9	37931.7	37931.7	37932.8	37931.7	39804.1	38237.2	39925.7	732.6	57014.2	56681.1	53185.7	53233.3	53361.3	53185.7	53185.7	53209.7	53532.9	53186	56086.4	734.2	34274.9	34182.4	32338	32345.1	32363
732.9	41465.1	41123.5	39268.5	39268.5	39268.5	39268.9	39268.5	39276.7	39323.6	39165.4	41162.8	734.1	44075.5	43854.6	41351.1	41351.1	41351.1	41351.1	41358.7	41504.2	43693.8	729	42103.8	42110.5	37869.9	37869.9	37871.5	37869.9	39872.4	38181	39795.4	732.5	56594.1	56697.5	53178.2	53226.2	53357.8	53178.2	53178.2	53202.4	53552.3	53178.5	56071.1	734.1	33592.2	34229.8	32321.5	32328.6	32347
732.8	41809.1	41136.9	39243.5	39243.5	39243.5	39244	39243.5	39251.8	39305.4	39140.3	41169.3	734	44532.2	43897.7	41309.3	41309.3	41309.3	41309.3	41318.2	41464.3	43733.8	728.9	41744.4	42124.5	37811.5	37811.5	37813.5	37811.5	39949.5	38128.2	39667.7	732.4	56120.5	56715.6	53175.8	53224.3	53359.6	53175.8	53175.8	53200.3	53579	53176.2	56055.2	734	34315.3	34283.5	32310.6	32317.8	32336.6
732.7	41656.8	41144.1	39214.4	39214.4	39214.4	39214.9	39214.4	39222.8	39283.9	39111.1	41169	733.9	44139.2	43937.2	41264.5	41264.5	41264.5	41264.5	41274.9	41421.5	43770	728.8	42285.1	42145.7	37754.7	37754.7	37757.4	37754.7	40033.9	38077.3	39541.1	732.3	56746	56736.3	53179.3	53228.2	53367.3	53179.3	53179.3	53204	53614	53179.7	56039.5	733.9	34263	34331.4	32293.5	32300.8	32320
732.6	41226.8	41150.7	39186.6	39186.6	39186.6	39187.2	39186.6	39195.1	39264.6	39083.2	41167.1	733.8	43723.7	43978.2	41221.9	41221.9	41221.9	41221.9	41233.9	41380.8	43807.3	728.7	42376.7	42169.1	37694.6	37694.6	37698.1	37694.6	40120.4	38023.2	39411.1	732.2	56345.8	56746.5	53175	53224.4	53367.5	53175	53175	53199.9	53643.7	53175.5	56010.5	733.8	33850.2	34379.8	32276.7	32284.1	32303.8
732.5	40925.7	41159.7	39163.4	39163.4	39163.4	39164.1	39163.4	39171.9	39250.7	39059.9	41166.6	733.7	44550.8	44020.3	41181.5	41181.5	41181.5	41181.5	41195.5	41342.4	43845.5	728.6	42229.3	42197.6	37633.7	37633.7	37638.2	37633.7	40211.5	37968.6	39280.2	732.1	55996.2	56759	53175.7	53225.5	53372.8	53175.7	53175.7	53200.8	53681	53176.3	55980.9	733.7	34567.8	34431.3	32263.3	32270.7	32290.9
732.4	40873.7	41169.6	39143.2	39143.2	39143.2	39144	39143.2	39151.8	39240.9	39039.6	41166.2	733.6	43903.4	44056	41135.8	41135.8	41135.8	41135.8	41152	41298.7	43876.9	728.5	41798.7	42232.4	37573.2	37573.2	37579.2	37573.2	40308.1	37914.6	39150.1	732	55899.8	56773.6	53180.7	53230.9	53382.5	53180.7	53180.7	53206.1	53725.5	53181.4	55950.5	733.6	34878	34476	32243.7	32251.1	32271.8
732.3	41047.8	41177.7	39123.4	39123.4	39123.4	39124.3	39123.4	39132.1	39232.4	39019.7	41162.8	733.5	44110.6	44093.8	41093.8	41093.8	41093.8	41093.8	41112.5	41258.8	43910.1	728.4	42576.4	42275.2	37514.8	37514.8	37522.5	37514.8	40411.7	37862.9	39022.6	731.9	55999.2	56787.6	53186.9	53237.7	53393.7	53186.9	53186.9	53212.6	53774.2	53187.7	55916.3	733.5	34770.8	34516.8	32221.2	32228.7	32249.9
732.2	41114.9	41181.5	39101.4	39101.4	39101.4	39102.4	39101.4	39110.2	39223	38997.6	41154	733.4	44262.2	44128.4	41050.2	41050.2	41050.2	41050.2	41071.8	41217.3	43939.7	728.3	42180.9	42319.6	37451.8	37451.8	37461.6	37451.8	40515.4	37806.9	38890.9	731.8	56370.9	56799.1	53192.1	53243.3	53403.9	53192.1	53192.1	53218	53825	53193	55876.2	733.4	34719.7	34556.9	32199.4	32207	32228.7
732.1	41036.7	41182.1	39078.5	39078.5	39078.5	39079.5	39078.5	39087.3	39213.8	38974.6	41140.8	733.3	44212.5	44159.9	41005.5	41005.5	41005.5	41005.5	41030.4	41174.7	43965.7	728.2	42548.7	42371.9	37390.6	37390.6	37403.1	37390.6	40625.4	37752.9	38762.1	731.7	56797	56804.9	53192.6	53244.3	53409.8	53192.6	53192.6	53218.8	53874.5	53193.6	55826.9	733.3	34464.2	34595.1	32177.9	32185.6	32207.8
732	40918.3	41181.4	39056.1	39056.1	39056.1	39057.3	39056.1	39065.1	39206.6	38952.1	41124.8	733.2	44018.1	44189.2	40960.8	40960.8	40960.8	40960.8	40989.4	41132.2	43989.1	728.1	42467.1	42427.9	37327	37327	37342.9	37327	40737.3	37696.9	38631.9	731.6	56808.5	56805	53187.9	53240.1	53410.6	53187.9	53187.9	53214.3	53922.2	53189.1	55768.1	733.2	34823.3	34632.8	32158.4	32166.2	32188.9
731.9	40990.1	41179.6	39034.8	39034.8	39034.8	39036.2	39034.8	39043.9	39201.9	38930.8	41106.3	733.1	44488.7	44217.1	40917	40917	40917	40917	40949.9	41090.6	44010.6	728	42683.5	42490.2	37263.5	37263.5	37283.6	37263.5	40852.9	37641.2	38502.9	731.5	56437.9	56804.8	53183	53235.7	53411.4	53183	53183	53209.7	53973.4	53184.3	55705.2	733.1	34573	34664.2	32135.7	32143.5	32166.8
731.8	40961.8	41175	39012.5	39012.5	39012.5	39014	39012.5	39021.6	39197.8	38908.3	41083.4	733	43843.6	44239.3	40870.1	40870.1	40870.1	40870.1	40907.8	41046	44025.7	727.9	42770.2	42556.8	37198.5	37198.5	37223.8	37198.5	40970.3	37584.3	38373.8	731.4	56932.9	56809.6	53182.6	53235.8	53416.9	53182.6	53182.6	53209.5	54033	53184.1	55643.2	733	34195.3	34693.7	32114.9	32122.8	32146.7
731.7	40981.8	41168.7	38990.3	38990.3	38990.3	38991.9	38990.3	38999.5	39195.3	38886	41057.1	732.9	44463.8	44262.5	40826.8	40826.8	40826.8	40826.8	40870	41005	44041	727.8	42967.3	42628.7	37132.6	37132.6	37164.3	37132.6	41090	37526.9	38245.3	731.3	56768.4	56809.2	53176.1	53229.7	53416.6	53176.1	53176.1	53203.3	54090.4	53177.8	55571.6	732.9	35397.2	34722.2	32097.2	32105.1	32129.7
731.6	40775.5	41160.2	38967.6	38967.6	38967.6	38969.4	38967.6	38976.9	39194.2	38863.2	41026.8	732.8	44246.9	44278.7	40779.4	40779.4	40779.4	40779.4	40828.8	40960	44048.7	727.7	42562.3	42705	37065.3	37065.3	37104.8	37065.3	41210.7	37468.4	38117	731.2	56994	56812.3	53171.5	53225.7	53418.4	53171.5	53171.5	53199	54154	53173.5	55499.1	732.8	34490.7	34735.5	32069	32077	32102.2
731.5	40922.9	41152.3	38946.9	38946.9	38946.9	38948.9	38946.9	38956.3	39197.1	38842.4	40995.2	732.7	44090.5	44292.9	40733.1	40733.1	40733.1	40733.1	40789.5	40916.1	44053.6	727.6	42977.4	42789	36999.9	36999.9	37048.8	36999.9	41335.3	37412.2	37992.2	731.1	56585.4	56814.6	53164.1	53218.8	53417.7	53164.1	53164.1	53191.8	54219.2	53166.3	55421.2	732.7	34787.2	34751.1	32048.4	32056.4	32082.3
731.4	40780.4	41141.2	38924.3	38924.3	38924.3	38926.6	38924.3	38933.8	39200.1	38819.8	40958.3	732.6	44253.7	44304.8	40687.5	40687.5	40687.5	40687.5	40751.7	40872.9	44055.1	727.5	42889.6	42875.9	36931.8	36931.8	36992.2	36931.8	41458.7	37353.6	37866.6	731	56652.6	56824.5	53161.6	53216.9	53422.1	53161.6	53161.6	53189.7	54293.8	53164.2	55345.9	732.6	34877.8	34758.4	32025	32033.2	32059.7
731.3	41027.7	41130.4	38903.2	38903.2	38903.2	38905.6	38903.2	38912.7	39206.7	38798.5	40919.5	732.5	43465.6	44312	40640.6	40640.6	40640.6	40640.6	40713.6	40828.5	44051	727.4	42755.6	42968.5	36863.8	36863.8	36938	36863.8	41583.1	37295.6	37743	730.9	57095.3	56836.6	53158.3	53214.1	53426	53158.3	53158.3	53186.6	54372.2	53161.2	55267.9	732.5	34873.9	34758.9	32000.7	32008.9	32036.1
731.2	41120.5	41115.8	38878.9	38878.9	38878.9	38881.7	38878.9	38888.6	39212.6	38774.2	40874.5	732.4	43666.3	44320.5	40598.2	40598.2	40598.2	40598.2	40681.1	40788.7	44047	727.3	43039.5	43067.1	36796.1	36796.1	36886.9	36796.1	41708.4	37238.4	37621.7	730.8	56707.1	56846.9	53149.4	53205.8	53424.7	53149.4	53149.4	53178.1	54449.9	53152.7	55182.9	732.4	35429.8	34753.2	31976.2	31984.5	32012.4
731.1	40821	41099.2	38853.4	38853.4	38853.4	38856.5	38853.4	38863.2	39219.6	38748.6	40825.1	732.3	44233.2	44324.1	40554.3	40554.3	40554.3	40554.3	40648.3	40747.5	44037	727.2	43514.8	43168.9	36726.5	36726.5	36836.9	36726.5	41831.3	37179.7	37500.5	730.7	57168.9	56866	53145.3	53202.2	53428.4	53145.3	53145.3	53174.2	54537.3	53149	55101.4	732.3	34534.4	34736.2	31946.7	31955.1	31983.8
731	40764.1	41085.3	38831	38831	38831	38834.3	38831	38840.8	39232.3	38726	40775.8	732.2	44346.6	44320.6	40506.7	40506.7	40506.7	40506.7	40613.1	40702.6	44018.5	727.1	42865.6	43273.1	36653.9	36653.9	36787.6	36653.9	41950.5	37118.5	37378.2	730.6	57205.4	56884.1	53135.4	53192.8	53426.7	53135.4	53135.4	53164.6	54624.1	53139.6	55013.2	732.2	34055.4	34720.5	31924.6	31933.1	31962.6
730.9	40988.2	41071.8	38808.9	38808.9	38808.9	38812.6	38808.9	38818.9	39248.1	38703.9	40724	732.1	43674.1	44312.8	40458.1	40458.1	40458.1	40458.1	40578.3	40656.7	43994.1	727	43510.1	43385.6	36584.5	36584.5	36745.7	36584.5	42071.2	37061	37261.3	730.5	56964.1	56906.8	53124.9	53182.9	53424.7	53124.9	53124.9	53154.4	54715.5	53129.6	54924	732.1	34378.1	34702.6	31906.5	31915	31945.3
730.8	41326.7	41055.7	38784.1	38784.1	38784.1	38788.2	38784.1	38794.2	39264.1	38679	40666.7	732	45054.4	44305.3	40413.4	40413.4	40413.4	40413.4	40548.8	40614.7	43968.6	726.9	43198.3	43499.2	36511.2	36511.2	36704.4	36511.2	42185.7	37000.1	37142.4	730.4	56866.8	56938	53117.2	53175.9	53426	53117.2	53117.2	53147.1	54815.2	53122.6	54837.5	732	34804.6	34676	31885.4	31894	31925.2
730.7	40945	41036.1	38755.2	38755.2	38755.2	38759.8	38755.2	38765.4	39279	38650	40602.8	731.9	44084	44285.9	40359.8	40359.8	40359.8	40359.8	40512.4	40564	43929.2	726.8	43181.9	43619.4	36439.1	36439.1	36669.9	36439.1	42298.7	36941.2	37027	730.3	57121.5	56976.5	53110.7	53169.9	53428.9	53110.7	53110.7	53140.9	54921.4	53116.7	54752.3	731.9	34614.3	34640.2	31860.5	31869.1	31901.2
730.6	41051.1	41021.2	38730.3	38730.3	38730.3	38735.3	38730.3	38740.6	39301	38625	40540.5	731.8	44023.6	44268.9	40311.9	40311.9	40311.9	40311.9	40483.4	40519	43890.4	726.7	43629.7	43744.2	36366.8	36366.8	36640.9	36366.8	42407.7	36882.5	36913.3	730.2	57318.1	57018.3	53101	53160.8	53428.9	53101	53101	53131.4	55030	53107.7	54664.3	731.8	34514.9	34600.8	31837	31845.7	31878.7
730.5	41457.7	41006	38703.9	38703.9	38703.9	38709.4	38703.9	38714.3	39324.9	38598.5	40474.5	731.7	43746.3	44248.9	40264.1	40264.1	40264.1	40264.1	40456.5	40474.1	43846.5	726.6	43830.5	43871.2	36291.5	36291.5	36615.7	36291.5	42509.7	36821.6	36798.9	730.1	57382.8	57064.5	53088.6	53149	53426.8	53088.6	53088.6	53119.4	55141.7	53096.2	54574.4	731.7	34936.4	34557.6	31814.1	31823	31856.9
730.4	40855.9	40987.4	38672.7	38672.7	38672.7	38678.8	38672.7	38683.2	39347.4	38567.2	40401.7	731.6	44475.9	44227.4	40217.7	40217.7	40217.7	40217.7	40433.3	40430.8	43798.9	726.5	43033.6	44001.7	36214.8	36214.8	36596.3	36214.8	42605	36759.8	36684.9	730	57712	57117	53075.4	53136.4	53424.4	53075.4	53075.4	53106.5	55258.1	53083.8	54484.7	731.6	34274.3	34506.9	31787.5	31796.4	31831.4
730.3	40658	40977.1	38647.8	38647.8	38647.8	38654.6	38647.8	38658.4	39379.9	38542.2	40333.3	731.5	44523.4	44198.4	40166.6	40166.6	40166.6	40166.6	40407.6	40382.7	43741.3	726.4	43719.1	44141.2	36142	36142	36588.9	36142	42698.6	36702.8	36577	729.9	57525.9	57173	53057.8	53119.5	53418.2	53057.8	53057.8	53089.3	55375.9	53067.3	54391.9	731.5	33719.4	34458.4	31766.3	31775.3	31811.3
730.2	41193	40970.8	38624.9	38624.9	38624.9	38632.3	38624.9	38635.6	39418.1	38519.2	40265.2	731.4	44209.3	44166.4	40114.8	40114.8	40114.8	40114.8	40383.9	40334.1	43678	726.3	44656.6	44281.8	36065	36065	36586	36065	42781.8	36642.3	36466.8	729.8	57651.3	57239	53042.4	53104.7	53414.7	53042.4	53042.4	53074.2	55501.6	53053	54302.8	731.4	34135.7	34412.2	31749.6	31758.7	31795.8
730.1	41210.8	40960.7	38595.8	38595.8	38595.8	38603.9	38595.8	38606.6	39453.9	38490	40189.4	731.3	44399.2	44133.7	40064.6	40064.6	40064.6	40064.6	40364.6	40287.1	43611.2	726.2	45038.1	44421.7	35982.4	35982.4	36586.9	35982.4	42852.1	36577.1	36352.9	729.7	57468.9	57311.5	53025.2	53088.1	53410.2	53025.2	53025.2	53057.4	55631.3	53037.1	54213.5	731.3	34573	34360.5	31729.3	31738.5	31776.6
730	41220.4	40952.9	38566.1	38566.1	38566.1	38575	38566.1	38577	39493.1	38460.2	40111.8	731.2	44296.2	44097.5	40013	40013	40013	40013	40346.8	40238.8	43537.9	726.1	44721.4	44564.2	35897.3	35897.3	36595.3	35897.3	42912.4	36510.1	36238.3	729.6	57616.2	57394.6	53010.1	53073.7	53408.4	53010.1	53010.1	53042.6	55768.8	53023.4	54128.2	731.2	34893.8	34304	31705	31714.3	31753.6
729.9	41109.5	40947.7	38536	38536	38536	38545.8	38536	38547	39536	38430	40032.7	731.1	43325.5	44060	39961.7	39961.7	39961.7	39961.7	40332.4	40190.8	43460	726	44665.6	44712.9	35813.4	35813.4	36615.6	35813.4	42965.4	36445.2	36126.8	729.5	57269.4	57484.3	52992.9	53057.2	53405.5	52992.9	52992.9	53025.8	55909.8	53007.8	54042.9	731.1	34192.4	34244.4	31677.8	31687.2	31727.7
729.8	40987.2	40946.9	38506.8	38506.8	38506.8	38517.5	38506.8	38517.9	39584.1	38400.8	39953.7	731	44616.7	44026.8	39916	39916	39916	39916	40327.2	40148.6	43383	725.9	44698.5	44866.5	35729.4	35729.4	36646.9	35729.4	43009.5	36381.2	36017	729.4	57743.2	57586.9	52979.9	53044.8	53407.6	52979.9	52979.9	53013.1	56060.4	52996.5	53963.9	731	33961.2	34191	31656.4	31665.8	31707.6
729.7	40992	40950.8	38478.6	38478.6	38478.7	38490.4	38478.6	38489.8	39637.4	38372.5	39874.9	730.9	43709.7	43984.5	39862.1	39862.1	39862.1	39862.1	40317.4	40098.2	43293.1	725.8	45391	45024.3	35644.7	35644.7	36689.3	35644.7	43043.4	36317.5	35908.1	729.3	57721.6	57692.5	52960.8	53026.4	53404.6	52960.8	52960.8	52994.4	56210.6	52979.3	53881.1	730.9	33756.4	34140.6	31636.7	31646.2	31689.3
729.6	41048.7	40958.3	38450	38450	38450.2	38462.9	38450	38461.4	39694.8	38343.9	39795.3	730.8	43753	43946.8	39813.4	39813.4	39813.4	39813.4	40316.7	40053.2	43203.8	725.7	44678.2	45182.3	35555.7	35555.7	36739.3	35555.7	43062.9	36250.5	35796.7	729.2	57991.6	57807.2	52941.7	53008	53402.9	52941.7	52941.7	52975.7	56366.1	52962.3	53800.8	730.8	33031.7	34093.6	31618.6	31628.2	31672.7
729.5	41272.3	40969.1	38420.6	38420.6	38420.7	38434.7	38420.6	38432	39755.6	38314.3	39714.5	730.7	43113	43908.4	39764.2	39764.2	39764.2	39764.2	40319.5	40007.7	43109.7	725.6	44785.1	45348.1	35470.2	35470.2	36804.9	35470.2	43075.4	36188.1	35690.2	729.1	57999	57927.5	52919.1	52986.1	53398.9	52919.1	52919.1	52953.4	56523.2	52942	53719.3	730.7	33104	34055.2	31606.6	31616.3	31662.2
729.4	41264.2	40981.6	38388.2	38388.2	38388.5	38403.7	38388.2	38399.8	39818.2	38281.9	39630.7	730.6	43780.6	43874	39718.7	39718.7	39718.7	39718.7	40330.4	39965.9	43015	725.5	45703.2	45516.5	35383.6	35383.6	36881.5	35383.6	43075.9	36125.7	35584.1	729	58104.3	58056.6	52896	52963.7	53395.9	52896	52896	52930.8	56684.8	52921.5	53640	730.6	34715.4	34019.1	31593.8	31603.6	31651
729.3	41167.4	40998.6	38355.7	38355.7	38356	38372.5	38355.7	38367.4	39885	38249.2	39546.7	730.5	43488.5	43835.8	39668.7	39668.7	39668.7	39668.7	40341.4	39919.8	42912	725.4	45320.4	45682.5	35291.4	35291.4	36964.6	35291.4	43059.3	36058.9	35473.9	728.9	58344.5	58193.4	52871.4	52939.8	53393.1	52871.4	52871.4	52906.5	56849.5	52899.7	53561.7	730.5	34235.2	33972.7	31567.2	31577.1	31626
729.2	41085.1	41021.2	38323.8	38323.8	38324.2	38342.2	38323.8	38335.6	39957.1	38217.3	39463.6	730.4	43011	43800.4	39620.2	39620.2	39620.2	39620.2	40358.8	39875.3	42806.8	725.3	45689.8	45852.8	35200.8	35200.8	37061	35200.8	43032.7	35995	35366.7	728.8	58207.4	58336.2	52843.5	52912.7	53388.9	52843.5	52843.5	52879	57015.6	52874.8	53482.6	730.4	34700.1	33934.3	31544.4	31554.4	31605
729.1	41089.2	41049.5	38292.5	38292.5	38293.1	38312.6	38292.5	38304.5	40034.4	38185.9	39381.4	730.3	43480.5	43769.3	39574.4	39574.4	39574.4	39574.4	40383.9	39833.5	42700.6	725.2	46379.7	46022	35107.8	35107.8	37165.8	35107.8	42991.5	35929.8	35258.2	728.7	58499.6	58489.7	52816.9	52886.9	53388.3	52816.9	52816.9	52852.9	57187	52851.7	53407.6	730.3	34837.9	33896.4	31517.5	31527.6	31579.9
729	41064.2	41082.7	38260.8	38260.8	38261.6	38282.7	38260.8	38272.9	40115.7	38154.1	39299.4	730.2	43944.7	43737.1	39525.4	39525.4	39525.4	39525.4	40411.2	39788.7	42588	725.1	47276.5	46187.6	35010.3	35010.3	37276.8	35010.3	42933.6	35861.6	35146.5	728.6	58680.7	58648.5	52786.4	52857.2	53386.2	52786.4	52786.4	52822.8	57358.5	52824.9	53331.1	730.2	34053.8	33862.2	31489.2	31499.4	31553.5
728.9	41140.8	41121.2	38229	38229	38230.2	38252.9	38229	38241.2	40201.5	38122.2	39218	730.1	44319.3	43704.5	39473.2	39473.2	39473.2	39473.2	40440.9	39740.8	42469.2	725	46565.2	46346.9	34907.4	34907.4	37391.3	34907.4	42857.8	35789.4	35030.5	728.5	58338.4	58814	52753.3	52824.8	53384.4	52753.3	52753.3	52790.1	57530.8	52795.8	53254.6	730.1	34216.2	33839.9	31467.3	31477.6	31533.5
728.8	41453.8	41164	38196	38196	38197.6	38222.1	38196	38208.4	40290.6	38089.2	39136.1	730	44254.2	43672.3	39418.4	39418.4	39418.4	39418.4	40473.7	39690.4	42345	724.9	46965.2	46507.4	34807.8	34807.8	37517.2	34807.8	42772.7	35721.9	34918.9	728.4	58840.3	58992.7	52724	52796.3	53389.6	52724	52724	52761.2	57710	52771	53184.5	730	34169.3	33822	31443.8	31454.3	31512.2
728.7	41480.5	41208.5	38159.2	38159.2	38161.3	38187.5	38159.2	38171.7	40380.1	38052.3	39051.3	729.9	44118.3	43643.8	39363.7	39363.7	39363.7	39363.7	40512.6	39640.2	42218.4	724.8	46646.2	46661.6	34705.4	34705.4	37647	34705.4	42672.2	35653.2	34805.6	728.3	59417.5	59174.3	52688.1	52761.2	53392.1	52688.1	52688.1	52725.8	57885.6	52740	53110.3	729.9	33136.4	33810.5	31420.6	31431.1	31491.1
728.6	41348.6	41258	38121.6	38121.6	38124.5	38152.5	38121.6	38134.3	40473.2	38014.6	38966.8	729.8	43558.2	43619.9	39309.5	39309.5	39309.5	39309.5	40558.3	39590.6	42089.9	724.7	47737.4	46811.5	34604.3	34604.3	37782.5	34604.3	42560.2	35587.2	34694.4	728.2	59393	59357.6	52644.6	52718.5	53391.2	52644.6	52644.6	52682.7	58055.6	52701.8	53030.8	729.8	33639.6	33814.2	31406	31416.6	31478.7
728.5	41299.1	41314.1	38085.1	38085.1	38089	38118.7	38085.1	38097.9	40571.4	37978.1	38884.6	729.7	43574.3	43603.7	39258.4	39258.4	39258.4	39258.4	40613.4	39544.3	41962.7	724.6	46933.5	46947.5	34496.6	34496.6	37914.4	34496.6	42429	35516.3	34577.5	728.1	59513.2	59550.4	52600.9	52675.6	53395	52600.9	52600.9	52639.4	58227.4	52663.9	52953.5	729.7	33563.1	33820.4	31386.9	31397.6	31462
728.4	41318.1	41376.1	38048.7	38048.7	38053.9	38085.2	38048.7	38061.7	40673.7	37941.6	38803.6	729.6	43745.8	43592.1	39206.8	39206.8	39206.9	39206.8	40674.8	39497.7	41833.3	724.5	46831.5	47077.9	34392.7	34392.7	38050.6	34392.7	42289.1	35450.9	34465.2	728	59438	59750.7	52555.1	52630.7	53402.3	52555.1	52555.1	52594.2	58398.3	52624.5	52876.4	729.6	34037.7	33834.4	31368.3	31379.2	31446
728.3	41118.7	41443.1	38011.8	38011.8	38018.5	38051.3	38011.8	38024.9	40779.3	37904.6	38723.3	729.5	44193.9	43584.5	39153.9	39153.9	39154	39153.9	40741.4	39449.8	41701.1	724.4	46860.3	47196.8	34288.8	34288.8	38185.2	34288.8	42136.9	35387.2	34353.7	727.9	59360.8	59961.1	52509.7	52586.2	53416.2	52509.7	52509.8	52549.2	58570.4	52586	52801.9	729.5	34386.1	33851.6	31345.6	31356.5	31425.8
728.2	41302.2	41517.4	37976.6	37976.6	37985.5	38019.5	37976.6	37989.9	40890.1	37869.3	38646.2	729.4	44488.1	43579.7	39098	39098	39098	39098	40811.9	39399	41564.7	724.3	47162	47301.3	34184.1	34184.1	38315	34184.1	41971.8	35324.7	34242.2	727.8	60004	60182.2	52464.7	52542.1	53437.5	52464.7	52464.7	52504.7	58743.2	52548.5	52729.9	729.4	34585.5	33873.4	31319.7	31330.7	31402.6
728.1	41634.4	41595	37939	37939	37950.6	37985.5	37939	37952.4	41001.8	37831.7	38568.1	729.3	43884.1	43579	39039.8	39039.8	39039.9	39039.8	40887.2	39346.3	41425.1	724.2	47566.6	47387.4	34077.2	34077.2	38435.8	34077.2	41792.7	35261.6	34129.1	727.7	60319.5	60404.8	52411.2	52489.4	53458.3	52411.2	52411.2	52451.6	58907	52503.1	52651.4	729.3	34447	33901.3	31291.8	31303	31377.6
728	41759.1	41673.8	37897.3	37897.3	37912.2	37947.6	37897.3	37910.8	41112.3	37789.9	38487.3	729.2	43133.6	43588.2	38985.1	38985.1	38985.2	38985.1	40972.8	39297	41288.3	724.1	46631.6	47452.6	33967.5	33967.5	38544.7	33967.5	41599.1	35197.7	34013.7	727.6	60795.4	60633.7	52353.1	52432.2	53483.4	52353.1	52353.1	52394	59065.5	52453.8	52570.2	729.2	34695.7	33938.3	31264.9	31276.2	31353.8
727.9	42003.2	41756.2	37853.7	37853.7	37872.9	37908.1	37853.7	37867.4	41223.8	37746.2	38406.2	729.1	43810.4	43608.6	38934.6	38934.6	38934.8	38934.6	41069.9	39252.2	41155.4	724	47740.6	47501.9	33862.4	33862.4	38646.2	33862.4	41399.1	35140.2	33903.4	727.5	60959	60866.6	52288.3	52368.4	53511.6	52288.3	52288.3	52329.8	59215.7	52398.6	52484.2	729.1	34501.9	33981.3	31235.6	31247	31327.7
727.8	41829.2	41840.8	37806.9	37806.9	37831.6	37865.8	37806.9	37820.8	41334.5	37699.3	38323.3	729	43725.8	43631.7	38879.6	38879.6	38879.9	38879.6	41169.6	39203.1	41017.9	723.9	47552.3	47521.9	33750.5	33750.5	38726.7	33750.5	41181.8	35078.1	33786.9	727.4	61597.2	61108	52220.8	52301.7	53548	52220.8	52220.8	52262.7	59360.8	52341.4	52397.1	729	34785.4	34034.2	31207.8	31219.3	31303.2
727.7	41568.1	41932	37761.5	37761.5	37792.9	37825.1	37761.5	37775.6	41448.6	37653.9	38243.4	728.9	44123	43662.3	38824.8	38824.8	38825.2	38824.8	41276.4	39154.4	40880.7	723.8	48479.5	47517.9	33639.1	33639.1	38790.8	33639.1	40954.5	35018.4	33671.3	727.3	61697.5	61352.6	52144.4	52226.4	53587.7	52144.4	52144.4	52186.9	59494.5	52276.3	52302.8	728.9	34157.8	34093	31177.2	31188.9	31276.3
727.6	42013.1	42030.9	37718.5	37718.5	37758.3	37787.2	37718.5	37732.8	41566.9	37610.9	38167.5	728.8	44915.9	43697.8	38767.3	38767.3	38767.8	38767.3	41387.7	39103.1	40741	723.7	46995.2	47482	33521.8	33521.8	38830.1	33521.8	40712	34955	33550.4	727.2	61647.7	61606.8	52065.9	52148.8	53638.3	52065.9	52065.9	52108.9	59622.5	52209.8	52207.9	728.8	34576.9	34165.7	31151.8	31163.6	31254.6
727.5	42169.3	42129.4	37670.1	37670.1	37720.2	37744.2	37670.1	37684.5	41680.9	37562.4	38087.7	728.7	43896.9	43735.8	38704.5	38704.5	38705.3	38704.5	41500.5	39046.7	40596.7	723.6	46803	47425.9	33412.2	33412.2	38855.9	33412.2	40467.8	34901.4	33437.5	727.1	61307.5	61873.6	51987	52070.9	53702.9	51987	51987	52030.6	59746	52144	52114.1	728.7	35195.7	34243.3	31122.6	31134.5	31229.4
727.4	41906.5	42230.7	37619.4	37619.4	37682.2	37699.3	37619.4	37634	41793.5	37511.6	38007.2	728.6	44276.6	43787.6	38647.6	38647.6	38648.7	38647.6	41626.1	38996.5	40458.9	723.5	48007.5	47341.3	33303	33303	38859	33303	40215.7	34850.3	33325.3	727	62513.4	62156.3	51911.4	51996.3	53786.2	51911.4	51911.4	51955.5	59867.9	52082.5	52024.9	728.6	34424.2	34324.2	31087.8	31099.9	31198.9
727.3	41947.8	42339.6	37571.1	37571.1	37649.3	37657.2	37571.1	37585.9	41909	37463.2	37930.5	728.5	44048.2	43844.5	38588	38588	38589.5	38588	41755.5	38943.9	40319.5	723.4	46917.6	47219.5	33186.6	33186.6	38830.4	33186.6	39948.4	34794.2	33206.2	726.9	62585.4	62436.6	51819.8	51905.8	53870.1	51819.8	51819.8	51864.5	59968.3	52006.1	51921	728.5	34117.6	34420	31059.4	31071.6	31174.9
727.2	42176.4	42452.5	37521.8	37521.8	37618.6	37614.4	37521.8	37536.7	42023.4	37413.8	37854.4	728.4	43323.8	43910.3	38529.4	38529.4	38531.5	38529.4	41892.3	38892.5	40182.2	723.3	47067	47072.6	33075.5	33075.5	38781.4	33075.5	39679.2	34745.8	33092.8	726.8	62739.8	62729	51726.3	51813.2	53969.7	51726.3	51726.3	51771.5	60060.7	51928.8	51816.3	728.4	34840.2	34526.9	31033.3	31045.6	31153.5
727.1	42305.8	42567.6	37469.3	37469.3	37588.7	37569.1	37469.3	37484.5	42134.2	37361.3	37776.6	728.3	44521.5	43988.1	38474.9	38474.9	38477.8	38474.9	42039.3	38845.5	40050.3	723.2	46577.2	46893.6	32963	32963	38704.3	32963	39402.1	34698.2	32978.2	726.7	62911.2	63032.1	51629.6	51717.7	54084.8	51629.6	51629.6	51675.4	60143.1	51849.7	51709.5	728.3	34807.4	34636	31000.8	31013.3	31126.1
727	42366.3	42685.9	37414.9	37414.9	37561.1	37522.1	37414.9	37430.2	42241.9	37306.8	37698.3	728.2	43354.3	44065.8	38412.8	38412.8	38416.6	38412.8	42184.3	38791.1	39912.2	723.1	46627.8	46686.2	32852.6	32852.6	38602.1	32852.6	39121.1	34655	32865.9	726.6	63259.6	63346.5	51529.6	51618.8	54216.3	51529.6	51529.6	51576.1	60214.7	51768.5	51600.4	728.2	34633.3	34753.4	30968.4	30980.9	31099
726.9	42740.4	42808.3	37359.2	37359.2	37537.3	37474.3	37359.2	37374.6	42346.7	37251	37620.1	728.1	44232.6	44158	38357.4	38357.4	38362.5	38357.4	42341.5	38743.8	39782.4	723	46191.5	46448.1	32741.3	32741.3	38471.8	32741.3	38834.1	34613.2	32752.9	726.5	63485.1	63669.6	51424.1	51514.3	54362.3	51424.1	51424.1	51471.2	60272.5	51683.1	51486.7	728.1	35760	34880.3	30937.1	30949.8	31073.5
726.8	43270.9	42931.7	37298.6	37298.6	37514.5	37422.2	37298.6	37314.3	42444.8	37190.4	37538.4	728	44390	44251.7	38296.3	38296.3	38303.1	38296.3	42497.8	38691.1	39648.7	722.9	46113.8	46182.7	32631.8	32631.8	38316.3	32631.8	38544.4	34575.5	32641.9	726.4	64186.3	64002.9	51314.4	51405.8	54525.2	51314.4	51314.5	51362.1	60317.4	51595	51369.7	728	35933.5	35005.2	30896	30908.8	31038.4
726.7	43291.3	43054.2	37231.5	37231.5	37491.7	37364.1	37231.5	37247.4	42533.7	37123.2	37451.6	727.9	43851.5	44351.2	38233.8	38233.8	38242.8	38233.8	42657.1	38637.3	39515.5	722.8	45995.5	45889.5	32522.1	32522.1	38134.2	32522.1	38250.6	34540.1	32531	726.3	64599.9	64340.7	51194.8	51287.2	54699.5	51194.8	51194.8	51243.1	60342.9	51498.4	51243.4	727.9	35509	35135.9	30853	30866	31001.9
726.6	43228.3	43181.9	37163.4	37163.4	37475.2	37305.5	37163.4	37179.5	42618.6	37055.1	37365	727.8	43971.3	44460.6	38174.3	38174.3	38186.1	38174.3	42823.5	38586.9	39387.1	722.7	45811.5	45570.5	32412.5	32412.5	37927	32412.5	37953.9	34507	32420.2	726.2	64529.8	64685.4	51068.4	51162.1	54888.5	51068.4	51068.4	51117.4	60351.7	51396.7	51111.2	727.8	35626.6	35277.2	30813.3	30826.4	30969.1
726.5	43141.6	43315.9	37095.2	37095.2	37466.9	37247.4	37095.2	37111.5	42699.6	36986.8	37279.6	727.7	43850.9	44575.3	38113.7	38113.7	38129	38113.7	42991.9	38535.8	39259.7	722.6	45643.9	45227.9	32303.3	32303.3	37696.1	32303.3	37655	34476.7	32310	726.1	65659.9	65042.7	50941.4	51036.3	55098.3	50941.4	50941.4	50991	60349.3	51295.9	50978.9	727.7	35418.8	35424.1	30772.2	30785.5	30935.5
726.4	43421.8	43456.7	37027.2	37027.2	37467.9	37190.2	37027.2	37043.8	42776.7	36918.8	37195.6	727.6	43481.3	44696.7	38053.4	38053.4	38073.3	38053.4	43163.6	38485.4	39134.7	722.5	44791.8	44864.2	32194.4	32194.4	37443.2	32194.4	37354.9	34449.1	32200.2	726	66068.2	65396.3	50798.8	50894.9	55313.3	50798.8	50798.8	50849.1	60320.2	51181.3	50831.6	727.6	35768.5	35578.9	30732.6	30746	30903.8
726.3	43597.5	43600.7	36955.4	36955.4	37474.8	37129.7	36955.4	36972.1	42845.3	36846.9	37108.9	727.5	45030.2	44825.8	37995.1	37995.1	38020.7	37995.1	43339	38437.4	39013.9	722.4	44967.7	44485.7	32089.6	32089.6	37174.2	32089.6	37057.8	34427.9	32094.6	725.9	66027.9	65754.1	50649.3	50746.6	55541.6	50649.3	50649.3	50700.3	60272.6	51061.6	50678	727.5	35917.8	35736.2	30689.6	30703.2	30869.4
726.2	43774.5	43749	36880.8	36880.8	37489.8	37067.1	36880.8	36897.7	42905.8	36772.3	37020.5	727.4	45283.7	44950.5	37926.8	37926.8	37959.7	37926.8	43505.9	38379.9	38885.4	722.3	44427.9	44089.2	31983.3	31983.3	36885.3	31983.3	36758.6	34407.5	31987.6	725.8	65889.6	66120.3	50498.5	50597.1	55787.9	50498.5	50498.6	50550.2	60211.8	50942.5	50523.5	727.4	35618.7	35897.4	30645	30658.8	30833.9
726.1	43909.2	43902.2	36803.4	36803.4	37513.4	37002.3	36803.4	36820.5	42957.8	36694.8	36930.3	727.3	44856.5	45078.5	37856.6	37856.6	37898.5	37856.6	43671.6	38321	38757.2	722.2	43732.5	43682	31879.3	31879.3	36583.1	31879.4	36462	34391.7	31883.1	725.7	66656.7	66493.6	50347.6	50447.4	56051.4	50347.6	50347.6	50399.9	60138.2	50825.2	50369.3	727.3	35921.4	36065.7	30602.6	30616.5	30801.4
726	43857.6	44060.4	36723.6	36723.6	37546.8	36935.9	36723.6	36741	43001.1	36615	36838.7	727.2	44476	45213.3	37788.6	37788.6	37841.7	37788.6	43839.1	38264.8	38633.5	722.1	43013.7	43267.6	31778.7	31778.7	36270.7	31778.7	36169.4	34381.5	31781.9	725.6	67240.4	66861.1	50185.2	50286.4	56319.4	50185.2	50185.2	50238.3	60040.6	50698.5	50204.1	727.2	36518.8	36235.3	30557.2	30571.3	30766.7
725.9	44257.8	44226.1	36643.5	36643.5	37592.7	36870	36643.5	36661.1	43037.4	36534.8	36747.7	727.1	45079	45354.7	37722.5	37722.5	37789.4	37722.5	44007.7	38211.1	38513.9	722	42933.7	42849.6	31681.4	31681.4	35951	31681.5	35881.7	34376.9	31684.2	725.5	67523.9	67221.6	50013.6	50116.1	56591	50013.6	50013.6	50067.5	59920.5	50564.7	50030	727.1	36362.7	36403.1	30506.4	30520.6	30727.4
725.8	44574.8	44394.4	36558.1	36558.1	37646.6	36799.4	36558.1	36575.9	43061.3	36449.3	36652.2	727	45723.6	45496	37652.3	37652.3	37736.1	37652.3	44170.2	38153.9	38392.6	721.9	43136.2	42427.4	31584.1	31584.1	35623.1	31584.2	35595.8	34374.4	31586.5	725.4	67567.6	67576	49836.4	49940.2	56867.2	49836.4	49836.4	49891	59781.5	50427.5	49850.5	727	36038.1	36574.6	30456.4	30470.8	30690
725.7	44698.7	44565.5	36468.1	36468.1	37709.5	36725.1	36468.1	36486.2	43072.9	36359.3	36553.1	726.9	44790	45636.7	37577.7	37577.7	37682	37577.7	44325.6	38092.9	38269.2	721.8	42362.4	42002.3	31485.1	31485.1	35287.7	31485.2	35310.5	34372.3	31487.2	725.3	67755.1	67923.9	49656.4	49761.6	57147.8	49656.4	49656.4	49711.8	59626.2	50289.8	49668.6	726.9	36715.9	36750.7	30408.8	30423.4	30656
725.6	45170.6	44741.6	36375.8	36375.8	37783.8	36649.3	36375.8	36394.1	43074.2	36266.9	36452.4	726.8	45454.3	45786.5	37508.3	37508.3	37637.5	37508.3	44482.8	38037.9	38153.4	721.7	41938	41582.9	31389.9	31389.9	34953	31390	35031.8	34375.9	31391.6	725.2	68316.1	68258.6	49471.8	49578.5	57426.2	49471.8	49471.8	49528	59452.8	50149.8	49482.3	726.8	36204.5	36922.4	30355	30369.8	30617.1
725.5	44917.5	44918	36277.2	36277.2	37865.2	36568	36277.2	36295.8	43060.7	36168.3	36346	726.7	45978.1	45935.1	37434.5	37434.5	37593.5	37434.5	44630.8	37979	38035.3	721.6	41601.5	41169.6	31296.5	31296.5	34619.3	31296.5	34758.2	34383.4	31298	725.1	68664.5	68571.4	49278	49386.1	57693.8	49278	49278	49335	59256.4	50003.1	49287.1	726.7	36265.6	37098.7	30305.1	30320.1	30583.5
725.4	45133	45102	36180.3	36180.3	37961.5	36489.3	36180.3	36199.1	43040.1	36071.3	36242.1	726.6	45972.8	46083.5	37357	37357	37551.5	37357	44769.9	37917.3	37915.8	721.5	41106.4	40764.9	31204.4	31204.4	34288.6	31204.5	34489.7	34394	31205.6	725	68649.2	68859.1	49077.5	49187.1	57947.1	49077.5	49077.5	49135.3	59039.7	49852.1	49085.2	726.6	37485.4	37274.3	30254.3	30269.4	30550.6
725.3	45445.1	45287.7	36079.9	36079.9	38067	36408.1	36079.9	36099	43007	35970.9	36135.3	726.5	46968.2	46234.6	37279.1	37279.1	37515.6	37279.1	44902.2	37855.9	37798	721.4	40669.7	40371.9	31114.5	31114.5	33963.8	31114.7	34227.4	34408.5	31115.6	724.9	68761.5	69120.5	48874.7	48985.7	58184.9	48874.7	48874.7	48933.3	58807.1	49701.4	48881.3	726.5	37002.4	37438.6	30192.6	30207.9	30508.8
725.2	45517.7	45472.3	35974.9	35974.9	38179.3	36323.1	35974.9	35994.3	42959.9	35865.8	36024.5	726.4	45702.8	46382.3	37194.5	37194.5	37480.5	37194.5	45020.7	37788.8	37675.7	721.3	40662.5	39992	31026.6	31026.6	33646.1	31026.8	33971.3	34426.6	31027.5	724.8	69149.2	69348	48667.9	48780.5	58399.5	48667.9	48667.9	48727.4	58557.1	49549.5	48673.6	726.4	37506.2	37605.3	30134.5	30150	30472.7
725.1	45985.4	45657.3	35868	35868	38300.1	36237.2	35868	35887.6	42901.2	35758.8	35912.2	726.3	47460.4	46540.7	37117.2	37117.2	37461	37117.2	45138.5	37729.9	37562.8	721.2	39815.1	39625.2	30938.2	30938.2	33335.2	30938.5	33719.6	34445.8	30939	724.7	69240.3	69530.8	48453.8	48568	58579.7	48453.8	48453.8	48514.2	58286.4	49392.8	48458.6	726.3	37865.9	37765.8	30071.6	30087.3	30434.4
725	45890.6	45836.1	35754.6	35754.6	38423	36145.8	35754.6	35774.5	42826.3	35645.4	35794.1	726.2	47724.2	46690.9	37028.6	37028.6	37439.5	37028.6	45236.1	37660.6	37440.7	721.1	39734.3	39277.1	30854	30854	33036.9	30854.3	33476.8	34470.5	30854.7	724.6	69309.1	69666	48235.9	48351.7	58722.3	48235.9	48235.9	48297.2	57999	49235.2	48240	726.2	37677.7	37920.4	30005.1	30021	30395.4
724.9	45945.3	46013	35641	35641	38552.6	36055.2	35641	35661.2	42741.2	35531.8	35676.2	726.1	47318.5	46842.6	36937.9	36937.9	37426	36937.9	45321.7	37590.2	37318.4	721	39138.3	38945.2	30769.8	30769.8	32748.5	30770.2	33239.2	34496.4	30770.4	724.5	69228.8	69746.2	48014.4	48131.8	58819.8	48014.4	48014.4	48076.6	57695.5	49076.8	48017.9	726.1	37789.9	38073.7	29939.7	29955.8	30361
724.8	46194.7	46184.3	35525.5	35525.5	38685.2	35963.7	35525.5	35546	42644	35416.3	35556.8	726	46221.3	46999.7	36849.1	36849.1	37425.5	36849.1	45398.7	37522.8	37199.9	720.9	39251.2	38633.2	30688.5	30688.5	32473.5	30689	33009.7	34526.1	30689	724.4	68878.1	69766.7	47791.2	47910.3	58866.7	47791.2	47791.2	47854.4	57377.8	48919.5	47794.2	726	37983.6	38222.5	29872.7	29889	30329.2
724.7	46260.5	46344.8	35406	35406	38815.7	35869.3	35406	35426.8	42532.6	35296.7	35433.7	725.9	46295.8	47166.5	36766.5	36766.5	37443.2	36766.5	45470.5	37462.8	37089.5	720.8	38858.1	38337.5	30606.1	30606.1	32208.6	30606.6	32784.4	34555.6	30606.5	724.3	69210.3	69724.7	47569.6	47690.4	58859.9	47569.6	47569.6	47633.7	57049.8	48766.7	47572.1	725.9	38161.2	38366.2	29803.5	29820	30300
724.6	46225.1	46494.1	35284.4	35284.4	38943.9	35773.8	35284.4	35305.5	42408.9	35175.1	35309	725.8	46940.7	47336.3	36682.9	36682.9	37472.9	36682.9	45529.4	37402.9	36979.9	720.7	38174.9	38061.7	30525.3	30525.3	31957.4	30526.1	32566.5	34587.4	30525.7	724.2	68986.9	69606.2	47341.1	47463.6	58785	47341.1	47341.1	47406.2	56703.7	48610	47343.2	725.8	37845.6	38504.9	29732.3	29749	30274.3
724.5	46304.3	46630.2	35161.8	35161.8	39067.7	35678.5	35161.8	35183.2	42274	35052.4	35183.6	725.7	47381.9	47505.1	36594.9	36594.9	37511.5	36594.9	45570.9	37339.9	36867.5	720.6	37342.6	37807.3	30448	30448	31721.5	30448.9	32357.5	34623.1	30448.3	724.1	69382.3	69414.4	47112.5	47236.8	58644.7	47112.5	47112.5	47178.6	56346.4	48456.2	47114.3	725.7	37641.5	38642.7	29663	29680	30257.2
724.4	46449.4	46748.9	35037	35037	39182.8	35582.1	35037	35058.7	42126.7	34927.6	35056.2	725.6	47586.1	47674.6	36503.6	36503.6	37561	36503.6	45596	37274.9	36753.5	720.5	38110.7	37575.2	30374.8	30374.8	31502	30375.9	32158.4	34663	30375	724	69273.7	69139.8	46876.2	47002.3	58428.7	46876.2	46876.2	46943.3	55971.2	48297.6	46877.7	725.6	39310.5	38779.3	29595	29612.1	30249
724.3	46522.9	46846.7	34909.2	34909.2	39285.6	35483.8	34909.2	34931.2	41966.3	34799.7	34926.1	725.5	47672.8	47845.5	36410.5	36410.5	37623.1	36410.5	45605.2	37209.5	36639.2	720.4	37102.9	37356.1	30296.9	30296.9	31290	30298.3	31960.2	34698.2	30297.1	723.9	69176.1	68788.4	46638.3	46766.3	58142.6	46638.3	46638.3	46706.5	55584.6	48140.5	46639.6	725.5	39079.2	38898.9	29512.1	29529.5	30234.7
724.2	46466.4	46920.9	34779.1	34779.1	39373.3	35384.4	34779.1	34801.4	41793.8	34669.6	34794	725.4	48441.6	48018.5	36316.3	36316.3	37698.6	36316.3	45598.8	37144.5	36525.4	720.3	37087.3	37159.3	30224.2	30224.2	31094.9	30225.9	31772.8	34738.3	30224.4	723.8	68410.9	68362	46398.7	46528.6	57787.6	46398.7	46398.7	46468	55186.9	47984.7	46399.8	725.4	38479.4	39018.4	29430.5	29448.1	30231.6
724.1	46856.9	46970.3	34648.2	34648.2	39444.7	35285.4	34648.2	34670.9	41610.6	34538.7	34661.3	725.3	48410.5	48189	36216.7	36216.7	37783.6	36216.7	45572.4	37075.7	36407.6	720.2	36906.2	36978.9	30151.2	30151.2	30911	30153.3	31590.8	34777.4	30151.4	723.7	68082.4	67873	46165.6	46297.4	57375.4	46165.6	46165.6	46236	54787.4	47838.4	46166.5	725.3	39313.1	39141.6	29353.3	29371.1	30244.4
724	46983.8	46987.1	34511.5	34511.5	39491.4	35181.7	34511.5	34534.5	41412.2	34401.9	34523	725.2	48599.1	48360.9	36116.8	36116.8	37882.2	36116.8	45530.2	37008.1	36290.8	720.1	36869	36814.6	30078.8	30078.8	30738.6	30081.3	31414.8	34816.2	30078.9	723.6	67834	67321.2	45933.7	46067.4	56905.3	45933.7	45933.7	46005.2	54380.9	47696.3	45934.4	725.2	39866.8	39257	29268.4	29286.4	30261.9
723.9	47110.5	46971.5	34371.9	34371.9	39513.8	35076.3	34371.9	34395.2	41201.5	34262.2	34381.9	725.1	49371.7	48532	36015.1	36015.1	37992.7	36015.1	45470.8	36940.4	36173.4	720	36790	36664.9	30006.2	30006.2	30576.5	30009.2	31244.2	34853.5	30006.3	723.5	67078	66712.9	45701.9	45837.7	56382.7	45701.9	45701.9	45774.6	53967.6	47557.4	45702.6	725.1	39520	39368.1	29178	29196.2	30288
723.8	46910	46921.6	34229.3	34229.3	39509.3	34969.2	34229.3	34253	40978.8	34119.6	34238	725	49371.4	48697.4	35908	35908	38110.2	35908	45390.2	36869.1	36051.9	719.9	36392.5	36529	29933.6	29933.6	30424.3	29937.3	31079	34889.2	29933.7	723.4	65883.1	66061.7	45476.7	45614.6	55820.8	45476.7	45476.7	45550.6	53554.2	47427.9	45477.2	725	39565	39483.1	29089.8	29108.3	30331.4
723.7	46318.4	46838.8	34087.3	34087.3	39479.3	34863.9	34087.3	34111.4	40748.2	33977.6	34094.9	724.9	48871.8	48860.3	35800.2	35800.2	38238.2	35800.2	45293.2	36798.9	35930.8	719.8	35800.2	36407.4	29862.8	29862.8	30282.9	29867.4	30920.7	34924.8	29862.9	723.3	65601.7	65380.9	45263.5	45403.5	55232.3	45263.5	45263.5	45338.6	53146.7	47313.5	45264	724.9	40596.9	39599.6	29000.4	29019.2	30389.9
723.6	46377.3	46726.2	33950.3	33950.3	39426.3	34764.9	33950.3	33974.8	40514.3	33840.6	33957	724.8	49953.8	49022.3	35694.9	35694.9	38378.1	35694.9	45182.6	36733.1	35813.2	719.7	35300.3	36300.1	29795	29795	30152.9	29800.5	30770.5	34960.9	29795	723.2	65380.2	64668	45051.2	45193.4	54613.9	45051.2	45051.2	45127.5	52735	47202.7	45051.5	724.8	39828.7	39709.9	28901.5	28920.5	30455.8
723.5	46374.8	46575.6	33811.2	33811.2	39341.9	34664.9	33811.2	33836	40270.4	33701.4	33817	724.7	49634.2	49171.3	35582.3	35582.3	38518	35582.3	45048.8	36662	35689.3	719.6	35505.7	36205.3	29729.5	29729.5	30033	29736.1	30627.7	34996.8	29729.5	723.1	64764.9	63929.4	44839	44983.4	53971.5	44839	44839	44916.6	52318.7	47094.9	44839.3	724.7	40053.4	39829.3	28808.3	28827.6	30544.7
723.4	46276.1	46387.2	33670.5	33670.5	39225.7	34564.6	33670.5	33695.7	40017.5	33560.7	33675.6	724.6	49139.4	49313.9	35470.9	35470.9	38664.2	35470.9	44900.5	36594.3	35567.7	719.5	36509.9	36118	29662.5	29662.5	29918.7	29670.5	30488.2	35027.9	29662.5	723	63860.8	63178.2	44631.8	44778.4	53317.5	44631.8	44631.8	44710.6	51903.7	46994.7	44632	724.6	41592	39949.1	28712.3	28731.9	30647.9
723.3	45955.9	46161.9	33529.4	33529.4	39078.4	34465.1	33529.4	33555	39757.1	33419.5	33533.8	724.5	49259	49448.4	35361.9	35361.9	38814.8	35361.9	44739	36531	35449.2	719.4	37112.5	36032.5	29589.5	29589.5	29804.8	29599.2	30347.4	35049.6	29589.6	722.9	62790.2	62424.4	44433.2	44582.2	52661.4	44433.2	44433.2	44513.4	51494.1	46905.8	44433.4	724.5	41253.7	40056.4	28602.5	28622.3	30752.3
723.2	45842.3	45903	33390.2	33390.2	38902.7	34368.8	33390.2	33416.3	39492.2	33280.3	33394	724.4	49226.1	49568.3	35251.5	35251.5	38963.3	35251.5	44560.7	36468.6	35330.1	719.3	36213.2	35949.8	29512.9	29512.9	29692.8	29524.5	30207.3	35063.7	29512.9	722.8	61288.4	61676.2	44245.4	44396.8	52010.9	44245.4	44245.4	44327	51092.5	46830.4	44245.6	724.4	40211.7	40164.5	28494.6	28514.7	30871.1
723.1	45791.8	45609.1	33250.8	33250.8	38696.7	34273.4	33250.8	33277.3	39220.9	33140.9	33254.1	724.3	48702.2	49672.1	35140.6	35140.6	39107.6	35140.6	44366.9	36408	35211.4	719.2	36107.7	35877	29440.7	29440.7	29590.5	29454.7	30076.1	35077.8	29440.8	722.7	60247.2	60945.3	44073.9	44227.8	51377.1	44073.9	44074	44157	50705.5	46773.7	44074.1	724.3	40668.5	40274.7	28394.6	28415	31005.3
723	45668.3	45281.2	33110.4	33110.4	38460.9	34178.3	33110.4	33137.3	38943.2	33000.4	33113.2	724.2	49579.6	49759.4	35032.2	35032.2	39246.8	35032.2	44161.1	36352.3	35095.8	719.1	35340.5	35808.6	29368.8	29368.8	29492.9	29385.6	29949.2	35087.4	29368.8	722.6	60268.9	60230.4	43913.3	44069.6	50758.2	43913.3	43913.3	43997.7	50327.8	46730.1	43913.4	724.2	40546.5	40366.8	28289.9	28310.6	31134.5
722.9	45053.7	44922.2	32969.8	32969.8	38197.7	34084.1	32969.8	32997.1	38660.3	32859.8	32972.2	724.1	49054.7	49818.9	34917.8	34917.8	39369.4	34917.8	43935.1	36293.1	34974.9	719	35055.6	35747.1	29300.7	29300.7	29403	29320.8	29830	35095.6	29300.8	722.5	59401.2	59523.4	43750.4	43909.2	50145.5	43750.4	43750.4	43836.3	49947.3	46686.3	43750.4	724.1	39599.5	40435.8	28185.4	28206.4	31253.1
722.8	44041.8	44539.7	32834.5	32834.5	37914.3	33996.4	32834.5	32862.2	38378.1	32724.5	32836.6	724	50033.6	49856.2	34806	34806	39480.1	34806	43698.1	36238.8	34857.1	718.9	34876.8	35689	29233.9	29233.9	29317.8	29257.7	29715.8	35099.3	29233.9	722.4	58903.2	58838.7	43596.2	43757.7	49553.2	43596.2	43596.2	43683.6	49575.5	46653.3	43596.2	724	39536.8	40476	28088	28109.3	31354.9
722.7	43775.9	44141.4	32709	32709	37617.9	33919.7	32709	32737.2	38101.7	32598.9	32710.7	723.9	50171.1	49859.4	34687.4	34687.4	39566.5	34687.4	43441.4	36180.4	34733.1	718.8	35622.3	35632.6	29167.6	29167.6	29236.1	29196	29605.7	35097.6	29167.6	722.3	57984	58174.6	43446.3	43610.5	48979.1	43446.3	43446.3	43535.3	49208.2	46626.6	43446.3	723.9	39873.5	40465.7	27990.4	28012	31417.7
722.6	43543.6	43721.8	32585	32585	37302.5	33845.7	32585	32613.7	37823.5	32474.9	32586.5	723.8	50452	49831	34567.2	34567.2	39630.6	34567.2	43170.8	36123.2	34608	718.7	35729.7	35572	29096.8	29096.8	29152.5	29130.5	29494.5	35085.1	29096.9	722.2	57450.8	57539.6	43305.9	43472.8	48431.2	43305.9	43305.9	43396.5	48851.6	46610.9	43305.9	723.8	40403	40388	27889	27910.9	31424.1
722.5	43130.8	43284.5	32462.2	32462.2	36971	33773.9	32462.2	32491.4	37543.6	32352.1	32463.5	723.7	49467.3	49767.9	34444.6	34444.6	39668.3	34444.6	42886.2	36066.2	34481	718.6	35550.2	35510	29025.1	29025.1	29070.1	29065	29385.4	35064.8	29025.1	722.1	57766.6	56930.5	43170.4	43340.2	47906.2	43170.4	43170.4	43262.7	48501.2	46601.8	43170.4	723.7	40267.3	40231.2	27782.2	27804.5	31361.5
722.4	42824.8	42834.6	32342.7	32342.7	36628.2	33706.5	32342.7	32372.4	37264.6	32232.5	32343.8	723.6	50644.3	49676	34327.2	34327.2	39684.9	34327.2	42596	36017.2	34359.7	718.5	35224.7	35447.3	28954	28954	28990.2	29001	29280	35038	28954	722	56837.8	56339.2	43029.3	43202	47395.5	43029.3	43029.3	43123.3	48147.4	46588.2	43029.3	723.6	40487.4	39997	27675.8	27698.3	31230.8
722.3	42827.6	42374.5	32225.3	32225.3	36276	33642.3	32225.3	32255.4	36985.8	32115.1	32226.2	723.5	50075.7	49540.5	34202	34202	39664.6	34202	42287.8	35963.2	34230.8	718.4	34826.3	35384.2	28884.2	28884.2	28913.3	28939.7	29178.7	35005.2	28884.2	721.9	56104.8	55781.8	42898	43073.6	46915	42898	42898	42993.7	47805.7	46585.6	42898	723.5	40410.7	39685.8	27566.5	27589.4	31031.7
722.2	42489.6	41904.8	32106.5	32106.5	35914.4	33577.6	32106.5	32137.2	36704.4	31996.3	32107.3	723.4	49254.9	49371.2	34079.4	34079.4	39616.5	34079.4	41973.2	35914.7	34105	718.3	35390.8	35320.7	28816.3	28816.3	28839.5	28881.5	29081.9	34966.8	28816.3	721.8	55319.3	55256.7	42774.1	42952.8	46463	42774.1	42774.1	42871.6	47474.3	46591.3	42774.1	723.4	39530.3	39310	27456.9	27480.1	30775.9
722.1	41684.3	41432.3	31990.1	31990.1	35549.9	33516.4	31990.1	32021.4	36424.5	31879.9	31990.8	723.3	48922.5	49169.2	33961.1	33961.1	39540.9	33961.1	41654.4	35873.5	33983.8	718.2	34899.5	35251	28744.9	28744.9	28763.3	28821.4	28984	34917	28744.9	721.7	54592.8	54765.6	42658.4	42840.3	46040.8	42658.4	42658.4	42757.8	47154.6	46605.9	42658.5	723.3	38936.2	38890.8	27353.9	27377.5	30483.5
722	41039	40966.2	31881.5	31881.5	35191.1	33463.8	31881.5	31913.3	36152.1	31771.2	31882.1	723.2	49268.6	48931.7	33844.2	33844.2	39433.9	33844.2	41329.6	35836.5	33864.3	718.1	34515.2	35180.6	28675.8	28675.8	28690.3	28765.3	28890.8	34861.6	28675.8	721.6	53533.7	54307.5	42550.4	42735.4	45647.4	42550.4	42550.4	42651.7	46845.9	46628.5	42550.4	723.2	38810.7	38441.8	27255.1	27279.1	30167.2
721.9	40693.1	40507.8	31778.8	31778.8	34838.9	33418	31778.8	31811.2	35885.8	31668.5	31779.3	723.1	48503.9	48655.2	33724.4	33724.4	39291.2	33724.4	40995.2	35799.7	33742.2	718	34985.6	35108.9	28608.5	28608.5	28619.9	28713	28801.4	34800	28608.5	721.5	53650.7	53886.8	42454.1	42642.4	45287.2	42454.1	42454.1	42557.4	46553.1	46663.1	42454.1	723.1	38690.1	37973.4	27156.6	27180.9	29836.7
721.8	40109.3	40056.5	31678.8	31678.8	34492.5	33375.8	31678.8	31711.8	35622.8	31568.5	31679.3	723	47485.9	48347.8	33608.6	33608.6	39120.2	33608.6	40659.2	35769.8	33624.2	717.9	34462.4	35030.9	28538.1	28538.1	28547	28659.9	28711.1	34727.3	28538.1	721.4	53454.8	53488.6	42355.2	42546.9	44945.1	42355.2	42355.2	42460.5	46262	46694.8	42355.2	723	38185.5	37498.3	27058.2	27082.9	29503.4
721.7	39823.3	39618.3	31584.3	31584.3	34157.3	33339.7	31584.3	31617.8	35366.2	31474	31584.7	722.9	48053	48013.1	33498.3	33498.3	38923.3	33498.3	40324	35748.5	33512.1	717.8	35368.4	34952.3	28470.3	28470.3	28477.3	28611.9	28625	34649	28470.3	721.3	52078.6	53115.8	42257.5	42452.7	44624	42257.5	42257.5	42364.9	45976.6	46727.6	42257.5	722.9	37418.1	37028.8	26963.3	26988.3	29179
721.6	39104	39191.8	31491.9	31491.9	33831.7	33306.5	31491.9	31526	35113.2	31381.5	31492.2	722.8	47914.3	47643.4	33383.8	33383.8	38692.2	33383.8	39980.6	35726.1	33396	717.7	34207.5	34865.2	28397.1	28397.1	28402.5	28561.3	28535.3	34557.4	28397.1	721.2	52255.4	52782.6	42175.6	42374.4	44338.1	42175.6	42175.6	42285.2	45711.9	46775.4	42175.6	722.8	37024.6	36573.8	26874.1	26899.5	28871.3
721.5	38601.9	38784.4	31406.5	31406.5	33522.6	33280.9	31406.5	31441.2	34869.1	31296.1	31406.7	722.7	47828.4	47246.3	33269.5	33269.5	38433.4	33269.5	39634.4	35706.8	33280.2	717.6	34120	34781.4	28329.9	28329.9	28334.1	28519.9	28453.2	34464	28329.9	721.1	52382.8	52468.6	42090.6	42293	44067.2	42090.6	42090.6	42202.4	45449	46819.3	42090.6	722.7	37631.3	36135.1	26787.5	26813.4	28581
721.4	38365.6	38395.3	31325.7	31325.7	33229	33260.5	31325.7	31361.1	34631.9	31215.3	31325.9	722.6	46573.7	46824.4	33155	33155	38148.8	33155	39285.8	35690.4	33164.4	717.5	34421	34695.3	28262.8	28262.8	28266	28482.2	28372.6	34363.1	28262.8	721	51474.9	52173.6	42002.9	42209.1	43810.9	42002.9	42002.9	42117	45188.8	46859.2	42002.9	722.6	36500.3	35706.3	26695	26721.3	28301.3
721.3	38124.9	38022.8	31246.6	31246.6	32949.1	33242.3	31246.6	31282.7	34398.8	31136.2	31246.8	722.5	47718.4	46388.9	33047.6	33047.6	37848.7	33047.6	38943	35684	33055.8	717.4	34761.8	34605.2	28193.7	28193.7	28196.2	28446.4	28291.3	34252.6	28193.7	720.9	50937.5	51908.9	41925.3	42135.4	43581	41925.3	41925.3	42041.9	44944.1	46907.8	41925.3	722.5	34993.4	35304.4	26611.4	26638.1	28047.7
721.2	37797.5	37668.4	31169.4	31169.4	32683.8	33226.4	31169.4	31206.2	34170.5	31059	31169.5	722.4	46849.7	45928.6	32932.4	32932.4	37521.2	32932.4	38592.1	35672.8	32939.6	717.3	34488.8	34511.4	28122.4	28122.4	28124.2	28412.7	28209	34132.6	28122.4	720.8	51583.9	51668.8	41853.5	42067.6	43371.6	41853.5	41853.5	41972.6	44710.5	46960.5	41853.5	722.4	35919.1	34933.1	26539.9	26567	27823.5
721.1	37212.9	37333.5	31094.9	31094.9	32434.6	33213.6	31094.9	31132.4	33948	30984.5	31095.1	722.3	45415	45459.8	32821.8	32821.8	37182	32821.9	38246	35669.3	32828.2	717.2	35039.1	34418	28052.1	28052.1	28053.5	28385	28128.8	34006.9	28052.1	720.7	50825	51437.4	41772.8	41991	43167.3	41772.8	41772.8	41894.5	44473.7	47002.1	41772.8	722.3	35292.8	34571.8	26459.9	26487.5	27607.1
721	36599.3	37021.7	31026.2	31026.2	32204.8	33206.7	31026.2	31064.4	33734.7	30915.7	31026.3	722.2	45546.4	44990.6	32719.5	32719.5	36838.1	32719.5	37909.2	35676.7	32725	717.1	34181.5	34321.1	27978.4	27978.4	27979.5	28359.3	28046.3	33871.2	27978.4	720.6	50580.1	51230.7	41700.5	41922.9	42984	41700.5	41700.5	41825	44250.9	47049.8	41700.5	722.2	34468.4	34233.8	26384.5	26412.6	27410.9
720.9	36316.5	36733.6	30963.5	30963.5	31994.8	33206.1	30963.5	31002.5	33531.1	30853	30963.6	722.1	44696.6	44514.9	32615.6	32615.6	36483.2	32615.7	37572.7	35685.4	32620.4	717	34681.5	34229.2	27909	27909	27909.8	28343.8	27969	33733.7	27909	720.5	51124	51041	41630.3	41857.1	42814.4	41630.3	41630.3	41757.7	44036.1	47097	41630.3	722.1	34101.9	33920.1	26315.6	26344.1	27235.5
720.8	35940.5	36465.2	30903.3	30903.3	31800.5	33208.1	30903.3	30943	33333.8	30792.8	30903.4	722	44623.7	44043.4	32516.4	32516.4	36127	32516.4	37243.4	35701.5	32520.5	716.9	34549.1	34135.8	27836.5	27836.5	27837.1	28331.6	27889.4	33587.2	27836.5	720.4	50880	50857.3	41552.5	41783.8	42647.8	41552.5	41552.5	41682.9	43819.3	47133.6	41552.5	722	33959.7	33626.5	26249.1	26278.1	27075.6
720.7	35633	36217.6	30846.6	30846.6	31623	33213.6	30846.6	30887.1	33144	30736.1	30846.7	721.9	44516.4	43574.8	32417	32417	35768.1	32417	36917	35719.9	32420.6	716.8	33853.3	34045.2	27764.3	27764.3	27764.8	28326.9	27810.9	33435.6	27764.3	720.3	51182.2	50687.9	41476.8	41712.6	42492.6	41476.8	41476.8	41610.4	43610.3	47169.1	41476.8	721.9	33851.5	33350.3	26183.4	26212.8	26928
720.6	35530.9	35989.3	30792.7	30792.7	31460.8	33221.8	30792.7	30834.1	32961.2	30682.2	30792.7	721.8	44411.8	43112.7	32317.6	32317.6	35409.4	32317.7	36594.3	35741	32320.8	716.7	33522.9	33961.6	27695.6	27695.6	27695.9	28333.3	27736.6	33282.6	27695.6	720.2	50715.8	50524.8	41396.4	41637	42341.2	41396.4	41396.4	41533.4	43402.4	47196.4	41396.4	721.8	33063	33090.3	26118	26148	26791.2
720.5	35733	35777.8	30739.3	30739.3	31311.1	33230.3	30739.3	30781.6	32783.2	30628.8	30739.4	721.7	43911.8	42660.9	32218.3	32218.3	35054.3	32218.4	36276	35764.3	32221	716.6	33762.6	33883.9	27628.3	27628.3	27628.6	28349.7	27664.3	33126.3	27628.3	720.1	50519.1	50376.3	41320.7	41566.2	42202.2	41320.7	41320.8	41461.3	43204.8	47224.7	41320.7	721.7	33336.5	32852	26058.7	26089.2	26669.7
720.4	35601.2	35578.8	30683.1	30683.1	31169.8	33235.8	30683.1	30726.2	32606.8	30572.6	30683.1	721.6	43338.2	42224.4	32121.4	32121.4	34707.4	32121.6	35964.8	35792.5	32123.8	716.5	34832.6	33810.1	27559.3	27559.3	27559.5	28373.4	27590.9	32964.3	27559.3	720	49827	50238	41246.6	41497.1	42071.4	41246.6	41246.6	41391	43014.5	47250.3	41246.6	721.6	33164.5	32625.2	25996.6	26027.7	26553.3
720.3	35196.1	35395.1	30627.7	30627.7	31039.7	33241.7	30627.7	30671.8	32435.7	30517.2	30627.8	721.5	42622.4	41806.5	32027.5	32027.5	34371.8	32027.7	35661.9	35825.5	32029.5	716.4	33902.3	33736.6	27484.1	27484.1	27484.2	28400.6	27511.6	32792.3	27484.1	719.9	50370.1	50114.9	41180.2	41435.9	41954.3	41180.2	41180.2	41328.7	42837.3	47279.3	41180.2	721.5	32349.6	32413.4	25935.5	25967.1	26444.8
720.2	35042.3	35229	30576.3	30576.3	30923	33251	30576.3	30621.3	32273	30465.7	30576.3	721.4	41940.2	41410.1	31937.3	31937.3	34050.1	31937.6	35368.4	35864.2	31939.1	716.3	33007	33675.5	27413.5	27413.5	27413.6	28443.2	27437.6	32621.7	27413.5	719.8	50459.2	49990.8	41106.1	41367.2	41834.8	41106.1	41106.1	41259.1	42658	47296.3	41106.1	721.4	32165.6	32221.2	25880.8	25912.9	26348.5
720.1	34987.2	35076.7	30526	30526	30816.2	33260.9	30526	30572	32116	30415.4	30526	721.3	41525.9	41036.5	31850.9	31850.9	33743.7	31851.2	35084.4	35908.3	31852.4	716.2	33557.1	33627.9	27347.5	27347.5	27347.6	28501.6	27368.5	32452.7	27347.5	719.7	49963.8	49870.3	41030.1	41296.7	41717.9	41030.1	41030.1	41187.8	42482	47306.2	41030.1	721.3	32252.9	32042.7	25827.2	25859.9	26258.4
720	35091.3	34936.4	30475.7	30475.7	30717.3	33270.2	30475.7	30522.8	31963.7	30365.1	30475.7	721.2	41518.5	40685.8	31766.4	31766.4	33452.3	31766.8	34808.7	35955.8	31767.7	716.1	34666.4	33586.9	27278.1	27278.1	27278.2	28568.8	27296.4	32277.9	27278.1	719.6	50363.4	49759.8	40959.2	41231.5	41610.3	40959.2	40959.2	41122.1	42316.4	47316.4	40959.2	721.2	32412.2	31875.3	25772.4	25805.7	26171.4
719.9	35022.6	34805.2	30423.7	30423.7	30623.8	33277	30423.7	30471.9	31814.2	30313.1	30423.7	721.1	40646.2	40356	31681.5	31681.5	33174.2	31682	34539	36004.1	31682.6	716	33662.6	33550.4	27202.2	27202.2	27202.2	28642.2	27218.1	32094.4	27202.2	719.5	50520.6	49647.4	40882.6	41160.7	41500.5	40882.6	40882.6	41051.1	42150.1	47315.3	40882.6	721.1	32390.1	31717.6	25715.7	25749.6	26086.2
719.8	34785.1	34684.1	30371.9	30371.9	30536.6	33283.1	30371.9	30421.2	31669.3	30261.3	30371.9	721	40154.8	40053.3	31601.4	31601.4	32915.4	31602	34281	36058	31602.3	715.9	34334.5	33531.2	27131.4	27131.4	27131.4	28734.4	27145.2	31914.3	27131.4	719.4	50002	49535.4	40803	41087.2	41390.8	40803	40803	40977.7	41985.8	47305.9	40803	721	31799.9	31570.8	25658.8	25693.3	26003.9
719.7	34721.2	34574.1	30322.1	30322.1	30457	33290.3	30322.1	30372.8	31531.1	30211.5	30322.1	720.9	39786.2	39775.3	31523.8	31523.8	32673.8	31524.6	34032.3	36115.1	31524.6	715.8	34123.7	33521.2	27056.5	27056.6	27056.5	28837	27068.5	31728.7	27056.5	719.3	49988.7	49431.4	40728.8	41019.3	41289.3	40728.8	40728.8	40910.3	41831.6	47296.2	40728.8	720.9	30799.9	31439.4	25606.4	25641.6	25928.8
719.6	34923.3	34472.6	30272.5	30272.5	30382.4	33296.6	30272.5	30324.5	31397.4	30162	30272.6	720.8	40196.9	39520.8	31448	31448	32448.5	31449	33792.3	36174.4	31448.7	715.7	33177.7	33526.3	26982.4	26982.4	26982.4	28955.4	26992.7	31542.8	26982.4	719.2	49677.7	49328.7	40654	40950.9	41189.5	40654	40654	40842.9	41681.4	47279.8	40654	720.8	31361	31326.3	25562.1	25597.9	25864.1
719.5	35050.8	34375.6	30220.2	30220.2	30309.1	33298.8	30220.2	30273.5	31265.2	30109.6	30220.2	720.7	39292	39285	31369.2	31369.2	32234.5	31370.4	33556.6	36230.6	31369.8	715.6	34313.2	33551.5	26913	26913.1	26913.1	29094.7	26922	31360.9	26913	719.1	49657	49230.3	40582	40885.7	41094.6	40582	40582	40779.2	41538.5	47260.3	40582	720.7	30926.2	31217.9	25512.6	25549.1	25796.2
719.4	34794.8	34283.3	30165.8	30165.8	30237.4	33297.8	30165.8	30220.7	31135.4	30055.2	30165.8	720.6	38952.8	39074.7	31295.5	31295.5	32039.5	31297	33332.8	36291.5	31296.1	715.5	33165.4	33586.3	26837.1	26837.2	26837.1	29243.6	26844.8	31172	26837.1	719	49410.3	49132.4	40509.4	40820	41000.9	40509.4	40509.4	40715.8	41399.4	47233.9	40509.4	720.6	30894.4	31122.3	25466.5	25503.7	25733.2
719.3	34480.7	34199.2	30113.6	30113.6	30171	33297.6	30113.6	30170.2	31011.9	30003	30113.6	720.5	39103.9	38885.8	31223.5	31223.5	31859.4	31225.3	33118	36353.2	31223.9	715.4	34382.3	33644.2	26767	26767.2	26767	29415.7	26773.7	30988.8	26767	718.9	49146.7	49037.3	40439	40756.7	40911	40439	40439	40655.7	41266.5	47203.3	40439	720.5	31052.3	31035.6	25420.2	25458.1	25671.6
719.2	34472.3	34123.3	30064.4	30064.4	30110.1	33298.9	30064.4	30122.7	30895.4	29953.8	30064.4	720.4	38465	38713.9	31150.1	31150.1	31690.5	31152.2	32908.8	36412.3	31150.4	715.3	34659.6	33713.1	26689.8	26690.1	26689.8	29598.5	26695.5	30798.5	26689.8	718.8	48958.4	48944.9	40370.9	40696.1	40824.9	40370.9	40370.9	40599.1	41139.9	47168.6	40370.9	720.4	30625	30955.6	25372.1	25410.8	25609.6
719.1	34500.1	34051.6	30014.7	30014.7	30050.9	33298.2	30014.7	30075	30782.3	29904.1	30014.7	720.3	38969.9	38562.6	31080.1	31080.1	31536.6	31082.8	32710	36473.2	31080.4	715.2	33756.2	33798.6	26610.7	26611.1	26610.7	29797.4	26615.6	30606.6	26610.7	718.7	49219.3	48854.2	40304.4	40637.2	40741.5	40304.4	40304.4	40545.4	41018.7	47128.8	40304.4	720.3	29965.7	30887	25327.3	25366.7	25551.9
719	34061.3	33983.2	29964.2	29964.2	29992.7	33294.8	29964.2	30026.6	30672.3	29853.6	29964.2	720.2	37871.9	38423.3	31006.6	31006.6	31390	31009.9	32514.6	36528.4	31006.9	715.1	34085.2	33908.2	26536.1	26536.7	26536.1	30019.8	26540.3	30419.8	26536.1	718.6	48956.7	48759.2	40233.8	40574.5	40655.2	40233.8	40233.8	40489.3	40896.9	47078.4	40233.8	720.2	30503.3	30831.2	25287.8	25327.9	25500.5
718.9	33916.9	33922.8	29918	29918	29940.3	33294.1	29918	29982.7	30570.2	29807.4	29918	720.1	38286.3	38304.3	30939.4	30939.4	31259.5	30943.4	32332.2	36587.2	30939.7	715	34769.5	34035.3	26459.3	26460.1	26459.3	30258.7	26462.9	30231.5	26459.3	718.5	48554.5	48666.5	40165.5	40514.5	40572.2	40165.5	40165.5	40437.4	40781	47023.6	40165.5	720.1	30931.6	30777.5	25243.3	25284.2	25445.1
718.8	33954.5	33866.7	29872.9	29872.9	29890.3	33292.6	29872.9	29940.2	30472.8	29762.2	29872.9	720	38122.8	38194.9	30869.3	30869.3	31135	30874.1	32153.6	36639.9	30869.5	714.9	33822.4	34178.6	26378.2	26379.4	26378.2	30512.6	26381.3	30040	26378.2	718.4	48711	48577.7	40101.5	40458.9	40494.3	40101.5	40101.5	40391.7	40672.5	46966.1	40101.5	720	30909.4	30726.1	25194.7	25236.5	25386.5
718.7	34023.6	33812.4	29826.8	29826.8	29840.3	33288.2	29826.8	29897.1	30377.9	29716.2	29826.8	719.9	37723.1	38097	30799.7	30799.7	31018.9	30805.5	31982	36689.4	30799.8	714.8	34446.3	34347.4	26302	26303.7	26302	30790.8	26304.6	29854.3	26302	718.3	48827.4	48485.9	40034.6	40400.9	40414.4	40034.6	40034.6	40345.6	40564.3	46899.2	40034.6	719.9	31725.6	30680.4	25146	25188.7	25328.4
718.6	34006	33759.2	29779.5	29779.5	29789.9	33280.5	29779.5	29853	30284.9	29668.9	29779.5	719.8	37376.7	38010.2	30732.1	30732.1	30912	30739.2	31818.7	36736.6	30732.3	714.7	35482.5	34533.1	26221.9	26224.2	26221.9	31084.3	26224.1	29666.2	26221.9	718.2	48674.9	48391.7	39965.5	40341	40332.9	39965.5	39965.6	40299.8	40456.9	46823.2	39965.5	719.8	30339.3	30632.5	25089.9	25133.4	25263.5
718.5	33801.7	33707.8	29731.8	29731.8	29739.8	33270.3	29731.8	29809.1	30194.7	29621.2	29731.8	719.7	36954.3	37932.8	30666.3	30666.3	30813	30674.8	31663.2	36780.6	30666.4	714.6	36078.8	34733.5	26135.6	26138.8	26135.6	31390.9	26137.5	29473.2	26135.6	718.1	48298.2	48298.5	39897.5	40282.4	40253.1	39897.5	39897.5	40258.2	40353.2	46741.5	39897.5	719.7	30273.7	30600.6	25045.1	25089.5	25210.6
718.4	33424	33659.9	29685.9	29685.9	29692	33259.7	29685.9	29767.3	30109.3	29575.3	29685.9	719.6	38056.4	37863.8	30602.7	30602.7	30721.6	30612.9	31515.8	36821.4	30602.8	714.5	35159.1	34950.8	26045.5	26050	26045.5	31712.3	26047.1	29278	26045.5	718	47932.1	48209.4	39833.2	40228.1	40177.8	39833.2	39833.3	40223.7	40255.9	46656.9	39833.2	719.6	30537.1	30572.7	25000.5	25045.9	25158.5
718.3	33283.8	33617.3	29643.7	29643.7	29648.3	33250.6	29643.7	29729.9	30030.3	29533.1	29643.7	719.5	38018.4	37792.1	30531.8	30531.8	30627.7	30544.2	31366.8	36848.9	30531.9	714.4	34650	35193.2	25960	25966.2	25960	32056.7	25961.4	29089.1	25960	717.9	48072	48124.7	39772.8	40177.8	40106.7	39772.8	39772.8	40196.9	40164.8	46569.5	39772.8	719.5	30353.3	30545.3	24953.3	24999.6	25104.2
718.2	33330.8	33577.1	29602.6	29602.6	29606.1	33240.2	29602.6	29694.1	29955.2	29492	29602.6	719.4	37069.5	37723.4	30460.8	30460.8	30537.6	30475.6	31223	36869.6	30460.9	714.3	35919.7	35458.3	25876.9	25885.2	25876.9	32421.3	25878.1	28904.3	25876.9	717.8	47817.2	48038.4	39709.8	40125.5	40033.7	39709.8	39709.8	40171.9	40073.6	46472.9	39709.8	719.4	30729.2	30521.6	24907.2	24954.5	25051.5
718.1	33336.2	33537.1	29560.5	29560.5	29563.1	33226.4	29560.5	29658.2	29881.5	29450	29560.5	719.3	37561.1	37662	30395.2	30395.2	30456.4	30412.9	31089.8	36888.5	30395.3	714.2	36365.1	35735.2	25786.3	25797.6	25786.3	32795.2	25787.3	28714	25786.3	717.7	47590.6	47955.8	39649.2	40076	39963.5	39649.2	39649.2	40154.1	39986.9	46372.3	39649.2	719.3	30110.9	30496.1	24857.5	24905.9	24995.6
718	33381.8	33497.6	29517.9	29517.9	29519.8	33209.6	29517.9	29622.6	29809.8	29407.3	29517.9	719.2	37058.3	37597.7	30326.2	30326.2	30374.6	30347.2	30958.2	36896.1	30326.2	714.1	36604.6	36028.3	25692.7	25708	25692.7	33182.2	25693.5	28522.7	25692.7	717.6	47953	47877.3	39590.7	40028.9	39895.8	39590.7	39590.7	40143.8	39904.2	46267.3	39590.7	719.2	30118.9	30476.4	24812.7	24862.2	24945
717.9	33386.9	33458	29474.3	29474.3	29475.7	33189.3	29474.3	29587.1	29739.3	29363.7	29474.3	719.1	37779.7	37535.5	30259.8	30259.8	30297.9	30284.8	30833.8	36898.2	30259.8	714	35917.3	36337.4	25597.2	25617.7	25597.2	33581.9	25597.9	28331.6	25597.2	717.5	47459.4	47796.1	39526.9	39977.1	39823.2	39526.9	39526.9	40134.2	39818.3	46151	39526.9	719.1	31172.5	30456.7	24767.5	24818	24894.3
717.8	33207	33418.8	29430.2	29430.2	29431.2	33166	29430.2	29552.2	29670.5	29319.6	29430.2	719	37228	37466.8	30188.6	30188.6	30218.4	30218.3	30709.1	36886.7	30188.6	713.9	36667.1	36666.9	25505.1	25532.3	25505.1	33998.3	25505.7	28145.9	25505.1	717.4	47584.8	47723.5	39468.5	39931.2	39756.4	39468.5	39468.5	40136.7	39739.4	46033.9	39468.5	719	30436.3	30427.2	24712.8	24764.5	24834.5
717.7	32998.4	33381.9	29387.5	29387.5	29388.3	33141.5	29387.5	29520.2	29605.1	29277	29387.5	718.9	36991.7	37398.6	30120.3	30120.3	30143.5	30155.6	30591.5	36868.9	30120.3	713.8	36946.2	37008.1	25408.2	25444.3	25408.2	34422.1	25408.7	27957.7	25408.2	717.3	47279	47652.6	39407.8	39883.4	39687.7	39407.8	39407.8	40144.3	39659.9	45908.5	39407.8	718.9	30885.9	30402.4	24664	24716.8	24780.9
717.6	33180.9	33347.8	29346.7	29346.7	29347.3	33116.2	29346.7	29491.6	29543.4	29236.2	29346.7	718.8	36459.8	37328.1	30053.1	30053.1	30071	30094.8	30478.9	36842.6	30053.1	713.7	37894.6	37361.8	25309.3	25356.7	25309.3	34853.8	25309.8	27769.7	25309.3	717.2	47093.8	47589.6	39350.2	39839.3	39622.3	39350.2	39350.2	40163.1	39585	45780.6	39350.2	718.8	30066.8	30371.7	24611	24665	24723.3
717.5	32995.4	33312.1	29303.5	29303.5	29303.9	33085.7	29303.5	29462.3	29481	29192.9	29303.5	718.7	36795	37256.5	29988.7	29988.7	30002.5	30037.9	30372.9	36809.3	29988.7	713.6	37836.8	37723.8	25204.6	25266.5	25204.6	35288.2	25205	27578.1	25204.6	717.1	47012.7	47534	39294.1	39797.3	39558.8	39294.1	39294.1	40192.5	39513	45648.6	39294.1	718.7	29825.7	30345.1	24564.4	24619.7	24672.4
717.4	32900.2	33279	29261.8	29261.8	29262.1	33054.2	29261.8	29436.7	29421.8	29151.2	29261.8	718.6	36477.7	37177.9	29921.9	29921.9	29932.4	29979.8	30267.9	36763.4	29921.9	713.5	37886.5	38097.7	25099.7	25179.9	25099.7	35728.3	25099.9	27388.5	25099.7	717	47406.2	47485.5	39238.3	39756.2	39496	39238.3	39238.3	40232.1	39442.7	45511.8	39238.3	718.6	30150.6	30317.3	24519.5	24576.1	24623.5
717.3	32958	33247.7	29220.7	29220.7	29220.9	33020.5	29220.7	29414.1	29364.8	29110.2	29220.7	718.5	36216.7	37096	29856.6	29856.6	29864.6	29924.6	30167.7	36708.8	29856.6	713.4	38092.6	38481.9	24993.8	25097.3	24993.8	36171.5	24994.1	27200.5	24993.8	716.9	47221.9	47439.3	39177	39710.2	39427.8	39177	39177	40276.9	39368	45364.2	39177	718.5	30106.8	30282.8	24471.5	24529.4	24571.6
717.2	32865.3	33216.6	29178.5	29178.5	29178.6	32982.9	29178.5	29393	29308	29068	29178.5	718.4	36115.1	37010.2	29792.5	29792.5	29798.6	29872.3	30071.8	36645	29792.5	713.3	37981.4	38874.5	24886.3	25018.8	24886.3	36615	24886.5	27013	24886.3	716.8	47290.8	47403.7	39117.2	39666.4	39361.4	39117.2	39117.2	40335.1	39295.9	45213.3	39117.2	718.4	30598.6	30244.5	24423.4	24482.7	24520
717.1	32878.1	33187.7	29136.8	29136.8	29137	32943.1	29136.8	29375.5	29253.1	29026.4	29136.8	718.3	36381.3	36919.3	29728.6	29728.6	29733.2	29821.9	29979	36571.1	29728.7	713.2	38129.9	39275.4	24778.7	24947.4	24778.7	37057.3	24778.9	26828	24778.7	716.7	47436.5	47376.7	39055.7	39621.8	39293.7	39055.7	39055.7	40404.5	39223.3	45056.3	39055.7	718.3	29757.3	30197.1	24370.8	24431.5	24463.8
717	33079.2	33160.2	29094.6	29094.6	29094.7	32900	29094.6	29360.9	29198.8	28984.1	29094.6	718.2	36745	36821.1	29662.8	29662.8	29666.2	29771.6	29886.7	36484.9	29662.8	713.1	38919.5	39682.7	24669.8	24883	24669.8	37495.2	24669.9	26643.8	24669.8	716.6	46905.9	47358.6	38991.8	39575.3	39223.7	38991.8	38991.8	40485.3	39149.1	44892.3	38991.8	718.2	29782	30151.9	24324.8	24387	24414.6
716.9	32895.7	33132.1	29049.6	29049.6	29049.7	32851.4	29049.6	29347.4	29142.9	28939.2	29049.6	718.1	36722.5	36715.2	29594.2	29594.2	29596.8	29721	29794.2	36385.9	29594.2	713	39520.3	40090.9	24555.8	24823.7	24555.8	37921.7	24556	26457.1	24555.8	716.5	46943.7	47359.2	38933.6	39535.4	39159.6	38933.6	38933.6	40586.7	39081.5	44730.1	38933.6	718.1	29819.3	30101.1	24278.2	24342	24365
716.8	32793.7	33108.3	29006.2	29006.2	29006.3	32801.6	29006.2	29339.9	29089.6	28895.8	29006.2	718	36427.7	36604.2	29525.4	29525.4	29527.3	29672.7	29703.8	36276.8	29525.4	712.9	39676.5	40500.5	24438	24772.3	24438	38335.3	24438	26268.8	24438	716.4	47288.9	47372.8	38874.2	39495.2	39094.6	38874.2	38874.2	40703.1	39013.6	44563	38874.2	718	29699.5	30044.6	24231	24296.4	24314.8
716.7	33094.4	33088.2	28963.5	28963.5	28963.5	32749.7	28963.5	29337.9	29037.9	28853.1	28963.5	717.9	36473.4	36490.3	29458	29458	29459.4	29628.7	29616.8	36159.4	29458	712.8	40481.7	40913.3	24318.5	24733.2	24318.5	38736	24318.6	26081.2	24318.5	716.3	47397	47397.1	38809.8	39451	39024.8	38809.8	38809.8	40831.9	38941.3	44387.2	38809.8	717.9	29523.6	29983.5	24184.3	24251.4	24265.3
716.6	33130.7	33067.8	28916.9	28916.9	28916.9	32691.3	28916.9	29337.5	28983.2	28806.5	28916.9	717.8	35892.8	36371.7	29389.9	29389.9	29390.9	29587.3	29531	36032.2	29389.9	712.7	40990.5	41324.5	24194	24704.9	24194	39116.7	24194.1	25890.8	24194	716.2	46877.4	47436.2	38743.2	39405.6	38953	38743.2	38743.2	40976.8	38867.6	44206.2	38743.2	717.8	29010.1	29918.3	24138.8	24207.6	24217.2
716.5	32960.9	33050.8	28869.4	28869.4	28869.4	32629.2	28869.4	29342.3	28928.4	28759	28869.4	717.7	36260.4	36253.1	29324.9	29324.9	29325.6	29552.8	29450.1	35899.3	29324.9	712.6	41487	41735.6	24066	24691.4	24066	39476.9	24066	25699.2	24066	716.1	47502.2	47499.6	38682.3	39366.8	38887.1	38682.3	38682.3	41147.1	38800.1	44027.7	38682.3	717.7	29233.3	29852.2	24097.2	24167.8	24173.1
716.4	33163.4	33039.9	28823.2	28823.2	28823.2	32565.9	28823.2	29355.1	28875.7	28712.9	28823.2	717.6	36006.3	36129.2	29257.3	29257.3	29257.8	29519.7	29368.2	35755.4	29257.3	712.5	40786.2	42145.8	23934.5	24695.2	23934.5	39813.1	23934.5	25506.4	23934.5	716	47815	47574.4	38612.9	39320.7	38812.8	38612.9	38612.9	41329.5	38724.7	43838.2	38612.9	717.6	29854.7	29778.9	24053.4	24125.9	24126.8
716.3	33324.7	33031.7	28774.3	28774.3	28774.3	32497.1	28774.3	29372.7	28820.8	28664	28774.3	717.5	36010.2	36004.8	29190.8	29190.8	29191.2	29492.2	29288.8	35604.9	29190.8	712.4	41261.1	42561.7	23806.1	24725.4	23806.1	40129.5	23806.2	25319	23806.1	715.9	47551.4	47666	38538.7	39271.1	38733.9	38538.7	38538.7	41529	38645.1	43641.7	38538.7	717.5	29402.4	29695.4	24004	24078.4	24075.1
716.2	33276.5	33027.3	28723	28723.1	28723	32423.4	28723	29396	28764.3	28612.7	28723	717.4	35695.8	35879.2	29123.9	29123.9	29124.2	29469.5	29210.4	35446.8	29123.9	712.3	42362.1	42977	23674.5	24778.3	23674.5	40417.1	23674.5	25130.5	23674.5	715.8	47829.7	47782.9	38466.9	39225.3	38657.5	38466.9	38466.9	41754.1	38568.2	43445.3	38466.9	717.4	29376.9	29611.2	23957.9	24034.4	24026.8
716.1	33050.5	33030	28671.7	28671.8	28671.8	32347.2	28671.7	29428.3	28708.2	28561.5	28671.7	717.3	35517.3	35755.2	29058.5	29058.5	29058.7	29453.8	29134.8	35283.4	29058.5	712.2	43088.9	43387.5	23535.9	24852.7	23535.9	40669.4	23536	24937.2	23535.9	715.7	47972.3	47919.8	38390.7	39176.5	38577	38390.7	38390.7	41998.7	38487.4	43242.9	38390.7	717.3	29823	29523	23911.7	23990.2	23978.5
716	32821.9	33042.4	28622.4	28622.4	28622.4	32270.4	28622.4	29472.4	28654.6	28512.1	28622.4	717.2	35528.1	35633.1	28993.8	28993.8	28993.9	29445	29060.9	35114.7	28993.8	712.1	44175.6	43796	23392.6	24953.5	23392.6	40886.4	23392.6	24741.3	23392.6	715.6	47835.5	48079.7	38311.8	39126.7	38493.9	38311.8	38311.8	42265.8	38404.4	43036.3	38311.8	717.2	29622.8	29427.6	23861.2	23942	23926.1
715.9	32890.1	33065.5	28575	28575.1	28575	32193.2	28575	29529.1	28603.5	28464.8	28575	717.1	34984.7	35512.8	28928.6	28928.6	28928.7	29442.5	28987.6	34939.9	28928.6	712	44069.3	44199.6	23242.5	25080.6	23242.5	41063.4	23242.5	24540.6	23242.5	715.5	48179.9	48267.3	38233.7	39079.3	38411.6	38233.7	38233.7	42559.4	38322.3	42829.3	38233.7	717.1	29363.6	29330.8	23812.1	23895.2	23875
715.8	33104.2	33097.1	28526.4	28526.5	28526.4	32112.3	28526.4	29596.2	28551.5	28416.2	28526.4	717	35489.4	35398.8	28866.4	28866.4	28866.5	29450.3	28918.1	34763.2	28866.4	711.9	44326.6	44605.2	23092.1	25242.8	23092.1	41205	23092.2	24341.7	23092.1	715.4	48878.5	48477.8	38150.3	39028.7	38324.3	38150.3	38150.3	42874.4	38235.4	42616.1	38150.3	717	28523.7	29234	23764.8	23850.2	23825.8
715.7	33236.4	33136.2	28474.8	28474.9	28474.8	32026.3	28474.8	29672.8	28496.9	28364.7	28474.8	716.9	35212.5	35285.9	28800.7	28800.7	28800.8	29462.7	28846	34578.7	28800.7	711.8	44997.3	45010.8	22939.5	25439.8	22939.5	41307.4	22939.5	24142.5	22939.5	715.3	48928.1	48708.3	38057.2	38970.6	38227.3	38057.2	38057.2	43207.4	38139.1	42392.6	38057.2	716.9	28510.2	29143	23724.2	23812.1	23783.5
715.6	33261.2	33185	28421.2	28421.4	28421.2	31935.9	28421.2	29760.9	28440.6	28311	28421.2	716.8	35692.5	35180.1	28736.3	28736.3	28736.3	29485.2	28775.8	34391.7	28736.3	711.7	44631.7	45412.7	22782.3	25670.1	22782.3	41366.5	22782.3	23940.7	22782.3	715.2	48784	48967.2	37962.3	38913.2	38128.7	37962.3	37962.3	43566.3	38041.2	42167	37962.3	716.8	28718.1	29051.5	23683.3	23773.9	23741
715.5	33347.9	33245.4	28366.7	28367	28366.7	31842.5	28366.7	29862.4	28383.7	28256.6	28366.7	716.7	35587.1	35077.9	28668.6	28668.6	28668.6	29513.8	28703	34198.1	28668.6	711.6	45747.1	45816.3	22626.3	25940.5	22626.3	41386.6	22626.3	23741.9	22626.3	715.1	49156.5	49258.4	37868	38859.2	38030.9	37868	37868	43954.3	37944.2	41941.9	37868	716.7	28813.5	28958.6	23640.4	23733.7	23696.5
715.4	33242.4	33317.8	28310.6	28311	28310.6	31745.5	28310.6	29977.7	28325.5	28200.5	28310.6	716.6	35166.5	34984.1	28601	28601	28601	29553.1	28631.1	34002	28601	711.5	45892.1	46211.5	22463.2	26242	22463.2	41358.1	22463.2	23537.9	22463.2	715	49576.2	49575.8	37767.9	38802.7	37927.3	37767.9	37768	44364.8	37841.6	41711.2	37767.9	716.6	28639.8	28866.2	23596.3	23692.4	23650.8
715.3	33268	33405.5	28255.1	28255.6	28255.1	31647.1	28255.1	30110	28268.1	28145	28255.1	716.5	35378.9	34901.9	28535.7	28535.7	28535.7	29605.5	28561.8	33805.9	28535.7	711.4	47282.1	46601.8	22298.5	26579.1	22298.5	41285.8	22298.5	23333.9	22298.5	714.9	50064.7	49919.6	37661.4	38743.3	37817.5	37661.4	37661.4	44797.4	37732.7	41474.5	37661.4	716.5	28836.2	28777.6	23553.2	23652.4	23606.3
715.2	33858.9	33507.8	28198.7	28199.4	28198.7	31545.9	28198.7	30258.5	28210	28088.6	28198.7	716.4	35580.5	34828.7	28468.6	28468.6	28468.6	29668.2	28491.3	33606.5	28468.6	711.3	46579.9	46978.1	22125.1	26943.4	22125.1	41161.9	22125.1	23123	22125.1	714.8	50738	50289.8	37547.6	38680.9	37700.3	37547.6	37547.6	45251.2	37616.6	41231	37547.6	716.4	28493.5	28690.8	23508.2	23610.4	23559.8
715.1	34013.9	33619.7	28135	28136.1	28135	31435.6	28135	30418.2	28144.9	28025	28135	716.3	35526.5	34765.8	28399.9	28399.9	28399.9	29742.1	28419.6	33404	28399.9	711.2	47293.7	47348	21954.6	27342.8	21954.6	40997.7	21954.6	22916.7	21954.6	714.7	50620.3	50683.8	37423.9	38613.6	37573.5	37423.9	37423.9	45722.7	37491	40978.7	37423.9	716.3	28321.4	28611.5	23465.7	23571.2	23515.9
715	33701.1	33746.6	28068.9	28070.4	28068.9	31321.2	28068.9	30594.2	28077.6	27959	28068.9	716.2	35360.3	34716	28331.1	28331.1	28331.1	29829.4	28348.1	33200.7	28331.1	711.1	47487.2	47700.2	21779.2	27766.3	21779.2	40785.3	21779.2	22707	21779.2	714.6	51408.5	51112.4	37300.2	38551.9	37446.7	37300.2	37300.2	46221.7	37365.4	40727.4	37300.2	716.2	28447.3	28539.4	23424.2	23533.2	23473.2
714.9	34106.2	33894.7	28005.6	28007.7	28005.6	31207.9	28005.6	30792.7	28013.1	27895.7	28005.6	716.1	35621.9	34681.1	28262.9	28262.9	28262.9	29931.9	28277.6	32997.5	28262.9	711	47729.7	48032.2	21601.8	28211.1	21601.8	40527.9	21601.8	22496.9	21601.8	714.5	51835.1	51563.7	37165.1	38485.5	37308.7	37165.1	37165.1	46735.3	37228.6	40466.1	37165.1	716.1	28485.8	28473.2	23381.4	23493.9	23429.1
714.8	34501.1	34057	27937	27939.9	27937	31087.9	27937	31006.7	27943.6	27827.1	27937	716	35940.7	34659.7	28192.7	28192.7	28192.7	30047.5	28205.3	32792.3	28192.7	710.9	48436	48338.6	21422.1	28671.2	21422.1	40225.6	21422.1	22285.9	21422.1	714.4	51876.7	52042.5	37023.1	38419.9	37163.8	37023.1	37023.1	47266.9	37084.9	40199.4	37023.1	716	29211.6	28415	23337.8	23454.2	23384.3
714.7	34550.5	34234.2	27863.3	27867.3	27863.3	30961.3	27863.3	31236.4	27869	27753.4	27863.3	715.9	35434.1	34652.7	28120.1	28120.1	28120.1	30176.9	28131	32584.9	28120.1	710.8	48728.6	48610.8	21237.5	29137.6	21237.5	39876.7	21237.5	22071.5	21237.5	714.3	52921.8	52554	36878.8	38361.1	37016.7	36878.8	36878.8	47820.3	36939.1	39932	36878.8	715.9	29039.7	28360.1	23287.7	23408	23333
714.6	34672.1	34430.9	27788.2	27793.8	27788.2	30832	27788.2	31486.6	27793.1	27678.4	27788.2	715.8	35981.8	34666.1	28050.1	28050.1	28050.1	30326	28059.5	32380.8	28050.1	710.7	48943.6	48843.9	21050.2	29603.9	21050.2	39484.8	21050.2	21855.7	21050.2	714.2	53325.9	53084.6	36719.8	38297.9	36854.9	36719.8	36719.8	48380.3	36778.6	39651.8	36719.8	715.8	29491.1	28317.6	23238.7	23363.2	23282.9
714.5	34872.5	34646.7	27710.9	27718.5	27710.9	30699.2	27710.9	31756.3	27715.1	27601.1	27710.9	715.7	35710.4	34694.6	27976.4	27976.4	27976.4	30489	27984.4	32173.9	27976.4	710.6	49272.4	49031.6	20860.7	30062.8	20860.7	39051.2	20860.7	21639	20860.7	714.1	54100.8	53642.8	36553.7	38240.1	36686.3	36553.7	36553.7	48953.6	36611.2	39366.6	36553.7	715.7	28908.8	28283.4	23185.3	23314.2	23228.4
714.4	35134.2	34881.2	27630.5	27640.8	27630.5	30562.3	27630.5	32045.2	27634.2	27520.7	27630.5	715.6	35365	34744.1	27903.8	27903.8	27903.8	30671.8	27910.7	31969.2	27903.8	710.5	50325.4	49165.3	20668.3	30503.7	20668.3	38577.4	20668.3	21420.8	20668.3	714	54720.6	54222.9	36376	38184.7	36506	36376	36376	49532.1	36432.2	39072	36376	715.6	28563.8	28267.8	23136.5	23270	23178.6
714.3	35009.1	35134.4	27546.3	27560.3	27546.3	30420.5	27546.3	32352.8	27549.4	27436.5	27546.3	715.5	35379.9	34816.1	27833	27833	27833	30875.4	27838.9	31767.8	27833	710.4	50359.3	49233.4	20469	30913.7	20469	38061	20469	21196.8	20469	713.9	55365.6	54826.8	36188.4	38135.7	36315.9	36188.4	36188.4	50115.6	36243.4	38769.8	36188.4	715.5	28949.1	28270.1	23090.2	23228.6	23131.3
714.2	35388.7	35410.3	27462.5	27481.3	27462.5	30278.3	27462.5	32682.7	27465.2	27352.8	27462.5	715.4	35472	34909.1	27761.6	27761.6	27761.6	31098.2	27766.6	31567.5	27761.6	710.3	50226.1	49234.2	20268.5	31289.1	20268.5	37509.4	20268.5	20972.7	20268.5	713.8	56056.2	55454.1	35990.5	38095.4	36115.6	35990.5	35990.5	50701.2	36044.4	38459.6	35990.5	715.4	28425.8	28285.5	23040.2	23183.8	23080.3
714.1	35773.9	35703.9	27373.6	27398.7	27373.6	30130	27373.6	33029.7	27375.9	27263.9	27373.6	715.3	36185.6	35023.6	27689.2	27689.2	27689.2	31340.5	27693.5	31367.9	27689.2	710.2	49745.1	49161.1	20067.5	31620.5	20067.5	36926.3	20067.5	20749.3	20067.5	713.7	56689.6	56103.1	35781.5	38065.6	35904.2	35781.5	35781.5	51284	35834.3	38141	35781.5	715.3	28649.3	28323.3	22994.3	23143.3	23033.5
714	36266.9	36014.6	27279.4	27312.7	27279.4	29975.8	27279.4	33392.4	27281.4	27169.8	27279.4	715.2	36274.4	35156	27612	27612	27612	31598.7	27615.6	31165.6	27612	710.1	49529.5	49009.3	19868.1	31901.6	19868.1	36315.5	19868.1	20528.5	19868.1	713.6	56927.4	56774.9	35562.1	38050	35682.6	35562.1	35562.1	51862.3	35613.9	37814.5	35562.1	715.2	28706.6	28378.2	22946.1	23100.9	22984.3
713.9	36516.4	36341.1	27178.6	27222.5	27178.6	29814.5	27178.6	33769.2	27180.3	27069	27178.6	715.1	36249.3	35311.1	27533.8	27533.8	27533.8	31877.2	27536.8	30964.5	27533.8	710	48917.9	48771.4	19668.8	32121.7	19668.8	35678.6	19668.8	20308.8	19668.8	713.5	57549.2	57472.9	35337	38056.6	35455.2	35337	35337	52436.3	35387.8	37485.2	35337	715.1	29592.8	28453.2	22896.9	23057.8	22934.3
713.8	36770	36686.2	27073.9	27131.3	27073.9	29648.6	27073.9	34162.2	27075.4	26964.4	27073.9	715	37335.7	35489.6	27455.2	27455.3	27455.2	32176.7	27457.8	30765.4	27455.2	709.9	48664.2	48444.7	19471.8	32275.7	19471.8	35020.3	19471.8	20092.4	19471.8	713.4	58340.5	58192.7	35101.4	38084	35217.5	35101.4	35101.4	52997.6	35151.3	37148.1	35101.4	715	29428.4	28542.3	22839.8	23007.2	22876.3
713.7	37389.2	37048.9	26965.2	27039.9	26965.2	29478.5	26965.2	34569.3	26966.5	26855.8	26965.2	714.9	36784.5	35685.1	27369.5	27369.6	27369.5	32490.5	27371.7	30561.7	27369.5	709.8	48272.1	48023.1	19275.1	32355.2	19275.1	34340.9	19275.1	19877.1	19275.1	713.3	58771.4	58932.2	34853.1	38133.9	34967.1	34853.1	34853.1	53540.5	34902.1	36801.2	34853.1	714.9	29870.8	28655.7	22783.6	22957.8	22819.3
713.6	37785.4	37425.1	26848.5	26944.9	26848.5	29299.8	26848.5	34985.7	26849.5	26739	26848.5	714.8	36459.1	35907.8	27286.6	27286.8	27286.6	32828.9	27288.5	30363.3	27286.6	709.7	47617.2	47505.3	19079.5	32355.7	19079.5	33644.8	19079.5	19663.9	19079.5	713.2	59248.6	59694.2	34596.3	38214	34708.2	34596.3	34596.3	54064.1	34644.4	36448.8	34596.3	714.8	29735	28789.5	22723.2	22904.7	22758.1
713.5	37943.4	37816	26725.9	26849.6	26725.9	29115.3	26725.9	35411.4	26726.8	26616.5	26725.9	714.7	36656.6	36155.9	27205.2	27205.6	27205.2	33189.9	27206.8	30169.2	27205.2	709.6	47199.1	46891.4	18886.4	32274.8	18886.4	32935.5	18886.4	19453.9	18886.4	713.1	60318.2	60478.8	34330.5	38328.1	34440.4	34330.5	34330.5	54564.4	34377.7	36090.1	34330.5	714.7	30472.9	28949.4	22663.4	22852.6	22697.5
713.4	38275	38223.8	26600.3	26758	26600.3	28927.5	26600.3	35847.5	26601.1	26490.9	26600.3	714.6	36849.7	36426.5	27122.1	27122.7	27122.1	33570.5	27123.5	29976.1	27122.1	709.5	45772.8	46181.3	18694.6	32109.1	18694.6	32215.2	18694.6	19246.1	18694.6	713	60918.8	61276.8	34048.1	38471.9	34156	34048.1	34048.1	55028.5	34094.5	35718	34048.1	714.6	29915.7	29129.1	22596.7	22794.3	22630.2
713.3	38852.4	38646.1	26469.5	26669.2	26469.5	28734.5	26469.5	36290.2	26470.2	26360.2	26469.5	714.5	36893.1	36718.6	27037.3	27038.2	27037.3	33969.7	27038.5	29784.3	27037.3	709.4	45355.4	45382.5	18509.6	31863.8	18509.6	31492.2	18509.6	19045.8	18509.6	712.9	61687.9	62093.5	33754.7	38655.2	33860.7	33754.7	33754.7	55457.9	33800.3	35337.9	33754.7	714.5	30530	29340	22534.3	22740.7	22567
713.2	39553.2	39078.7	26330.9	26582	26330.9	28533.7	26330.9	36733.4	26331.4	26221.6	26330.9	714.4	37511.5	37032.9	26951.8	26953.1	26951.8	34387.9	26952.7	29594.5	26951.8	709.3	44067.5	44493.1	18325.9	31534.3	18325.9	30763.1	18325.9	18847.5	18325.9	712.8	62633	62926.6	33448.1	38879.6	33552.3	33448.1	33448.1	55846.4	33493	34947.6	33448.1	714.4	30181.6	29572.8	22466.1	22681.8	22498.1
713.1	39382	39520	26182.9	26496.7	26182.9	28323.7	26182.9	37174.1	26183.3	26073.6	26182.9	714.3	37646.2	37365.2	26861.9	26863.8	26861.9	34821.1	26862.7	29403.3	26861.9	709.2	42550.4	43524.2	18148.3	31128.5	18148.3	30036.3	18148.3	18655.9	18148.3	712.7	63709.2	63770.8	33126	39145.2	33228.4	33126	33126	56186.1	33170.2	34544.8	33126	714.3	31120.2	29836.5	22400.3	22626.1	22431.6
713	39463.2	39978	26035.1	26424.7	26035.1	28114.2	26035.1	37618	26035.5	25925.9	26035.1	714.2	37811.5	37717.1	26770.6	26773.3	26770.6	35270.5	26771.2	29213.8	26770.6	709.1	42012.1	42483	17978.1	30651.7	17978.1	29315.1	17978.1	18472.4	17978.1	712.6	63817	64624	32786.5	39453.6	32887.2	32786.5	32786.5	56471.6	32830	34127.7	32786.5	714.2	30921.5	30119.7	22325.9	22562.5	22356.6
712.9	40456.3	40449.3	25884.8	26365.3	25884.8	27902.5	25884.8	38059.9	25885.1	25775.7	25884.8	714.1	38039.7	38087.8	26677.7	26681.7	26677.7	35735.3	26678.3	29025.7	26677.7	709	40310	41373.5	17810	30104.7	17810	28597.2	17810	18291.6	17810	712.5	65071.4	65494.3	32441.5	39818	32540.5	32441.5	32441.5	56709.5	32484.4	33708	32441.5	714.1	31321.6	30432.5	22252.6	22500.7	22282.7
712.8	41136.2	40923.2	25721.7	26310.4	25721.7	27678.4	25721.7	38486.6	25722	25612.6	25721.7	714	38373.6	38474.9	26582.9	26588.6	26582.9	36213	26583.4	28838.7	26582.9	708.9	38898.1	40210.9	17650.4	29500.7	17650.4	27891.1	17650.4	18119.8	17650.4	712.4	65627.8	66365.2	32076.7	40225.8	32174	32076.7	32076.7	56881.7	32118.8	33271.5	32076.7	714	31603	30769.1	22175.2	22435.8	22204.7
712.7	41375.3	41401.3	25549.2	26265.8	25549.2	27445.3	25549.2	38897.5	25549.5	25440.2	25549.2	713.9	38516.4	38876.6	26485.4	26493.5	26485.4	36701.6	26485.8	28652	26485.4	708.8	37276.7	39003.3	17497.7	28845.8	17497.7	27197.3	17497.7	17955.5	17497.7	712.3	66725.7	67242.1	31700.4	40686.2	31796.1	31700.4	31700.4	56993	31741.9	32826.5	31700.4	713.9	32026	31130	22094.8	22368.7	22123.7
712.6	41846	41888.3	25372.2	26238.6	25372.2	27208.2	25372.2	39294.6	25372.4	25263.2	25372.2	713.8	39169.5	39292.8	26386.5	26397.8	26386.5	37200.8	26386.8	28466.9	26386.5	708.7	36267.4	37763.9	17353.1	28150.7	17353.1	26519.6	17353.1	17799.9	17353.1	712.2	68052.3	68112.4	31305.8	41190.9	31400	31305.8	31305.8	57032	31346.8	32366.1	31305.8	713.8	31707.2	31513.6	22010.1	22298.4	22038.4
712.5	42486.3	42379.6	25187.9	26228.5	25187.9	26964.5	25187.9	39671.1	25188.1	25079	25187.9	713.7	38953.1	39717.9	26282.9	26298.7	26282.9	37704.6	26283.2	28280.2	26282.9	708.6	35135.9	36499.2	17213.3	27420.5	17213.3	25856	17213.3	17649.5	17213.3	712.1	69345.9	68969	30889.9	41735.8	30982.5	30889.9	30889.9	56992.9	30930.2	31887.2	30889.9	713.7	32373.4	31924.3	21927.4	22231.2	21955.1
712.4	42782.9	42872.5	24994.4	26236.1	24994.4	26712.3	24994.4	40021.6	24994.5	24885.5	24994.4	713.6	38658.1	40156.2	26180.1	26202	26180.1	38216.9	26180.3	28097.2	26180.1	708.5	34311.5	35222.7	17079.1	26666.3	17079.1	25209.6	17079.1	17505	17079.1	712	69412	69804.3	30452.8	42316.8	30543.8	30452.8	30452.8	56872.3	30492.5	31389.9	30452.8	713.6	32418.6	32353	21838.3	22158.9	21865.5
712.3	43278.1	43369.9	24795.4	26267.5	24795.4	26455.3	24795.4	40346.6	24795.6	24686.6	24795.4	713.5	39131	40605.3	26078.4	26108.4	26078.4	38735.2	26078.5	27918.3	26078.4	708.4	33503.6	33943.1	16948.6	25895.6	16948.6	24580	16948.6	17364.8	16948.6	711.9	70527.5	70626.6	30009.4	42944.7	30099	30009.4	30009.4	56682.8	30048.5	30889.2	30009.4	713.5	32154.8	32802.5	21748	22086.9	21774.7
712.2	43809.5	43867.1	24588.7	26322.3	24588.7	26191.4	24588.7	40639.6	24588.8	24480	24588.7	713.4	39983.8	41059	25973.2	26014.1	25973.2	39252.3	25973.3	27738.8	25973.2	708.3	33003.6	32670.4	16821.9	25117.2	16821.9	23968.2	16821.9	17228.8	16821.9	711.8	71606.8	71415.1	29546.7	43600.7	29634.8	29546.7	29546.7	56409.3	29585.3	30371.7	29546.7	713.4	32631.6	33273.8	21659.3	22017.9	21685.4
712.1	44237.2	44362.9	24373.8	26402	24373.8	25920.1	24373.8	40897	24373.9	24265.1	24373.8	713.3	40700.4	41513.4	25862	25917.4	25862	39763.7	25862.2	27556.3	25862	708.2	31992.6	31414.2	16697.3	24339.2	16697.3	23374.4	16697.3	17095.2	16697.3	711.7	71904.1	72158.4	29064.8	44275.4	29151.6	29064.8	29064.8	56050.1	29102.9	29837.8	29064.8	713.3	33364.5	33758.6	21565.7	21945.8	21591.3
712	44691.2	44855.3	24151.7	26508.8	24151.7	25642.5	24151.7	41116	24151.8	24043	24151.7	713.2	40625.5	41966.6	25745.8	25820	25745.8	40266.6	25746	27371.5	25745.8	708.1	31246.3	30185.5	16577.6	23571.8	16577.6	22801.9	16577.6	16966.8	16577.6	711.6	72231.5	72856.4	28573.3	44969.5	28658.7	28573.3	28573.3	55613.8	28610.8	29296.8	28573.3	713.2	34092.6	34251.3	21465	21868.7	21490.2
711.9	44945.5	45342.2	23922	26643.4	23922	25358.4	23922	41293	23922.1	23813.4	23922	713.1	41299.4	42422.3	25629.4	25728	25629.4	40763.7	25629.5	27189.3	25629.4	708	30623.5	28992.3	16461.3	22822	16461.3	22250.6	16461.3	16842.3	16461.3	711.5	73200.7	73494.2	28071.6	45668.9	28155.7	28071.6	28071.6	55099.4	28108.6	28748.2	28071.6	713.1	33677.7	34749.8	21357.3	21786.7	21382
711.8	45190.1	45823.2	23687	26808.5	23687	25069.8	23687	41427.3	23687	23578.4	23687	713	41988.4	42873.5	25508.1	25638.2	25508.1	41246.5	25508.2	27004.9	25508.1	707.9	29017.3	27840.5	16347.9	22095	16347.9	21720.3	16347.9	16720.9	16347.9	711.4	73817.6	74050	27551.7	46351.6	27634.5	27551.7	27551.7	54498.9	27588.2	28183.7	27551.7	713	34168.4	35260	21252.2	21709.8	21276.5
711.7	45667.8	46294.2	23446.6	27003.3	23446.6	24776.9	23446.6	41515.5	23446.6	23338.1	23446.6	712.9	42198.2	43319	25381.8	25552	25381.8	41712.2	25381.9	26818.2	25381.8	707.8	28695.4	26741.2	16242.7	21401.8	16242.7	21216.7	16242.7	16608.1	16242.7	711.3	74090.7	74512.1	27017.7	47005.5	27099.2	27017.7	27017.7	53817.1	27053.6	27607.4	27017.7	712.9	35009.7	35771.2	21142	21630.7	21165.8
711.6	46358.9	46749.5	23198.2	27224.5	23198.2	24477	23198.2	41552.6	23198.2	23089.7	23198.2	712.8	42391.6	43760.7	25253.5	25474.4	25253.5	42161	25253.5	26632.1	25253.5	707.7	26711.2	25693.4	16138.7	20740.3	16138.7	20733.6	16138.7	16496.8	16138.7	711.2	74415.2	74865.2	26473.6	47613.8	26553.9	26473.6	26473.6	53059.5	26509.1	27023.5	26473.6	712.8	34575.7	36277.3	21023.8	21546.6	21047.1
711.5	47010.2	47181.4	22939.3	27466.9	22939.3	24167.8	22939.3	41533.6	22939.3	22830.9	22939.3	712.7	43066.7	44197.1	25123.1	25407.6	25123.1	42589.2	25123.2	26446.5	25123.1	707.6	26129.2	24708.7	16045.1	20122.8	16045.1	20280	16045.1	16396.1	16045.1	711.1	74934.7	75089.8	25918.8	48155.6	25997.8	25918.8	25918.8	52226.9	25953.8	26430.9	25918.8	712.7	35873.5	36784.7	20908.2	21469	20931.1
711.4	47422.3	47585.6	22670.2	27728	22670.2	23849.6	22670.2	41456.7	22670.2	22561.9	22670.2	712.6	43185.2	44625.1	24987.8	25351.2	24987.8	42991.2	24987.9	26258.4	24987.8	707.5	25322.3	23783.2	15954.3	19544.7	15954.3	19848.6	15954.3	16298.5	15954.3	711	75791.7	75160.9	25350.7	48603.3	25428.5	25350.7	25350.7	51319.4	25385.2	25827.2	25350.7	712.6	36041.4	37275.9	20780.5	21383.5	20803
711.3	47921.8	47959.5	22393.6	28006.9	22393.6	23524.8	22393.6	41323.1	22393.6	22285.3	22393.6	712.5	44098.5	45047.2	24851	25311.3	24851	43366.8	24851	26071.1	24851	707.4	24655.2	22919	15867.4	19008.4	15867.4	19440.5	15867.4	16205	15867.4	710.9	75932.1	75052.4	24764.8	48928.3	24841.5	24764.8	24764.8	50335.2	24798.9	25207.7	24764.8	712.5	36451.1	37756.1	20650.3	21300.5	20672.5
711.2	48227	48295	22108.2	28296.9	22108.2	23192.7	22108.2	41130.1	22108.3	22000.1	22108.2	712.4	44594.4	45458.8	24707.7	25286.2	24707.7	43708.4	24707.7	25879.7	24707.7	707.3	22383.5	22115.5	15783.7	18513.6	15783.7	19054.4	15783.7	16114.9	15783.7	710.8	75713.5	74751.1	24170	49114.7	24245.5	24170	24170	49286	24203.6	24581.3	24170	712.4	37326.1	38220.1	20515.5	21218.6	20537.3
711.1	48382.4	48588.3	21816.3	28594.7	21816.3	22855	21816.3	40879.3	21816.4	21708.2	21816.3	712.3	45032.4	45863.1	24560.5	25281.6	24560.5	44015.9	24560.5	25686.6	24560.5	707.2	21681.2	21382	15712.2	18069.7	15712.2	18699.4	15712.2	16037.2	15712.2	710.7	74968.1	74240.7	23570.5	49141.8	23644.9	23570.5	23570.5	48180.2	23603.6	23952	23570.5	712.3	36922.5	38660.8	20372.2	21135.1	20393.5
711	48556.7	48833.1	21519.5	28894.6	21519.5	22513.7	21519.5	40571.8	21519.5	21411.4	21519.5	712.2	45558.7	46260.4	24409.7	25301.4	24409.7	44286.3	24409.7	25492	24409.7	707.1	19914.3	20707.8	15644.1	17666.7	15644.1	18366.1	15644.1	15963.2	15644.1	710.6	74966.4	73510.5	22972.8	48996.2	23046.1	22972.8	22972.8	47027.4	23005.5	23326.4	22972.8	712.2	37817.5	39085.7	20231	21062.1	20252
710.9	48789	49022	21217.3	29189	21217.3	22168.3	21217.3	40207.4	21217.3	21109.3	21217.3	712.1	45985.5	46651.5	24254.7	25348.5	24254.7	44517	24254.7	25295.4	24254.7	707	18816.3	20097.9	15585.4	17309.8	15585.4	18060.2	15585.4	15898.8	15585.4	710.5	74016.7	72539.5	22367.7	48651.9	22440	22367.7	22367.7	45823.3	22400	22695.1	22367.7	712.1	38720	39481.9	20081	20990.5	20101.6
710.8	48954.1	49147.1	20909.2	29469.5	20909.2	21818.1	20909.2	39785.9	20909.2	20801.3	20909.2	712	45574.7	47037.6	24096.1	25427	24096.1	44705.6	24096.1	25097.2	24096.1	706.9	18540.5	19545.8	15532.5	16993.1	15532.5	17777.5	15532.5	15840.4	15532.5	710.4	72471.4	71333.8	21766.9	48111.3	21838.1	21766.9	21766.9	44583.4	21798.7	22069.7	21766.9	712	38494.5	39846.7	19922	20922.2	19942.3
710.7	49454.7	49200.9	20595.8	29727.3	20595.8	21463.9	20595.8	39309.2	20595.8	20488	20595.8	711.9	46367.5	47425	23939.1	25545.4	23939.1	44855.4	23939.1	24902.4	23939.1	706.8	17918	19044	15480.9	16709.9	15480.9	17512.6	15480.9	15783.3	15480.9	710.3	71506.5	69902.4	21177.8	47379.3	21248	21177.8	21177.8	43319.3	21209.2	21457.6	21177.8	711.9	40277.9	40189.3	19763.5	20870	19783.5
710.6	49769.5	49172.4	20273.3	29950.5	20273.3	21101.8	20273.3	38774.6	20273.4	20165.5	20273.3	711.8	46938.8	47807.8	23776.3	25699.5	23776.3	44957.1	23776.3	24703.7	23776.3	706.7	17133.3	18591.9	15432.4	16460	15432.4	17267	15432.4	15729.6	15432.4	710.2	69379.3	68249	20593.3	46454.5	20662.5	20593.3	20593.3	42029.2	20624.4	20851.6	20593.3	711.8	39849.4	40492.8	19588.6	20820.3	19608.2
710.5	49900	49056.3	19943.8	30131.5	19943.8	20733.9	19943.8	38186.2	19943.8	19836	19943.8	711.7	47385.1	48187.4	23608.9	25893	23608.9	45010	23608.9	24502.2	23608.9	706.6	17093.6	18186.5	15388	16241.6	15388	17040.8	15388	15680.1	15388	710.1	67506.7	66403.8	20028	45363.5	20096.2	20028	20028	40731.2	20058.7	20266.2	20028	711.7	40142.3	40776.8	19415.7	20796.5	19435
710.4	49666.7	48848.2	19609.1	30263.9	19609.1	20362	19609.1	37548	19609.1	19501.4	19609.1	711.6	48145.7	48565.5	23437.8	26128.8	23437.8	45013.7	23437.8	24298.6	23437.8	706.5	17105.4	17821	15343.5	16048.1	15343.5	16829.3	15343.5	15630.7	15343.5	710	64791	64388	19478.9	44122.1	19546.2	19478.9	19478.9	39427.8	19509.2	19698.4	19478.9	711.6	41618.8	41038.2	19238.9	20798.2	19257.9
710.3	49180.8	48546.1	19273.2	30343.5	19273.2	19990.3	19273.2	36866.4	19273.2	19165.6	19273.2	711.5	47514.4	48939.5	23260.9	26405.6	23260.9	44964.8	23260.9	24091	23260.9	706.4	16578.8	17491.5	15298.8	15876.6	15298.8	16631.3	15298.8	15581.2	15298.8	709.9	61825.1	62238.6	18956.7	42763.1	19023.1	18956.7	18956.7	38133.9	18986.7	19158.8	18956.7	711.5	41563.5	41270.4	19048	20821.6	19066.7
710.2	48571	48148.3	18939	30365.2	18939	19621.4	18939	36147.3	18939	18831.5	18939	711.4	49010.7	49317.2	23086.9	26732.1	23086.9	44871.2	23086.9	23887.6	23086.9	706.3	16166.3	17197.5	15256.7	15727.4	15256.7	16449	15256.7	15534.5	15256.7	709.8	58506.2	59986.5	18464.9	41313.9	18530.3	18464.9	18464.9	36856.8	18494.4	18650.6	18464.9	711.4	41560.8	41492.1	18856	20887.2	18874.3
710.1	48417.1	47652.3	18608	30324.1	18608	19256.8	18608	35394.7	18608	18500.5	18608	711.3	49490.5	49684.2	22902.5	27094.5	22902.5	44719.3	22902.5	23675.5	22902.5	706.2	16208.7	16935.5	15216.6	15597.7	15216.6	16281.1	15216.6	15489.9	15216.6	709.7	56026.7	57668.3	18008.1	39805.6	18072.6	18008.1	18008.1	35606.5	18037.2	18178.7	18008.1	711.3	41810.2	41709.6	18662.3	21003.2	18680.4
710	47818.8	47051	18274.9	30209.3	18274.9	18891.5	18274.9	34607.4	18274.9	18167.5	18274.9	711.2	49709.9	50042.9	22714.1	27495.5	22714.1	44514.9	22714.1	23460.7	22714.1	706.1	16226	16699.7	15176.1	15482.6	15176.1	16124.3	15176.1	15445	15176.1	709.6	53529.4	55300.2	17576.4	38251.4	17640	17576.4	17576.4	34376.1	17605.2	17732.9	17576.4	711.2	41916.5	41927.8	18464.9	21175.8	18482.7
709.9	46312.1	46348.4	17944.8	30021.6	17944.8	18530.3	17944.8	33793.4	17944.8	17837.5	17944.8	711.1	50181.2	50391.7	22523.2	27933.6	22523.2	44259.9	22523.2	23244.7	22523.2	706	15992.9	16487.5	15135.3	15380.3	15135.3	15978	15135.3	15399.9	15135.3	709.5	50891.3	52912	17170.3	36676.2	17233.1	17170.3	17170.3	33171.3	17198.7	17313.8	17170.3	711.1	43017.1	42156.5	18264.8	21415.4	18282.3
709.8	44721.5	45555.2	17627.8	29768.5	17627.8	18183.3	17627.8	32966.2	17627.8	17520.5	17627.8	711	51900.8	50723.1	22328.2	28400.6	22328.2	43953	22328.2	23025.9	22328.2	705.9	15989.5	16297.7	15095.6	15290.1	15095.6	15842.8	15095.6	15356	15095.6	709.4	48095	50529.1	16791.9	35102.2	16853.8	16791.9	16791.9	31997.3	16820	16923.4	16791.9	711	42937.9	42394.2	18053.7	21720.7	18070.9
709.7	43531.5	44675.2	17325	29449.7	17325	17851.8	17325	32130.9	17325	17217.8	17325	710.9	51952.1	51023.1	22121.5	28882.1	22121.5	43587.4	22121.5	22796.5	22121.5	705.8	15731.8	16126.4	15055.6	15209	15055.6	15716.6	15055.6	15312	15055.6	709.3	45946.5	48174.3	16443.5	33549.2	16504.6	16443.5	16443.5	30859.5	16471.3	16563.8	16443.5	710.9	43074.3	42657.4	17841.4	22107.7	17858.4
709.6	42438.1	43707.5	17032.1	29061.2	17032.1	17531.2	17032.1	31286.4	17032.1	16925	17032.1	710.8	52005.6	51294.5	21913.1	29380	21913.1	43174	21913.1	22566.7	21913.1	705.7	15028.5	15973	15016.9	15137.1	15016.9	15600.3	15016.9	15269.3	15016.9	709.2	43867.6	45861.8	16117.5	32027	16177.8	16117.5	16117.5	29754.5	16144.9	16227.4	16117.5	710.8	43803.8	42947.2	17626.2	22577	17642.9
709.5	41281.2	42657.3	16748.2	28604.1	16748.2	17220.7	16748.2	30435.9	16748.2	16641.2	16748.2	710.7	51683.4	51527.8	21703.2	29883.3	21703.2	42714.6	21703.2	22336.4	21703.2	705.6	14639	15837.9	14981.8	15075.4	14981.8	15495.6	14981.8	15230.4	14981.8	709.1	42634	43605	15813.2	30547.3	15872.7	15813.2	15813.2	28683.9	15840.3	15913.6	15813.2	710.7	44311.5	43254.1	17402.9	23117.7	17419.3
709.4	39510.7	41532.1	16474	28082.4	16474	16921.1	16474	29583.5	16474	16367	16474	710.6	52781	51716.2	21493.9	30383.7	21493.9	42212.6	21493.9	22107.8	21493.9	705.5	15112.5	15717.5	14948.7	15021.1	14948.7	15400.2	14948.7	15193.5	14948.7	709	41168.3	41410.4	15520.4	29112.6	15579.1	15520.4	15520.4	27641.1	15547.2	15612	15520.4	710.6	43767	43565.9	17173.4	23715.9	17189.6
709.3	37938.6	40346.4	16216.5	27507.7	16216.5	16639.1	16216.5	28739.4	16216.5	16109.6	16216.5	710.5	53040.5	51840	21276.6	30859.6	21276.6	41661.6	21276.6	21872	21276.6	705.4	15270.6	15605.5	14912.8	14968.5	14912.8	15308.6	14912.8	15154	14912.8	708.9	39354	39291.5	15242.2	27734.6	15300.1	15242.2	15242.2	26631.2	15268.6	15325.6	15242.2	710.5	44265	43858.9	16946.5	24345.3	16962.5
709.2	36694.8	39108.8	15973.6	26884.4	15973.6	16372.9	15973.6	27905.6	15973.6	15866.8	15973.6	710.4	52532.6	51893.9	21056.4	31303.6	21056.4	41068.7	21056.4	21634.3	21056.4	705.3	15064.6	15502.1	14875.8	14918.4	14875.8	15222	14875.8	15113.4	14875.8	708.8	38474.6	37261.4	14983	26424.5	15040.2	14983	14983	25660.5	15009.2	15059	14983	710.4	43986.7	44069.5	16713.5	24940	16729.2
709.1	35516.1	37824.9	15742	26215.5	15742	16118.9	15742	27081.2	15742	15635.2	15742	710.3	52042.6	51871.8	20838	31707.7	20838	40440.7	20838	21399.2	20838	705.2	14812.8	15408.3	14839.8	14872	14839.8	15141.9	14839.8	15073.9	14839.8	708.7	37119.6	35318.4	14731.5	25178	14788	14731.5	14731.5	24720.4	14757.4	14800.7	14731.5	710.3	43414.8	44124.8	16480.8	25424.1	16496.3
709	34840.9	36506.4	15520.8	25508.8	15520.8	15876.5	15520.8	26269.4	15520.8	15414.2	15520.8	710.2	51752.4	51763	20621.2	32058.2	20621.2	39780.5	20621.2	21166.7	20621.2	705.1	14879.8	15323	14804.9	14829.2	14804.9	15068	14804.9	15035.6	14804.9	708.6	35532.4	33472.2	14493.8	24004	14549.5	14493.8	14493.8	23817.8	14519.3	14556.6	14493.8	710.2	43155.3	43933.4	16251.1	25702.6	16266.4
708.9	33882.8	35158.5	15304.8	24767.2	15304.8	15640	15304.8	25467.3	15304.8	15198.2	15304.8	710.1	52462	51556.9	20404.8	32342.3	20404.8	39089	20404.8	20935.2	20404.8	705	14769.5	15243.6	14769.5	14787.7	14769.5	14998	14769.5	14996.9	14769.5	708.5	33917.8	31731.8	14272.7	22909.4	14327.8	14272.7	14272.7	22957.9	14298	14329.8	14272.7	710.1	43122.1	43411.3	16021.6	25688.3	16036.6
708.8	32856.2	33795.2	15097	24002.3	15097	15412.8	15097	24680.6	15097	14990.5	15097	710	51701.5	51239.1	20182.8	32542.2	20182.8	38363.6	20182.8	20698.9	20182.8	704.9	14552									708.4	32735.7	30099.2	14069	21895.3	14123.3	14069	14069	22141.8	14094	14120.7	14069	710	41511.8	42520.6	15790.4	25338.8	15805.3
708.7	32163.6	32430.4	14898.4	23224.6	14898.4	15195.6	14898.4	23913.3	14898.4	14792	14898.4	709.9	51410.9	50811.7	19964.1	32657.5	19964.1	37616	19964.1	20466.5	19964.1	704.8	14786.6									708.3	31000.7	28569.4	13877.4	20956.6	13931	13877.4	13877.4	21365	13902.1	13924.2	13877.4	709.9	41453.8	41301.1	15571	24690.1	15585.6
708.6	31251	31070	14705.3	22438.5	14705.3	14984.9	14705.3	23163.4	14705.3	14598.9	14705.3	709.8	50765.2	50267	19745.8	32677.6	19745.8	36845.9	19745.8	20235.2	19745.8	704.7	14792.9									708.2	29077.1	27150.9	13704.9	20100.2	13757.9	13704.9	13704.9	20635.8	13729.4	13747.3	13704.9	709.8	39697.5	39818.1	15350.3	23803.8	15364.7
708.5	30300.4	29728.4	14520.2	21655.8	14520.2	14783	14520.2	22436.2	14520.2	14413.9	14520.2	709.7	48646.6	49604.8	19530.2	32598.7	19530.2	36059.3	19530.2	20007.2	19530.2	704.6	14765.1									708.1	27291.8	25843.3	13554.2	19326.3	13606.5	13554.2	13554.2	19956.4	13578.4	13592.5	13554.2	709.7	38335.9	38188.5	15142.6	22791.7	15156.8
708.4	29526.9	28415.3	14343.6	20884.6	14343.6	14590.5	14343.6	21733.6	14343.6	14237.4	14343.6	709.6	48964.1	48833.5	19326.2	32426.8	19326.2	35267.8	19326.2	19791.3	19326.2	704.5	14429.5									708	25785.1	24644.3	13423.8	18631.8	13475.5	13423.8	13423.8	19326.1	13447.6	13458.4	13423.8	709.6	36863.6	36500.3	14944.7	21738.3	14958.7
708.3	28964.5	27136.8	14173.7	20129.9	14173.7	14405.4	14173.7	21055	14173.7	14067.6	14173.7	709.5	47658	47941.3	19119.1	32146.3	19119.1	34460.3	19119.1	19572.9	19119.1	704.4	14777.2									707.9	23881	23547.1	13310.4	18010.3	13361.5	13310.4	13310.4	18741.3	13334	13341.6	13310.4	709.5	35046.9	34826	14757.8	20711	14771.6
708.2	28067.6	25899.8	14008.2	19396.5	14008.2	14225.5	14008.2	20400.2	14008.2	13902.2	14008.2	709.4	46651.8	46942.5	18918.7	31768.8	18918.7	33649.5	18918.7	19361.6	18918.7	704.3	14644.3									707.8	22114.2	22552.5	13219.2	17463.2	13269.7	13219.2	13219.2	18206.6	13242.6	13247.4	13219.2	709.4	33734.4	33212.6	14584.7	19753	14598.3
708.1	26596.3	24713.3	13850.8	18693.1	13850.8	14054.5	13850.8	19773.3	13850.8	13744.9	13850.8	709.3	45156.5	45842.2	18723.2	31296.5	18723.2	32836.3	18723.2	19155.8	18723.2	704.2	14840.6									707.7	21094.3	21656.2	13148.9	16986	13198.7	13148.9	13148.9	17720.8	13172	13174.3	13148.9	709.3	31671.5	31680	14421.4	18880.6	14434.8
708	25241.3	23590.5	13708.1	18031.3	13708.1	13898.9	13708.1	19182.4	13708.1	13602.3	13708.1	709.2	43893.4	44653.8	18535.8	30739.6	18535.8	32027.4	18535.8	18958.5	18535.8	704.1	14724.2									707.6	19974.1	20843.6	13090.3	16565.4	13139.5	13090.3	13090.3	17273.6	13113.1	13113.1	13090.3	709.2	30655.6	30248.3	14274.2	18109.1	14287.5
707.9	23900	22533.7	13579	17413.4	13579	13757.5	13579	18626.5	13579	13473.2	13579	709.1	42517.8	43386.3	18354.9	30104.5	18354.9	31223.6	18354.9	18768.1	18354.9	704	14955.1									707.5	18966.3	20112.6	13044.9	16199.4	13093.5	13044.9	13044.9	16866.3	13067.5	13065.4	13044.9	709.1	29062	28910.5	14134.5	17428.7	14147.5
707.8	22296.4	21545.6	13463.3	16841.6	13463.3	13630.3	13463.3	18106	13463.3	13357.6	13463.3	709	40712.2	42054.8	18181.4	29403.1	18181.4	30429	18181.4	18585.5	18181.4	703.9	15098.6									707.4	18407.5	19456.6	13011.4	15882.7	13059.5	13011.4	13011.4	16496.5	13033.8	13029.9	13011.4	709	27394.3	27671.9	14007.1	16840.1	14020
707.7	20963.6	20632.1	13364.3	16321.4	13364.3	13520.3	13364.3	17624.6	13364.3	13258.7	13364.3	708.9	39364.4	40675.4	18018	28649.3	18018	29648.7	18018	18413.3	18018	703.8	14603.4									707.3	17701.9	18865.2	12984.5	15605.8	13032	12984.5	12984.5	16157.7	13006.6	13001	12984.5	708.9	26549.2	26528	13893	16336.3	13905.7
707.6	19820.1	19790.3	13279	15850.2	13279	13424.7	13279	17178.9	13279	13173.5	13279	708.8	38044	39259.6	17861.8	27852.5	17861.8	28882	17861.8	18248.7	17861.8	703.7	14508.5									707.2	17293.8	18336.3	12966	15367.5	13012.9	12966	12966	15851.2	12987.8	12980.8	12966	708.8	25878.6	25466	13785	15901.7	13797.5
707.5	18672	19019.2	13205.5	15426.7	13205.5	13341.5	13205.5	16767.5	13205.5	13100.1	13205.5	708.7	36300.7	37824.1	17712.7	27026.3	17712.7	28131.7	17712.7	18091.5	17712.7	703.6	14738.5									707.1	16885	17861.3	12952.2	15160.3	12998.6	12952.2	12952.2	15572	12973.9	12965.5	12952.2	708.7	23642.6	24479.4	13681.8	15526.5	13694.2
707.4	17639.9	18317.5	13144	15050.2	13144	13270.8	13144	16389.9	13144	13038.7	13144	708.6	35079.7	36385	17573.5	26185.7	17573.5	27401.8	17573.5	17944.5	17573.5	703.5	14971.4									707	16533.2	17436.5	12943.5	14981.6	12989.3	12943.5	12943.5	15319.2	12964.9	12955.3	12943.5	708.6	23190.4	23574.3	13596.9	15215.1	13609.1
707.3	16759	17682.1	13093.4	14718.3	13093.4	13211.5	13093.4	16044.3	13093.4	12988.1	13093.4	708.5	34566.4	34955.3	17440.9	25340.8	17440.9	26691.9	17440.9	17804.5	17440.9	703.4	14498.7									706.9	16412.9	17056.8	12938.9	14827.5	12984.2	12938.9	12938.9	15091.1	12960.1	12949.5	12938.9	708.5	22639.2	22731.1	13515	14945.1	13527.1
707.2	16241	17110.1	13052	14428.2	13052	13162	13052	15729	13052	12946.8	13052	708.4	32803	33543.6	17310.6	24499	17310.6	25998.9	17310.6	17667	17310.6	703.3	14841.6									706.8	16369	16715.5	12935.8	14692.7	12980.6	12935.8	12935.8	14883.4	12956.8	12945.3	12935.8	708.4	21761.5	21944.7	13437.2	14710.2	13449.1
707.1	15865.2	16594.3	13015.9	14173.7	13015.9	13118.2	13015.9	15439.1	13015.9	12910.8	13015.9	708.3	31774.5	32169.2	17190.4	23678.3	17190.4	25331.9	17190.4	17539.8	17190.4	703.2	14317.4									706.7	15950.4	16408.5	12933.2	14573.8	12977.5	12933.2	12933.2	14694.4	12953.9	12941.7	12933.2	708.3	21488.9	21213.3	13366.2	14507.4	13378
707	15536.6	16130.6	12983.6	13951.4	12983.6	13078.8	12983.6	15172.7	12983.6	12878.6	12983.6	708.2	31349.7	30839.9	17075.8	22884.7	17075.8	24688.3	17075.8	17418.5	17075.8	703.1	14199.9									706.6	15939.6	16136.7	12935.8	14473.4	12979.6	12935.8	12935.8	14527.3	12956.3	12943.3	12935.8	708.2	21616.9	20528.8	13296.9	14326.8	13308.5
706.9	15400.3	15715.3	12954.6	13758.2	12954.6	13043	12954.6	14928.1	12954.6	12849.8	12954.6	708.1	30352.3	29559.9	16963.1	22122	16963.1	24064.9	16963.1	17299.2	16963.1	703	14244									706.5	15558.5	15892.6	12938.5	14384.7	12981.8	12938.5	12938.5	14376.1	12958.8	12945.2	12938.5	708.1	20233.5	19883.8	13226	14160.8	13237.4
706.8	15069.4	15342.6	12926.8	13589.7	12926.8	13008.9	12926.8	14702.5	12926.8	12822.1	12926.8	708	29725.3	28341.8	16855.8	21400.9	16855.8	23466.8	16855.8	17185.7	16855.8	702.9	14411.1									706.4	15468.5	15677.7	12946	14310.6	12988.8	12946	12946	14244.3	12966.1	12952	12946	708	19780.5	19289.3	13166.2	14019.3	13177.5
706.7	14791.1	15011.8	12902.4	13445.6	12902.4	12978.6	12902.4	14497.2	12902.4	12797.8	12902.4	707.9	29015.3	27188.2	16751.7	20723.8	16751.7	22892.2	16751.7	17075.5	16751.7	702.8	15147.2									706.3	15358	15486	12954.7	14246.2	12997	12954.7	12954.7	14127	12974.6	12960	12954.7	707.9	19359.8	18734.9	13109.8	13891.9	13120.9
706.6	14517.7	14718.7	12880.9	13323	12880.9	12951.5	12880.9	14310.5	12880.9	12776.3	12880.9	707.8	28100.4	26103.1	16651.3	20094.5	16651.3	22341.9	16651.3	16969.3	16651.3	702.7	14688.3									706.2	15409.5	15315.7	12964.9	14190.5	13006.8	12964.9	12964.9	14023.8	12984.6	12969.6	12964.9	707.8	17871.3	18218.1	13056.4	13776.4	13067.5
706.5	14390.6	14460.3	12862.1	13219.7	12862.1	12927.5	12862.1	14141.8	12862.1	12757.6	12862.1	707.7	26924.4	25091.4	16555.9	19516.9	16555.9	21818.2	16555.9	16868.2	16555.9	702.6	14668									706.1	15301.5	15162.5	12974.6	14140.6	13016	12974.6	12974.6	13931.4	12994	12978.7	12974.6	707.7	17445.6	17747.1	13015.4	13680.5	13026.2
706.4	14187.8	14231.7	12844.5	13131.9	12844.5	12905.1	12844.5	13988.3	12844.5	12740.1	12844.5	707.6	25568.8	24154.7	16467.2	18992.8	16467.2	21322.4	16467.2	16774	16467.2	702.5	14304.2									706	15112.2	15026.7	12985.7	14097.5	13026.6	12985.7	12985.7	13851	13005	12989.4	12985.7	707.6	17328.6	17310.6	12977.6	13593.9	12988.3
706.3	13900.4	14030.8	12829.1	13058.3	12829.1	12885.1	12829.1	13849.8	12829.1	12724.8	12829.1	707.5	24420.3	23294.6	16386.3	18523.3	16386.3	20856.1	16386.3	16687.7	16386.3	702.4	14537.5									705.9	14897.4	14907.6	12999.3	14061.5	13039.8	12999.3	12999.3	13782.6	13018.4	13002.6	12999.3	707.5	16916.4	16905.2	12940.5	13513.2	12951.1
706.2	13903.4	13855.9	12816.6	12998.4	12816.6	12868.4	12816.6	13726.6	12816.6	12712.4	12816.6	707.4	22495.8	22507.9	16311.9	18105.7	16311.9	20417.9	16311.9	16608.1	16311.9	702.3	14383.4									705.8	14807.8	14804.1	13015.8	14032.3	13055.8	13015.8	13015.8	13725.7	13034.6	13018.6	13015.8	707.4	16153.7	16531.7	12906.5	13440.2	12917
706.1	13813.5	13701.2	12804	12947.2	12804	12851.8	12804	13614.3	12804	12699.9	12804	707.3	22163.5	21796.7	16248.9	17742.3	16248.9	20012.1	16248.9	16540	16248.9	702.2	14395.5									705.7	14845.6	14713.3	13033.5	14007.9	13073.1	13033.5	13033.5	13678.1	13052.2	13036.1	13033.5	707.3	15343.1	16191.3	12878.9	13377.2	12889.2
706	13710.3	13565.5	12792.2	12904.3	12792.2	12836.4	12792.2	13513.3	12792.2	12688.2	12792.2	707.2	21062.7	21148.9	16187.5	17421	16187.5	19629.2	16187.5	16473.8	16187.5	702.1	14569									705.6	14891.9	14632.5	13051	13986.3	13090.2	13051	13051	13637.2	13069.6	13053.3	13051	707.2	15109.4	15883.6	12857.8	13324.3	12868.1
705.9	13815.8	13446.7	12781.5	12868.6	12781.5	12822.2	12781.5	13422.8	12781.5	12677.6	12781.5	707.1	20326.8	20564.8	16132.6	17143	16132.6	19273	16132.6	16414	16132.6	702	14139.5									705.5	14744.4	14560.5	13068.2	13967	13107	13068.2	13068.2	13602.5	13086.5	13070.2	13068.2	707.1	14395.4	15601.9	12838.6	13276	12848.7
705.8	13441	13340.5	12769.4	12836.7	12769.4	12807	12769.4	13339.5	12769.4	12665.6	12769.4	707	19556.6	20039.1	16081.8	16903	16081.8	18941.1	16081.8	16358.6	16081.8	701.9	14706.3									705.4	14593.7	14498.7	13087.4	13952.2	13125.8	13087.4	13087.4	13575.7	13105.6	13089.1	13087.4	707	14101	15349.2	12825.4	13236.4	12835.3
705.7	13159.1	13250.7	12761.5	12813	12761.5	12796	12761.5	13268.2	12761.5	12657.7	12761.5	706.9	18290.1	19567.4	16035.5	16697.5	16035.5	18633.1	16035.5	16307.7	16035.5	701.8	14390.7									705.3	14539.8	14446.3	13108.7	13941.5	13146.7	13108.7	13108.7	13556	13126.7	13110.2	13108.7	706.9	13876.6	15120.3	12814.5	13201.4	12824.3
705.6	13199.9	13174.6	12756.5	12795.8	12756.5	12788.3	12756.5	13207.1	12756.5	12652.9	12756.5	706.8	17600	19148.4	15996.6	16526	15996.6	18351.1	15996.6	16264.5	15996.6	701.7	14668									705.2	14729.5	14401.5	13131	13933.7	13168.5	13131	13131	13542	13148.8	13132.3	13131	706.8	13953.8	14913.1	12805.4	13170.2	12815.2
705.5	13207	13107.5	12751.1	12780.8	12751.1	12780.3	12751.1	13152	12751.1	12647.6	12751.1	706.7	17251.4	18774.8	15961.7	16381.7	15961.7	18091.3	15961.7	16225.3	15961.7	701.6	14699.8									705.1	14564.1	14360.4	13151.1	13925.5	13188.3	13151.1	13151.1	13530	13168.8	13152.3	13151.1	706.7	13431.7	14723.9	12795.6	13140.1	12805.2
705.4	13097.3	13048.4	12745.5	12767.9	12745.5	12772.4	12745.5	13102.5	12745.5	12642.1	12745.5	706.6	17281.2	18440.4	15928.8	16259.2	15928.8	17850.6	15928.8	16188.2	15928.8	701.5	14343.3									705	14569.7	14326.9	13173.6	13921.2	13210.4	13173.6	13173.6	13524	13191	13174.6	13173.6	706.6	13405.8	14556.3	12790.2	13116	12799.7
705.3	12918	12997.5	12741	12757.8	12741	12765.8	12741	13059.4	12741	12637.8	12741	706.5	16684.5	18139.2	15895.5	16153.4	15895.5	17626	15895.5	16150.8	15895.5	701.4	14338.3									704.9	14345	14298.3	13196.3	13918.5	13232.7	13196.3	13196.3	13521.5	13213.6	13197.2	13196.3	706.5	13485.8	14404.9	12784.9	13093.5	12794.4
705.2	13043.7	12954.8	12738.6	12751	12738.6	12761.2	12738.6	13022.9	12738.6	12635.4	12738.6	706.4	16939	17871.5	15865.6	16065.3	15865.6	17420.5	15865.6	16117	15865.6	701.3	14596.4									704.8	14555.2	14277	13222	13920.2	13258	13222	13222	13524.9	13239.1	13222.8	13222	706.4	13859.8	14267.4	12779	13071.7	12788.3
705.1	13073.8	12916	12734.7	12743.8	12734.7	12755.5	12734.7	12989.2	12734.7	12631.6	12734.7	706.3	15603.2	17628.6	15834	15987.4	15834	17227.8	15834	16081.5	15834	701.2	14128.3									704.7	14733.5	14257.2	13245.5	13920.8	13281.1	13245.5	13245.5	13528.5	13262.4	13246.2	13245.5	706.3	13631	14139.9	12769.7	13047.7	12778.9
705	13038.8	12881.5	12730.4	12737.1	12730.4	12749.4	12730.4	12958.8	12730.4	12627.4	12730.4	706.2	15458.4	17417.7	15810.5	15927.3	15810.5	17057.2	15810.5	16054.1	15810.5											704.6	14376.5	14238.8	13267	13920.6	13302.3	13267	13267	13532.5	13283.8	13267.6	13267	706.2	13453	14026.7	12762.4	13026.8	12771.5
704.9	12957.9	12851.4	12726.5	12731.3	12726.5	12743.9	12726.5	12931.9	12726.5	12623.6	12726.5	706.1	15697.4	17228.6	15787.6	15875.9	15787.6	16900.3	15787.6	16027.6	15787.6											704.5	14737.1	14228.2	13293.2	13926.1	13328.2	13293.2	13293.2	13543.2	13309.9	13293.8	13293.2	706.1	13058.2	13926	12756.5	13008.2	12765.5
704.8	12909.3	12825.6	12723.4	12726.9	12723.4	12739.3	12723.4	12908.9	12723.4	12620.6	12723.4	706	15739.6	17056.6	15763.2	15829.4	15763.2	16754.1	15763.2	15999.5	15763.2											704.4	14553.8	14216.1	13315.3	13928.5	13349.9	13315.3	13315.3	13551.4	13331.8	13315.8	13315.3	706	13392.4	13838.8	12753.9	12993.8	12762.8
704.7	12953.1	12803.3	12720.8	12723.3	12720.8	12735.4	12720.8	12888.9	12720.8	12618.1	12720.8	705.9	15494.8	16900.9	15738.3	15787.5	15738.3	16618.8	15738.3	15971.1	15738.3											704.3	14446.8	14209	13340	13934.2	13374.2	13340	13340	13563.7	13356.3	13340.4	13340	705.9	13264.5	13757.8	12748.5	12977.4	12757.3
704.6	12791.7	12783.1	12717.7	12719.5	12717.7	12731	12717.7	12870.6	12717.7	12615.1	12717.7	705.8	15662.5	16761.1	15714.8	15751.1	15714.8	16495.4	15714.8	15944.2	15714.8											704.2	14233	14205.7	13366.2	13942.5	13400.1	13366.2	13366.2	13579	13382.4	13366.6	13366.2	705.8	13176.1	13686	12744.1	12962.7	12752.8
704.5	12747.2	12767	12716.4	12717.7	12716.4	12728.5	12716.4	12856	12716.4	12613.9	12716.4	705.7	15369.6	16633.3	15690.1	15716.7	15690.1	16380.7	15690.1	15916.1	15690.1											704.1	14178.1	14207.3	13395.5	13954.6	13429	13395.5	13395.5	13598.3	13411.5	13395.8	13395.5	705.7	13221.1	13622.4	12740.4	12949.4	12749
704.4	12714.9	12753.3	12715.5	12716.4	12715.5	12726.6	12715.5	12843.6	12715.5	12613.2	12715.5	705.6	15197.6	16518.6	15667.1	15686.4	15667.1	16276.6	15667.1	15889.8	15667.1											704	14411.1	14211.8	13425.8	13968.4	13459	13425.8	13425.8	13619.8	13441.7	13426	13425.8	705.6	12687.1	13564.8	12736.3	12936.4	12744.8
704.3	12723.8	12741.6	12715	12715.7	12715	12725.2	12715	12833.1	12715	12612.8	12715	705.5	14878.3	16415.2	15645	15658.9	15645	16181.8	15645	15864.5	15645											703.9	14200.5	14215.4	13453.5	13980.5	13486.5	13453.5	13453.5	13639.6	13469.3	13453.8	13453.5	705.5	12998.3	13517.7	12736.7	12928.4	12745.1
704.2	12708	12731.3	12714.4	12714.9	12714.4	12723.7	12714.4	12823.8	12714.4	12612.3	12714.4	705.4	15366.9	16322.7	15624.7	15634.6	15624.7	16096.5	15624.7	15841	15624.7											703.8	14429.8	14223.3	13484.3	13996.1	13516.9	13484.3	13484.3	13663.1	13499.9	13484.5	13484.3	705.4	13330	13473.2	12734.5	12918.2	12742.8
704.1	12756.9	12722.4	12714	12714.3	12714	12722.4	12714	12815.7	12714	12612	12714	705.3	15375.5	16235.2	15601.3	15608.3	15601.3	16014.9	15601.3	15814.5	15601.3											703.7	14617.7	14230.1	13512.5	14010	13544.8	13512.5	13512.5	13684.9	13528	13512.7	13512.5	705.3	13084.4	13430.4	12729.4	12905.7	12737.6
704	12771	12714	12713	12713.2	12713	12720.7	12713	12808.1	12713	12611.1	12713	705.2	15163.6	16154.7	15577.7	15582.6	15577.7	15939.6	15577.7	15787.9	15577.7											703.6	14465.1	14236.1	13538.8	14022.4	13570.8	13538.8	13538.8	13705.2	13554.1	13539	13538.8	705.2	12941.2	13393.7	12726.4	12895.7	12734.5
703.9	13020.8	12706.4	12711.9	12712	12711.9	12718.8	12711.9	12801.1	12711.9	12610.1	12711.9	705.1	15127.2	16081.8	15555.2	15558.7	15555.2	15871.1	15555.2	15762.5	15555.2											703.5	14389	14245.5	13567.3	14037.6	13599	13567.4	13567.3	13728.2	13582.5	13567.5	13567.3	705.1	12952.9	13361.9	12724.5	12887.3	12732.6
703.8	13086.2	12696.8	12707.9	12708	12707.9	12714.2	12707.9	12792	12707.9	12606.3	12707.9	705	15305.9	16014.7	15532.9	15535.2	15532.9	15808	15532.9	15737.2	15532.9											703.4	14378.2	14257	13597.1	14054.7	13628.5	13597.1	13597.1	13753	13612.2	13597.3	13597.1	705	12907.3	13333.1	12722.6	12879.1	12730.6
703.7	12776.1	12687	12703.2	12703.3	12703.2	12709	12703.2	12782.8	12703.2	12601.6	12703.2	704.9	15032.7	15951.5	15509.3	15510.9	15509.3	15748.4	15509.3	15710.8	15509.3											703.3	14295.8	14270	13627.5	14072.7	13658.5	13627.5	13627.5	13778.7	13642.4	13627.5	13627.5	704.9	12714.4	13307.4	12721	12871.7	12728.9
703.6	12670.7	12681.3	12701.9	12702	12701.9	12707.1	12701.9	12777.6	12701.9	12600.5	12701.9	704.8	14684.2	15894.4	15487.2	15488.3	15487.2	15694.5	15487.2	15685.9	15487.2											703.2	14319.1	14285.2	13659.2	14092.7	13689.9	13659.2	13659.2	13806.1	13673.9	13659.2	13659.2	704.8	12971.5	13285.8	12721.1	12866.2	12728.9
703.5	12714.9	12677.3	12701.8	12701.8	12701.8	12706.5	12701.8	12773.9	12701.8	12600.4	12701.8	704.7	14660.3	15843.3	15467.1	15467.9	15467.1	15646.5	15467.1	15663.1	15467.1											703.1	14508.5	14301.3	13691	14113.2	13721.4	13691	13691	13833.9	13705.6	13691	13691	704.7	12993.9	13264.2	12718.9	12858.8	12726.7
703.4	12675.2	12673.2	12701.1	12701.1	12701.1	12705.4	12701.1	12770.1	12701.1	12599.9	12701.1	704.6	14726.5	15795.8	15447.1	15447.6	15447.1	15602	15447.1	15640.4	15447.1											703	14482.2	14316.1	13720.8	14132.1	13751	13720.8	13720.8	13860	13735.4	13720.9	13720.8	704.6	12379.4	13244.2	12716.6	12851.5	12724.2
703.3	12625.2	12669.9	12700.9	12700.9	12700.9	12704.8	12700.9	12767.1	12700.9	12599.8	12700.9	704.5	14245.3	15751	15426.5	15426.9	15426.5	15560	15426.5	15617.2	15426.5											702.9	14327	14332.2	13751.4	14152.2	13781.3	13751.4	13751.4	13887.1	13765.8	13751.4	13751.4	704.5	12550.8	13231.1	12719.5	12849.7	12727
703.2	12857.8	12667.5	12701.2	12701.2	12701.2	12704.7	12701.2	12765	12701.2	12600.2	12701.2	704.4	14474.9	15711.8	15408.8	15409	15408.8	15523.5	15408.8	15596.9	15408.8											702.8	14195.4	14351.3	13784.2	14175	13813.9	13784.2	13784.2	13916.6	13798.5	13784.3	13784.2	704.4	13085.1	13217.9	12720.9	12846.7	12728.4
703.1	12906.1	12662.8	12699	12699	12699	12702.1	12699	12760.5	12699	12598.1	12699	704.3	14734.5	15673.6	15389.5	15389.7	15389.5	15487.9	15389.5	15575.1	15389.5											702.7	14151.7	14372.9	13819.1	14200.2	13848.5	13819.1	13819.1	13948.4	13833.3	13819.2	13819.1	704.3	12828.8	13201.4	12717.8	12839.3	12725.2
703	12738.2	12657.7	12696.2	12696.2	12696.2	12699	12696.2	12755.6	12696.2	12595.4	12696.2	704.2	14689.5	15636	15368.5	15368.6	15368.5	15452.7	15368.5	15551.7	15368.5											702.6	14440.8	14396.1	13855	14226.7	13884.1	13855	13855	13981.3	13869	13855	13855	704.2	12787	13188.2	12716.9	12834.3	12724.2
702.9	12649	12654.7	12695.2	12695.2	12695.2	12697.8	12695.2	12752.8	12695.2	12594.6	12695.2	704.1	14997.1	15600.4	15347.7	15347.8	15347.7	15419.6	15347.7	15528.5	15347.7											702.5	14497.5	14416.6	13887.8	14250.4	13916.5	13887.8	13887.8	14011.2	13901.6	13887.8	13887.8	704.1	13043.8	13176.2	12716.3	12829.9	12723.5
702.8	12719.6	12652.9	12695.2	12695.2	12695.2	12697.5	12695.2	12751.1	12695.2	12594.7	12695.2	704	15437.5	15564.5	15324.9	15324.9	15324.9	15386.1	15324.9	15503.2	15324.9											702.4	14328.6	14437.2	13920.2	14274.1	13948.7	13920.2	13920.2	14040.9	13934	13920.2	13920.2	704	12836.4	13162.9	12713.5	12823.5	12720.6
702.7	12852.8	12650.4	12694.5	12694.5	12694.5	12696.5	12694.5	12748.7	12694.5	12594	12694.5	703.9	14792.1	15527.3	15299.2	15299.2	15299.2	15351.2	15299.2	15475.2	15299.2											702.3	14322.4	14460.8	13955.1	14300.7	13983.4	13955.1	13955.1	14073.3	13968.8	13955.1	13955.1	703.9	13121.8	13152	12712.4	12818.9	12719.5
702.6	12918.4	12646.6	12692.2	12692.2	12692.2	12694.1	12692.2	12745	12692.2	12591.9	12692.2	703.8	14517.2	15495.2	15277.3	15277.3	15277.3	15321.4	15277.3	15451.1	15277.3											702.2	14340.8	14485.2	13990.6	14328	14018.6	13990.6	13990.6	14106.2	14004.1	13990.6	13990.6	703.8	13057.2	13139.3	12708.9	12812.1	12716
702.5	12709.2	12642.1	12689.2	12689.2	12689.2	12690.9	12689.2	12740.6	12689.2	12589	12689.2	703.7	14936	15465.9	15257	15257	15257	15294.3	15257	15428.5	15257											702.1	14418.7	14510.3	14026.2	14355.9	14054	14026.2	14026.2	14139.5	14039.6	14026.2	14026.2	703.7	13421.7	13127.7	12706	12806	12712.9
702.4	12612.1	12640	12688.5	12688.5	12688.5	12690	12688.5	12738.6	12688.5	12588.4	12688.5	703.6	14821.4	15434.8	15233.9	15233.9	15233.9	15265.5	15233.9	15403.3	15233.9											702	14095.5	14535.2	14061.4	14383.4	14088.9	14061.4	14061.4	14172.3	14074.7	14061.4	14061.4	703.6	13015	13113.4	12699.9	12796.9	12706.8
702.3	12716.4	12639.1	12688.8	12688.8	12688.8	12690.2	12688.8	12737.7	12688.8	12588.9	12688.8	703.5	15054.4	15405.2	15211.5	15211.5	15211.5	15238	15211.5	15378.7	15211.5											701.9	13818.7	14564.9	14100.9	14415.7	14128.2	14100.9	14100.9	14209.7	14114.1	14100.9	14100.9	703.5	13052.8	13103	12697.2	12791.3	12704
702.2	12713.3	12637.2	12688	12688	12688	12689.2	12688	12735.7	12688	12588.2	12688	703.4	14727.7	15374.9	15187.4	15187.4	15187.4	15209.8	15187.4	15352.5	15187.4											701.8	14022.4	14598.9	14144.4	14452.1	14171.4	14144.4	14144.4	14251	14157.5	14144.4	14144.4	703.4	12904	13092.6	12694.1	12785.5	12700.9
702.1	12697.8	12635.3	12687.2	12687.2	12687.2	12688.3	12687.2	12733.9	12687.2	12587.5	12687.2	703.3	14373.4	15347	15165.3	15165.3	15165.3	15184	15165.3	15328.3	15165.3											701.7	14196.2	14631.1	14185.9	14486.8	14212.7	14185.9	14185.9	14290.5	14198.9	14186	14185.9	703.3	13100.8	13083.8	12692.3	12781	12699
702	12505.7	12633.6	12686.6	12686.6	12686.6	12687.6	12686.6	12732.2	12686.6	12587	12686.6	703.2	14640.7	15321.8	15145.1	15145.1	15145.1	15160.8	15145.1	15306.1	15145.1											701.6	14379.9	14662	14225.8	14520.1	14252.3	14225.8	14225.8	14328.3	14238.7	14225.8	14225.8	703.2	12942.6	13073.6	12688.9	12775	12695.5
701.9	12469.2	12634.2	12688.1	12688.1	12688.1	12689	12688.1	12732.7	12688.1	12588.7	12688.1	703.1	14848.5	15295.3	15123.2	15123.2	15123.2	15136.3	15123.2	15282.2	15123.2																							703.1	13065.3	13065	12686.7	12770.5	12693.3
701.8	12706.5	12635.2	12690	12690	12690	12690.9	12690	12733.7	12690	12590.7	12690	703	14491.7	15267.9	15099.9	15099.9	15099.9	15110.8	15099.9	15257	15099.9																							703	13004	13055.5	12683.5	12764.9	12690
701.7	12871.6	12633.6	12689.4	12689.4	12689.4	12690.1	12689.4	12732.1	12689.4	12590.2	12689.4	702.9	14547.5	15242.8	15078.6	15078.6	15078.6	15087.7	15078.6	15233.8	15078.6																							702.9	13044.3	13046.8	12680.7	12759.9	12687.2
701.6	12725.7	12630.3	12686.8	12686.8	12686.8	12687.5	12686.8	12728.7	12686.8	12587.8	12686.8	702.8	15142.8	15217.7	15056.9	15056.9	15056.9	15064.5	15056.9	15210.1	15056.9																							702.8	13222.9	13038	12677.6	12754.7	12684
												702.7	14442	15189	15031.4	15031.4	15031.4	15037.6	15031.4	15182.8	15031.4																							702.7	12943.6	13027.7	12673	12748	12679.3
												702.6	14328.6	15164.7	15010	15010	15010	15015.2	15010	15159.5	15010																							702.6	12900.5	13020	12670.7	12743.7	12676.9
												702.5	14634.9	15141.2	14989.2	14989.2	14989.2	14993.4	14989.2	15137	14989.2																							702.5	12502.9	13012.8	12668.7	12739.9	12674.9
												702.4	14480.3	15115.9	14966.4	14966.4	14966.4	14969.9	14966.4	15112.4	14966.4																							702.4	12587.2	13009.1	12670.1	12739.4	12676.3
												702.3	14860	15091.5	14944.4	14944.4	14944.4	14947.2	14944.4	15088.6	14944.4																							702.3	12705.2	13004.8	12670.8	12738.4	12676.9
												702.2	14875.9	15064.8	14919.9	14919.9	14919.9	14922.2	14919.9	15062.5	14919.9																							702.2	12655.6	12999.7	12670.5	12736.4	12676.6
												702.1	14277.9	15038	14895.2	14895.2	14895.2	14897.1	14895.2	15036	14895.2																							702.1	12839.2	12995.1	12670.7	12734.9	12676.6
												702	14370.8	15014.8	14874	14874	14874	14875.5	14874	15013.2	14874																							702	13061.5	12989.1	12669.2	12731.9	12675.1
												701.9	14309.4	14991	14852	14852	14852	14853.3	14852	14989.7	14852																							701.9	12470.5	12981.3	12665.9	12727	12671.7
												701.8	14418.2	14967.5	14830.4	14830.4	14830.4	14831.4	14830.4	14966.4	14830.4																							701.8	12284.9	12978.6	12667.5	12727.3	12673.4
												701.7	14313.4	14943.2	14807.9	14807.9	14807.9	14808.7	14807.9	14942.4	14807.9																							701.7	12923.1	12977.6	12670.8	12729.1	12676.6
												701.6	14654.3	14919.6	14786	14786	14786	14786.6	14786	14918.9	14786																							701.6	12740.8	12971.3	12668.6	12725.6	12674.4
												701.5	14778.6	14893.8	14761.8	14761.8	14761.8	14762.3	14761.8	14893.2	14761.8																							701.5	12898.8	12966.6	12668	12723.7	12673.7
												701.4	14937.6	14867.1	14736.6	14736.6	14736.6	14737.1	14736.6	14866.6	14736.6																							701.4	12488.2	12960.7	12666.1	12720.5	12671.7
												701.3	14393	14839.3	14710.4	14710.4	14710.4	14710.8	14710.4	14838.9	14710.4																							701.3	12940.5	12958.3	12667.6	12720.8	12673.1
												701.2	14666.2	14814.7	14687.4	14687.4	14687.4	14687.6	14687.4	14814.5	14687.4																							701.2	12847.6	12952.2	12665.3	12717.2	12670.8
												701.1	14662.5	14788.4	14662.5	14662.5	14662.5	14662.7	14662.5	14788.2	14662.5																							701.1	12663.7	12946.9	12663.7	12714.5	12669.2
[truncated: 14 more columns]

## Sheet: Figure S2
CM	Fe2+/FeT (Y)	AVERAGE	0.339331	0.27	0.23	0.18	0.15178	0.123753	0.138675	0.118959	0.126062	0.33769	0.29	0.24	0.21	0.165918	0.132039	0.144662	0.157164	0.116656
		STDEV	0.0143905	0.0169663	0.0242908	0.0273237	0.0121646	0.0119591	0.00439054	0.00696629	0.0342908	0.00732369	0.0121646	0.00195908	0.00439054	0.00696629	0.00429084	0.00732369	0.0221646	0.00195908
	|Δχ| (%) (X)	AVERAGE	0	2.6616	5.34312	6.34863	7.69418	8.50205	8.86193	10.2688	11.2003	0	2.85655	3.94866	5.38245	6.53483	7.61053	8.08537	8.94531	9.63502
		STDEV	0	0.0145062	0.210146	0.295842	0.337984	0.293159	0	0.249083	0.241401	0	0.259637	0.349328	0	0.068989	0.009924	0.244113	0.571516	0.37597
HM	Fe2+/FeT (Y)	AVERAGE	0.331936	0.32	0.31	0.3	0.288109	0.291912	0.280586	0.273161	0.28	0.333351	0.315	0.3011	0.292	0.27674	0.27	0.269862	0.262836	0.271756
		STDEV	0.0143905	0.0121646	0.0169663	0.0173237	0.0142908	0.0119591	0.0121646	0.00195908	0.00439054	0.00195908	0.00732369	0.0142908	0.00696629	0.00439054	0.0221646	0.00429084	0.00696629	0.00732369
	|Δχ| (%) (X)	AVERAGE	0	0.998029	1.87304	2.59781	3.23895	3.52342	3.94485	4.05	4.27	0	0.953567	1.84078	2.61258	3.37895	3.59661	3.82033	4.43	4.55
		STDEV	0	0.0145062	0.210146	0.295842	0.337984	0.293159	0	0.068989	0.009924	0	0.171516	0.37597	0	0.334739	0.258481	0.412083	0.223761	0.0566572

## Sheet: Figure S3
HM pristine							Bio-trated HM							CM pristine							Bio-trated CM
Binding energy (ev)	Raw data	Sum peak	Background	Lattice Oxygen	Oxygen vancancy	Adsorbed oxygen	Binding energy (ev)	Raw data	Sum peak	Background	Lattice Oxygen	Oxygen vancancy	Adsorbed oxygen	Binding energy (ev)	Raw data	Sum peak	Background	Lattice Oxygen	Oxygen vancancy	Adsorbed oxygen	Binding energy (ev)	Raw data	Sum peak	Background	Lattice Oxygen	Oxygen vancancy	Adsorbed oxygen
536	9874.11	9954.4	9874.11	9936.78	9874.11	9891.72	536	14764.2	14876.7	14764.2	14872.5	14764.2	14768.3	536	12109.2	12227.9	12109.2	12189.2	12124.6	12132.5	536	12654.1	12818.5	12654.1	12723.9	12654.1	12748.7
535.9	10020.1	9965.18	9874.11	9938.9	9874.11	9900.39	535.9	14648.7	14883	14764.2	14876	14764.2	14771.2	535.9	12000.1	12239.8	12109.2	12192	12125.1	12141	535.9	12416.6	12829.6	12654.1	12726.2	12654.1	12757.5
535.8	10141.7	9979.42	9873.71	9940.73	9873.71	9912.4	535.8	14751.4	14891.5	14764.5	14880	14764.5	14776.1	535.8	11768.5	12255.1	12109.6	12195.3	12126.1	12152.8	535.8	12763.7	12843.9	12654.5	12729.1	12654.5	12769.4
535.7	10143.2	9998.49	9872.98	9942.33	9872.98	9929.14	535.7	14693	14902.6	14764.6	14883.8	14764.6	14783.4	535.7	12019.2	12275.1	12110.7	12199.5	12127.9	12169	535.7	12832.6	12861.6	12654.3	12731.5	12654.3	12784.5
535.6	9984	10024.5	9872.24	9944.06	9872.24	9952.66	535.6	14387.3	14918.1	14764.8	14888	14764.8	14794.8	535.6	11947.9	12299	12111	12203.1	12128.9	12189	535.6	12621.1	12885.6	12654	12733.9	12654	12805.8
535.5	10119.9	10059.9	9871.93	9946.35	9871.93	9985.48	535.5	14156.6	14940.6	14765.8	14893.3	14765.8	14813.1	535.5	11883.8	12329.3	12111.5	12207.1	12130.1	12215.1	535.5	13206.8	12920.1	12654.1	12736.8	12654.1	12837.5
535.4	10494.2	10106.5	9871.26	9948.41	9871.26	10029.4	535.4	14298.7	14972.5	14767.5	14899.4	14767.5	14840.6	535.4	11785.1	12367.3	12112.2	12211.5	12131.6	12248.7	535.4	12936.8	12969.2	12653	12738.7	12653	12883.5
535.3	10462.4	10166.8	9869.55	9949.6	9869.55	10086.7	535.3	14560.6	15016.4	14768.9	14905.4	14768.9	14879.8	535.3	11947.8	12415	12113.3	12216.5	12133.5	12291.6	535.3	12919.8	13042.7	12652.5	12741.4	12652.5	12953.8
535.2	10418.7	10245.1	9867.93	9951.03	9867.93	10162	535.2	14481.8	15076.5	14769.4	14910.9	14769.4	14935	535.2	11857.8	12473.4	12113.9	12221.1	12134.9	12345.1	535.2	13189.5	13151.4	12652	12744.2	12652	13059.2
535.1	10535	10345.7	9866.43	9952.77	9866.43	10259.3	535.1	13941.5	15159.7	14770.2	14916.9	14770.2	15013	535.1	12000.3	12545.8	12114.7	12226.3	12136.7	12412.3	535.1	13422	13310.8	12651	12746.8	12651.1	13214.9
535	10578.6	10472	9864.6	9954.36	9864.6	10382.2	535	14480	15274.5	14772.6	14924.7	14772.6	15122.4	535	12298.1	12634.2	12115.1	12231.3	12138	12495	535	13403.8	13541	12649.5	12749	12649.7	13441.3
534.9	10606.6	10628.5	9862.65	9956.05	9862.65	10535.1	534.9	14986.4	15426.5	14773.4	14931.2	14773.4	15268.6	534.9	12069.4	12741	12114.5	12235.6	12138.5	12595.9	534.9	14245.4	13868	12648.1	12751.6	12648.5	13764.1
534.8	10758.4	10819.6	9860.61	9957.87	9860.62	10722.4	534.8	14776.3	15625.9	14772.8	14936.8	14772.9	15461.8	534.8	12204.9	12871.4	12114.6	12241	12139.8	12719.9	534.8	14485.1	14320.3	12645.1	12752.8	12645.9	14211.8
534.7	10938.1	11048.5	9858.16	9959.52	9858.19	10947.1	534.7	14864.5	15885.3	14772.8	14943.2	14773	15714.6	534.7	12590.7	13027.7	12114.3	12246.3	12140.7	12869.4	534.7	15040.3	14931.2	12641.6	12753.8	12643.3	14817.4
534.6	11291.4	11318.4	9855.21	9960.93	9855.27	11212.6	534.6	15388	16215.6	14772.5	14949.8	14772.9	16037.9	534.6	12872	13213.1	12112.8	12250.7	12140.5	13047.5	534.6	15920.6	15734.3	12637.1	12754.1	12640.3	15614.2
534.5	11477.9	11630.2	9851.28	9961.66	9851.41	11519.7	534.5	16141.8	16626.3	14770.8	14955.4	14771.5	16441.1	534.5	13206.4	13431.8	12110.3	12254.5	12139.5	13258.3	534.5	17231.8	16757.8	12631	12753	12636.9	16629.9
534.4	11644.3	11984.9	9846.83	9962.17	9847.1	11869.3	534.4	16609.9	17127	14767	14959.2	14768.2	16933.4	534.4	13287.8	13687.8	12106.7	12257.8	12137.5	13505.9	534.4	17852.2	18023.4	12622.3	12749.7	12633.4	17884.9
534.3	12297.7	12381.3	9841.92	9962.56	9842.48	12260.1	534.3	17764.7	17726.3	14761.8	14962.3	14764.2	17523.4	534.3	13906.3	13986.2	12102.8	12261.2	12135.6	13795.1	534.3	19430.7	19541.5	12612.5	12745.6	12632.4	19388.4
534.2	12984.3	12813.9	9835.21	9961.52	9836.33	12686.5	534.2	18396	18425.7	14753.3	14962.6	14757.7	18212.1	534.2	14509.7	14328.9	12096.9	12263.1	12132	14127.6	534.2	21382.1	21298.5	12599.7	12739	12634.9	21123.9
534.1	13438.9	13277.1	9826.6	9959	9828.81	13142.5	534.1	19285.6	19226.7	14743.1	14961.7	14750.9	19000.3	534.1	15133.9	14719.8	12089	12263.6	12126.9	14507.3	534.1	23385	23262.8	12583.2	12729.1	12643.9	23056.1
534	14010.4	13762.7	9816.72	9955.65	9820.96	13619.5	534	20587.7	20121	14730.4	14958.9	14743.9	19878.8	534	15249.1	15161.5	12079	12262.7	12120.5	14936.3	534	24912.7	25375.1	12562.9	12715.8	12665.2	25119.7
533.9	14562.8	14260.4	9805.26	9951.2	9813.19	14106.5	533.9	21452.8	21094.7	14713.9	14953.1	14737.1	20832.2	533.9	15970.8	15658.2	12068.6	12262.1	12114.9	15418.5	533.9	26642.3	27557.4	12539.6	12700.2	12708.3	27228.1
533.8	15165.7	14758.6	9792.25	9945.76	9806.76	14590.5	533.8	22479.2	22130	14695	14945.6	14734	21840.3	533.8	16366.7	16210.2	12055.9	12260	12108.8	15953.1	533.8	29601.4	29712.6	12513.1	12681.9	12784.8	29272.2
533.7	15345.2	15243.9	9777.56	9939.22	9803.41	15056.4	533.7	23925	23199.6	14673.1	14936	14737.4	22872.4	533.7	16998.5	16818.4	12041.7	12257.3	12104	16540.5	533.7	31916.3	31727.7	12481	12658.5	12908.4	31122.8
533.6	15846.3	15705.5	9762.34	9932.82	9807.31	15490.1	533.6	25100	24273.2	14647.1	14923.2	14751.2	23893.1	533.6	17800.5	17482.6	12025.5	12253.6	12101.1	17178.8	533.6	33874.7	33499.6	12444.5	12631.5	13101.9	32655.1
533.5	16429	16131.1	9745.71	9925.74	9821.99	15874.8	533.5	26144.1	25317.8	14617.8	14908	14782.8	24862.5	533.5	18650.1	18200.3	12006.5	12248.2	12101.5	17863.7	533.5	35561.6	34934.9	12404.2	12601.5	13392.1	33749.6
533.4	16513.5	16512.3	9727.44	9917.84	9853.71	16195.6	533.4	26908.3	26302.3	14585.4	14890.9	14842.3	25739.8	533.4	19055.9	18969.5	11984.8	12241.2	12107.5	18590.3	533.4	36024.1	35974.4	12360.6	12569.1	13811.6	34314.9
533.3	16912.5	16846.9	9708.89	9910.57	9912.86	16441.2	533.3	27681.4	27199.9	14550.8	14872.8	14943.2	26485.5	533.3	20184.8	19789.5	11961.6	12234.3	12124.3	19354.1	533.3	36803.5	36603.8	12316.1	12536.7	14399.3	34300.1
533.2	16900.5	17135.2	9689.19	9903.18	10010.6	16599.8	533.2	28005.4	27989	14513.9	14853.8	15101.6	27061.4	533.2	20587.9	20653.5	11934.6	12225.1	12154.2	20143.4	533.2	36536.2	36857.8	12270.1	12503.8	15192.2	33702
533.1	16779	17387.2	9669.48	9896.92	10163.7	16665.5	533.1	28097.8	28662.1	14476	14835.3	15339.8	27439.1	533.1	21787.1	21561.4	11906.3	12216.3	12206.1	20951.5	533.1	36479.2	36824.8	12224.5	12472.5	16231.1	32570
533	16891.3	17618.5	9650.05	9892.22	10391.3	16635.1	533	28434.4	29223	14437.8	14818.1	15682.9	27597.6	533	22285.4	22506.2	11873.9	12205.5	12285.3	21763.2	533	36911.5	36626.7	12178.9	12442.6	17546.8	30994.9
532.9	17149	17851.3	9630.25	9888.61	10715	16508.3	532.9	28804.6	29690.2	14398.5	14801.7	16159.2	27526.2	532.9	23191.1	23488.2	11839.8	12195.2	12404.1	22568.4	532.9	36843.2	36401.2	12132.4	12413.4	19160.9	29091.7
532.8	17502.8	18114.3	9609.69	9885.93	11158.8	16289	532.8	29148.8	30097.7	14358	14786.3	16801	27226.5	532.8	24286.4	24505.3	11802.6	12184.6	12573.6	23352.3	532.8	36801.3	36282.8	12085.9	12385.9	21081.1	26987.7
532.7	18115.4	18439.1	9588.12	9884.12	11746	15985.3	532.7	29181.8	30492.2	14316.5	14772.1	17641	26712	532.7	25343.6	25555.8	11761.7	12173.2	12807.2	24098.7	532.7	35723.2	36380.4	12039.4	12360.4	23288.5	24810.5
532.6	18944.3	18858.5	9564.81	9882.8	12498.1	15607.2	532.6	30306.9	30932	14274.7	14760.5	18713.8	26007.2	532.6	26547	26643	11717.2	12161.8	13121.8	24793.7	532.6	36315.5	36765.7	11994.9	12339.1	25744.8	22671.7
532.5	19850.2	19400.3	9539.16	9881.77	13428.8	15168.1	532.5	30846.4	31474.7	14229.7	14748.7	20043.2	25142.2	532.5	27700.3	27768.9	11668.6	12150.6	13534	25421.4	532.5	37009.7	37454.7	11949.2	12319.4	28372.3	20661.4
532.4	20875.5	20085.3	9510.98	9881.42	14543.2	14682.6	532.4	32623.9	32181.6	14183	14738.8	21652	24156.9	532.4	29021.6	28939.9	11616	12140.7	14062.8	25968.4	532.4	37505.5	38414.2	11902.1	12301.7	31072.8	18843.8
532.3	22096.1	20921.1	9479.91	9882.38	15832.8	14165.7	532.3	33610.8	33100.1	14131.2	14728.2	23546	23088.4	532.3	30213.2	30163.3	11559	12133.2	14726.5	26421.6	532.3	40018.1	39563	11853.9	12287.5	33725.7	17257.7
532.2	23204.7	21896.9	9445.42	9885.66	17269.3	13632.8	532.2	35599.3	34265.4	14076.5	14720	25716.9	21981.5	532.2	31509.9	31446	11497.9	12131.2	15541	26769.5	532.2	41194.8	40774.3	11801	12274.6	36185.7	15916
532.1	23845.7	22986.6	9407.8	9894.37	18809.8	13098	532.1	37811.9	35688.3	14016.1	14713.2	28136.4	20870.9	532.1	32869	32798.2	11432.3	12139.3	16520.2	27003.2	532.1	42833.2	41908	11745.7	12268.5	38316.2	14814.7
532	24508.6	24144.4	9368.33	9914.63	20390.6	12575.9	532	39521.2	37352.2	13949.2	14709.5	30750.3	19790.8	532	34227.1	34227.9	11362	12166.2	17670.6	27115.1	532	42968	42813.8	11687.3	12273.1	39980.7	13934.5
531.9	25254.7	25311.8	9326.94	9954.99	21934.1	12076.6	531.9	39513.6	39217.9	13877.4	14715	33488.6	18769.1	531.9	35715.3	35748.7	11287.1	12228.2	18993.2	27101.4	531.9	44144.9	43363.8	11628.5	12299.4	41072.6	13248.8
531.8	26068.9	26424.4	9283.4	10030	23353.5	11607.8	531.8	41801.4	41224.8	13805.4	14741.9	36263.5	17830.2	531.8	37533.8	37379.5	11207	12353.1	20480.5	26960.1	531.8	43780.5	43459.9	11567.3	12358.5	41513.6	12722.5
531.7	26588.7	27420.8	9237.51	10163.2	24557	11175.6	531.7	43292.5	43277.7	13726.8	14795.7	38954.4	16981.2	531.7	38994.9	39146.9	11120.7	12586.5	22110.4	26691.5	531.7	42347.4	43058.7	11506.8	12474.1	41271.8	12326.4
531.6	26918.9	28261.8	9190.08	10393.8	25464.5	10783.6	531.6	44182.3	45285.5	13643.8	14898.3	41445.5	16229.2	531.6	40174.5	41102.4	11029.4	13004.1	23856.2	26300.8	531.6	41851.1	42175.3	11448.8	12679.5	40361.4	12032
531.5	27537.7	28938.5	9141.61	10778.6	26009	10434	531.5	45806.6	47154.4	13558	15081.1	43612.7	15576.6	531.5	43002.7	43319.2	10933.9	13715.9	25675	25796.2	531.5	40812.4	40885.5	11391.6	13017.6	38839.1	11812
531.4	28370.6	29487.8	9091.32	11397.3	26148	10125	531.4	47533.2	48808.8	13467.4	15387.1	45340.4	15016.2	531.4	45629.3	45901.6	10828.8	14867.7	27510.3	25181.2	531.4	38966.6	39326.5	11336.3	13551.3	36801.4	11646.4
531.3	29894.1	30000.4	9038.62	12356.9	25866.8	9853.95	531.3	48791.5	50207.7	13371.8	15880.5	46531.6	14539.2	531.3	49043.4	48994.2	10714.7	16653.4	29303.1	24467.2	531.3	37897.6	37686.7	11284.4	14362.2	34372.4	11520.8
531.2	31331.1	30619.3	8981.6	13786.3	25180.3	9615.92	531.2	50071.7	51356.6	13272.3	16649.5	47114.6	14137.2	531.2	53812	52756.6	10589.1	19288.2	30981.4	23665.2	531.2	35266.4	36190.4	11234.3	15544.3	31693.2	11421.6
531.1	32400	31536.3	8920.5	15837	24133.2	9407.11	531.1	50512.6	52320.1	13169	17808.1	47051.5	13798.5	531.1	58288	57352.5	10447.5	22989.9	32473.5	22784	531.1	34638.8	35079.5	11189.1	17209.2	28905	11343.6
531	33817.3	32965.4	8856.32	18657.7	22795.8	9224.54	531	53579.5	53222.8	13064.1	19494.2	46342.3	13514.4	531	63615.3	62895.9	10290.7	27926.7	33710.7	21839.9	531	34846.2	34584.1	11145.1	19458.6	26138.6	11277
530.9	36379.3	35109.6	8788.08	22372.8	21250.1	9062.89	530.9	55633.6	54236.3	12950.3	21855.8	45014.2	13266.8	530.9	69419.3	69405.7	10115.9	34163.4	34629.6	20844.5	530.9	35413.8	34899.9	11100.5	22382.2	23502.1	11216.6
530.8	39075.8	38119.3	8712.65	27048	19581.8	8914.88	530.8	57935.3	55580.5	12830.4	25056.2	43136.2	13049	530.8	76367.1	76748	9921.56	41602.2	35178.6	19810.3	530.8	37205.3	36162.5	11054.8	26034.6	21078.3	11159.2
530.7	42849.6	42044.5	8629.65	32647.9	17879.5	8776.44	530.7	58857.4	57480.1	12703.7	29231	40804.5	12852.1	530.7	84340.5	84573.2	9703.81	49915	35317.3	18748.5	530.7	38693.7	38414.4	11005.6	30400.5	18924.1	11101
530.6	47207	46805.4	8536.1	39021	16215.4	8641.17	530.6	61256.6	60142.7	12574.1	34484.1	38133.7	12673	530.6	92061.8	92336.7	9459.2	58562.5	35025.2	17667.5	530.6	42033.4	41596.3	10953.6	35395.8	17066.1	11041.6
530.5	51619.3	52155	8430.38	45859.8	14651.4	8504.56	530.5	64731.4	63694.8	12437.4	40822.2	35245.2	12502.2	530.5	98635.2	99289.5	9188.49	66780.5	34305.4	16580.5	530.5	45716.8	45519.3	10895.1	40825.4	15507.2	10977
530.4	56252.5	57698.7	8312.31	52730.1	13229.3	8363.97	530.4	67907.7	68162.2	12290.5	48154.8	32256.2	12332.3	530.4	103982	104579	8895.35	73685.5	33183.7	15500.9	530.4	49344	49886	10829.7	46408.7	14230.6	10906.1
530.3	61080.8	62911.5	8181.25	59084.9	11972.4	8216.72	530.3	73073.5	73438.1	12134.3	56267.7	29278.4	12160.8	530.3	107006	107351	8583.73	78375.2	31702.6	14440.4	530.3	54146.2	54301.6	10757.2	51779.5	13207.6	10828.9
530.2	65589.3	67182.6	8036.64	64306.2	10889	8060.66	530.2	78867.9	79244.7	11963.2	64785.5	26406	11979.6	530.2	106676	106935	8261.17	80118.9	29924.4	13414.1	530.2	57090.8	58291.9	10675.7	56498.8	12401.5	10743
530.1	69102.5	69923.2	7879.31	67813.7	9972.74	7895.35	530.1	84109.3	85170.3	11775.3	73225.6	23709.9	11785.3	530.1	103509	103079	7938.64	78597.5	27921.9	12437	530.1	61007.7	61379.1	10588.4	60128.1	11776	10651.9
530	70871.3	70662.9	7711.93	69153.1	9211.25	7722.5	530	89044.9	90665.8	11572.1	80984.1	21247.8	11578.2	530	95961.2	96063	7625.44	74016.7	25774.8	11522.4	530	63000.7	63120.7	10493.6	62262	11292.5	10553.5
529.9	70030.4	69185.7	7539.27	68131.1	8586.95	7546.14	529.9	93029.1	95115.3	11354.6	87416.4	19049.9	11358.1	529.9	86868.4	86615.9	7335.94	67036.4	23565.7	10685.8	529.9	62777.3	63222	10394.9	62640.2	10920.1	10451.5
529.8	67051.1	65585.2	7368.43	64866.7	8082.54	7372.83	529.8	97601.9	97901.9	11125.2	91896.7	17128.3	11127.2	529.8	76450	75684.6	7075.29	58538.6	21364.3	9932.26	529.8	61173.5	61596.6	10296.4	61205.7	10633.7	10350
529.7	61920.8	60239.8	7205.28	59762	7680.28	7208.06	529.7	99772.9	98507.4	10882.3	93911.6	15477	10883.5	529.7	65017.5	64256.9	6847.93	49450.1	19236.7	9265.98	529.7	58502.5	58390.6	10200.8	58128	10412.6	10251.5
529.6	55045.5	53688.8	7055.69	53378.8	7363.88	7057.43	529.6	97445.3	96657.1	10632.7	93207.1	14082	10633.3	529.6	52980.8	53171.3	6657.3	40564.5	17233.6	8687.82	529.6	54708.6	53924.5	10110	53746.4	10239.9	10158.1
529.5	47167.9	46538.8	6924.5	46342.6	7119.64	6925.57	529.5	92535.1	92391.7	10388.9	89850.6	12929.6	10389.2	529.5	42920.9	43085.5	6505.48	32500.5	15398.4	8197.59	529.5	50329.7	48624	10026.1	48500.3	10104	10071.9
529.4	39345.5	39347	6814.49	39225.8	6935.04	6815.13	529.4	86397.4	86041.2	10158.2	84205.1	11994	10158.4	529.4	34266	34387.1	6386.14	25623.2	13750.8	7785.33	529.4	43894.8	42923.3	9950.33	42834.1	9996	9993.91
529.3	31769.4	32570.8	6725.56	32497.8	6798.2	6725.94	529.3	78524.8	78130.8	9944.04	76829.6	11245.1	9944.15	529.3	26572.6	27235.4	6294.77	20080.2	12302	7442.68	529.3	37136	37221.3	9886.51	37153.7	9912.66	9928.03
529.2	25733.7	26547.8	6657.09	26504.8	6699.81	6657.32	529.2	70741.8	69290.5	9751.44	68385.6	10656.2	9751.49	529.2	21755.6	21611.7	6228.31	15848.9	11056.5	7162.9	529.2	31700.8	31851.3	9835.28	31797.1	9849.92	9874.88
529.1	20931.2	21454.9	6604.94	21430.3	6629.44	6605.07	529.1	61095.3	60119.8	9580.15	59502.7	10197.2	9580.18	529.1	16990.2	17343.8	6177.43	12765.1	10001.2	6932.35	529.1	26849.2	27038.2	9794.17	26992.4	9802.18	9831.98
529	16799.9	17352.8	6565.78	17339	6579.49	6565.85	529	51633.2	51174.6	9435.48	50761.6	9848.43	9435.49	529	13867.3	14212	6141.99	10621.1	9127.73	6747.16	529	22166.6	22923.6	9762.11	22883.2	9766.39	9798.24
528.9	13815.3	14191	6537.8	14183.5	6545.29	6537.84	528.9	42790.5	42876.9	9316.96	42605.8	9588.07	9316.97	528.9	11771.3	11967	6116.67	9186.2	8416.15	6598.05	528.9	18765.9	19551.6	9738.78	19514.8	9741.02	9773.35
528.8	11726.2	11852	6517.9	11848	6521.89	6517.93	528.8	34198.8	35517.6	9222.95	35343.1	9397.51	9222.96	528.8	10560.1	10382.8	6098.14	8255.34	7845.69	6478.03	528.8	16251	16894	9721.81	16859.8	9722.95	9754.92
528.7	10382.5	10189	6503.66	10186.9	6505.74	6503.68	528.7	28231.6	29267.3	9152.81	29157	9263.09	9152.81	528.7	9392.46	9273.8	6083.52	7664.06	7395.73	6381.04	528.7	14722.1	14878.4	9709.54	14846.1	9710.11	9741.26
528.6	9406.41	9045.48	6493.06	9044.42	6494.11	6493.07	528.6	23808.6	24152.8	9099.23	24084.5	9167.56	9099.23	528.6	8740.58	8496.61	6072.68	7290.98	7047.13	6303.85	528.6	13814.1	13399.1	9700.11	13368.4	9700.39	9730.55
528.5	8706.63	8283.35	6485.1	8282.83	6485.62	6485.1	528.5	20105.9	20122.5	9057.92	20080.9	9099.46	9057.92	528.5	8617.26	7947.49	6063.93	7052.04	6781.12	6242.2	528.5	12654.8	12347.5	9692.38	12318.1	9692.51	9721.6
528.4	8250.79	7786.5	6479.02	7786.25	6479.27	6479.03	528.4	16825	17052.5	9026.89	17027.7	9051.67	9026.89	528.4	8047.77	7552.61	6055.56	6891.88	6579.89	6191.97	528.4	11842.9	11620	9686.81	11591.8	9686.87	9714.88
528.3	7762.53	7466.34	6474.18	7466.22	6474.3	6474.18	528.3	14945.7	14787.9	9004.99	14773.4	9019.49	9004.99	528.3	7440.12	7264.92	6049.03	6779.4	6431	6152.58	528.3	11301.5	11126.9	9682.76	11099.8	9682.78	9709.75
528.2	7501.9	7260.31	6470.66	7260.25	6470.71	6470.66	528.2	13154	13166.1	8988.31	13157.8	8996.63	8988.31	528.2	7359.84	7052.58	6044.48	6695.98	6323.06	6122.49	528.2	11577.7	10797.2	9679.71	10771.2	9679.73	9705.69
528.1	7222.41	7124.77	6467.84	7124.74	6467.86	6467.84	528.1	12443	12033.2	8976.61	12028.5	8981.29	8976.61	528.1	7060.8	6892	6040.16	6629.23	6244.63	6098.47	528.1	10956.7	10575.6	9676.15	10550.6	9676.15	9701.16
528	6987.33	7032.42	6465.78	7032.41	6465.79	6465.78	528	11110.3	11256.8	8966.87	11254.2	8969.46	8966.87	528	6926.35	6769.42	6036.82	6574.12	6188.86	6080.07	528	11159.8	10426.1	9673.74	10402	9673.74	9697.84
527.9	6871.82	6966.12	6464.35	6966.12	6464.35	6464.35	527.9	10923.7	10733	8960.85	10731.6	8962.25	8960.85	527.9	6894.75	6674.06	6033.9	6526.9	6149.23	6065.74	527.9	10645.8	10321	9670.94	10297.8	9670.94	9694.18
527.8	6821.05	6915.51	6463.24	6915.51	6463.24	6463.24	527.8	10261.2	10378.5	8955.34	10377.8	8956.08	8955.34	527.8	6618.29	6598.39	6031.08	6485.36	6120.86	6054.33	527.8	9993.15	10245.1	9669.11	10222.7	9669.11	9691.53
527.7	6588.97	6874.71	6462.26	6874.71	6462.26	6462.26	527.7	10488	10137.6	8951.67	10137.2	8952.06	8951.67	527.7	6492.99	6538.18	6029.16	6449.24	6101.24	6046.01	527.7	10028.9	10188.1	9668.5	10166.5	9668.5	9690.15
527.6	6436.96	6840.91	6461.91	6840.91	6461.91	6461.91	527.6	10071.2	9967.85	8947.36	9967.65	8947.56	8947.36	527.6	6391.23	6489.15	6027.64	6417.25	6087.43	6039.75	527.6	10504.3	10142.3	9667.82	10121.4	9667.82	9688.74
527.5	6428.67	6812.08	6461.98	6812.08	6461.98	6461.98	527.5	10336.6	9845.03	8944.2	9844.93	8944.3	8944.2	527.5	6487.02	6448.6	6026.45	6388.78	6077.62	6035.09	527.5	10086.9	10103.2	9666.25	10083	9666.25	9686.47
527.4	6428.66	6786.72	6462.07	6786.72	6462.07	6462.07	527.4	10222.9	9750.43	8940.29	9750.38	8940.34	8940.29	527.4	6430.91	6413.89	6024.94	6362.73	6069.98	6031.06	527.4	9770.37	10070.1	9665.46	10050.6	9665.46	9685.01
527.3	6420.1	6764.12	6462.16	6764.12	6462.16	6462.16	527.3	10055.1	9674.75	8936.69	9674.73	8936.71	8936.69	527.3	6435.19	6384.07	6023.61	6339.23	6064.15	6027.91	527.3	10267.1	10041.6	9665.26	10022.6	9665.26	9684.18
527.2	6347.55	6743.88	6462.28	6743.88	6462.28	6462.28	527.2	10099.8	9611.98	8933.55	9611.97	8933.56	8933.55	527.2	6309.42	6357.95	6022.26	6317.82	6059.4	6025.26	527.2	9869.02	10015.2	9664.13	9996.88	9664.13	9682.45
527.1	6312.53	6725.82	6462.59	6725.82	6462.59	6462.59	527.1	9522.76	9557.69	8930.27	9557.68	8930.28	8930.27	527.1	6307.83	6335.17	6021.32	6298.63	6055.78	6023.39	527.1	9737.79	9992.12	9663.75	9974.38	9663.75	9681.49
527	6266.28	6709.58	6463	6709.58	6463	6463	527	9495	9511.43	8928.61	9511.42	8928.61	8928.61	527	6178.81	6314.78	6020.38	6281.08	6052.65	6021.8	527	10071.6	9971.48	9663.61	9954.28	9663.61	9680.8
526.9	6294.69	6694.99	6463.54	6694.99	6463.54	6463.54	526.9	9360.67	9470.21	8927.02	9470.21	8927.02	8927.02	526.9	6132.03	6296.78	6019.86	6265.39	6050.28	6020.83	526.9	9861.61	9952.09	9662.84	9935.42	9662.84	9679.51
526.8	6337.37	6681.65	6464	6681.65	6464	6464	526.8	9617.27	9433.41	8925.8	9433.41	8925.8	8925.8	526.8	6168.83	6280.57	6019.49	6251.11	6048.3	6020.15	526.8	9629.53	9934.73	9662.47	9918.56	9662.47	9678.64
526.7	6291.2	6669.39	6464.35	6669.39	6464.35	6464.35	526.7	9556.24	9399.34	8923.86	9399.34	8923.86	8923.86	526.7	5973.74	6265.67	6019	6237.86	6046.37	6019.44	526.7	10005.9	9919.28	9662.53	9903.58	9662.53	9678.22
526.6	6464.82	6658.3	6464.82	6658.3	6464.82	6464.82	526.6	9490.46	9368.38	8922.08	9368.38	8922.08	8922.08	526.6	6019.15	6252.61	6019.15	6226.26	6045.21	6019.44	526.6	9688.41	9904.4	9661.88	9889.16	9661.88	9677.12
							526.5	9514.61	9340.19	8920.49	9340.19	8920.49	8920.49								526.5	9882.88	9891.28	9661.83	9876.48	9661.83	9676.63
							526.4	9581.68	9314.22	8918.82	9314.22	8918.82	8918.82								526.4	9705.39	9878.83	9661.42	9864.45	9661.42	9675.8
							526.3	9086.47	9290.08	8916.95	9290.08	8916.95	8916.95								526.3	9404.08	9867.63	9661.33	9853.65	9661.33	9675.32
							526.2	9249.84	9269.14	8916.48	9269.14	8916.48	8916.48								526.2	9467.08	9857.84	9661.82	9844.24	9661.82	9675.41
							526.1	9456.21	9249.35	8915.54	9249.35	8915.54	8915.54								526.1	9899.08	9848.67	9662.18	9835.45	9662.18	9675.41
							526	9044.51	9230.44	8914.02	9230.44	8914.02	8914.02								526	10023.9	9839.39	9661.74	9826.51	9661.74	9674.61
							525.9	9126.99	9214	8913.66	9214	8913.66	8913.66								525.9	9424.83	9830.48	9661.06	9817.95	9661.06	9673.59
							525.8	9088.51	9198.5	8913.06	9198.5	8913.06	8913.06								525.8	9485.75	9823.26	9661.5	9811.05	9661.5	9673.71
							525.7	8855.79	9184.19	8912.57	9184.19	8912.57	8912.57								525.7	9979.4	9816.44	9661.83	9804.55	9661.83	9673.72
							525.6	9058.39	9171.49	8912.73	9171.49	8912.73	8912.73								525.6	10087.7	9809.15	9661.23	9797.56	9661.23	9672.82
							525.5	9352.5	9159.11	8912.32	9159.11	8912.32	8912.32								525.5	9349.99	9802.09	9660.43	9790.8	9660.43	9671.73
							525.4	9161.25	9146.72	8911.08	9146.72	8911.08	8911.08								525.4	9659.5	9796.81	9661.02	9785.8	9661.02	9672.03
							525.3	8863.27	9135.58	8910.38	9135.58	8910.38	8910.38								525.3	9661.02	9791.31	9661.02	9780.56	9661.02	9671.77
							525.2	8910.51	9125.96	8910.51	9125.96	8910.51	8910.51
