# Supplementary material for: Magnetite nanoparticles modulate microbial nitrate reduction pathways: Implications for nitrogen cycle in ferruginous oceans
Source: Research Square preprint supplement (doi:10.21203/rs.3.rs-2418923/v1), 2023-01-20
Supplement: Supplementary file 2 [file c0f16459be8b8cd839fe1c4f.docx]

**Supplementary material for**

# Magnetite nanoparticles modulate microbial nitrate reduction pathways: Implications for nitrogen cycle in ferruginous oceans

Pengcong Wang1, 2, Genming Luo1, 2, Dominic Papineau2, 3, Deng Liu2, 4, *, Hongmei Wang2, 4, Yiliang Li5, & Zongmin Zhu1, 2, *

1 Hubei Key Laboratory of Critical Zone Evolution, School of Earth Sciences, China University of Geosciences, Wuhan 430074, China

2 State Key Laboratory of Biogeology and Environmental Geology, China University of Geosciences, Wuhan 430074, China

3 Department of Earth Sciences, London Centre for Nanotechnology, and Centre for Planetary Sciences, University College London, London, UK

4 School of Environmental Studies, China University of Geosciences, Wuhan 430078, China

5 Department of Earth Sciences, the University of Hong Kong, Hong Kong, China

* Corresponding authors: Zongmin Zhu (zhumin@cug.edu.cn) or Deng Liu ([liudeng@cug.edu.cn](mailto:liudeng@cug.edu.cn))

Number of Figures: 3

**Figure S1.** Fe 2p XPS spectra of CM (a) and HM (b) before and after microbial nitrate reduction.

**Figure S2.** Linear fitting of Fe(II)/FeTotal ratio (chemical) and the absolute value of Δχ (|Δχ| value) of CM (a) and HM (b).

**Figure S3.** O 1s XPS spectra of CM (a and b) and HM (c and d) before and after the treatment of strain 2002.


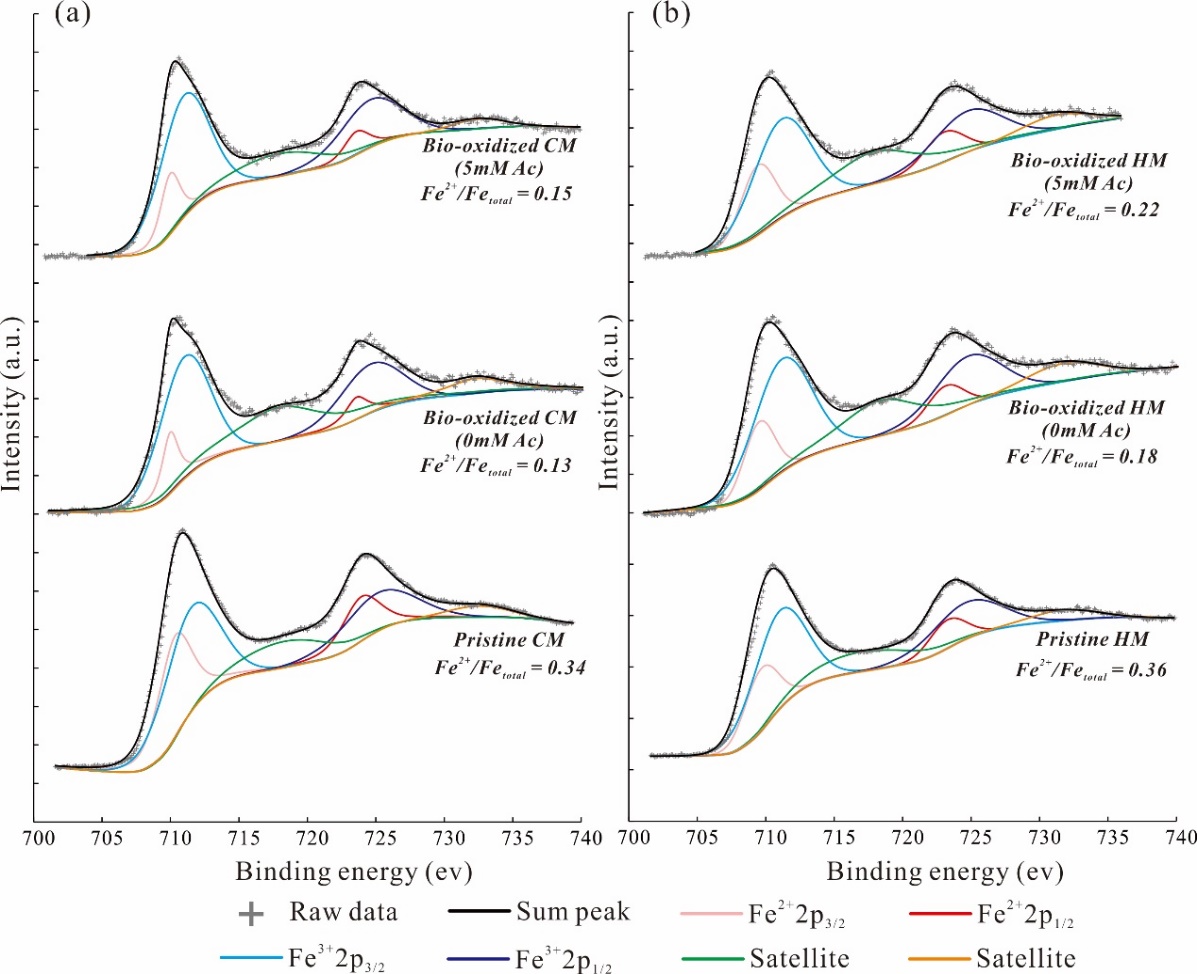


**Figure S1**


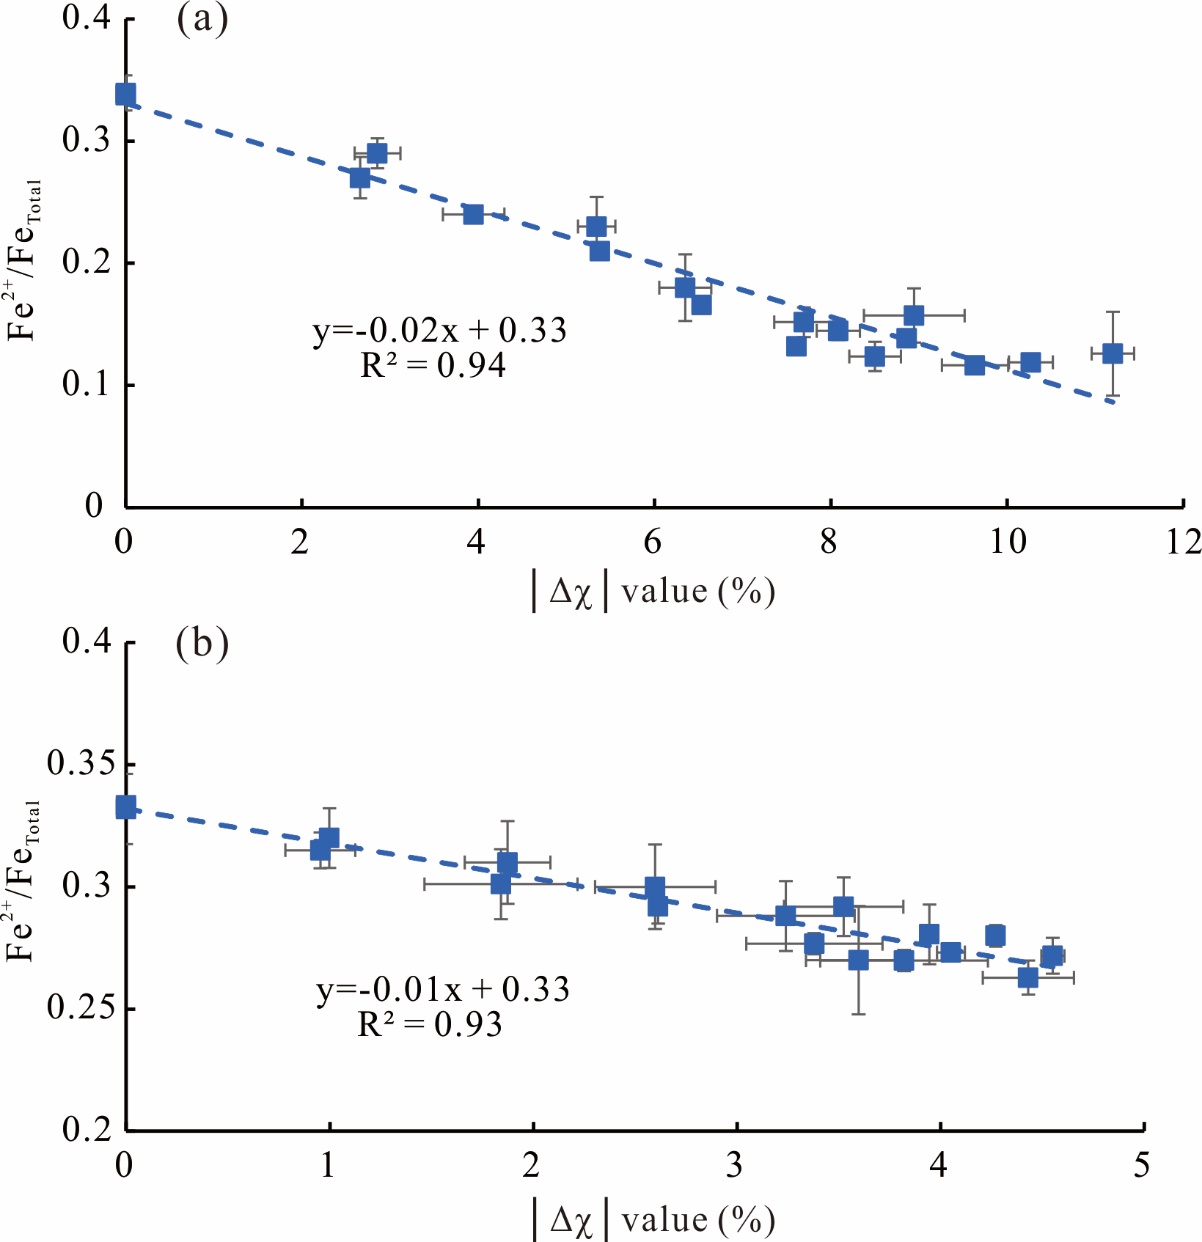


**Figure S2**


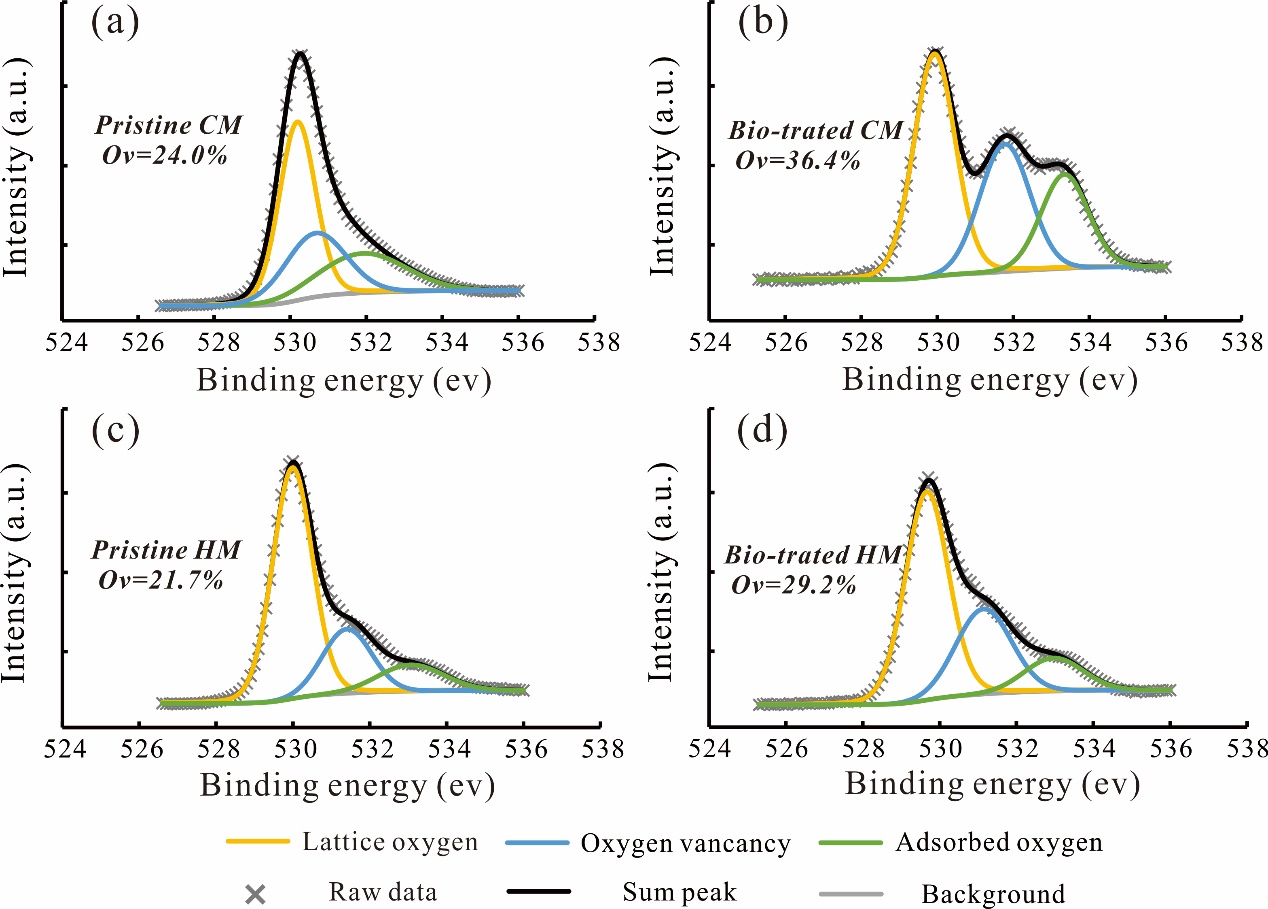


**Figure S3**
